# Supplementary material for: Deep Learning for RNA Secondary Structure Determination: Gauging Generalizability and Broadening the Scope of Traditional Methods
Source: bioRxiv preprint, doi:10.1101/2025.11.04.686644, version 1 (2025-11-07)
Supplement: Supplemental File 3 [file 686644_file08.xlsx]

## Sheet: SARS-CoV-2
Source	Start	End	Length	Putative	Sequence	SHAPE in vitro From Study	Re-normalized SHAPE	RNet Predicted SHAPE	RNet Predicted DMS	Similarity
Manfredonia et al.	150	294	145	N	UCGUUGACAGGACACGAGUAACUCGUCUAUCUUCUGCAGGCUGCUUACGGUUUCGUCCGUGUUGCAGCCGAUCAUCAGCACAUCUAGGUUUUGUCCGGGUGUGACCGAAAGGUAAGAUGGAGAGCCUUGUCCCUGGUUUCAACGA	1.393 0.025 0.0 0.0 0.024 0.0 0.028 0.011 0.015 0.0 0.0 0.091 0.092 0.023 0.319 0.168 0.116 0.21 0.553 0.571 0.536 0.012 0.102 0.164 2.993 0.002 2.943 0.023 0.025 0.0 0.038 0.181 0.094 0.0 0.107 0.378 0.161 1.262 0.0 0.0 0.0 0.0 0.0 0.016 0.233 0.191 0.037 0.03 0.0 0.637 0.331 0.741 5.224 0.895 1.787 0.731 0.289 0.023 0.016 1.391 3.323 0.33 0.199 0.0 0.0 0.001 0.0 0.0 0.0 0.0 0.014 0.0 0.039 0.51…	1.1745362563237776 0.021079258010118045 0.0 0.0 0.020236087689713324 0.0 0.02360876897133221 0.00927487352445194 0.012647554806070826 0.0 0.0 0.07672849915682968 0.0775716694772344 0.0193929173693086 0.26897133220910624 0.14165261382799327 0.09780775716694773 0.17706576728499157 0.46627318718381117 0.4814502529510961 0.4519392917369309 0.010118043844856662 0.08600337268128162 0.13827993254637438 …	[0.11667684465646744, 0.07734869420528412, 0.05929376929998398, 0.06989258527755737, 0.09848599880933762, 0.09152563661336899, 0.15309303998947144, 0.051343679428100586, 0.07766169309616089, 0.05571170151233673, 0.06181810796260834, 0.20753416419029236, 0.16563385725021362, 0.10828356444835663, 0.30968716740608215, 0.19363100826740265, 0.20956191420555115, 0.21623164415359497, 0.7537049055099487,…	[0.0762554407119751, 0.14046995341777802, 0.17336541414260864, 0.061630845069885254, 0.05315333604812622, 0.07375068962574005, 0.6178381443023682, 0.4039246439933777, 0.40058037638664246, 0.07702535390853882, 0.06268353015184402, 0.7576870918273926, 0.9968366622924805, 0.39263051748275757, 0.5572031736373901, 0.08819372951984406, 0.44274967908859253, 0.12496629357337952, 0.36577391624450684, 1.00…	85.52
Manfredonia et al.	3462	3616	155	N	AACAUGGAGGAGGUGUUGCAGGAGCCUUAAAUAAGGCUACUAACAAUGCCAUGCAAGUUGAAUCUGAUGAUUACAUAGCUACUAAUGGACCACUUAAAGUGGGUGGUAGUUGUGUUUUAAGCGGACACAAUCUUGCUAAACACUGUCUUCAUGUU	0.184 0.679 0.118 0.238 0.252 0.0 0.045 0.226 0.073 0.093 1.253 0.0 0.032 0.111 0.0 0.104 0.352 0.032 0.172 0.272 0.0 0.083 0.077 1.565 0.0 0.09 0.725 0.593 0.501 0.529 4.068 3.711 0.325 1.015 0.0 0.0 0.008 0.053 0.412 0.017 0.083 0.39 0.579 0.671 0.263 0.311 0.188 0.432 0.373 0.349 0.052 0.136 0.0 0.007 0.005 0.026 0.0 0.0 0.162 0.161 0.324 0.52 0.045 0.03 0.064 0.071 0.204 0.04 0.0 0.041 0.328 …	0.1551433389544688 0.5725126475548061 0.09949409780775717 0.20067453625632378 0.2124789207419899 0.0 0.03794266441821248 0.19055649241146713 0.061551433389544684 0.07841483979763912 1.0564924114671164 0.0 0.026981450252951098 0.09359190556492412 0.0 0.08768971332209106 0.29679595278246207 0.026981450252951098 0.14502529510961212 0.22934232715008435 0.0 0.06998313659359191 0.06492411467116357 1.31…	[0.12079931795597076, 0.022420328110456467, 0.04091931879520416, 0.05500121787190437, 0.09986874461174011, 0.030447710305452347, 0.036427002400159836, 0.08500714600086212, 0.10185015946626663, 0.14244244992733002, 0.4897105097770691, 0.32433584332466125, 0.17023110389709473, 0.2844507098197937, 0.14643773436546326, 0.20554810762405396, 0.31529170274734497, 0.11407405138015747, 0.3322513699531555,…	[0.24764080345630646, 0.2162282019853592, 0.23072537779808044, 0.16929657757282257, 0.07783284038305283, 0.084525465965271, 0.07176904380321503, 0.25122812390327454, 0.1031893864274025, 0.13136792182922363, 1.002762794494629, 0.14026549458503723, 0.15389589965343475, 0.08956660330295563, 0.18021082878112793, 0.07292940467596054, 0.10561957210302353, 0.1332915723323822, 1.0040948390960693, 0.59937…	67.1
Manfredonia et al.	7924	8128	205	N	UGCAAAAUCAGCGUCUGUUUACUACAGUCAGCUUAUGUGUCAACCUAUACUGUUACUAGAUCAGGCAUUAGUGUCUGAUGUUGGUGAUAGUGCGGAAGUUGCAGUUAAAAUGUUUGAUGCUUACGUUAAUACGUUUUCAUCAACUUUUAACGUACCAAUGGAAAAACUCAAAACACUAGUUGCAACUGCAGAAGCUGAACUUGCA	0.062 0.0 0.0 0.014 0.067 0.101 2.716 0.095 0.014 0.11 0.0 0.037 0.246 0.0 0.107 0.215 1.303 0.397 1.024 1.965 2.005 1.119 0.292 1.229 0.319 0.516 1.239 1.436 0.04 0.172 0.663 0.078 1.65 1.105 0.642 0.867 0.328 0.015 0.02 0.135 0.259 0.485 1.02 0.204 0.087 0.842 0.761 0.172 2.065 0.002 0.028 0.0 0.02 0.008 0.019 0.037 0.005 0.111 0.0 0.322 0.0 0.006 0.0 0.0 0.0 0.023 0.174 0.275 1.096 3.06 1.461 …	0.05227655986509275 0.0 0.0 0.011804384485666106 0.056492411467116366 0.0851602023608769 2.2900505902192245 0.08010118043844858 0.011804384485666106 0.0927487352445194 0.0 0.031197301854974706 0.20741989881956155 0.0 0.09021922428330523 0.1812816188870152 1.0986509274873524 0.33473861720067455 0.8634064080944351 1.6568296795952784 1.690556492411467 0.9435075885328836 0.24620573355817874 1.0362563…	[0.15943273901939392, 0.047276001423597336, 0.08962946385145187, 0.09896524995565414, 0.15561005473136902, 0.31664586067199707, 0.5411922931671143, 0.291565477848053, 0.0624924898147583, 0.07007426023483276, 0.07293396443128586, 0.05058968812227249, 0.2963676452636719, 0.15776103734970093, 0.10594352334737778, 0.06503535062074661, 0.3252221345901489, 0.6613417267799377, 0.8713598847389221, 0.6893…	[0.046136289834976196, 0.120097815990448, 0.2454439103603363, 0.18816426396369934, 0.24214714765548706, 0.9150704741477966, 0.9851416349411011, 0.12654870748519897, 0.2894625663757324, 0.207888662815094, 0.097066730260849, 0.3625425100326538, 0.21418052911758423, 0.1439225971698761, 0.16074281930923462, 0.1272464245557785, 0.127579927444458, 0.2142224758863449, 0.2343353033065796, 0.2910922169685…	52.68
Manfredonia et al.	18071	18329	259	N	GUAGUAAGGUAAUCACUGGGUUACAUCCUACACAGGCACCUACACACCUCAGUGUUGACACUAAAUUCAAAACUGAAGGUUUAUGUGUUGACAUACCUGGCAUACCUAAGGACAUGACCUAUAGAAGACUCAUCUCUAUGAUGGGUUUUAAAAUGAAUUAUCAAGUUAAUGGUUACCCUAACAUGUUUAUCACCCGCGAAGAAGCUAUAAGACAUGUACGUGCAUGGAUUGGCUUCGAUGUCGAGGGGUGUCAUGCUAC	0.155 0.137 1.123 0.113 0.17 0.139 1.941 0.493 0.119 0.468 0.07 0.242 0.082 0.19 0.278 1.588 0.57 0.0 0.0 0.254 0.07 0.201 0.225 0.042 0.457 0.585 0.024 0.056 0.211 0.618 1.125 0.022 0.018 0.49 0.0 0.0 0.259 1.18 0.146 0.173 0.592 0.235 0.279 0.02 0.022 0.15 0.199 0.03 0.155 0.036 0.078 0.0 0.086 0.065 0.17 0.107 0.0 0.051 0.16 0.211 1.572 2.412 0.132 0.242 1.546 0.647 0.162 0.101 0.008 0.041 0.1…	0.13069139966273188 0.1155143338954469 0.9468802698145026 0.09527824620573357 0.1433389544688027 0.11720067453625634 1.636593591905565 0.41568296795952786 0.10033726812816189 0.3946037099494098 0.05902192242833053 0.20404721753794267 0.06913996627318719 0.16020236087689715 0.23440134907251267 1.3389544688026982 0.4806070826306914 0.0 0.0 0.21416526138279934 0.05902192242833053 0.1694772344013491 …	[0.15708503127098083, 0.23864677548408508, 0.19183270633220673, 0.27768170833587646, 0.41235512495040894, 0.42644914984703064, 0.44175437092781067, 0.2242371141910553, 0.040432289242744446, 0.10266939550638199, 0.08141693472862244, 0.10352993756532669, 0.16779078543186188, 0.16273276507854462, 0.0709170401096344, 0.46532371640205383, 0.3513740301132202, 0.07400109618902206, 0.017272338271141052, …	[0.1076013445854187, 0.1352938562631607, 0.42765602469444275, 0.14612075686454773, 0.21054671704769135, 0.5427637100219727, 0.7410588264465332, 0.09084393084049225, 0.077255479991436, 0.09186513721942902, 0.1612495332956314, 0.19981306791305542, 0.10566190630197525, 0.25679460167884827, 0.4634847640991211, 1.0012046098709106, 0.213882714509964, 0.07895208150148392, 0.08381892740726471, 0.08028890…	42.86
Manfredonia et al.	20241	20411	171	N	UCAAAUGGAAAUUGAUUUCUUAGAAUUAGCUAUGGAUGAAUUCAUUGAACGGUAUAAAUUAGAAGGCUAUGCCUUCGAACAUAUCGUUUAUGGAGAUUUUAGUCAUAGUCAGUUAGGUGGUUUACAUCUACUGAUUGGACUAGCUAAACGUUUUAAGGAAUCACCUUUUGA	0.107 0.302 0.038 0.083 0.529 0.51 0.258 0.967 0.132 0.399 3.486 0.384 0.527 0.0 0.02 0.0 0.011 0.0 0.01 0.047 0.065 0.074 0.024 0.297 0.42 0.182 0.238 0.093 0.0 0.377 0.129 0.979 2.134 0.245 0.958 0.569 1.107 1.306 0.739 3.164 0.251 0.01 0.064 0.096 0.267 1.214 0.0 0.0 0.027 0.036 0.0 0.0 0.079 0.86 0.292 0.729 0.981 1.277 0.483 0.377 0.377 0.0 0.025 0.065 0.0 0.0 0.403 0.635 2.832 3.857 0.0 0.1…	0.09021922428330523 0.254637436762226 0.03204047217537943 0.06998313659359191 0.44603709949409787 0.4300168634064081 0.21753794266441823 0.815345699831366 0.11129848229342328 0.336424957841484 2.93929173693086 0.3237774030354132 0.4443507588532884 0.0 0.016863406408094438 0.0 0.00927487352445194 0.0 0.008431703204047219 0.03962900505902192 0.05480607082630692 0.06239460370994941 0.020236087689713…	[0.13724380731582642, 0.0661911591887474, 0.037451259791851044, 0.0569298192858696, 0.12725436687469482, 0.22002464532852173, 0.08657394349575043, 0.2551169991493225, 0.4171094298362732, 0.8218554258346558, 0.9758837819099426, 0.9459163546562195, 0.455764502286911, 0.07585032284259796, 0.0604327954351902, 0.04547686502337456, 0.1221771389245987, 0.081252820789814, 0.021871857345104218, 0.02959968…	[0.04993493854999542, 0.17191335558891296, 0.13181829452514648, 0.14449620246887207, 0.15120485424995422, 0.1297597885131836, 0.06481247395277023, 0.08830984681844711, 0.9922424554824829, 0.9596710205078125, 0.8552050590515137, 0.4789838492870331, 0.2105002999305725, 0.06435051560401917, 0.19092702865600586, 0.04851667582988739, 0.07272081077098846, 0.07855329662561417, 0.08841463923454285, 0.057…	41.52
Manfredonia et al.	22826	22913	88	N	AAUUAUAAAUUACCAGAUGAUUUUACAGGCUGCGUUAUAGCUUGGAAUUCUAACAAUCUUGAUUCUAAGGUUGGUGGUAAUUAUAAUU	1.654 0.245 0.194 0.602 0.324 0.238 0.6 1.324 2.139 0.057 0.047 0.203 0.007 0.043 0.249 0.692 1.817 1.017 0.0 0.707 0.37 0.051 0.021 1.056 3.554 0.046 0.065 0.0 0.0 0.058 0.372 0.07 0.512 0.56 0.503 2.145 1.543 0.194 3.086 0.0 0.126 0.02 0.044 0.0 0.0 0.074 0.079 0.071 0.159 0.063 0.133 0.171 1.16 0.011 0.047 0.052 0.052 0.288 0.756 0.441 0.823 1.459 1.823 3.416 0.458 1.155 0.029 0.055 0.0 0.0 0.…	1.3946037099494097 0.20657672849915684 0.16357504215851604 0.5075885328836425 0.2731871838111299 0.20067453625632378 0.5059021922428331 1.1163575042158518 1.8035413153456998 0.04806070826306914 0.03962900505902192 0.17116357504215854 0.005902192242833053 0.03625632377740303 0.20994940978077573 0.5834738617200674 1.5320404721753795 0.857504215851602 0.0 0.5961214165261383 0.31197301854974707 0.043…	[0.05910255014896393, 0.06618336588144302, 0.10193575918674469, 0.05105045810341835, 0.054336026310920715, 0.14326056838035583, 0.1901027411222458, 0.509913980960846, 0.39784401655197144, 0.07821165025234222, 0.0031533949077129364, 0.0037710368633270264, 9.764730930328369e-05, 0.00026208534836769104, 0.26434069871902466, 0.40555185079574585, 0.4667951762676239, 0.248074471950531, 0.08399565517902…	[0.22934937477111816, 0.15870922803878784, 0.037686824798583984, 0.04430928826332092, 0.26778000593185425, 0.07609042525291443, 0.5221145153045654, 0.34575414657592773, 0.5812637805938721, 0.02586144208908081, 0.013761669397354126, 0.05974219739437103, 0.005256146192550659, 0.02567729353904724, 0.6760066151618958, 0.1816731095314026, 1.0033360719680786, 0.23066088557243347, 0.09772972762584686, 0…	0
Manfredonia et al.	23970	24098	129	N	CACAAAUAUUACCAGAUCCAUCAAAACCAAGCAAGAGGUCAUUUAUUGAAGAUCUACUUUUCAACAAAGUGACACUUGCAGAUGCUGGCUUCAUCAAACAAUAUGGUGAUUGCCUUGGUGAUAUUGCUG	0.413 0.0 0.0 0.472 0.601 0.566 0.045 0.074 0.19 0.063 0.591 0.022 0.0 0.981 0.068 2.032 0.402 0.327 0.096 0.208 0.819 0.505 0.089 0.365 1.116 4.851 0.719 0.975 0.372 0.736 0.099 0.194 0.0 0.018 0.574 1.022 0.889 0.087 0.0 0.08 0.078 0.242 0.016 0.772 0.297 0.0 0.0 0.0 0.0 0.063 0.0 0.26 0.437 0.143 0.323 2.449 1.944 0.164 0.523 0.073 0.0 0.058 0.17 0.217 0.03 0.537 0.226 2.936 0.212 0.0 0.0 0.06…	0.3482293423271501 0.0 0.0 0.3979763912310287 0.5067453625632378 0.47723440134907247 0.03794266441821248 0.06239460370994941 0.16020236087689715 0.053119730185497475 0.49831365935919053 0.01854974704890388 0.0 0.8271500843170321 0.05733558178752109 1.7133220910623947 0.3389544688026982 0.27571669477234406 0.0809443507588533 0.17537942664418213 0.6905564924114671 0.4258010118043845 0.0750421585160…	[0.20951853692531586, 0.026899561285972595, 0.22795525193214417, 0.07917781174182892, 0.8434152007102966, 0.17610731720924377, 0.13934572041034698, 0.08864393085241318, 0.09773984551429749, 0.09829133749008179, 0.008491143584251404, 0.003095075488090515, 0.007316362112760544, 0.2501339316368103, 0.37236881256103516, 0.3867374062538147, 0.28568005561828613, 0.24925093352794647, 0.04483199864625931…	[0.35471099615097046, 0.36155325174331665, 0.5221673846244812, 0.4576197862625122, 0.37098395824432373, 0.289371520280838, 0.06905504316091537, 0.17609600722789764, 0.05357515811920166, 0.06353883445262909, 0.13541337847709656, 0.07249939441680908, 0.12431854009628296, 0.2879510819911957, 0.13511918485164642, 1.00029456615448, 0.33642709255218506, 0.9797612428665161, 0.342892050743103, 0.23898510…	58.91
Manfredonia et al.	28065	28118	54	N	AUUGAAUUGUGCGUGGAUGAGGCUGGUUCUAAAUCACCCAUUCAGUACAUCGAU	0.654 0.18 0.504 1.456 0.722 1.686 0.28 0.381 0.035 0.101 0.339 1.992 2.485 1.407 0.086 0.0 0.053 0.055 0.0 2.391 0.061 0.251 1.387 0.145 0.0 0.067 0.257 0.518 0.762 1.979 0.319 0.384 2.876 0.015 0.083 0.12 0.364 0.001 0.063 0.004 0.0 0.012 0.008 0.011 0.0 0.0 0.018 0.004 0.082 0.175 0.201 0.043 0.098 0.038	0.5514333895446881 0.15177065767284992 0.4249578414839798 1.2276559865092749 0.6087689713322091 1.4215851602023608 0.2360876897133221 0.321247892074199 0.029510961214165264 0.0851602023608769 0.2858347386172007 1.6795952782462058 2.0952782462057336 1.1863406408094437 0.07251264755480606 0.0 0.04468802698145025 0.0463743676222597 0.0 2.01602023608769 0.05143338954468803 0.21163575042158517 1.16947…	[0.3211694359779358, 0.26219940185546875, 0.4106656014919281, 0.3282984793186188, 0.5211209058761597, 0.7553070187568665, 0.9177787899971008, 0.4341275691986084, 0.10301332920789719, 0.12183494865894318, 0.10668188333511353, 0.5716140866279602, 0.8532418608665466, 0.5855627655982971, 0.14494949579238892, 0.06485164165496826, 0.08605045080184937, 0.10268773883581161, 0.22729277610778809, 0.8680225…	[0.47890257835388184, 0.10042427480220795, 0.09182608127593994, 0.11558523774147034, 0.45923542976379395, 0.5859514474868774, 0.2322690486907959, 0.0887489765882492, 0.16174499690532684, 0.06367581337690353, 0.29832783341407776, 0.2685270309448242, 0.3765300512313843, 0.16632679104804993, 0.09883138537406921, 0.05356672406196594, 0.11002547293901443, 0.040742501616477966, 0.12525725364685059, 0.9…	83.33
Manfredonia et al.	29622	29867	246	N	AUUCUCGUAACUACAUAGCACAAGUAGAUGUAGUUAACUUUAAUCUCACAUAGCAAUCUUUAAUCAGUGUGUAACAUUAGGGAGGACUUGAAAGAGCCACCACAUUUUCACCGAGGCCACGCGGAGUACGAUCGAGUGUACAGUGAACAAUGCUAGGGAGAGCUGCCUAUAUGGAAGAGCCCUAAUGUGUAAAAUUAAUUUUAGUAGUGCUAUCCCCAUGUGAUUUUAAUAGCUUCUUAGGAGAAU	0.358 0.606 0.15 0.244 0.0 0.125 0.021 0.024 0.0 0.043 0.003 0.055 0.01 0.038 0.191 0.223 0.219 0.406 0.632 0.567 0.227 1.914 0.959 0.44 0.523 0.551 2.669 0.145 0.021 0.0 0.0 0.0 0.0 0.023 0.151 0.026 0.027 0.015 0.064 0.029 0.129 0.029 0.047 0.0 0.026 0.033 0.078 0.259 0.076 0.405 0.858 0.253 0.0 0.037 0.084 0.996 0.854 0.09 0.085 0.181 0.146 0.085 0.136 0.07 0.289 0.293 0.071 0.141 0.0 0.04 0.0…	0.30185497470489037 0.5109612141652614 0.12647554806070826 0.2057335581787521 0.0 0.10539629005059023 0.01770657672849916 0.020236087689713324 0.0 0.03625632377740303 0.0025295109612141656 0.0463743676222597 0.008431703204047219 0.03204047217537943 0.16104553119730186 0.18802698145025296 0.18465430016863407 0.3423271500843171 0.5328836424957841 0.47807757166947723 0.19139966273187187 1.6138279932…	[0.2712058126926422, 0.31884366273880005, 0.16048170626163483, 0.09139673411846161, 0.03249988704919815, 0.15421035885810852, 0.371526300907135, 0.291839599609375, 0.11485210806131363, 0.040994904935359955, 0.024859335273504257, 0.06867507845163345, 0.0362502783536911, 0.02891770750284195, 0.1869436800479889, 0.2437070608139038, 0.21523891389369965, 0.4810865819454193, 0.5324190855026245, 0.21399…	[0.4239814877510071, 0.08578704297542572, 0.061412543058395386, 0.23074039816856384, 0.10041727870702744, 0.4528137445449829, 0.19412323832511902, 0.19698455929756165, 0.20424598455429077, 0.2199612557888031, 0.2018883228302002, 0.09220871329307556, 0.17536500096321106, 0.2263776659965515, 0.21737590432167053, 0.12416552007198334, 0.8674929738044739, 0.19673867523670197, 0.8712059855461121, 0.914…	43.5
Manfredonia et al.	1	394	394	N	AUUAAAGGUUUAUACCUUCCCAGGUAACAAACCAACCAACUUUCGAUCUCUUGUAGAUCUGUUCUCUAAACGAACUUUAAAAUCUGUGUGGCUGUCACUCGGCUGCAUGCUUAGUGCACUCACGCAGUAUAAUUAAUAACUAAUUACUGUCGUUGACAGGACACGAGUAACUCGUCUAUCUUCUGCAGGCUGCUUACGGUUUCGUCCGUGUUGCAGCCGAUCAUCAGCACAUCUAGGUUUUGUCCGGGUGUGACCGAAAGGUAAGAUGGAGAGCCUUGUCCCUGGUUUCAACGAGAAAACACACGUCCAACUCAGUUUGCCUGUUUUACAGGUUCGCGACGUGCUCGUACGUGGCUUUGGAGACUCCGUGGAGGAGGUCUUAUCAGAGGCACGU	nan nan nan nan nan nan nan nan nan nan nan nan nan nan nan nan nan nan nan nan nan nan nan nan nan nan nan nan nan 0.135 0.253 0.033 0.148 0.012 0.272 0.14 0.226 0.223 2.2 0.63 1.262 1.709 2.604 0.355 0.0 0.25 0.002 0.065 0.352 0.261 2.09 2.606 0.258 0.926 0.119 0.0 0.25 0.007 0.31 0.0 0.099 0.183 0.306 1.25 0.058 0.569 1.243 0.251 0.528 2.325 0.585 0.248 0.088 0.164 0.0 0.386 0.966 3.61 1.419 1…	nan nan nan nan nan nan nan nan nan nan nan nan nan nan nan nan nan nan nan nan nan nan nan nan nan nan nan nan nan 0.11382799325463745 0.2133220910623946 0.02782462057335582 0.12478920741989882 0.010118043844856662 0.22934232715008435 0.11804384485666106 0.19055649241146713 0.18802698145025296 1.8549747048903882 0.5311973018549747 1.0640809443507588 1.4409780775716696 2.1956155143338956 0.299325…	[0.4296945035457611, 0.5028239488601685, 0.7758398652076721, 0.4642452597618103, 0.332066148519516, 0.21702180802822113, 0.18392693996429443, 0.14974819123744965, 0.27301740646362305, 0.3264785408973694, 0.4255879521369934, 0.6323386430740356, 0.21629269421100616, 0.18442390859127045, 0.029570337384939194, 0.05292973667383194, 0.28727972507476807, 0.49452853202819824, 0.12956970930099487, 0.10751…	[0.6159454584121704, 0.21594178676605225, 0.26034852862358093, 0.5927438735961914, 0.745142936706543, 0.7675106525421143, 0.1022353395819664, 0.08683397620916367, 0.1042143777012825, 0.141041100025177, 0.144535630941391, 0.93681401014328, 0.18285955488681793, 0.3434378504753113, 0.17724819481372833, 0.15838122367858887, 0.11264076083898544, 0.22263790667057037, 0.6947221755981445, 0.6854821443557…	31.47
Manfredonia et al.	1	478	478	Y	AUUAAAGGUUUAUACCUUCCCAGGUAACAAACCAACCAACUUUCGAUCUCUUGUAGAUCUGUUCUCUAAACGAACUUUAAAAUCUGUGUGGCUGUCACUCGGCUGCAUGCUUAGUGCACUCACGCAGUAUAAUUAAUAACUAAUUACUGUCGUUGACAGGACACGAGUAACUCGUCUAUCUUCUGCAGGCUGCUUACGGUUUCGUCCGUGUUGCAGCCGAUCAUCAGCACAUCUAGGUUUUGUCCGGGUGUGACCGAAAGGUAAGAUGGAGAGCCUUGUCCCUGGUUUCAACGAGAAAACACACGUCCAACUCAGUUUGCCUGUUUUACAGGUUCGCGACGUGCUCGUACGUGGCUUUGGAGACUCCGUGGAGGAGGUCUUAUCAGAGGCACGUCAACA…	nan nan nan nan nan nan nan nan nan nan nan nan nan nan nan nan nan nan nan nan nan nan nan nan nan nan nan nan nan 0.135 0.253 0.033 0.148 0.012 0.272 0.14 0.226 0.223 2.2 0.63 1.262 1.709 2.604 0.355 0.0 0.25 0.002 0.065 0.352 0.261 2.09 2.606 0.258 0.926 0.119 0.0 0.25 0.007 0.31 0.0 0.099 0.183 0.306 1.25 0.058 0.569 1.243 0.251 0.528 2.325 0.585 0.248 0.088 0.164 0.0 0.386 0.966 3.61 1.419 1…	nan nan nan nan nan nan nan nan nan nan nan nan nan nan nan nan nan nan nan nan nan nan nan nan nan nan nan nan nan 0.11382799325463745 0.2133220910623946 0.02782462057335582 0.12478920741989882 0.010118043844856662 0.22934232715008435 0.11804384485666106 0.19055649241146713 0.18802698145025296 1.8549747048903882 0.5311973018549747 1.0640809443507588 1.4409780775716696 2.1956155143338956 0.299325…	[0.43517035245895386, 0.4980770945549011, 0.7764750719070435, 0.47864609956741333, 0.34047651290893555, 0.21883907914161682, 0.19437743723392487, 0.1607767790555954, 0.29387158155441284, 0.35174494981765747, 0.4617893397808075, 0.6654605269432068, 0.22938662767410278, 0.19583779573440552, 0.03496725484728813, 0.060693755745887756, 0.29587656259536743, 0.46896690130233765, 0.11908555030822754, 0.1…	[0.6035009622573853, 0.20541176199913025, 0.250838965177536, 0.592892587184906, 0.7266458868980408, 0.735954761505127, 0.10114976018667221, 0.08696042746305466, 0.10736145824193954, 0.14024491608142853, 0.14998126029968262, 0.9391056299209595, 0.18115240335464478, 0.3714740574359894, 0.18986982107162476, 0.16637346148490906, 0.1138511672616005, 0.20045293867588043, 0.6228795647621155, 0.657174170…	25.94
Lan et al.	13459	13546	88	Y	GUUUUUAAACGGGUUUGCGGUGUAAGUGCAGCCCGUCUUACACCGUGCGGCACAGGCACUAGUACUGAUGUCGUAUACAGGGCUUUUG	1.465 0.177 0.048 0.039 0.463 4.005 1.98 1.515 1.699 0.395 0.0 0.0 0.0 0.049 0.0 0.279 0.0 0.0 0.0 0.0 0.019 0.0 0.101 0.039 0.129 0.0 0.095 0.137 0.073 0.028 0.0 0.0 0.0 0.113 0.035 0.099 0.043 0.275 0.872 1.035 0.785 0.485 0.207 0.158 2.273 0.546 0.66 0.543 0.0 0.0 0.074 0.0 0.022 0.327 0.186 0.111 0.173 0.417 0.885 0.194 0.099 0.104 0.255 0.291 0.157 0.109 0.381 0.705 0.072 0.008 0.053 0.269 0…	1.2352445193929176 0.14924114671163574 0.04047217537942665 0.03288364249578415 0.3903878583473862 3.376897133220911 1.669477234401349 1.2774030354131534 1.4325463743676223 0.33305227655986513 0.0 0.0 0.0 0.04131534569983137 0.0 0.2352445193929174 0.0 0.0 0.0 0.0 0.016020236087689713 0.0 0.0851602023608769 0.03288364249578415 0.10876897133220911 0.0 0.08010118043844858 0.1155143338954469 0.0615514…	[0.36601781845092773, 0.3060644567012787, 0.1285945624113083, 0.0717519223690033, 0.4848507046699524, 0.8803061246871948, 0.4608650803565979, 0.399047315120697, 0.1588381826877594, 0.2947450876235962, 0.20659488439559937, 0.1771385371685028, 0.23038291931152344, 0.7584157586097717, 0.641867458820343, 0.6089290976524353, 0.15192410349845886, 0.08073035627603531, 0.015229728072881699, 0.09868878126…	[0.12008754909038544, 0.10378024727106094, 0.22932159900665283, 0.3196163475513458, 0.3126530051231384, 0.21460846066474915, 0.33735406398773193, 0.3978477716445923, 0.3236006796360016, 0.35223299264907837, 0.0799633339047432, 0.07126558572053909, 0.16098517179489136, 0.19563990831375122, 0.1623842418193817, 0.13711383938789368, 0.2112976461648941, 0.1360202431678772, 0.07611564546823502, 0.09095…	100
Hagey et al.	28712	28776	65	N	GGCACCCGCAAUCCUGCUAACAAUGCUGCAAUCGUGCUACAACUUCCUCAAGGAACAACAUUGCC	0.0 0.0 0.049 0.177 0.07 0.043 0.058 0.0 0.016 0.024 0.102 0.074 0.005 0.03 0.271 1.022 0.121 0.254 0.205 0.835 0.245 0.475 0.517 0.054 0.0 0.018 0.04 0.066 0.391 0.079 1.567 0.595 0.721 0.523 0.263 0.716 0.033 0.335 0.99 0.139 1.36 0.558 0.499 0.299 0.216 0.004 0.022 0.119 0.074 0.144 0.244 0.0 0.0 0.032 0.047 0.04 0.071 0.214 0.652 2.935 0.022 0.064 0.0 0.0 0.0	0.0 0.0 0.04131534569983137 0.14924114671163574 0.05902192242833053 0.03625632377740303 0.048903878583473864 0.0 0.013490725126475549 0.020236087689713324 0.08600337268128162 0.06239460370994941 0.004215851602023609 0.025295109612141653 0.2284991568296796 0.8617200674536257 0.10202360876897133 0.21416526138279934 0.17284991568296795 0.7040472175379426 0.20657672849915684 0.40050590219224286 0.435…	[0.1291009932756424, 0.07901900261640549, 0.11659711599349976, 0.16540716588497162, 0.02146293967962265, 0.09713394939899445, 0.04664817079901695, 0.14082218706607819, 0.19530650973320007, 0.11279679834842682, 0.3976278603076935, 0.4500577747821808, 0.06765201687812805, 0.1321789026260376, 0.23777346312999725, 0.2689858078956604, 0.16539546847343445, 0.5097993016242981, 0.6207751631736755, 0.3476…	[0.07024142146110535, 0.09468284249305725, 0.37486228346824646, 0.4186302423477173, 0.29181772470474243, 0.38105905055999756, 0.6128147840499878, 0.12396524846553802, 0.8082298040390015, 0.5862583518028259, 0.6246803998947144, 0.12561413645744324, 0.3629213571548462, 0.287569522857666, 0.0851130411028862, 0.12475171685218811, 0.6146126389503479, 0.15753376483917236, 0.7923681735992432, 0.84162843…	0
Hagey et al.	159	282	124	N	GGACACGAGUAACUCGUCUAUCUUCUGCAGGCUGCUUACGGUUUCGUCCGUGUUGCAGCCGAUCAUCAGCACAUCUAGGUUUUGUCCGGGUGUGACCGAAAGGUAAGAUGGAGAGCCUUGUCCC	0.0 0.0 0.091 0.092 0.023 0.319 0.168 0.116 0.21 0.553 0.571 0.536 0.012 0.102 0.164 2.993 0.002 2.943 0.023 0.025 0.0 0.038 0.181 0.094 0.0 0.107 0.378 0.161 1.262 0.0 0.0 0.0 0.0 0.0 0.016 0.233 0.191 0.037 0.03 0.0 0.637 0.331 0.741 5.224 0.895 1.787 0.731 0.289 0.023 0.016 1.391 3.323 0.33 0.199 0.0 0.0 0.001 0.0 0.0 0.0 0.0 0.014 0.0 0.039 0.518 0.015 0.0 0.032 0.0 0.008 0.046 0.0 0.0 0.03 0…	0.0 0.0 0.07672849915682968 0.0775716694772344 0.0193929173693086 0.26897133220910624 0.14165261382799327 0.09780775716694773 0.17706576728499157 0.46627318718381117 0.4814502529510961 0.4519392917369309 0.010118043844856662 0.08600337268128162 0.13827993254637438 2.5236087689713322 0.0016863406408094436 2.4814502529510962 0.0193929173693086 0.021079258010118045 0.0 0.03204047217537943 0.15261382…	[0.11130582541227341, 0.06877605617046356, 0.15382766723632812, 0.1024446040391922, 0.13013899326324463, 0.38539740443229675, 0.34897637367248535, 0.416269451379776, 0.4439067840576172, 0.8453150391578674, 0.8721123337745667, 0.4888766407966614, 0.13415473699569702, 0.14658962190151215, 0.1785750538110733, 1.0028083324432373, 0.4604591131210327, 0.45984864234924316, 0.06036544218659401, 0.1140156…	[0.09642388671636581, 0.08867370337247849, 0.35600581765174866, 0.5690677165985107, 0.5733005404472351, 1.001423954963684, 0.13988393545150757, 0.7325766682624817, 0.18794690072536469, 0.3327263593673706, 1.0039634704589844, 1.0042552947998047, 0.2118130773305893, 0.053967684507369995, 0.16092051565647125, 0.3247246742248535, 0.20933577418327332, 0.10944318026304245, 0.06305129826068878, 0.239209…	100
Wacker et al.	45	75	31	N	GAUCUCUUGUAGAUCUGUUCUCUAAACGAAC	0.0 0.25 0.002 0.065 0.352 0.261 2.09 2.606 0.258 0.926 0.119 0.0 0.25 0.007 0.31 0.0 0.099 0.183 0.306 1.25 0.058 0.569 1.243 0.251 0.528 2.325 0.585 0.248 0.088 0.164 0.0	0.0 0.21079258010118046 0.0016863406408094436 0.05480607082630692 0.29679595278246207 0.2200674536256324 1.7622259696458684 2.1973018549747048 0.21753794266441823 0.7807757166947724 0.10033726812816189 0.0 0.21079258010118046 0.005902192242833053 0.26138279932546377 0.0 0.08347386172006746 0.1543001686340641 0.2580101180438449 1.0539629005059021 0.048903878583473864 0.47976391231028664 1.04806070…	[0.07911630719900131, 0.10669293999671936, 0.045975834131240845, 0.02435777708888054, 0.01078280434012413, 0.16439852118492126, 0.4798925518989563, 0.98502117395401, 0.657228946685791, 0.7616972923278809, 0.18370920419692993, 0.009589966386556625, 0.08677534013986588, 0.04512152075767517, 0.1346396952867508, 0.09019133448600769, 0.16532155871391296, 0.17081016302108765, 0.09662720561027527, 0.170…	[0.03161667287349701, 0.1591263711452484, 0.04304993152618408, 0.047006845474243164, 0.06278717517852783, 0.7161165475845337, 0.3299407362937927, 0.4179552495479584, 0.20014935731887817, 0.2665632963180542, 0.1685647964477539, 0.03546139597892761, 0.13879039883613586, 0.05493336170911789, 0.143614262342453, 0.1799728125333786, 0.04072268307209015, 0.04262971878051758, 0.03667530417442322, 0.23035…	100
Wacker et al.	86	125	40	N	GUGUGGCUGUCACUCGGCUGCAUGCUUAGUGCACUCACGC	0.0 0.046 0.0 0.023 0.0 0.0 0.087 0.048 0.171 1.237 0.013 0.083 0.009 0.031 0.008 0.0 0.0 0.072 1.363 2.677 0.579 0.377 0.062 0.0 0.066 0.016 0.0 0.018 0.0 0.005 0.0 0.008 0.018 0.025 0.1 0.0 0.0 0.0 0.0 0.0	0.0 0.0387858347386172 0.0 0.0193929173693086 0.0 0.0 0.0733558178752108 0.04047217537942665 0.14418212478920744 1.043001686340641 0.010961214165261383 0.06998313659359191 0.007588532883642495 0.026138279932546374 0.0067453625632377745 0.0 0.0 0.06070826306913996 1.1492411467116357 2.2571669477234404 0.4881956155143339 0.31787521079258013 0.05227655986509275 0.0 0.05564924114671164 0.013490725126…	[0.10161225497722626, 0.2575116455554962, 0.09116500616073608, 0.17284385859966278, 0.4033448100090027, 0.27000361680984497, 0.4966874122619629, 0.4191349744796753, 0.5955220460891724, 0.9901467561721802, 0.1616174876689911, 0.11176195740699768, 0.2245493233203888, 0.18619738519191742, 0.13184425234794617, 0.20316679775714874, 0.04377741739153862, 0.22335779666900635, 0.8237364292144775, 0.587105…	[0.24416998028755188, 0.07219576835632324, 0.19873644411563873, 0.03995165228843689, 0.06282534450292587, 0.07192792743444443, 0.9503883719444275, 0.1027243435382843, 0.11592014133930206, 0.49204587936401367, 0.39981958270072937, 0.3895149230957031, 0.403037965297699, 0.21459391713142395, 0.7668204307556152, 0.09249851852655411, 0.07389838993549347, 0.18818478286266327, 0.23126894235610962, 0.446…	100
Wacker et al.	302	343	42	N	CACGUCCAACUCAGUUUGCCUGUUUUACAGGUUCGCGACGUG	0.0 0.04 0.149 0.0 0.0 0.096 0.195 0.496 1.056 2.391 1.151 2.078 1.006 0.678 0.04 0.06 1.032 0.784 0.002 0.044 0.282 0.882 0.084 0.705 0.235 3.545 0.6 0.025 0.056 0.0 0.203 0.514 0.221 0.234 0.051 0.228 0.0 0.039 0.0 0.0 0.017 0.0	0.0 0.033726812816188875 0.12563237774030353 0.0 0.0 0.0809443507588533 0.16441821247892074 0.418212478920742 0.8903878583473862 2.01602023608769 0.9704890387858348 1.7521079258010117 0.8482293423271501 0.5716694772344014 0.033726812816188875 0.050590219224283306 0.8701517706576729 0.6610455311973019 0.0016863406408094436 0.03709949409780776 0.23777403035413153 0.7436762225969646 0.07082630691399…	[0.03080841526389122, 0.005808472633361816, 0.02518070489168167, 0.019521746784448624, 0.017001640051603317, 0.026735961437225342, 0.05605984851717949, 0.4515385925769806, 0.34719228744506836, 0.6592656373977661, 0.5250932574272156, 0.6881967782974243, 0.7324166297912598, 0.5372103452682495, 0.7358657717704773, 0.7875875234603882, 0.6949280500411987, 0.39613404870033264, 0.030374698340892792, 0.0…	[0.0643974170088768, 0.11456714570522308, 0.05765362083911896, 0.0711037814617157, 0.025947481393814087, 0.061405688524246216, 0.5850945711135864, 0.6367272138595581, 0.5589290857315063, 0.853406548500061, 0.42946258187294006, 0.9876810908317566, 0.9987825751304626, 0.1495192050933838, 0.2202787697315216, 0.1555176079273224, 0.20819738507270813, 0.1678539365530014, 0.09214705973863602, 0.02358676…	100
Wacker et al.	349	394	46	N	ACGUGGCUUUGGAGACUCCGUGGAGGAGGUCUUAUCAGAGGCACGU	0.065 0.007 0.0 0.028 0.0 0.144 0.024 0.0 0.0 0.078 0.0 0.0 0.023 0.0 0.045 0.033 0.0 0.061 0.093 0.39 1.492 0.269 1.569 1.145 0.033 0.0 0.087 0.032 0.349 0.194 0.021 0.249 0.999 1.383 0.246 0.022 0.034 0.0 0.026 0.0 0.0 0.033 0.004 0.071 0.0 0.035	0.05480607082630692 0.005902192242833053 0.0 0.02360876897133221 0.0 0.12141652613827993 0.020236087689713324 0.0 0.0 0.0657672849915683 0.0 0.0 0.0193929173693086 0.0 0.03794266441821248 0.02782462057335582 0.0 0.05143338954468803 0.07841483979763912 0.3288364249578415 1.258010118043845 0.22681281618887017 1.3229342327150084 0.9654300168634065 0.02782462057335582 0.0 0.0733558178752108 0.0269814…	[0.028709139674901962, 0.0392010435461998, 0.024411145597696304, 0.055438484996557236, 0.2266780436038971, 0.5750622749328613, 0.3264237940311432, 0.2278059720993042, 0.1946839541196823, 0.140965074300766, 0.07307828962802887, 0.09321898221969604, 0.1019221842288971, 0.03774527460336685, 0.05659153312444687, 0.025083128362894058, 0.01610960066318512, 0.02222782000899315, 0.025683145970106125, 0.6…	[0.27284541726112366, 0.09368100762367249, 0.14533719420433044, 0.0279262512922287, 0.2032870650291443, 0.21620431542396545, 0.11957939714193344, 0.03425063192844391, 0.045916929841041565, 0.026329442858695984, 0.11143337935209274, 0.09407799690961838, 0.49655425548553467, 0.04526001214981079, 0.5254206657409668, 0.0808480903506279, 0.038789331912994385, 0.04258523881435394, 0.10027628391981125, …	100
Wacker et al.	413	471	59	Y	ACUUGUGGCUUAGUAGAAGUUGAAAAAGGCGUUUUGCCUCAACUUGAACAGCCCUAUGU	0.081 0.013 0.356 0.188 0.214 2.013 0.979 0.0 0.0 0.0 0.0 0.0 0.0 0.0 0.216 2.859 2.236 0.044 0.028 0.017 0.113 0.916 0.29 0.456 0.143 0.132 2.589 0.0 0.008 0.599 1.62 0.577 0.251 0.104 4.452 0.0 0.0 0.045 0.32 0.04 0.0 0.015 0.006 0.0 0.018 0.0 0.044 0.0 0.001 0.048 0.0 0.0 0.115 0.076 0.224 0.613 0.17 0.0 0.006	0.06829679595278247 0.010961214165261383 0.30016863406408095 0.15851602023608768 0.18043844856661045 1.697301854974705 0.8254637436762227 0.0 0.0 0.0 0.0 0.0 0.0 0.0 0.1821247892074199 2.4106239460370995 1.885328836424958 0.03709949409780776 0.02360876897133221 0.014333895446880272 0.09527824620573357 0.7723440134907252 0.2445193929173693 0.38448566610455315 0.1205733558178752 0.11129848229342328…	[0.2665104269981384, 0.23606610298156738, 0.4238624572753906, 0.6625296473503113, 0.7494359612464905, 0.854919970035553, 0.3409966230392456, 0.012068405747413635, 0.06075693294405937, 0.214840829372406, 0.18898163735866547, 0.167596697807312, 0.1294381469488144, 0.3714725971221924, 0.43825116753578186, 0.3272658586502075, 0.5171540975570679, 0.03959503769874573, 0.02034645900130272, 0.05873726308…	[0.27379167079925537, 0.3351041078567505, 0.21485042572021484, 0.1633615791797638, 0.17029662430286407, 0.4914637804031372, 0.15973114967346191, 0.08734166622161865, 0.08277201652526855, 0.04361334443092346, 0.12374704331159592, 0.9676448702812195, 0.20546123385429382, 0.1543487310409546, 0.8641458749771118, 0.09839016199111938, 0.1913381814956665, 0.11301719397306442, 0.03644862771034241, 0.0111…	100
Wacker et al.	29548	29613	66	N	CACAAGGCAGAUGGGCUAUAUAAACGUUUUCGCUUUUCCGUUUACGAUAUAUAGUCUACUCUUGUG	0.212 0.143 0.04 0.389 0.084 0.0 0.095 0.152 0.1 0.239 1.519 1.482 0.0 0.0 0.0 0.08 0.013 0.011 0.011 0.035 0.059 0.236 2.793 1.464 0.034 0.0 0.007 0.013 0.02 0.318 0.249 0.438 0.764 1.376 0.864 0.149 3.257 0.208 0.155 0.066 0.0 0.0 0.245 0.072 0.028 0.0 0.0 0.004 0.015 0.0 0.001 0.013 0.251 0.0 0.0 0.047 0.221 0.583 0.036 0.192 0.014 0.114 0.063 0.0 0.075 0.097	0.178752107925801 0.1205733558178752 0.033726812816188875 0.3279932546374368 0.07082630691399663 0.0 0.08010118043844858 0.1281618887015177 0.08431703204047218 0.2015177065767285 1.2807757166947724 1.2495784148397977 0.0 0.0 0.0 0.06745362563237775 0.010961214165261383 0.00927487352445194 0.00927487352445194 0.029510961214165264 0.049747048903878585 0.19898819561551434 2.354974704890388 1.2344013…	[0.07462483644485474, 0.00566159188747406, 0.048546355217695236, 0.014175314456224442, 0.09607656300067902, 0.0874171108007431, 0.19064849615097046, 0.6366078853607178, 0.6182178258895874, 0.4274114668369293, 0.586316704750061, 0.2943609058856964, 0.13847188651561737, 0.02284158766269684, 0.05958274379372597, 0.03295762091875076, 0.07980675995349884, 0.022884104400873184, 0.0054745152592659, 0.01…	[0.09877824038267136, 0.09751537442207336, 0.08350124955177307, 0.09848081320524216, 0.14000070095062256, 0.04154111444950104, 0.10909522324800491, 1.0033135414123535, 0.8784961700439453, 0.18474943935871124, 0.7746667265892029, 0.1179874911904335, 0.11923257261514664, 0.10149616748094559, 0.0736876055598259, 0.09253795444965363, 0.038062840700149536, 0.0604952871799469, 0.03609558939933777, 0.10…	100
Wacker et al.	29630	29656	27	Y	AACUACAUAGCACAAGUAGAUGUAGUU	0.0 0.043 0.003 0.055 0.01 0.038 0.191 0.223 0.219 0.406 0.632 0.567 0.227 1.914 0.959 0.44 0.523 0.551 2.669 0.145 0.021 0.0 0.0 0.0 0.0 0.023 0.151	0.0 0.03625632377740303 0.0025295109612141656 0.0463743676222597 0.008431703204047219 0.03204047217537943 0.16104553119730186 0.18802698145025296 0.18465430016863407 0.3423271500843171 0.5328836424957841 0.47807757166947723 0.19139966273187187 1.6138279932546375 0.8086003372681282 0.3709949409780776 0.4409780775716695 0.46458684654300175 2.2504215851602023 0.12225969645868465 0.01770657672849916 …	[0.1322191208600998, 0.013267982751131058, 0.006904486566781998, 0.009766951203346252, 0.011442925781011581, 0.009863149374723434, 0.11668650060892105, 0.10480862855911255, 0.1756320297718048, 0.3760060966014862, 0.956906259059906, 0.2082313895225525, 0.8527520895004272, 0.5071147680282593, 0.9889901280403137, 0.8992825150489807, 0.990027129650116, 0.957297682762146, 0.273322194814682, 0.23746562…	[0.19947549700737, 0.10269317030906677, 0.0472511351108551, 0.049530237913131714, 0.06810715794563293, 0.05263383686542511, 0.07050587981939316, 0.09550609439611435, 0.9706206917762756, 0.1944340467453003, 0.9793037176132202, 1.0010801553726196, 1.003130555152893, 0.9559135437011719, 0.8221228718757629, 0.17923489212989807, 0.29530370235443115, 0.9004130363464355, 0.1350315362215042, 0.1103639826…	100
Wacker et al.	29728	29768	41	N	UUCACCGAGGCCACGCGGAGUACGAUCGAGUGUACAGUGAA	0.019 0.07 0.015 0.012 0.018 0.09 0.471 1.143 0.074 0.004 0.038 0.148 0.331 0.216 1.619 0.219 0.211 0.828 1.853 0.641 0.665 1.274 0.59 1.25 6.076 1.83 0.143 0.0 0.375 0.631 1.516 0.0 0.445 0.21 0.042 0.028 0.0 0.025 0.0 0.026 0.055	0.016020236087689713 0.05902192242833053 0.012647554806070826 0.010118043844856662 0.01517706576728499 0.07588532883642496 0.3971332209106239 0.963743676222597 0.06239460370994941 0.0033726812816188873 0.03204047217537943 0.12478920741989882 0.27908937605396295 0.1821247892074199 1.3650927487352447 0.18465430016863407 0.1779089376053963 0.6981450252951096 1.5623946037099494 0.5404721753794267 0.5…	[0.3276800215244293, 0.311406672000885, 0.058862410485744476, 0.1811167299747467, 0.06941112130880356, 0.058048322796821594, 0.06588897854089737, 0.20319175720214844, 0.1653444468975067, 0.16249199211597443, 0.25840094685554504, 0.059834074229002, 0.13459160923957825, 0.11039192229509354, 0.18147459626197815, 0.10463547706604004, 0.09837432205677032, 0.2744056284427643, 0.3275180160999298, 0.3772…	[0.09042827785015106, 0.06853180378675461, 0.1481514275074005, 0.25026461482048035, 0.10515160858631134, 0.14897671341896057, 0.11218438297510147, 0.9718062877655029, 0.051428020000457764, 0.08248677849769592, 0.7351124286651611, 0.22950556874275208, 0.21113252639770508, 0.22721099853515625, 0.2719966173171997, 0.1853102296590805, 0.059674620628356934, 0.09496190398931503, 1.0026743412017822, 0.1…	97.56
Wacker et al.	7	125	119	N	GGUUUAUACCUUCCCAGGUAACAAACCAACCAACUUUCGAUCUCUUGUAGAUCUGUUCUCUAAACGAACUUUAAAAUCUGUGUGGCUGUCACUCGGCUGCAUGCUUAGUGCACUCACGC	nan nan nan nan nan nan nan nan nan nan nan nan nan nan nan nan nan nan nan nan nan nan nan 0.135 0.253 0.033 0.148 0.012 0.272 0.14 0.226 0.223 2.2 0.63 1.262 1.709 2.604 0.355 0.0 0.25 0.002 0.065 0.352 0.261 2.09 2.606 0.258 0.926 0.119 0.0 0.25 0.007 0.31 0.0 0.099 0.183 0.306 1.25 0.058 0.569 1.243 0.251 0.528 2.325 0.585 0.248 0.088 0.164 0.0 0.386 0.966 3.61 1.419 1.712 0.464 2.518 0.121 0…	nan nan nan nan nan nan nan nan nan nan nan nan nan nan nan nan nan nan nan nan nan nan nan 0.11382799325463745 0.2133220910623946 0.02782462057335582 0.12478920741989882 0.010118043844856662 0.22934232715008435 0.11804384485666106 0.19055649241146713 0.18802698145025296 1.8549747048903882 0.5311973018549747 1.0640809443507588 1.4409780775716696 2.1956155143338956 0.29932546374367625 0.0 0.210792…	[0.0048009976744651794, 0.07524290680885315, 0.09407087415456772, 0.09870493412017822, 0.14126141369342804, 0.37462174892425537, 0.10288669914007187, 0.07546193897724152, 0.006657589226961136, 0.042441606521606445, 0.5527697801589966, 0.9145649671554565, 0.38909876346588135, 0.29215747117996216, 0.23389142751693726, 0.15388044714927673, 0.10664325952529907, 0.05804355442523956, 0.233960822224617,…	[0.10602854937314987, 0.06700272858142853, 0.022388070821762085, 0.04375288635492325, 0.05290193855762482, 0.8076030015945435, 0.08190400153398514, 0.17630210518836975, 0.10857954621315002, 0.07358022034168243, 0.11463344097137451, 0.24405431747436523, 0.8311032652854919, 0.8685086965560913, 0.8608084321022034, 0.8089451789855957, 0.044955939054489136, 0.06327472627162933, 0.10163836181163788, 0.…	87.39
Wacker et al.	29698	29806	109	N	UUAGGGAGGACUUGAAAGAGCCACCACAUUUUCACCGAGGCCACGCGGAGUACGAUCGAGUGUACAGUGAACAAUGCUAGGGAGAGCUGCCUAUAUGGAAGAGCCCUAA	0.008 0.012 0.017 0.001 0.007 0.0 1.438 0.362 0.569 0.987 0.42 0.491 0.49 0.413 0.329 0.133 0.767 0.481 0.223 0.0 0.006 0.004 0.093 0.012 0.022 0.442 0.039 0.027 0.012 0.02 0.019 0.07 0.015 0.012 0.018 0.09 0.471 1.143 0.074 0.004 0.038 0.148 0.331 0.216 1.619 0.219 0.211 0.828 1.853 0.641 0.665 1.274 0.59 1.25 6.076 1.83 0.143 0.0 0.375 0.631 1.516 0.0 0.445 0.21 0.042 0.028 0.0 0.025 0.0 0.026 …	0.0067453625632377745 0.010118043844856662 0.014333895446880272 0.0008431703204047218 0.005902192242833053 0.0 1.21247892074199 0.3052276559865093 0.47976391231028664 0.8322091062394604 0.35413153456998314 0.4139966273187184 0.4131534569983137 0.3482293423271501 0.2774030354131535 0.11214165261382801 0.6467116357504217 0.40556492411467115 0.18802698145025296 0.0 0.005059021922428331 0.00337268128…	[0.13026446104049683, 0.17800390720367432, 0.10750927031040192, 0.048013798892498016, 0.15975584089756012, 0.10726551711559296, 0.4060007929801941, 0.40537986159324646, 0.37514400482177734, 0.5602005124092102, 0.28858327865600586, 0.4944305121898651, 0.6179197430610657, 0.404446005821228, 0.2865736484527588, 0.6291589736938477, 0.2789687514305115, 0.45711731910705566, 0.15842196345329285, 0.11862…	[0.04811902344226837, 0.05785764753818512, 0.25773245096206665, 0.05064006149768829, 0.06146650016307831, 0.13476505875587463, 0.8462069034576416, 0.20727282762527466, 0.11590832471847534, 0.8308154344558716, 0.3404518961906433, 0.11867883056402206, 0.15833333134651184, 0.10612043738365173, 0.5917469263076782, 0.6653369069099426, 0.7621608972549438, 0.08148736506700516, 0.47024086117744446, 0.109…	90.83
Yang et al.	3112	3325	214	Y	UGGUACUGAAGAUGAUUACCAAGGUAAACCUUUGGAAUUUGGUGCCACUUCUGCUGCUCUUCAACCUGAAGAAGAGCAAGAAGAAGAUUGGUUAGAUGAUGAUAGUCAACAAACUGUUGGUCAACAAGACGGCAGUGAGGACAAUCAGACAACUACUAUUCAAACAAUUGUUGAGGUUCAACCUCAAUUAGAGAUGGAACUUACACCAGUUGUU	1.009 0.123 0.099 0.135 0.304 0.201 0.266 0.634 0.854 1.009 1.11 1.758 2.525 0.0 0.523 0.259 0.208 1.31 0.07 0.125 0.051 0.095 0.0 0.0 0.288 0.173 0.211 2.3 0.023 0.026 0.149 0.17 0.385 0.0 0.364 0.513 0.525 0.489 0.216 1.198 0.118 0.071 1.366 0.0 0.007 0.018 0.283 0.056 0.063 0.003 0.013 0.097 1.301 0.056 0.013 0.0 0.083 0.021 0.007 0.039 0.046 0.104 0.548 1.392 0.059 0.226 0.222 0.047 0.297 0.8…	0.8507588532883642 0.10370994940978077 0.08347386172006746 0.11382799325463745 0.2563237774030354 0.1694772344013491 0.22428330522765602 0.5345699831365937 0.7200674536256324 0.8507588532883642 0.9359190556492413 1.4822934232715008 2.1290050590219223 0.0 0.4409780775716695 0.21838111298482296 0.17537942664418213 1.1045531197301857 0.05902192242833053 0.10539629005059023 0.04300168634064081 0.0801…	[0.2534259557723999, 0.0267309732735157, 0.04119148105382919, 0.17231260240077972, 0.09530104696750641, 0.08612951636314392, 0.20740646123886108, 0.22767165303230286, 0.1894168257713318, 0.6011813282966614, 0.5613733530044556, 0.6037996411323547, 0.7182080149650574, 0.6109638810157776, 0.4273330867290497, 0.7833914756774902, 0.831676721572876, 0.6047326326370239, 0.04440817981958389, 0.0326687805…	[0.05902525782585144, 0.08769040554761887, 0.1398288905620575, 0.045304566621780396, 0.14061665534973145, 0.15641161799430847, 0.07885360717773438, 0.10757248103618622, 0.3660634756088257, 0.5456250905990601, 0.18975624442100525, 0.9274334907531738, 0.41776737570762634, 0.3585880994796753, 0.935543417930603, 0.22834579646587372, 0.270719051361084, 0.9379404187202454, 0.10189832746982574, 0.130280…	50.47
Yang et al.	4484	4634	151	Y	AAGGGUAUUAAAAUACAAGAGGGUGUGGUUGAUUAUGGUGCUAGAUUUUACUUUUACACCAGUAAAACAACUGUAGCGUCACUUAUCAACACACUUAACGAUCUAAAUGAAACUCUUGUUACAAUGCCACUUGGCUAUGUAACACAUGGCU	1.395 0.903 0.0 0.0 0.0 0.016 0.069 0.059 1.239 0.61 0.745 0.272 1.418 2.791 0.483 0.101 0.071 0.149 0.0 0.362 0.181 0.514 0.0 0.14 0.0 0.464 0.61 3.961 0.235 0.236 0.0 0.039 0.009 0.448 0.192 0.308 0.0 0.0 0.07 0.0 0.012 0.071 0.651 0.219 1.761 0.025 0.058 0.04 0.458 0.293 0.166 0.326 0.449 0.151 1.26 0.717 0.63 1.053 1.077 0.639 0.335 0.0 0.102 0.039 0.112 0.104 0.298 0.498 0.255 0.983 0.996 1.…	1.176222596964587 0.7613827993254638 0.0 0.0 0.0 0.013490725126475549 0.05817875210792581 0.049747048903878585 1.0446880269814505 0.5143338954468802 0.6281618887015177 0.22934232715008435 1.1956155143338953 2.3532883642495785 0.4072512647554806 0.0851602023608769 0.05986509274873524 0.12563237774030353 0.0 0.3052276559865093 0.15261382799325465 0.43338954468802704 0.0 0.11804384485666106 0.0 0.39…	[0.2272023856639862, 0.16423968970775604, 0.176701620221138, 0.005771458148956299, 0.03914577513933182, 0.10709794610738754, 0.06571944057941437, 0.10993073135614395, 0.286823034286499, 0.16720902919769287, 0.24869613349437714, 0.4708326756954193, 0.1499287486076355, 0.8143215775489807, 0.0373828187584877, 0.0358443409204483, 0.010454632341861725, 0.012304045259952545, 0.038311637938022614, 0.098…	[0.48560547828674316, 0.38810425996780396, 0.06667125225067139, 0.07746146619319916, 0.09614459425210953, 0.11652874201536179, 0.146332785487175, 0.05557790398597717, 0.056226179003715515, 0.7802689075469971, 0.9171877503395081, 0.8921797275543213, 0.6722468137741089, 0.25577110052108765, 0.2672029733657837, 0.17346155643463135, 0.141147643327713, 0.14877960085868835, 0.07972361147403717, 0.31777…	68.21
Yang et al.	6115	6311	197	Y	UGCUUCAAGAGAGCUUAAAGUUACAUUUUUCCCUGACUUAAAUGGUGAUGUGGUGGCUAUUGAUUAUAAACACUACACACCCUCUUUUAAGAAAGGAGCUAAAUUGUUACAUAAACCUAUUGUUUGGCAUGUUAACAAUGCAACUAAUAAAGCCACGUAUAAACCAAAUACCUGGUGUAUACGUUGUCUUUGGAGCA	0.081 0.0 0.0 0.037 0.02 0.09 0.043 0.08 0.363 0.141 0.0 0.513 0.38 0.0 0.139 0.419 0.207 0.144 1.119 0.0 0.039 0.187 0.522 0.334 1.9 0.508 0.27 0.025 0.44 3.909 0.067 0.032 0.124 0.058 0.085 0.335 0.087 0.121 0.294 0.7 0.974 5.818 0.839 0.0 0.11 0.31 0.07 3.689 0.052 0.0 0.0 0.0 0.0 0.006 0.0 0.0 0.027 0.127 0.573 0.725 0.593 0.933 0.149 0.011 0.557 0.151 0.181 0.105 0.052 0.006 0.0 0.043 0.011 …	0.06829679595278247 0.0 0.0 0.031197301854974706 0.016863406408094438 0.07588532883642496 0.03625632377740303 0.06745362563237775 0.306070826306914 0.11888701517706576 0.0 0.4325463743676223 0.3204047217537943 0.0 0.11720067453625634 0.35328836424957843 0.1745362563237774 0.12141652613827993 0.9435075885328836 0.0 0.03288364249578415 0.15767284991568298 0.4401349072512648 0.2816188870151771 1.602…	[0.13002324104309082, 0.06927397102117538, 0.08243722468614578, 0.06489095091819763, 0.11310338973999023, 0.03558627516031265, 0.12714120745658875, 0.4989975392818451, 0.21123401820659637, 0.07038912177085876, 0.04577111452817917, 0.22198094427585602, 0.3637802302837372, 0.288539320230484, 0.39568743109703064, 0.5585220456123352, 0.6825716495513916, 0.5893071293830872, 0.34688639640808105, 0.2199…	[0.06125475466251373, 0.14049923419952393, 0.20259156823158264, 0.04604947566986084, 0.0766545832157135, 0.19527092576026917, 0.25421154499053955, 0.285799503326416, 0.10382594913244247, 0.7767825126647949, 0.16029265522956848, 1.0039886236190796, 0.14257067441940308, 0.5231732726097107, 0.08817418664693832, 0.1362711787223816, 0.8362975120544434, 1.0009562969207764, 0.6399655342102051, 0.1043476…	54.31
Yang et al.	11381	11536	156	Y	AGGAGAGUGUGGACACUUAUGAAUGUCUUGACACUCGUUUAUAAAGUUUAUUAUGGUAAUGCUUUAGAUCAAGCCAUUUCCAUGUGGGCUCUUAUAAUCUCUGUUACUUCUAACUACUCAGGUGUAGUUACAACUGUCAUGUUUUUGGCCAGAGGU	0.702 0.25 0.638 1.52 0.362 0.23 0.838 0.175 0.0 0.25 0.0 0.0 0.061 0.028 0.189 0.242 0.892 0.574 1.628 1.171 3.174 2.069 1.067 0.138 0.03 0.052 0.13 0.703 0.752 0.176 0.021 0.035 0.046 0.143 0.088 0.094 0.356 0.033 0.155 0.261 2.472 0.455 0.365 0.511 0.257 0.694 0.095 0.155 1.602 2.025 0.882 0.899 0.862 0.712 0.059 0.287 0.307 0.1 0.578 0.311 0.029 0.107 0.315 0.368 0.672 1.305 0.834 1.375 0.839…	0.5919055649241146 0.21079258010118046 0.5379426644182125 1.2816188870151772 0.3052276559865093 0.19392917369308602 0.7065767284991569 0.1475548060708263 0.0 0.21079258010118046 0.0 0.0 0.05143338954468803 0.02360876897133221 0.15935919055649242 0.20404721753794267 0.7521079258010118 0.4839797639123103 1.372681281618887 0.9873524451939293 2.6762225969645868 1.7445193929173695 0.8996627318718381 0…	[0.2952496409416199, 0.39597463607788086, 0.359750360250473, 0.3722165524959564, 0.0330074205994606, 0.0475594624876976, 0.1220645010471344, 0.08304796367883682, 0.01888338103890419, 0.09143151342868805, 0.11409836262464523, 0.1012519896030426, 0.05802447721362114, 0.031786758452653885, 0.09313346445560455, 0.41751062870025635, 0.983568012714386, 0.9745198488235474, 0.9273752570152283, 0.85345387…	[0.7168048620223999, 0.09647525101900101, 0.14361417293548584, 0.9821561574935913, 0.08448243141174316, 0.18629851937294006, 0.10385797917842865, 0.03548738360404968, 0.17718206346035004, 0.061343222856521606, 0.14758539199829102, 0.075416699051857, 0.13564959168434143, 0.10231342166662216, 0.2014433592557907, 0.9588805437088013, 0.23973022401332855, 0.43233370780944824, 0.9625343680381775, 0.406…	72.44
Yang et al.	13634	13801	168	Y	UAAUUGAUUCUUACUUUGUAGUUAAGAGACACACUUUCUCUAACUACCAACAUGAAGAAACAAUUUAUAAUUUACUUAAGGAUUGUCCAGCUGUUGCUAAACAUGACUUCUUUAAGUUUAGAAUAGACGGUGACAUGGUACCACAUAUAUCACGUCAACGUCUUACUA	2.979 0.499 0.331 0.0 0.128 0.218 0.405 0.0 0.027 0.033 0.136 0.174 2.239 0.198 0.143 0.425 0.986 0.0 0.0 0.008 0.0 0.0 0.07 2.529 3.079 0.0 0.012 0.003 0.0 1.692 0.068 0.079 0.838 2.448 0.452 0.985 2.324 0.0 0.0 0.0 0.025 0.0 0.1 0.025 0.0 0.0 0.08 0.0 0.276 0.918 0.124 1.69 1.144 0.28 0.054 0.087 0.055 0.036 0.133 0.129 0.05 0.022 0.301 0.066 0.73 1.035 2.539 0.419 1.537 2.049 0.507 0.934 2.011…	2.511804384485666 0.42074198988195616 0.27908937605396295 0.0 0.10792580101180439 0.18381112984822934 0.34148397976391237 0.0 0.022765598650927487 0.02782462057335582 0.11467116357504217 0.1467116357504216 1.887858347386172 0.16694772344013492 0.1205733558178752 0.35834738617200673 0.8313659359190557 0.0 0.0 0.0067453625632377745 0.0 0.0 0.05902192242833053 2.1323777403035415 2.5961214165261386 0…	[0.48370498418807983, 0.1409570872783661, 0.11768105626106262, 0.08133959770202637, 0.045302510261535645, 0.1094176173210144, 0.17645759880542755, 0.13855522871017456, 0.07176267355680466, 0.01899774745106697, 0.05498453229665756, 0.1458929181098938, 0.4857311248779297, 0.17630314826965332, 0.31073227524757385, 0.2453596293926239, 0.1820037066936493, 0.05578378215432167, 0.016006596386432648, 0.0…	[0.1340298354625702, 0.1745363026857376, 0.08643919974565506, 0.03935137391090393, 0.022327125072479248, 0.0567229688167572, 1.0007084608078003, 0.047016724944114685, 0.03189025819301605, 0.04058524966239929, 0.031999439001083374, 0.06647392362356186, 0.8249265551567078, 0.8495122790336609, 0.16465839743614197, 0.11842149496078491, 0.220021590590477, 0.06863586604595184, 0.058887362480163574, 0.1…	64.88
Yang et al.	17048	17232	185	Y	AGGUUGGUAUGCAAAAGUAUUCUACACUCCAGGGACCACCUGGUACUGGUAAGAGUCAUUUUGCUAUUGGCCUAGCUCUCUACUACCCUUCUGCUCGCAUAGUGUAUACAGCUUGCUCUCAUGCCGCUGUUGAUGCACUAUGUGAGAAGGCAUUAAAAUAUUUGCCUAUAGAUAAAUGUAGUAGA	0.942 0.0 0.0 0.028 0.132 0.0 0.0 0.073 0.196 0.24 0.0 0.017 0.0 0.002 0.003 0.146 0.0 0.059 0.31 0.049 0.053 0.04 0.034 0.321 0.099 0.225 0.406 0.091 0.0 0.049 0.079 0.441 1.108 2.04 3.658 0.304 0.432 1.242 0.451 1.055 0.15 0.0 0.014 0.14 0.672 0.345 0.353 0.148 0.55 0.363 0.285 0.578 0.0 0.019 0.0 0.002 0.751 1.711 0.053 0.033 0.007 0.136 0.0 0.001 0.045 0.102 0.094 0.111 0.0 0.0 0.012 0.067 0.…	0.7942664418212478 0.0 0.0 0.02360876897133221 0.11129848229342328 0.0 0.0 0.061551433389544684 0.16526138279932548 0.20236087689713322 0.0 0.014333895446880272 0.0 0.0016863406408094436 0.0025295109612141656 0.12310286677908937 0.0 0.049747048903878585 0.26138279932546377 0.04131534569983137 0.04468802698145025 0.033726812816188875 0.028667790893760543 0.2706576728499157 0.08347386172006746 0.18…	[0.10073687136173248, 0.08641046285629272, 0.08381623029708862, 0.12033556401729584, 0.157786026597023, 0.15185821056365967, 0.1265536993741989, 0.28728386759757996, 0.2190391570329666, 0.9838699698448181, 0.15904438495635986, 0.055379848927259445, 0.014529280364513397, 0.011070288717746735, 0.021313801407814026, 0.05882466584444046, 0.18946871161460876, 0.6073395013809204, 0.29169872403144836, 0…	[0.27700331807136536, 0.05801796913146973, 0.13167664408683777, 0.10527066141366959, 0.1191372275352478, 0.09230251610279083, 0.13031885027885437, 0.06874772161245346, 0.1950257569551468, 0.5387891530990601, 0.11598138511180878, 0.14448702335357666, 0.10781509429216385, 0.11051850765943527, 0.13720765709877014, 0.2877439260482788, 0.10207799822092056, 0.3186105489730835, 0.23163187503814697, 0.10…	58.92
Yang et al.	18336	18563	228	Y	AGCUGUUGGUACCAAUUUACCUUUACAGCUAGGUUUUUCUACAGGUGUUAACCUAGUUGCUGUACCUACAGGUUAUGUUGAUACACCUAAUAAUACAGAUUUUUCCAGAGUUAGUGCUAAACCACCGCCUGGAGAUCAAUUUAAACACCUCAUACCACUUAUGUACAAAGGACUUCCUUGGAAUGUAGUGCGUAUAAAGAUUGUACAAAUGUUAAGUGACACACUUAA	0.953 0.08 0.067 0.101 0.0 0.577 0.316 0.0 0.0 0.064 0.266 0.048 0.321 0.109 0.381 0.511 0.222 2.136 1.336 0.179 0.513 0.885 1.035 2.079 0.844 0.024 0.03 0.0 0.035 0.053 0.038 0.0 0.239 0.063 0.081 0.035 0.029 0.8 0.169 0.172 0.917 0.091 0.466 0.0 0.0 0.197 0.0 0.175 0.105 0.02 0.034 0.0 0.018 0.0 0.023 0.0 0.03 0.313 0.236 0.604 0.177 0.057 0.174 0.392 0.033 0.092 0.191 0.545 0.173 0.117 0.027 0…	0.8035413153456998 0.06745362563237775 0.056492411467116366 0.0851602023608769 0.0 0.48650927487352447 0.26644182124789206 0.0 0.0 0.053962900505902196 0.22428330522765602 0.04047217537942665 0.2706576728499157 0.09190556492411467 0.321247892074199 0.43086003372681286 0.18718381112984825 1.8010118043844858 1.1264755480607085 0.15092748735244518 0.4325463743676223 0.7462057335581788 0.872681281618…	[0.22030512988567352, 0.30672040581703186, 0.08017480373382568, 0.07279526442289352, 0.049362681806087494, 0.17291298508644104, 0.12842391431331635, 0.05673663318157196, 0.03039832040667534, 0.07851310074329376, 0.09648743271827698, 0.08147543668746948, 0.24460124969482422, 0.24482643604278564, 0.3450469970703125, 0.7800145745277405, 0.6133696436882019, 0.6035242080688477, 0.45152586698532104, 0.…	[0.4742497205734253, 0.09952107816934586, 0.15951256453990936, 0.08054785430431366, 0.094570592045784, 0.1264927238225937, 0.09313805401325226, 0.07357525825500488, 0.10263688117265701, 0.09411509335041046, 0.2726083993911743, 0.8381732702255249, 1.003159761428833, 0.7550503015518188, 0.7866016626358032, 0.2723366320133209, 0.2251082956790924, 0.2045808732509613, 0.5819780230522156, 0.75831592082…	48.25
Yang et al.	20668	20832	165	Y	GCGUGGCAACCGGGUGUUGCUAUGCCUAAUCUUUACAAAAUGCAAAGAAUGCUAUUAGAAAAGUGUGACCUUCAAAAUUAUGGUGAUAGUGCAACAUUACCUAAAGGCAUAAUGAUGAAUGUCGCAAAAUAUACUCAACUGUGUCAAUAUUUAAACACAUUAACA	0.077 0.055 0.0 0.222 0.0 0.0 0.024 0.019 0.189 0.183 0.433 1.535 0.95 2.441 5.693 0.0 0.57 0.059 0.0 0.046 0.041 0.272 0.086 0.056 0.0 0.027 1.061 0.701 0.801 0.086 0.175 0.142 0.4 0.113 0.046 0.229 0.077 0.344 0.091 0.92 0.157 0.192 0.129 0.029 0.058 1.834 0.988 0.119 0.9 0.217 0.058 0.333 0.526 1.192 2.263 1.351 1.723 1.614 0.791 1.094 0.476 0.888 0.641 0.341 0.0 0.0 0.237 0.102 0.051 0.027 0.…	0.06492411467116357 0.0463743676222597 0.0 0.18718381112984825 0.0 0.0 0.020236087689713324 0.016020236087689713 0.15935919055649242 0.1543001686340641 0.36509274873524455 1.294266441821248 0.8010118043844857 2.0581787521079256 4.800168634064081 0.0 0.4806070826306914 0.049747048903878585 0.0 0.0387858347386172 0.034569983136593596 0.22934232715008435 0.07251264755480606 0.04721753794266442 0.0 0…	[0.009524635970592499, 0.04100235551595688, 0.04049031063914299, 0.06144718825817108, 0.02956254780292511, 0.008188750594854355, 0.008578091859817505, 0.005478888750076294, 0.012457501143217087, 0.0375436432659626, 0.13185511529445648, 0.733264148235321, 0.5803268551826477, 0.37371283769607544, 0.919796884059906, 0.14473670721054077, 0.1447400450706482, 0.03890135884284973, 0.015333231538534164, …	[0.11307255923748016, 0.17396824061870575, 0.34252896904945374, 0.07810388505458832, 0.1048513650894165, 0.13293099403381348, 0.14650936424732208, 0.12840904295444489, 0.1409909427165985, 0.19653204083442688, 0.48724365234375, 0.3961796760559082, 0.14566084742546082, 0.32034146785736084, 0.36392688751220703, 0.13959139585494995, 0.03043977916240692, 0.03186832368373871, 0.13199570775032043, 0.201…	61.82
Yang et al.	21131	21273	143	Y	AACAAAAGCUAGCUCUUGGAGGUUCCGUGGCUAUAAAGAUAACAGAACAUUCUUGGAAUGCUGAUCUUUAUAAGCUCAUGGGACACUUCGCAUGGUGGACAGCCUUUGUUACUAAUGUGAAUGCGUCAUCAUCUGAAGCAUUU	0.975 0.069 0.564 0.1 0.34 0.025 0.311 0.013 0.149 0.598 0.201 0.377 0.057 0.246 0.138 1.317 0.574 0.0 0.0 0.476 0.05 0.0 0.004 0.028 0.003 0.013 0.0 0.0 0.0 0.0 0.0 0.01 0.009 0.035 0.014 0.01 0.009 0.0 0.055 0.583 0.844 1.838 0.1 0.2 0.594 0.866 2.105 0.026 0.287 0.077 0.258 0.731 0.714 1.144 0.716 1.584 0.066 0.055 0.018 0.0 0.029 0.051 0.0 0.115 0.0 0.012 0.045 0.019 0.13 0.122 0.025 0.337 1.…	0.8220910623946037 0.05817875210792581 0.47554806070826305 0.08431703204047218 0.2866779089376054 0.021079258010118045 0.2622259696458685 0.010961214165261383 0.12563237774030353 0.5042158516020236 0.1694772344013491 0.31787521079258013 0.04806070826306914 0.20741989881956155 0.11635750421585161 1.1104553119730185 0.4839797639123103 0.0 0.0 0.40134907251264756 0.04215851602023609 0.0 0.0033726812…	[0.2504485845565796, 0.07033192366361618, 0.0723438486456871, 0.10206302255392075, 0.06950462609529495, 0.07823260128498077, 0.09840384125709534, 0.10213625431060791, 0.06901441514492035, 0.19937726855278015, 0.5399444699287415, 0.5185154676437378, 0.1416403204202652, 0.1297082006931305, 0.21331192553043365, 0.21115732192993164, 0.5297888517379761, 0.039335448294878006, 0.03157763555645943, 0.055…	[0.34180358052253723, 0.21348461508750916, 0.16039828956127167, 0.16761836409568787, 0.15397346019744873, 0.14627256989479065, 0.2633126378059387, 0.046893224120140076, 0.14939342439174652, 0.04812024533748627, 1.0078213214874268, 0.17705057561397552, 0.36177098751068115, 0.08074658364057541, 0.3202895522117615, 0.1677870750427246, 0.08924940973520279, 0.07777122408151627, 0.06292693316936493, 0.…	0
Yang et al.	22121	22322	202	Y	AAAAAUCUUAGGGAAUUUGUGUUUAAGAAUAUUGAUGGUUAUUUUAAAAUAUAUUCUAAGCACACGCCUAUUAAUUUAGUGCGUGAUCUCCCUCAGGGUUUUUCGGCUUUAGAACCAUUGGUAGAUUUGCCAAUAGGUAUUAACAUCACUAGGUUUCAAACUUUACUUGCUUUACAUAGAAGUUAUUUGACUCCUGGUGAUU	nan nan nan nan nan nan nan nan 0.0 nan 0.229 0.0 0.205 0.101 0.278 0.124 0.125 1.004 0.249 0.0 0.098 0.0 0.101 0.732 0.43 0.648 0.063 0.328 0.159 nan nan nan nan nan nan nan nan nan nan 0.833 1.663 1.019 3.405 1.533 3.267 0.697 0.868 0.867 1.226 3.042 0.11 0.015 0.073 0.337 0.013 0.019 0.02 0.01 0.061 0.0 0.015 0.108 0.002 0.014 0.088 0.0 0.0 0.067 0.121 0.137 0.151 0.393 0.715 0.805 1.436 0.045…	nan nan nan nan nan nan nan nan 0.0 nan 0.1930860033726813 0.0 0.17284991568296795 0.0851602023608769 0.23440134907251267 0.1045531197301855 0.10539629005059023 0.8465430016863407 0.20994940978077573 0.0 0.08263069139966274 0.0 0.0851602023608769 0.6172006745362564 0.3625632377740304 0.5463743676222598 0.053119730185497475 0.27655986509274877 0.13406408094435077 nan nan nan nan nan nan nan nan na…	[0.04483442381024361, 0.016374606639146805, 0.008419778198003769, 0.01747913658618927, 0.02066826820373535, 0.11895564198493958, 0.028515730053186417, 0.06243650242686272, 0.12618926167488098, 0.05277693271636963, 0.016539718955755234, 0.015768524259328842, 0.09495687484741211, 0.10053868591785431, 0.2175920158624649, 0.6200109720230103, 0.7972598671913147, 0.5116406679153442, 0.05635092407464981…	[0.17207325994968414, 0.15834052860736847, 0.11285009235143661, 0.09738261997699738, 0.042670443654060364, 0.09097354114055634, 0.07090947777032852, 0.11169254779815674, 0.08986182510852814, 0.6228598952293396, 0.07143279910087585, 0.029240578413009644, 0.05224438011646271, 0.24623674154281616, 0.38749152421951294, 0.2245064675807953, 0.3581605851650238, 0.3732149600982666, 0.08502998948097229, 0…	0
Yang et al.	25331	25799	469	Y	GAUGAAGACGACUCUGAGCCAGUGCUCAAAGGAGUCAAAUUACAUUACACAUAAACGAACUUAUGGAUUUGUUUAUGAGAAUCUUCACAAUUGGAACUGUAACUUUGAAGCAAGGUGAAAUCAAGGAUGCUACUCCUUCAGAUUUUGUUCGCGCUACUGCAACGAUACCGAUACAAGCCUCACUCCCUUUCGGAUGGCUUAUUGUUGGCGUUGCACUUCUUGCUGUUUUUCAGAGCGCUUCCAAAAUCAUAACCCUCAAAAAGAGAUGGCAACUAGCACUCUCCAAGGGUGUUCACUUUGUUUGCAACUUGCUGUUGUUGUUUGUAACAGUUUACUCACACCUUUUGCUCGUUGCUGCUGGCCUUGAAGCCCCUUUUCUCUAUCUUUAUGCUUUAGUCU…	2.728 3.16 0.554 0.794 0.612 2.393 0.0 0.232 0.774 0.0 0.05 0.018 0.029 0.084 0.107 0.0 0.042 0.0 0.163 1.329 3.367 0.777 0.36 1.1 0.012 0.061 0.278 0.651 1.01 2.555 0.413 0.0 0.049 0.0 0.0 0.28 0.017 0.045 0.392 0.319 0.1 0.691 0.15 0.258 0.091 0.363 0.696 0.765 0.003 0.001 0.356 0.137 0.008 0.066 0.023 0.019 0.0 0.036 0.047 0.075 0.617 0.734 0.721 1.182 0.176 0.646 1.214 0.384 0.0 0.113 0.0 0.0…	2.300168634064081 2.664418212478921 0.46711635750421593 0.6694772344013491 0.5160202360876898 2.017706576728499 0.0 0.19561551433389546 0.6526138279932547 0.0 0.04215851602023609 0.01517706576728499 0.024451939291736932 0.07082630691399663 0.09021922428330523 0.0 0.03541315345699832 0.0 0.13743676222596965 1.1205733558178752 2.838954468802698 0.6551433389544689 0.30354131534569984 0.9274873524451…	[0.21536557376384735, 0.527105450630188, 0.47736412286758423, 0.18611502647399902, 0.12687116861343384, 0.3280467987060547, 0.1647161990404129, 0.10430779308080673, 0.24211743474006653, 0.10331198573112488, 0.17788735032081604, 0.09958995878696442, 0.03528939187526703, 0.14006657898426056, 0.28792956471443176, 0.18400636315345764, 0.07714107632637024, 0.0897398591041565, 0.14095282554626465, 0.24…	[0.14063341915607452, 0.8332391977310181, 0.21874339878559113, 0.16519081592559814, 0.5022662878036499, 0.5105140805244446, 0.13503152132034302, 0.7689132690429688, 1.0035614967346191, 0.19316916167736053, 0.7484216690063477, 0.2952650785446167, 0.14487609267234802, 0.27915942668914795, 0.23272854089736938, 0.12742164731025696, 0.501229465007782, 0.16883835196495056, 0.40399086475372314, 0.989751…	0
Yang et al.	25923	26365	443	Y	UCCUAUUUCUGAACAUGACUACCAGAUUGGUGGUUAUACUGAAAAAUGGGAAUCUGGAGUAAAAGACUGUGUUGUAUUACACAGUUACUUCACUUCAGACUAUUACCAGCUGUACUCAACUCAAUUGAGUACAGACACUGGUGUUGAACAUGUUACCUUCUUCAUCUACAAUAAAAUUGUUGAUGAGCCUGAAGAACAUGUCCAAAUUCACACAAUCGACGGUUCAUCCGGAGUUGUUAAUCCAGUAAUGGAACCAAUUUAUGAUGAACCGACGACGACUACUAGCGUGCCUUUGUAAGCACAAGCUGAUGAGUACGAACUUAUGUACUCAUUCGUUUCGGAAGAGACAGGUACGUUAAUAGUUAAUAGCGUACUUCUUUUUCUUGCUUUCGUGGUAUU…	0.378 0.0 0.0 0.0 0.0 0.266 0.259 0.0 0.559 0.111 0.102 0.889 1.141 0.111 1.454 0.0 0.0 0.605 0.114 0.116 0.266 0.221 0.0 0.786 1.139 6.81 0.124 2.22 0.0 0.0 0.0 0.0 0.0 0.0 0.116 0.0 0.0 0.799 0.341 0.294 0.295 0.0 0.071 0.0 0.114 1.887 1.064 0.0 0.0 0.052 0.04 1.312 0.04 0.03 0.02 0.0 0.0 0.034 0.0 0.292 0.073 0.145 0.157 1.317 0.097 0.07 0.027 0.0 0.0 0.017 0.012 0.2 0.626 2.633 0.683 2.058 0.…	0.31871838111298484 0.0 0.0 0.0 0.0 0.22428330522765602 0.21838111298482296 0.0 0.4713322091062395 0.09359190556492412 0.08600337268128162 0.7495784148397977 0.9620573355817876 0.09359190556492412 1.2259696458684655 0.0 0.0 0.5101180438448567 0.09612141652613829 0.09780775716694773 0.22428330522765602 0.18634064080944351 0.0 0.6627318718381113 0.9603709949409781 5.7419898819561555 0.1045531197301…	[0.1905381679534912, 0.05299806222319603, 0.032408457249403, 0.19433486461639404, 0.31415197253227234, 0.14125581085681915, 0.26770979166030884, 0.1837725043296814, 0.1564333289861679, 0.16240498423576355, 0.2624635696411133, 0.5324702858924866, 0.5463104248046875, 0.21461686491966248, 0.3371025323867798, 0.25304797291755676, 0.09467965364456177, 0.059842534363269806, 0.05222819000482559, 0.13691…	[0.1077452078461647, 0.15770761668682098, 0.19176942110061646, 0.16277606785297394, 0.44439202547073364, 0.08811730146408081, 0.11324179917573929, 0.11619340628385544, 0.4806452989578247, 0.1813361942768097, 0.13928233087062836, 0.9883992075920105, 0.8393919467926025, 0.9778838157653809, 0.31893593072891235, 0.11526729166507721, 0.1904313862323761, 0.24601531028747559, 0.24753892421722412, 0.0967…	20.99
Yang et al.	27115	27311	197	Y	GCUACAGGAUUGGCAACUAUAAAUUAAACACAGACCAUUCCAGUAGCAGUGACAAUAUUGCUUUGCUUGUACAGUAAGUGACAACAGAUGUUUCAUCUCGUUGACUUUCAGGUUACUAUAGCAGAGAUAUUACUAAUUAUUAUGAGGACUUUUAAAGUUUCCAUUUGGAAUCUUGAUUACAUCAUAAACCUCAUAAU	0.0 0.028 0.01 0.046 0.035 0.168 0.0 0.0 0.034 0.028 0.037 0.0 0.044 0.16 0.307 0.372 0.251 0.272 0.75 0.919 3.609 1.203 1.959 1.897 3.831 0.7 0.659 0.906 1.153 0.125 0.227 1.647 3.218 5.035 0.013 0.015 0.018 0.018 0.049 0.027 0.043 0.187 0.0 0.013 0.057 0.105 0.079 0.411 0.565 0.183 0.099 0.101 0.046 0.131 0.38 0.176 0.561 0.635 0.13 0.251 0.492 0.48 0.174 0.702 0.0 0.28 0.56 0.493 0.02 0.144 0.…	0.0 0.02360876897133221 0.008431703204047219 0.0387858347386172 0.029510961214165264 0.14165261382799327 0.0 0.0 0.028667790893760543 0.02360876897133221 0.031197301854974706 0.0 0.03709949409780776 0.1349072512647555 0.2588532883642496 0.3136593591905565 0.21163575042158517 0.22934232715008435 0.6323777403035413 0.7748735244519394 3.043001686340641 1.0143338954468804 1.6517706576728501 1.5994940…	[0.03436872735619545, 0.009904734790325165, 0.00987236574292183, 0.006723247468471527, 0.011467009782791138, 0.09057751297950745, 0.006145302206277847, 0.0031606778502464294, 0.021868493407964706, 0.08268452435731888, 0.05118461325764656, 0.003561936318874359, 0.006870187819004059, 0.27823299169540405, 0.4206550121307373, 0.24938465654850006, 0.39936962723731995, 0.7176170349121094, 0.41650456190…	[0.12177066504955292, 0.06728136539459229, 0.02215033769607544, 0.06754069775342941, 0.11009478569030762, 0.8171523213386536, 0.08311417698860168, 0.08499996364116669, 0.16485336422920227, 0.15647971630096436, 0.05884931981563568, 0.06688114255666733, 0.09247461706399918, 0.8026391267776489, 0.9034730195999146, 0.7026495933532715, 0.8464339971542358, 0.2979348301887512, 0.9989911317825317, 0.4801…	0
Yang et al.	27535	27667	133	Y	CCUCUAGCUGAUAACAAAUUUGCACUGACUUGCUUUAGCACUCAAUUUGCUUUUGCUUGUCCUGACGGCGUAAAACACGUCUAUCAGUUACGUGCCAGAUCAGUUUCACCUAAACUGUUCAUCAGACAAGAGG	0.036 0.01 0.058 0.034 0.069 0.41 0.0 0.03 0.036 0.0 0.148 0.14 0.819 0.565 0.632 0.888 1.136 2.005 1.43 0.341 1.095 0.0 0.026 0.029 0.047 0.057 0.0 0.006 0.015 0.073 0.014 0.0 0.033 0.093 0.026 0.136 0.043 0.0 0.035 0.307 0.394 2.7 0.627 1.356 3.817 0.286 0.085 1.692 0.0 0.0 0.068 0.131 0.0 0.0 0.0 0.074 0.0 0.0 0.0 0.057 0.0 0.013 0.004 0.0 0.135 0.14 0.0 0.114 0.076 0.167 0.538 0.083 0.249 0.1…	0.03035413153456998 0.008431703204047219 0.048903878583473864 0.028667790893760543 0.05817875210792581 0.3456998313659359 0.0 0.025295109612141653 0.03035413153456998 0.0 0.12478920741989882 0.11804384485666106 0.6905564924114671 0.47639123102866776 0.5328836424957841 0.748735244519393 0.9578414839797639 1.690556492411467 1.205733558178752 0.2875210792580101 0.9232715008431703 0.0 0.0219224283305…	[0.017215874046087265, 0.007396712899208069, 0.0010491497814655304, 0.005626603960990906, 0.02473769336938858, 0.3963073194026947, 0.2058452069759369, 0.07527858018875122, 0.044116418808698654, 0.05983572453260422, 0.21962830424308777, 0.19868168234825134, 0.5954574346542358, 0.34347033500671387, 0.5068353414535522, 0.24302995204925537, 0.9753587245941162, 0.7928929328918457, 0.9488765597343445, …	[0.05705173313617706, 0.03593473136425018, 0.05391034483909607, 0.06168174743652344, 0.07390502095222473, 1.0036556720733643, 0.11122404038906097, 0.09156005084514618, 0.035526007413864136, 0.06142445653676987, 0.13414177298545837, 0.1149439811706543, 0.44554588198661804, 0.5449478626251221, 0.8177089691162109, 0.5273532867431641, 0.6830602884292603, 0.785564661026001, 0.24697670340538025, 0.2172…	0
Yang et al.	27876	27997	122	Y	UGUCACGCCUAAACGAACAUGAAAUUUCUUGUUUUCUUAGGAAUCAUCACAACUGUAGCUGCAUUUCACCAAGAAUGUAGUUUACAGUCAUGUACUCAACAUCAACCAUAUGUAGUUGAUGA	0.25 0.765 0.618 0.265 0.441 1.692 0.657 0.035 0.127 0.294 0.138 0.17 0.613 0.109 0.003 0.083 0.132 0.083 0.284 0.356 0.763 0.215 0.885 2.958 1.504 0.97 0.532 0.256 0.3 0.353 0.594 0.169 0.373 0.09 0.49 0.624 0.161 0.146 0.285 0.0 0.358 0.269 0.744 0.132 0.429 0.104 0.052 0.415 0.871 0.113 0.913 1.45 0.29 0.051 0.0 0.146 0.103 0.0 0.026 0.035 0.0 0.041 0.305 0.054 0.063 0.776 1.292 1.609 0.868 0.…	0.21079258010118046 0.6450252951096122 0.5210792580101181 0.2234401349072513 0.3718381112984823 1.4266441821247893 0.5539629005059022 0.029510961214165264 0.10708263069139967 0.2478920741989882 0.11635750421585161 0.1433389544688027 0.5168634064080945 0.09190556492411467 0.0025295109612141656 0.06998313659359191 0.11129848229342328 0.06998313659359191 0.23946037099494097 0.30016863406408095 0.643…	[0.7938512563705444, 0.4825698435306549, 0.7936333417892456, 0.47732552886009216, 0.35441309213638306, 0.5660258531570435, 0.3175086975097656, 0.08928801119327545, 0.049228835850954056, 0.15478980541229248, 0.2531697154045105, 0.22361187636852264, 0.14901670813560486, 0.2637290954589844, 0.1631927192211151, 0.0660138726234436, 0.042673882097005844, 0.04759708791971207, 0.09521602094173431, 0.1802…	[0.13506370782852173, 0.08017204701900482, 0.1894879937171936, 1.0033373832702637, 0.7884327173233032, 1.0026235580444336, 0.20505496859550476, 0.11704014986753464, 0.0836077407002449, 0.07642026245594025, 0.12931093573570251, 0.22696885466575623, 0.6229525208473206, 1.002633810043335, 0.16690382361412048, 0.23322242498397827, 0.16490063071250916, 0.17402051389217377, 0.15575304627418518, 0.14063…	0
Yang et al.	29395	29540	146	Y	GAAGGCUGAUGAAACUCAAGCCUUACCGCAGAGACAGAAGAAACAGCAAACUGUGACUCUUCUUCCUGCUGCAGAUUUGGAUGAUUUCUCCAAACAAUUGCAACAAUCCAUGAGCAGUGCUGACUCAACUCAGGCCUAAACUCAUG	0.616 0.086 0.157 0.0 0.0 0.035 0.022 0.0 0.138 0.121 0.824 0.41 0.244 0.75 0.37 0.261 0.506 0.334 0.572 0.0 0.0 0.0 0.11 0.24 0.835 0.162 0.176 0.0 0.069 0.023 0.347 0.073 0.0 0.314 0.285 0.291 0.0 0.056 0.016 0.0 0.048 0.516 0.169 0.049 0.033 0.463 1.335 0.392 0.151 3.456 0.149 0.033 0.03 0.045 0.419 0.629 0.262 0.004 0.0 0.182 0.072 0.009 0.056 0.103 0.016 0.045 0.112 0.571 0.071 0.126 0.053 0…	0.5193929173693086 0.07251264755480606 0.13237774030354132 0.0 0.0 0.029510961214165264 0.01854974704890388 0.0 0.11635750421585161 0.10202360876897133 0.6947723440134908 0.3456998313659359 0.2057335581787521 0.6323777403035413 0.31197301854974707 0.2200674536256324 0.4266441821247892 0.2816188870151771 0.4822934232715008 0.0 0.0 0.0 0.0927487352445194 0.20236087689713322 0.7040472175379426 0.136…	[0.30459943413734436, 0.07959210872650146, 0.05119785666465759, 0.060738325119018555, 0.01837407425045967, 0.0717640370130539, 0.3403382897377014, 0.11029386520385742, 0.26237741112709045, 0.7966114282608032, 0.5248762369155884, 0.7257242798805237, 0.8751885294914246, 0.6916725039482117, 0.5412840843200684, 0.17873388528823853, 0.25606632232666016, 0.43007534742355347, 0.5703718066215515, 0.15080…	[0.11513863503932953, 0.21679092943668365, 0.15510007739067078, 0.10001220554113388, 0.09430135041475296, 0.09171424806118011, 0.07580439746379852, 0.08970269560813904, 0.30718371272087097, 0.336511492729187, 0.19376200437545776, 0.99983149766922, 0.9110212922096252, 0.9922455549240112, 0.8355923891067505, 0.09274715930223465, 0.3397197425365448, 0.4658009707927704, 0.5194528102874756, 0.10731491…	21.23

## Sheet: E. coli
Start	End	Strand	Length	Putative	Sequence	SHAPE in vitro From Study	Re-normalized SHAPE	RNet Predicted SHAPE	RNet Predicted DMS	Similarity
189716	189835	+	120	N	CUUCCGAUCCAUUUCGUAUACACAGACUGGACGGAAGCGACAAUCUCACUUUGUGUAACAACACACACGUAUCGGCACAUAUUCCGGGGUGCCCUUUGGGGUCGGUAAUAUGGGAUACGU	-0.55 0.03 -0.13 -0.05 nan nan nan -1.44 -0.79 -0.21 -0.24 0.24 1.39 1.07 0.11 0.34 0.19 0.85 0.32 0.31 2.11 -0.07 nan 0.46 1.31 0.6 0.42 0.06 0.05 0.13 -0.18 -1.06 0.01 -0.03 0.02 -0.02 -0.06 nan 0.21 0.24 0.96 0.85 2.64 0.76 0.08 0.35 0.09 2.24 1.42 0.57 1.05 0.04 0.32 0.13 0.37 0.28 0.29 -0.72 0.93 0.06 0.03 0.01 -0.03 0.06 0.09 nan 0.05 -0.06 -0.04 -0.04 -0.04 0.06 0.05 1.56 1.45 0.92 0.11 0.…	-0.41044776119402987 0.022388059701492536 -0.09701492537313433 -0.03731343283582089 nan nan nan -1.0746268656716418 -0.5895522388059702 -0.15671641791044774 -0.1791044776119403 0.1791044776119403 1.0373134328358207 0.7985074626865671 0.08208955223880597 0.2537313432835821 0.1417910447761194 0.6343283582089552 0.23880597014925373 0.23134328358208953 1.5746268656716416 -0.05223880597014926 nan 0.34…	[0.038084760308265686, 0.07997241616249084, 0.032539453357458115, 0.01610959693789482, 0.02325417473912239, 0.3899051249027252, 0.6199092268943787, 0.046429265290498734, 0.01393970474600792, 0.0034250542521476746, 0.0827111303806305, 0.1750030219554901, 0.29683718085289, 0.29165613651275635, 0.1395663470029831, 0.2076406180858612, 0.8593860864639282, 0.6358575820922852, 0.7097911834716797, 0.8781…	[0.09885335713624954, 0.025824278593063354, 0.030199140310287476, 0.05250599980354309, 0.0484999418258667, 0.10834036767482758, 1.004683494567871, 0.04333789646625519, 0.04349103569984436, 0.07399977743625641, 0.2342500388622284, 0.1069163829088211, 0.17783087491989136, 0.10027618706226349, 0.6240203976631165, 0.17737354338169098, 0.3656606078147888, 0.9097288250923157, 0.3798408806324005, 0.9996…	0
961128	961189	+	62	N	CCCGUUGCAAUGGAAUGACAGCGGGUAUGUUAAACAACCCCAUCCGGCAUGGAGCCAGGUGG	0.21 0.01 0.05 0.18 0.15 -0.05 -0.14 0.03 -0.16 0.57 0.95 0.79 2.52 0.35 1.04 1.03 1.5 0.72 0.14 -0.05 0.09 0.65 0.22 0.05 0.07 0.16 nan 0.07 1.57 0.12 2.75 nan 0.17 0.42 0.41 0.01 0.56 -0.07 0.2 -0.03 0.12 0.27 0.27 0.1 0.05 0.25 0.46 0.17 1.21 2.24 3.02 0.18 0.95 0.07 0.21 -0.03 -0.18 -0.14 0.39 0.03 0.1 -0.0	0.15671641791044774 0.007462686567164179 0.03731343283582089 0.13432835820895522 0.11194029850746268 -0.03731343283582089 -0.10447761194029852 0.022388059701492536 -0.11940298507462686 0.42537313432835816 0.708955223880597 0.5895522388059702 1.880597014925373 0.26119402985074625 0.7761194029850746 0.7686567164179104 1.1194029850746268 0.5373134328358209 0.10447761194029852 -0.03731343283582089 0.…	[0.006753295660018921, 0.004134882241487503, 0.0046233125030994415, 0.02395280823111534, 0.14228829741477966, 0.05229848995804787, 0.03377076983451843, 0.16177916526794434, 0.1278456747531891, 0.5555623173713684, 0.5615271329879761, 0.42368295788764954, 0.7923246622085571, 0.5638495087623596, 0.807110607624054, 0.7495070695877075, 0.4750058054924011, 0.565446138381958, 0.10824031382799149, 0.0531…	[0.05157947540283203, 0.024799883365631104, 0.053423359990119934, 0.14639584720134735, 0.06782454252243042, 0.061831384897232056, 0.11093523353338242, 0.4846283197402954, 0.6649170517921448, 0.5069811344146729, 0.2511686086654663, 0.17822329699993134, 0.20127899944782257, 0.9486610293388367, 0.9780580401420593, 0.21195447444915771, 0.13154619932174683, 0.9449572563171387, 0.20475660264492035, 0.1…	0
1798057	1798129	-	73	N	GAAACAGUAAGGCCUUCAAGUAGCACUGUCUGUGGAGCCUUCGGGCUUCACAGGCUUUGUUCGCCUUUGUUUC	0.13 0.01 0.06 0.01 0.27 0.9 5.85 1.79 0.06 0.08 0.03 0.01 0.12 -0.03 1.26 0.43 0.08 0.01 0.19 0.29 nan 0.07 -0.15 -0.22 -0.12 -0.08 -0.11 nan -0.1 -0.15 -0.05 -0.03 -0.05 -0.04 nan 0.01 -0.0 -0.01 -0.05 nan 0.16 0.62 0.11 -0.04 -0.23 -0.24 -0.06 nan -0.06 -0.02 -0.07 -0.02 -0.48 nan 0.25 0.04 nan -0.02 0.01 -0.02 0.09 0.03 -0.07 -0.13 0.33 0.52 0.02 0.16 -0.03 -0.15 0.05 0.05 0.38	0.2835820895522388 0.03731343283582089 0.03731343283582089 -0.11194029850746268 -0.022388059701492536 0.11940298507462686 0.014925373134328358 0.3880597014925373 0.2462686567164179 -0.09701492537313433 -0.05223880597014926 0.022388059701492536 0.06716417910447761 -0.014925373134328358 0.007462686567164179 -0.014925373134328358 nan 0.029850746268656716 0.18656716417910446 nan -0.3582089552238806 -…	[0.09461237490177155, 0.061762917786836624, 0.13596397638320923, 0.047116901725530624, 0.09097111225128174, 0.28674939274787903, 0.6446248292922974, 0.9906090497970581, 0.5258837938308716, 0.3532460331916809, 0.23854778707027435, 0.1474306285381317, 0.19231224060058594, 0.4350179433822632, 0.7868229746818542, 0.9872283339500427, 0.6625368595123291, 0.7987253665924072, 0.9079642295837402, 0.582236…	[0.055392831563949585, 0.19450566172599792, 0.1782798171043396, 0.16649016737937927, 0.12404294312000275, 0.4957457184791565, 0.18874704837799072, 0.4345097243785858, 0.3678305149078369, 0.30976396799087524, 0.08226809650659561, 0.1691732257604599, 0.13590669631958008, 0.9562867879867554, 0.15595170855522156, 0.17454025149345398, 0.8606511354446411, 0.8746528625488281, 0.9743649959564209, 0.28187…	0
1798206	1798425	-	220	N	UCUUCUAAGGAACAGAAGAAAAAGCAAAAAGUUAUCCAGGUUAAGGAAAUUAAAUUCCGUCCUGGUACAGAUGAAGGCGACUAUCAGGUAAAACUCCGCAGCCUGAUUCGCUUUCUCGAAGAGGGUGAUAAAGCCAAAAUCACGCUGCGUUUCCGCGGUCGUGAGAUGGCGCACCAGCAAAUCGGUAUGGAAGUGCUUAAUCGCGUGAAAGACGAUUUGC	0.16 0.72 -0.04 -0.01 -0.17 0.99 0.14 0.69 0.52 0.05 0.2 0.83 0.88 -0.0 0.15 0.29 0.53 0.64 -0.04 7.81 0.89 0.06 -0.01 1.27 0.29 -0.09 0.46 0.21 0.45 0.14 1.75 0.04 -0.06 0.33 1.52 0.01 0.14 0.3 -0.02 nan nan nan nan nan nan nan nan nan nan nan 0.33 3.5 0.36 nan 0.06 -0.29 3.09 0.0 nan 0.01 0.18 0.03 -0.03 -0.16 0.01 0.21 0.2 0.82 0.58 3.99 0.89 3.34 0.14 0.08 0.08 nan 0.21 -0.01 0.02 0.26 nan 0.…	0.26865671641791045 0.03731343283582089 0.06716417910447761 -0.07462686567164178 -0.022388059701492536 -0.15671641791044774 0.007462686567164179 0.08955223880597014 0.06716417910447761 0.42537313432835816 0.10447761194029852 -0.029850746268656716 0.08208955223880597 0.5895522388059702 0.47761194029850745 0.18656716417910446 0.19402985074626866 -0.05223880597014926 0.17164179104477612 0.4104477611…	[0.10322688519954681, 0.05697650834918022, 0.13641327619552612, 0.12003851681947708, 0.08530281484127045, 0.2500644028186798, 0.6608432531356812, 0.855316698551178, 0.5726351141929626, 0.5931969881057739, 0.7292687296867371, 0.5566386580467224, 0.43545401096343994, 0.2802926301956177, 0.2338697612285614, 0.152569979429245, 0.13382525742053986, 0.3024953603744507, 0.09699205309152603, 0.2471782863…	[0.07895313948392868, 0.10027004033327103, 0.08582283556461334, 0.08431866019964218, 0.1437002271413803, 0.1308402717113495, 1.0004870891571045, 1.0033055543899536, 0.15987902879714966, 0.2106761783361435, 1.0009591579437256, 0.9693267941474915, 0.9425859451293945, 0.5174298882484436, 0.1010831668972969, 0.3776906132698059, 0.4379321336746216, 0.10677142441272736, 0.33338677883148193, 0.651120066…	24.55
2659588	2659651	-	64	N	GAAUCAGGCCGGAGUGCUAAAUACUCCGUAAACACGGUCGUACAUCCAGCCGGUAGCCUGAUUC	0.75 -0.01 -0.04 0.3 -0.22 -0.3 0.44 0.42 -0.0 -0.04 0.07 1.18 0.08 0.06 0.45 0.05 -0.12 0.13 0.12 -0.06 -0.07 0.62 0.03 0.02 -0.12 0.14 0.05 0.76 0.78 -0.16 0.5 0.67 2.64 0.46 0.51 0.36 0.15 0.34 0.0 0.27 1.11 1.14 0.02 0.65 1.8 0.6 0.28 -0.26 0.93 -0.29 0.46 -0.05 0.07 0.17 0.56 -0.04 -0.13 0.23 -0.16 -0.02 0.15 0.17 -0.26 0.38	0.2835820895522388 -0.19402985074626866 0.12686567164179105 0.11194029850746268 -0.014925373134328358 -0.11940298507462686 0.17164179104477612 -0.09701492537313433 -0.029850746268656716 0.41791044776119407 0.12686567164179105 0.05223880597014926 -0.03731343283582089 0.34328358208955223 -0.21641791044776115 0.6940298507462687 -0.19402985074626866 0.20895522388059704 0.4477611940298507 1.3432835820…	[0.02289791777729988, 0.006693977862596512, 0.020838662981987, 0.007071085274219513, 0.0031946562230587006, 0.003248445689678192, 0.01185067743062973, 0.00350179523229599, 0.03856303170323372, 0.0167747363448143, 0.004977799952030182, 0.008356794714927673, 0.024354152381420135, 0.030582919716835022, 0.11127907782793045, 0.1536332219839096, 0.6267476677894592, 0.9476273655891418, 0.723527371883392…	[0.05469916760921478, 0.11395760625600815, 0.06085336208343506, 0.027591466903686523, 0.05342201888561249, 0.11469338834285736, 0.03624387085437775, 0.10345818102359772, 0.19205845892429352, 0.13188175857067108, 0.09415924549102783, 0.04441560059785843, 0.20208892226219177, 0.0918973833322525, 0.048699527978897095, 0.34112080931663513, 1.0037810802459717, 0.31098952889442444, 0.6380588412284851, …	90.62
3440516	3440611	-	96	N	GGGUUGAGCUGGCUAGAUUAGCCAGCCAAUCUUUUGUAUGUCUGUGCGUUUCCAUUUGAGUAUCCUGAAAACGGGCUUUUCAGCAUGGAACGUACA	0.09 -0.2 -0.15 0.17 -0.01 0.05 nan -0.07 -0.03 -0.03 0.06 -0.29 -0.05 0.03 2.45 nan 1.17 0.28 0.23 0.17 0.08 0.02 0.15 0.02 -0.11 -0.01 nan 0.08 -0.01 nan -0.25 0.98 3.0 0.7 1.07 5.68 0.35 5.4 1.0 4.4 0.39 1.34 0.07 0.04 -0.04 0.05 -0.04 -0.15 0.04 0.87 -0.09 -0.05 -0.01 0.13 0.01 0.01 0.07 0.15 -0.03 0.98 0.23 1.0 0.54 0.33 -0.02 0.65 0.76 0.03 0.04 0.03 0.35 nan 0.08 nan -0.2 -0.08 0.38 0.29 0…	0.16417910447761194 0.05970149253731343 0.014925373134328358 0.3059701492537313 0.04477611940298507 -0.09701492537313433 -0.0 -0.0 -0.0 -0.022388059701492536 0.0 -0.08208955223880597 nan 0.10447761194029852 0.3731343283582089 0.26865671641791045 0.3880597014925373 0.3805970149253731 0.21641791044776115 0.2835820895522388 -0.05970149253731343 -0.14925373134328357 nan 0.05970149253731343 nan 0.2611…	[0.07110083103179932, 0.016686074435710907, 0.013283051550388336, 0.019978709518909454, 0.022647984325885773, 0.09028155356645584, 0.2505161166191101, 0.055148638784885406, 0.016203075647354126, 0.008798375725746155, 0.01719040423631668, 0.0026385560631752014, 0.06838615238666534, 0.18103137612342834, 0.5510019063949585, 0.39066553115844727, 0.9800671339035034, 0.9737316370010376, 0.7934690117835…	[0.07813563197851181, 0.03423753380775452, 0.10357159376144409, 0.01814165711402893, 0.014208540320396423, 0.053124308586120605, 0.7854019403457642, 0.10687265545129776, 0.035248398780822754, 0.018290594220161438, 0.026111125946044922, 0.059350475668907166, 0.02234947681427002, 0.0510418564081192, 0.7367973327636719, 0.17031849920749664, 1.0024867057800293, 0.3557712435722351, 0.23101256787776947…	59.38
3451328	3451444	-	117	N	AGGUUCAAUCUGAACCUCAGUUAGCCGAAUUUGGCUACCUAACAAUGCUCCCAAUCGGGGAGCUACGUAAGAACGGUUACACUCUCCCAUCAAUCGUAAUGGGUCUGAGGAGUAAUC	-0.48 -0.12 0.12 -0.08 -0.09 0.01 0.19 1.05 0.98 nan 0.07 -0.1 0.1 -0.04 -0.24 -0.12 -0.24 nan 0.31 0.72 0.31 0.38 0.22 0.02 0.19 0.1 nan 1.48 1.47 1.57 0.06 nan nan nan nan nan nan nan nan nan nan 0.7 0.8 0.24 1.02 1.48 -0.01 0.15 -0.17 -0.24 -0.07 0.22 nan 2.04 3.21 0.85 0.15 0.18 0.07 -0.02 0.07 0.3 0.1 -0.07 0.19 0.59 3.18 0.21 0.08 1.13 0.65 0.75 0.49 2.15 0.4 -0.05 -0.02 0.23 -0.01 0.08 -0.…	1.425373134328358 0.5671641791044776 0.10447761194029852 0.17164179104477612 0.39552238805970147 0.14925373134328357 0.5149253731343283 0.12686567164179105 0.2537313432835821 0.04477611940298507 0.3059701492537313 0.3208955223880597 1.0597014925373134 0.3731343283582089 0.3208955223880597 -0.05223880597014926 0.08955223880597014 -0.014925373134328358 0.007462686567164179 0.3507462686567164 0.1791…	[0.10737825185060501, 0.031831271946430206, 0.021553892642259598, 0.0780361145734787, 0.06460335105657578, 0.1327570080757141, 0.5926903486251831, 0.8044551610946655, 0.8761262893676758, 0.8957703709602356, 0.6012744903564453, 0.10460515320301056, 0.030622240155935287, 0.0419502854347229, 0.013282570987939835, 0.03738424926996231, 0.03275967389345169, 0.1643787920475006, 0.09846727550029755, 0.08…	[0.26938480138778687, 0.03085203468799591, 0.030056044459342957, 0.02439841628074646, 0.02536967396736145, 0.09024398773908615, 0.9068306088447571, 0.9999831318855286, 0.5069039463996887, 1.002202033996582, 0.30756324529647827, 0.053125083446502686, 0.09641066193580627, 0.07682576775550842, 0.06074166297912598, 0.040677234530448914, 0.06115279346704483, 0.9560853242874146, 0.47982046008110046, 0.…	0
3472102	3472200	-	99	N	AUGGUUCUCCGUUAAGUAAGGCCAAACGUUUUAACUUAAAUGUCAAACUAAACUCGUAGAGUUUUGGACAAUCCUGAAUUAACAACGGAGUAUUUCCAU	0.01 0.02 0.2 -0.04 0.69 0.04 0.26 -0.17 -0.04 -0.01 0.09 0.01 0.08 0.08 0.06 0.17 -0.03 -0.03 0.2 0.32 0.05 0.36 -0.16 1.04 0.2 0.18 0.32 0.41 -0.05 0.02 0.37 0.57 1.39 0.19 1.04 0.28 2.14 0.39 0.35 0.64 1.15 0.31 0.21 0.97 0.59 0.07 0.05 0.72 1.69 0.03 -0.03 0.06 0.1 0.12 -0.05 nan 0.77 0.46 0.28 0.04 0.07 0.03 0.01 0.37 nan 1.03 0.21 0.18 0.34 -0.02 0.51 0.44 0.06 -0.03 0.97 0.82 0.13 0.15 0.4…	0.7388059701492536 0.18656716417910446 -0.029850746268656716 0.12686567164179105 -0.014925373134328358 0.6417910447761194 0.06716417910447761 1.2910447761194028 -0.05970149253731343 0.33582089552238803 -0.08955223880597014 0.05223880597014926 0.07462686567164178 0.05970149253731343 0.16417910447761194 0.08208955223880597 0.29850746268656714 0.3134328358208955 1.9104477611940298 0.6417910447761194…	[0.08119183778762817, 0.11143933981657028, 0.013466861099004745, 0.015073012560606003, 0.44052326679229736, 0.16593976318836212, 0.03029041737318039, 0.01938460022211075, 0.0005538091063499451, 0.0014139153063297272, 0.0014924444258213043, 0.01482812687754631, 0.2071940153837204, 0.26098281145095825, 0.09301675111055374, 0.16735851764678955, 0.1947413682937622, 0.10417892038822174, 0.118749283254…	[0.1345653533935547, 0.0533236563205719, 0.0783199593424797, 0.050140440464019775, 0.18825221061706543, 0.15310059487819672, 0.08063487708568573, 0.0450175404548645, 0.018144384026527405, 0.058180734515190125, 0.053194716572761536, 0.020182207226753235, 0.032273069024086, 0.5708966255187988, 0.6294406056404114, 0.10891855508089066, 0.12129676342010498, 0.49621111154556274, 0.24636465311050415, 0.…	0
3717998	3718062	+	65	N	CCUUUAACGCUUCAAAAUCUGUAAAGCACGCCAUAUCGCCGAAAGGCACACUUAAUUAUUAAAGG	-0.01 0.07 -0.05 0.03 -0.13 1.12 0.53 0.52 0.41 -0.06 0.07 nan 0.22 0.21 0.15 -0.33 1.77 1.57 0.39 0.25 2.34 1.24 0.2 -1.36 0.03 0.31 0.03 0.24 0.31 nan 0.0 0.03 1.08 2.08 2.37 1.42 1.45 0.06 0.26 -0.01 0.29 0.1 0.1 nan 0.08 3.79 0.01 0.3 0.05 0.26 0.26 1.83 4.08 2.64 3.39 0.48 nan 0.9 0.22 0.81 0.2 0.02 0.26 nan 0.1	-0.007462686567164179 0.05223880597014926 -0.03731343283582089 0.022388059701492536 -0.09701492537313433 0.8358208955223881 0.39552238805970147 0.3880597014925373 0.3059701492537313 -0.04477611940298507 0.05223880597014926 nan 0.16417910447761194 0.15671641791044774 0.11194029850746268 -0.2462686567164179 1.3208955223880596 1.171641791044776 0.291044776119403 0.18656716417910446 1.746268656716417…	[0.0008371584117412567, 0.006593871861696243, 0.06635111570358276, 0.029756568372249603, 0.05096739903092384, 0.5997997522354126, 0.21004977822303772, 0.6118978261947632, 0.15568386018276215, 0.3705214858055115, 0.5571152567863464, 0.5660662651062012, 0.4488803744316101, 0.6586819887161255, 0.7653844356536865, 0.5526172518730164, 0.6556616425514221, 0.5305773019790649, 0.39981111884117126, 0.3083…	[0.057730451226234436, 0.032456472516059875, 0.02321702241897583, 0.025928378105163574, 0.029857009649276733, 0.23559430241584778, 0.35748469829559326, 0.997059166431427, 0.1538352221250534, 0.4676947295665741, 0.10350556671619415, 0.0926818996667862, 0.6717646718025208, 0.4964998960494995, 0.5004639029502869, 0.541736364364624, 0.5321151614189148, 0.1483812928199768, 0.4730139970779419, 0.170402…	100
4177807	4177996	+	190	N	UUCGUUGGAGCCUGGCCUAUCCAGGCCUCCGUCGAAGACCGCAGGAGUUUCGCAAGAAACUUAAUCCCCUGCGUAGACGGUGACAGAACGCUAAGAUUAUUCUUUUAUAUUCUGGCUUGUUUCUGCUCACCGUAAUUAAGACGCUCUCUCCGUUUGGAGGAGUGAAGUGAGUUCCAGAGAUUUUCUCUGG	0.1 0.27 0.56 0.71 0.06 1.48 0.11 -0.01 0.08 -0.0 -0.02 -0.02 0.06 0.04 0.82 -0.01 0.48 1.41 1.97 1.03 0.01 1.0 -0.01 0.0 -0.09 -0.02 0.12 0.14 0.01 -0.01 0.14 nan 0.09 0.02 0.07 1.2 1.38 1.09 -0.08 0.3 -0.1 -0.02 0.0 0.0 0.77 0.16 0.04 -0.02 0.01 0.0 0.0 0.31 0.08 0.03 1.01 -0.02 -0.02 -0.02 0.06 -0.1 0.03 0.25 1.3 0.99 2.12 0.13 0.21 -0.05 0.0 0.06 0.09 -0.08 -0.02 0.02 1.15 1.03 0.14 0.0 -0.02…	0.07462686567164178 0.20149253731343283 0.41791044776119407 0.5298507462686567 0.04477611940298507 1.1044776119402984 0.08208955223880597 -0.007462686567164179 0.05970149253731343 -0.0 -0.014925373134328358 -0.014925373134328358 0.04477611940298507 0.029850746268656716 0.6119402985074626 -0.007462686567164179 0.3582089552238806 1.052238805970149 1.4701492537313432 0.7686567164179104 0.00746268656…	[0.0792762041091919, 0.07140736281871796, 0.02968551218509674, 0.0368918739259243, 0.15934999287128448, 0.3249172568321228, 0.0316738523542881, 0.019367367029190063, 0.02467336505651474, 0.020208008587360382, 0.015891198068857193, 0.024462919682264328, 0.040935665369033813, 0.05692155659198761, 0.0723235011100769, 0.35565075278282166, 0.5752522945404053, 0.9582235217094421, 0.9093858003616333, 0.…	[0.026143178343772888, 0.01692168414592743, 0.1117744892835617, 0.1333145797252655, 0.13779360055923462, 0.16272127628326416, 0.15288442373275757, 0.09865117818117142, 0.29760026931762695, 0.1235586479306221, 0.129445880651474, 0.09116476029157639, 0.048173800110816956, 0.09724659472703934, 0.11565136909484863, 1.002220869064331, 1.0051170587539673, 0.5594462156295776, 0.8063201308250427, 0.35285…	0
21107	21152	-	46	Y	GACAAAAGAAGGCUAAAAGGGCAUAUUCCUCGGCCUUUGAAUUGUC	-0.9 0.01 -0.77 0.0 0.08 0.22 -0.12 nan 0.38 -0.13 -0.08 0.12 -0.07 2.78 0.44 0.23 1.32 0.57 nan -0.27 nan 1.47 0.12 -0.35 3.63 0.38 0.56 0.05 -0.04 0.42 1.81 -0.67 -0.21 -0.11 nan 0.0 nan -0.07 nan -0.03 1.01 0.14 -0.16 0.37 -1.49 0.55	0.41044776119402987 -1.1119402985074627 0.2761194029850746 -0.11940298507462686 0.10447761194029852 0.753731343283582 -0.022388059701492536 nan -0.05223880597014926 nan 0.0 nan -0.08208955223880597 -0.15671641791044774 -0.5 1.3507462686567164 0.3134328358208955 -0.029850746268656716 0.03731343283582089 0.41791044776119407 0.2835820895522388 2.7089552238805967 -0.26119402985074625 0.08955223880597…	[0.021192841231822968, 0.0025909580290317535, 0.002482481300830841, 0.0030342265963554382, 0.07899750024080276, 0.3356720805168152, 0.08723360300064087, 0.17176848649978638, 0.03636248782277107, 0.029979081824421883, 0.009723491966724396, 0.002968810498714447, 0.09096736460924149, 0.42654117941856384, 0.36371827125549316, 0.20919549465179443, 0.2705242335796356, 0.22988981008529663, 0.23779903352…	[0.0638076439499855, 0.11968217045068741, 0.07465554773807526, 0.09522709250450134, 0.22412052750587463, 0.8355424404144287, 0.9738754630088806, 0.10327138751745224, 0.1567431092262268, 0.16277149319648743, 0.0513443797826767, 0.05184192955493927, 0.07191760838031769, 0.22196847200393677, 0.5245569944381714, 0.7855127453804016, 0.49814367294311523, 0.17238888144493103, 0.06854870915412903, 0.0393…	0
1299142	1299178	+	37	Y	UCCCAAUCCGGGAUUACACAUGCUGGUUAAUACCAGU	-0.17 -0.01 0.17 0.22 0.4 0.14 1.98 0.22 -0.04 0.18 -0.22 0.2 0.2 nan 0.98 -0.02 2.5 -0.02 0.06 1.18 nan 0.64 0.18 0.05 -0.38 0.28 0.19 1.56 0.11 0.55 nan 1.28 0.04 0.01 0.17 0.39 nan	-0.12686567164179105 -0.007462686567164179 0.12686567164179105 0.16417910447761194 0.29850746268656714 0.10447761194029852 1.4776119402985073 0.16417910447761194 -0.029850746268656716 0.13432835820895522 -0.16417910447761194 0.14925373134328357 0.14925373134328357 nan 0.7313432835820894 -0.014925373134328358 1.8656716417910446 -0.014925373134328358 0.04477611940298507 0.880597014925373 nan 0.4776…	[0.08643828332424164, 0.013568643480539322, 0.011056158691644669, 0.051227420568466187, 0.3633137047290802, 0.5839424133300781, 0.7316652536392212, 0.5632949471473694, 0.3272157907485962, 0.029260702431201935, 0.025306209921836853, 0.03781668841838837, 0.1305074393749237, 0.6902104616165161, 0.7014765739440918, 0.46982717514038086, 0.25966253876686096, 0.024686112999916077, 0.33543044328689575, 0…	[0.01583901047706604, 0.016865521669387817, 0.030348777770996094, 0.05658161640167236, 0.9886665940284729, 1.0014983415603638, 0.5157894492149353, 0.9061836004257202, 0.9299216866493225, 0.06489027291536331, 0.030007019639015198, 0.0327586829662323, 0.21225515007972717, 0.10820348560810089, 0.17851047217845917, 0.516264796257019, 0.7278374433517456, 0.6048496961593628, 0.7591851353645325, 0.59106…	0
2817194	2817335	-	142	Y	AGUCAGGUUGAAGUUGUGUAUAUCGGCUAAACUUAGGUUUAACAGAAUGUAAUGCCAUGACUGCUUAGAUGUAAUGUGUUUGUCAUUGCUUACUUUUUGGCGUUAUAUGAUGGAUAAUGCCGGGAUACAGAGAGACCCGACU	0.01 0.18 -0.34 0.08 -0.06 0.2 nan 0.07 1.04 1.31 0.66 1.25 2.97 2.63 0.18 2.66 0.24 -0.28 -0.11 0.14 0.45 0.45 0.35 -0.16 -0.04 0.52 0.08 0.42 0.15 0.15 0.17 0.54 nan 0.17 nan nan -0.0 0.04 -0.15 0.17 0.79 nan 0.13 0.52 0.42 nan 0.13 -0.27 0.07 0.12 -0.02 -0.02 -0.12 0.25 -0.27 0.39 0.77 1.7 0.79 0.07 1.08 0.41 1.29 0.38 0.81 0.39 1.66 0.78 0.22 0.41 -0.1 0.12 -0.01 0.14 0.17 1.38 0.15 2.58 0.14…	-0.10447761194029852 -0.42537313432835816 nan 0.15671641791044774 0.3656716417910447 -0.04477611940298507 0.03731343283582089 nan 0.022388059701492536 0.022388059701492536 0.11940298507462686 0.022388059701492536 1.425373134328358 -0.15671641791044774 0.3805970149253731 0.05223880597014926 -0.26865671641791045 0.15671641791044774 0.13432835820895522 0.20149253731343283 nan 0.014925373134328358 0.…	[0.05022270977497101, 0.027316570281982422, 0.02560902014374733, 0.048023682087659836, 0.08977439254522324, 0.06171612814068794, 0.13718119263648987, 0.22665134072303772, 0.4508046507835388, 0.6053147315979004, 0.8961259722709656, 0.7593459486961365, 0.6096176505088806, 0.7815954089164734, 0.6950367093086243, 0.851709246635437, 0.08515965938568115, 0.29114842414855957, 0.648399293422699, 0.076492…	[0.21974064409732819, 0.059030212461948395, 0.04114750027656555, 0.10708430409431458, 0.30317452549934387, 0.09062148630619049, 0.1043146550655365, 0.07442473620176315, 0.18787886202335358, 0.11831428110599518, 1.005133867263794, 0.9908604621887207, 0.12367036938667297, 0.18474817276000977, 0.15305113792419434, 0.23204298317432404, 0.15615732967853546, 0.13586175441741943, 0.09141942113637924, 0.…	0
2865927	2865971	-	45	Y	AUCGAAACCUUUGGCGCUUCUGAGGGGGGCAACAAGGGGAUUGAU	0.63 0.59 0.13 -0.32 0.1 0.22 0.24 0.08 -0.43 -0.08 -0.36 0.19 0.21 0.87 0.68 -0.49 nan -1.57 0.65 0.32 1.28 1.54 9.61 2.43 2.78 0.08 0.01 -0.81 0.44 0.31 -0.26 -0.07 0.19 -0.13 -0.5 -0.45 -0.22 0.54 0.29 0.4 0.06 0.53 0.68 0.15 0.08	0.05970149253731343 0.11194029850746268 0.5074626865671642 0.39552238805970147 0.04477611940298507 0.29850746268656714 0.21641791044776115 0.40298507462686567 -0.16417910447761194 -0.33582089552238803 -0.3731343283582089 -0.09701492537313433 0.1417910447761194 -0.05223880597014926 -0.19402985074626866 0.23134328358208953 0.3283582089552239 -0.6044776119402985 0.007462686567164179 0.05970149253731…	[0.19347019493579865, 0.22638455033302307, 0.12315856665372849, 0.1567833423614502, 0.1772289276123047, 0.2822485864162445, 0.31348922848701477, 0.049094703048467636, 0.03408735245466232, 0.14800477027893066, 0.16126464307308197, 0.1329076588153839, 0.1509116291999817, 0.23792818188667297, 0.21558021008968353, 0.12747442722320557, 0.27830779552459717, 0.5033353567123413, 0.3759952187538147, 0.187…	[0.3293039798736572, 0.05428054928779602, 0.191587895154953, 0.17130620777606964, 0.6918002367019653, 0.7378139495849609, 0.6189739108085632, 0.17154854536056519, 0.11816038191318512, 0.06240127235651016, 0.06370282173156738, 0.04582199454307556, 0.11740251630544662, 0.22040531039237976, 1.0030524730682373, 0.18051931262016296, 0.22628426551818848, 0.046586647629737854, 0.1013963371515274, 0.1381…	0
2866048	2866126	-	79	Y	GUGCUAACAAAAUGUUGCCGAACAACAAGCCAACUGCGACCACGGUCACAGCGCCUGUAACGGUACCAACAGCAAGCAC	0.42 0.58 0.3 0.2 -1.04 0.23 1.29 1.41 0.12 0.57 0.79 -0.0 0.71 0.36 -0.05 0.03 -0.01 0.71 0.28 0.58 nan 0.25 0.11 -0.13 1.87 0.1 0.0 0.45 0.67 0.86 -0.56 0.23 0.21 0.02 0.62 0.34 nan -0.38 0.37 0.2 -0.22 nan 0.7 0.27 0.07 0.08 0.2 nan -0.01 -0.22 0.12 nan 0.72 0.26 0.33 0.17 -0.06 0.02 nan -0.3 0.2 -0.26 0.21 0.51 0.64 -0.49 0.0 0.31 1.06 0.28 0.19 3.4 nan -0.01 -0.28 0.2 -0.0 0.07 -0.04	-0.029850746268656716 0.05223880597014926 -0.0 0.14925373134328357 -0.20895522388059704 -0.007462686567164179 nan 2.5373134328358207 0.1417910447761194 0.20895522388059704 0.7910447761194029 0.23134328358208953 0.0 -0.3656716417910447 0.47761194029850745 0.3805970149253731 0.15671641791044774 -0.19402985074626866 0.14925373134328357 -0.22388059701492535 nan 0.014925373134328358 -0.044776119402985…	[0.20980843901634216, 0.20800547301769257, 0.10156947374343872, 0.17098325490951538, 0.5920686721801758, 0.9205607771873474, 0.5838075876235962, 0.5050103664398193, 0.735133171081543, 0.6597589254379272, 0.7426245212554932, 0.7496427297592163, 0.8730049729347229, 0.30075451731681824, 0.2280610203742981, 0.16366098821163177, 0.20549355447292328, 0.1516992747783661, 0.1352078765630722, 0.4568316936…	[0.09208039939403534, 0.050892993807792664, 0.1097792312502861, 0.18539440631866455, 0.1189633384346962, 0.6593448519706726, 0.7940849661827087, 1.00445556640625, 0.7051957249641418, 0.6407027244567871, 0.6902774572372437, 0.6050980687141418, 0.15480011701583862, 0.053841352462768555, 0.04235951602458954, 0.035843804478645325, 0.10818247497081757, 0.24757635593414307, 0.2815582752227783, 0.114429…	0
3069427	3069510	-	84	Y	GCGAUGCUCGAAGAGCGCGCUAAGAAGUAAAAAAUCACAGGGCAGGGAAACCUGCCCUUGUUUCAGCGCGCUUUUAGAGCACGC	0.46 0.29 0.45 2.11 0.4 0.29 -0.04 -0.15 -0.1 0.92 0.17 -0.03 0.8 0.21 0.33 -0.15 -0.29 0.08 -0.46 0.0 0.59 0.79 nan 1.07 0.69 0.09 2.32 4.56 0.21 0.73 0.47 0.24 0.04 0.27 0.71 0.13 -0.36 0.34 -0.21 -0.34 -0.18 0.49 -0.2 0.05 0.23 -0.08 1.01 0.09 0.18 0.02 -0.21 -0.06 -0.4 nan nan 0.04 0.16 -0.17 -0.23 0.22 -0.02 0.57 1.47 0.22 -0.02 0.18 -0.03 0.22 nan 0.27 nan 0.19 0.65 0.03 -0.0 0.54 0.07 0.16…	0.05223880597014926 0.022388059701492536 0.07462686567164178 -0.7910447761194029 -0.880597014925373 0.022388059701492536 0.11940298507462686 0.05223880597014926 0.40298507462686567 -0.0 0.022388059701492536 0.48507462686567165 0.1417910447761194 nan 0.20149253731343283 nan 0.16417910447761194 -0.022388059701492536 0.13432835820895522 -0.014925373134328358 0.16417910447761194 1.0970149253731343 0.…	[0.036181509494781494, 0.03690387308597565, 0.4968428611755371, 0.6455187201499939, 0.10087011009454727, 0.01383238285779953, 0.009768135845661163, 0.004303712397813797, 0.010276734828948975, 0.04543144628405571, 0.06623309850692749, 0.04569796100258827, 0.019977662712335587, 0.010418109595775604, 0.01083974540233612, 0.00809049978852272, 0.0002895742654800415, 0.00132693350315094, 0.002716090530…	[0.15100011229515076, 0.02782323956489563, 0.1299944967031479, 0.9825109839439392, 0.04731139540672302, 0.10006826370954514, 0.017931491136550903, 0.010794475674629211, 0.02991555631160736, 0.09155286103487015, 0.49891671538352966, 0.40244215726852417, 0.05082634091377258, 0.08714821934700012, 0.045642852783203125, 0.037912532687187195, 0.11734148114919662, 0.04007132351398468, 0.1085804626345634…	0
3376701	3376819	-	119	Y	CAAGAAAGUUUUUUUCCCAAAACUUUUUGUGUGCUGGCAUAGGCUAUUCGAAGGGGUAGGUUUGCCGGACUUUGUCGUGUGAACCUCAACAAUUGAAGACGUUUGGGUGUUCACCAACG	nan nan nan nan nan nan nan nan nan nan nan nan nan nan nan 2.92 0.25 0.24 0.04 0.04 -0.07 -0.31 0.74 0.23 0.16 0.33 nan 0.76 nan -0.1 0.84 0.13 0.38 -0.28 0.48 0.12 -0.07 0.03 0.78 0.03 0.43 0.81 0.65 0.12 0.05 1.02 0.22 0.29 0.26 0.71 1.65 1.04 0.6 0.07 0.38 -0.12 0.16 0.44 0.08 nan -0.09 0.22 0.17 0.16 0.03 -0.18 nan 0.22 0.55 nan 0.41 0.51 1.12 2.16 0.19 1.43 0.21 0.01 0.26 -0.03 0.1 0.02 -0.…	0.15671641791044774 0.20895522388059704 0.1791044776119403 0.007462686567164179 -0.08955223880597014 -0.05970149253731343 0.07462686567164178 0.1791044776119403 0.20895522388059704 nan 0.18656716417910446 1.1567164179104477 0.08955223880597014 0.11940298507462686 0.08208955223880597 nan 0.1791044776119403 -0.007462686567164179 0.26119402985074625 0.8134328358208955 0.11940298507462686 2.402985074…	[0.22487948834896088, 0.23281383514404297, 0.2938557267189026, 0.35163968801498413, 0.2961067855358124, 0.24344508349895477, 0.22997835278511047, 0.21885138750076294, 0.2167123258113861, 0.12044079601764679, 0.022324565798044205, 0.060835517942905426, 0.10798238217830658, 0.5673161745071411, 0.5574918985366821, 0.13397523760795593, 0.10862823575735092, 0.05269933491945267, 0.3820425271987915, 0.3…	[0.35438859462738037, 0.5392981767654419, 0.30850744247436523, 0.13196034729480743, 0.21288350224494934, 0.1845504343509674, 0.1623435616493225, 0.05469132959842682, 0.03471894562244415, 0.04103613644838333, 0.06299705058336258, 0.11341550946235657, 0.16086983680725098, 0.15283828973770142, 0.13719387352466583, 0.29481446743011475, 0.3726184666156769, 0.720673143863678, 0.6340814828872681, 0.2065…	0
3484051	3484113	+	63	Y	CUUCCCAGGUAGCGGGAAGCAUAUUUCGGCAAUCCAGAGACAGCGGCGUUAUCUGGCUCUGGA	0.42 -0.03 0.29 -0.13 0.08 -0.04 0.44 -0.16 0.58 0.57 0.8 1.03 0.18 0.11 0.19 -0.17 0.26 0.11 0.02 nan 1.72 1.65 4.56 0.11 1.52 2.7 0.24 0.11 0.13 0.19 -0.58 0.83 -0.55 0.02 0.3 -0.15 0.27 -0.0 0.11 0.53 0.18 0.08 0.29 0.88 2.53 -0.12 0.93 0.38 0.91 nan 2.38 1.68 0.27 0.09 -0.32 nan 0.08 -0.56 0.02 -0.02 -0.13 -0.01 0.02	0.3134328358208955 -0.022388059701492536 0.21641791044776115 -0.09701492537313433 0.05970149253731343 -0.029850746268656716 0.3283582089552239 -0.11940298507462686 0.4328358208955223 0.42537313432835816 0.5970149253731343 0.7686567164179104 0.13432835820895522 0.08208955223880597 0.1417910447761194 -0.12686567164179105 0.19402985074626866 0.08208955223880597 0.014925373134328358 nan 1.28358208955…	[0.048083171248435974, 0.045133233070373535, 0.030617617070674896, 0.0033387355506420135, 0.003145664930343628, 0.023572631180286407, 0.6953935027122498, 0.8105025291442871, 0.6768324375152588, 0.9717378616333008, 0.5721675753593445, 0.9284363985061646, 0.7005510926246643, 0.04298243671655655, 0.033723682165145874, 0.07282975316047668, 0.022357475012540817, 0.02135314792394638, 0.0779875889420509…	[0.06063064932823181, 0.017311766743659973, 0.015570759773254395, 0.030038997530937195, 0.025759756565093994, 0.04346823692321777, 1.0038270950317383, 0.24610260128974915, 0.21710523962974548, 0.40651094913482666, 0.9163621664047241, 0.3742014169692993, 0.6551845669746399, 0.10715974867343903, 0.04028715193271637, 0.04107789695262909, 0.13082149624824524, 0.13156574964523315, 0.08081179857254028,…	0
3911734	3911774	-	41	Y	CCCCACUCUCUACAAGGCUCGGGGCGCCCGAAAAAACGGGC	-0.03 -0.16 -0.1 -0.03 4.63 -0.03 2.66 -0.06 0.11 -0.03 0.0 -0.1 0.58 1.25 -0.01 0.72 0.21 0.72 0.27 -0.08 -0.13 -0.03 0.53 0.6 0.82 0.3 0.11 0.22 -0.16 nan 2.53 0.71 -0.08 0.05 -0.03 0.05 -0.01 -0.27 -0.04 0.06 -0.05	-0.03731343283582089 0.04477611940298507 -0.029850746268656716 -0.20149253731343283 -0.007462686567164179 0.03731343283582089 -0.022388059701492536 0.03731343283582089 -0.05970149253731343 0.5298507462686567 1.888059701492537 nan -0.11940298507462686 0.16417910447761194 0.08208955223880597 0.22388059701492535 0.6119402985074626 0.4477611940298507 0.39552238805970147 -0.022388059701492536 -0.09701…	[0.004959605634212494, 0.0004663504660129547, 0.002043008804321289, 0.008783500641584396, 0.2469901293516159, 0.15447038412094116, 0.24186599254608154, 0.029481198638677597, 0.0893225222826004, 0.18461722135543823, 0.4227556884288788, 0.7497518062591553, 0.287284791469574, 0.5097602009773254, 0.43291231989860535, 0.17571371793746948, 0.07661519199609756, 0.3615609407424927, 0.49879831075668335, 0…	[0.015227347612380981, 0.0028745681047439575, 0.007740870118141174, 0.04421812295913696, 0.7789437770843506, 0.6844074726104736, 0.03632177412509918, 0.06649191677570343, 0.050886370241642, 0.33687543869018555, 0.1845877319574356, 0.7405694723129272, 0.6245954036712646, 0.5086487531661987, 0.27633136510849, 0.039370790123939514, 0.03828743100166321, 0.9589092135429382, 0.09090092778205872, 0.9481…	0
3911797	3911828	-	32	Y	UGGGAUGAGGAGAUAACAUAAUCUCCCUCCCA	nan -0.03 -0.28 -0.09 -0.09 nan 0.0 nan -0.06 -0.61 0.01 -0.02 -0.81 1.33 0.99 0.13 0.38 0.3 2.17 0.3 0.52 -0.74 0.45 nan 0.48 0.14 0.26 -0.31 -0.0 0.51 -0.26 0.63	0.47014925373134325 -0.19402985074626866 0.3805970149253731 -0.0 -0.23134328358208953 0.19402985074626866 0.10447761194029852 0.3582089552238806 nan 0.33582089552238803 -0.5522388059701492 0.3880597014925373 0.22388059701492535 1.6194029850746268 0.22388059701492535 0.2835820895522388 0.09701492537313433 0.7388059701492536 0.9925373134328358 -0.6044776119402985 -0.014925373134328358 0.00746268656…	[0.10265365242958069, 0.00798778235912323, 0.0038308538496494293, 0.038219720125198364, 0.2652946710586548, 0.35535481572151184, 0.3758399486541748, 0.7986025214195251, 0.4328760504722595, 0.07332956045866013, 0.02689456194639206, 0.033720582723617554, 0.08490388095378876, 0.40558257699012756, 0.7822803854942322, 0.521598756313324, 0.6784831285476685, 0.869539201259613, 0.9985994100570679, 0.8513…	[0.04231448471546173, 0.05261015146970749, 0.038998499512672424, 0.04970960319042206, 0.1359584480524063, 0.16988426446914673, 0.18053951859474182, 0.815743088722229, 0.09070812910795212, 0.0474543422460556, 0.12055686116218567, 0.05005234479904175, 0.0821189284324646, 0.08914750069379807, 0.8438386917114258, 1.0030272006988525, 1.0038949251174927, 1.0019385814666748, 0.4455164670944214, 0.884701…	0
3964270	3964382	+	113	Y	UUUCUGGCUCGUCACUCAAUCCGUCUUGUCGUUUCAGUUCUGCGUACUCUCCUGUGACCAGGCAGCGAAAAGACAUGAGUCGAUGACCGUAAACAGGCAUGGAUGAUCCUGCC	0.1 0.16 3.24 0.43 0.86 0.18 0.77 2.04 0.03 0.69 0.09 -0.28 0.01 0.29 0.09 0.14 0.72 0.06 2.41 1.38 0.22 1.93 0.06 -0.38 0.15 1.16 0.59 1.1 -0.81 0.2 nan 0.17 0.07 1.76 0.05 1.79 -0.19 0.39 0.5 0.27 0.05 -0.32 -0.25 0.07 0.25 0.38 -0.02 -0.06 0.36 1.89 -0.04 0.25 nan 1.23 0.04 0.0 0.03 0.09 nan 0.12 0.3 nan 0.2 0.19 -0.11 -0.43 -0.77 -0.15 nan -0.13 0.49 0.27 -0.16 0.08 nan nan 0.06 -0.18 0.04 0.…	0.07462686567164178 0.11940298507462686 2.417910447761194 0.3208955223880597 0.6417910447761194 0.13432835820895522 0.5746268656716418 1.5223880597014925 0.022388059701492536 0.5149253731343283 0.06716417910447761 -0.20895522388059704 0.007462686567164179 0.21641791044776115 0.06716417910447761 0.10447761194029852 0.5373134328358209 0.04477611940298507 1.7985074626865671 1.0298507462686566 0.1641…	[0.16753819584846497, 0.399823397397995, 0.18389654159545898, 0.27951037883758545, 0.33126646280288696, 0.15301884710788727, 0.062192171812057495, 0.5535675287246704, 0.14829887449741364, 0.0917201042175293, 0.07812460511922836, 0.06687867641448975, 0.03771320730447769, 0.08210556209087372, 0.07380136847496033, 0.05536840856075287, 0.03544551134109497, 0.24184970557689667, 0.8723816275596619, 0.7…	[0.07097943127155304, 0.07696099579334259, 0.06649424880743027, 0.6211045980453491, 0.19875425100326538, 0.10490894317626953, 0.1666853427886963, 1.003833293914795, 0.06630303710699081, 0.12809047102928162, 0.12058264762163162, 0.09024574607610703, 0.20399609208106995, 0.3672429323196411, 0.16675561666488647, 0.0790175348520279, 0.19490167498588562, 0.43304353952407837, 0.745769739151001, 0.35834…	0
4178966	4179013	+	48	Y	CAGCCUGAGAAAUCAGGCUGAUGGCUGGUGACUUUUUAGUCACCAGCC	0.25 0.36 0.11 -0.27 0.07 -0.07 -0.32 -0.08 1.35 -0.05 1.06 1.18 -0.11 0.06 -0.2 0.08 -0.04 0.08 0.0 1.12 nan 1.02 0.01 -0.01 0.15 0.5 0.03 0.17 0.01 -0.29 0.31 0.53 -0.12 -0.01 0.05 -0.34 0.66 0.21 -1.14 0.12 -0.37 -0.5 0.25 -0.08 -0.03 0.02 -0.13 -0.05	0.18656716417910446 0.26865671641791045 0.08208955223880597 -0.20149253731343283 0.05223880597014926 -0.05223880597014926 -0.23880597014925373 -0.05970149253731343 1.007462686567164 -0.03731343283582089 0.7910447761194029 0.880597014925373 -0.08208955223880597 0.04477611940298507 -0.14925373134328357 0.05970149253731343 -0.029850746268656716 0.05970149253731343 0.0 0.8358208955223881 nan 0.761194…	[0.016259491443634033, 0.009340602904558182, 0.01152559369802475, 0.005904596298933029, 0.010227218270301819, 0.010153237730264664, 0.1365979015827179, 0.35578733682632446, 1.0065903663635254, 0.8969162702560425, 0.9545804262161255, 0.9365313053131104, 0.5274421572685242, 0.03340831771492958, 0.018047630786895752, 0.01214585080742836, 0.0063561201095581055, 0.016784455627202988, 0.014571264386177…	[0.028512567281723022, 0.12222856283187866, 0.0880819708108902, 0.020531877875328064, 0.014125153422355652, 0.05682472884654999, 0.08313615620136261, 0.7532868981361389, 0.24733459949493408, 1.0045173168182373, 1.0022530555725098, 0.9827488660812378, 0.1190059706568718, 0.03766371309757233, 0.1477709412574768, 0.07312297075986862, 0.09350230544805527, 0.025139570236206055, 0.03253261744976044, 0.…	100
4179072	4179191	+	120	Y	CAAUGCUUGUUUCUAUCGACGACUUAAUAUACUGCGACAGGACGUCCGUUCUGUGUAAAUCGCAAUGAAAUGGUUUAAGCGUGAUAGCAACAGGCAUUGCGGAAAGUGUUCCAUUUUCCG	nan 0.03 -0.2 -1.02 0.09 -0.12 nan -0.08 nan 0.1 0.02 nan 0.02 0.01 0.0 -0.02 -0.16 nan 0.06 0.14 0.27 nan 0.16 -1.18 -0.05 -0.05 -0.62 0.34 0.02 nan 0.51 0.28 -0.14 0.01 0.1 0.54 -0.22 0.39 -0.21 0.04 0.47 0.45 0.02 2.04 nan 0.82 0.38 -0.01 -0.1 0.48 0.03 -0.05 -0.05 0.03 1.18 0.08 0.07 0.34 1.01 0.86 -0.02 -0.25 -0.28 0.07 nan -0.06 0.46 0.23 0.46 2.3 1.12 0.43 nan 0.24 -0.19 0.07 -0.01 -0.21 0…	nan 0.022388059701492536 -0.14925373134328357 -0.7611940298507462 0.06716417910447761 -0.08955223880597014 nan -0.05970149253731343 nan 0.07462686567164178 0.014925373134328358 nan 0.014925373134328358 0.007462686567164179 0.0 -0.014925373134328358 -0.11940298507462686 nan 0.04477611940298507 0.10447761194029852 0.20149253731343283 nan 0.11940298507462686 -0.880597014925373 -0.03731343283582089 -…	[0.08315330743789673, 0.02636992558836937, 0.01932447776198387, 0.007176250219345093, 0.01033182442188263, 0.010264240205287933, 0.05217335373163223, 0.03448732569813728, 0.02307489886879921, 0.07108935713768005, 0.09039370715618134, 0.07833462953567505, 0.011847838759422302, 0.03402993083000183, 0.02324267104268074, 0.04328158125281334, 0.15714490413665771, 0.6197019219398499, 0.1801325678825378…	[0.2114887535572052, 0.1272953748703003, 0.07801412045955658, 0.041778564453125, 0.16400010883808136, 0.06079040467739105, 0.016211748123168945, 0.046502694487571716, 0.09211793541908264, 0.04276442527770996, 0.058036915957927704, 0.15317808091640472, 0.05937579274177551, 0.04795956611633301, 0.07485652714967728, 0.050637856125831604, 0.1400350034236908, 0.2144647091627121, 0.881064772605896, 0.2…	0
4398597	4398669	+	73	Y	AGGACAGCGAAGAAACCGAAUAAGGUUUCGGGCUGUUUUUUUACACGGGGAGCCAGCGAUCCUGCGUUCCCCG	0.15 0.05 0.47 0.15 -0.02 -0.01 0.14 0.19 0.04 0.33 0.15 -0.38 -0.02 0.11 -0.08 0.02 0.34 0.84 0.33 1.39 0.91 0.06 3.21 0.08 0.36 -0.01 0.15 0.06 -0.03 -0.13 0.12 -0.29 -0.11 -0.15 0.49 -0.1 nan 0.18 0.27 0.02 1.01 0.01 0.59 0.23 0.04 0.04 -0.17 -0.04 -0.17 -0.2 -0.11 nan 0.0 0.03 -0.12 0.1 nan 0.12 0.02 0.82 0.1 -0.05 -0.1 0.27 nan nan nan nan nan nan nan nan nan	0.11194029850746268 0.03731343283582089 0.3507462686567164 0.11194029850746268 -0.014925373134328358 -0.007462686567164179 0.10447761194029852 0.1417910447761194 0.029850746268656716 0.2462686567164179 0.11194029850746268 -0.2835820895522388 -0.014925373134328358 0.08208955223880597 -0.05970149253731343 0.014925373134328358 0.2537313432835821 0.626865671641791 0.2462686567164179 1.037313432835820…	[0.14831647276878357, 0.11550584435462952, 0.09026249498128891, 0.040858007967472076, 0.01904023438692093, 0.01435595378279686, 0.10580307990312576, 0.18441098928451538, 0.8062095046043396, 0.524924099445343, 0.32435154914855957, 0.17943967878818512, 0.07666934281587601, 0.16908934712409973, 0.07489459961652756, 0.037695303559303284, 0.03318343684077263, 0.2784670889377594, 0.5026378631591797, 0.…	[0.41316258907318115, 0.05043193697929382, 0.05924668908119202, 0.1439882516860962, 0.06449722498655319, 0.15006309747695923, 0.1646849811077118, 0.1282433122396469, 0.20162290334701538, 0.7750665545463562, 0.749382734298706, 0.08763407915830612, 0.17228709161281586, 0.12489582598209381, 0.10403051972389221, 0.05187270790338516, 0.040374815464019775, 0.12170445173978806, 0.876603901386261, 0.6851…	0
190774	190834	+	61	Y	GGGGGCCUGCAUAUGGCCCCCUUUUUCACUUUUAUAUCUGUGCGGUUUAAUGCCGGGCAGA	0.06 -0.12 0.03 -0.24 -0.08 nan nan 0.68 2.03 0.24 nan 0.93 nan 0.82 0.05 -0.17 0.25 -0.13 0.15 nan nan -0.03 0.17 0.02 0.04 0.08 0.0 0.01 0.04 -0.36 0.27 1.05 0.01 3.92 -0.87 0.09 0.25 0.03 -0.0 0.26 -0.15 1.5 0.27 -0.01 0.84 0.45 0.38 3.84 2.3 0.41 0.55 0.28 0.07 -0.41 0.94 0.03 0.84 -0.12 0.24 1.18 0.04	0.04477611940298507 -0.08955223880597014 0.022388059701492536 -0.1791044776119403 -0.05970149253731343 nan nan 0.5074626865671642 1.5149253731343282 0.1791044776119403 nan 0.6940298507462687 nan 0.6119402985074626 0.03731343283582089 -0.12686567164179105 0.18656716417910446 -0.09701492537313433 0.11194029850746268 nan nan -0.022388059701492536 0.12686567164179105 0.014925373134328358 0.0298507462…	[0.020324725657701492, 0.021814823150634766, 0.015181384980678558, 0.016825921833515167, 0.03122750297188759, 0.01607120782136917, 0.025794297456741333, 0.1470523476600647, 0.15018035471439362, 0.40079575777053833, 0.7104657292366028, 0.5751044750213623, 0.4674876928329468, 0.7334365248680115, 0.030135447159409523, 0.0029428452253341675, 0.001202259212732315, 0.00015195831656455994, 0.00010750070…	[0.14076820015907288, 0.09460988640785217, 0.11336466670036316, 0.10198048502206802, 0.18164017796516418, 0.09308917820453644, 0.06746262311935425, 0.1680648922920227, 0.4545768201351166, 1.0027871131896973, 0.8837693333625793, 0.4196455776691437, 0.5885339379310608, 0.24031923711299896, 0.06810493022203445, 0.04752512276172638, 0.023198246955871582, 0.015874043107032776, 0.005249768495559692, 0.…	0
1146753	1146818	+	66	Y	UCGCUAAGUAAUCACGCAUCUGCGUGAUGAAGCUUAGUGAGGAUUUUCCCCAGGCAACUGGGGAAA	0.18 -0.0 -0.33 0.07 0.26 0.17 0.45 0.17 0.13 0.22 0.16 -0.03 0.01 0.05 0.08 -0.06 0.07 1.29 2.23 nan 3.25 -0.02 0.07 -0.02 -0.11 0.01 0.05 0.19 nan 0.3 0.98 0.22 0.07 0.05 0.17 0.09 0.08 -0.15 0.39 1.06 -0.03 -0.03 -0.04 -0.23 0.01 0.04 0.04 -0.07 0.01 -0.03 0.01 0.0 0.05 0.27 0.43 1.3 0.66 0.06 -0.05 -0.04 nan 0.03 0.0 -0.02 0.0 0.04	0.13432835820895522 -0.0 -0.2462686567164179 0.05223880597014926 0.19402985074626866 0.12686567164179105 0.33582089552238803 0.12686567164179105 0.09701492537313433 0.16417910447761194 0.11940298507462686 -0.022388059701492536 0.007462686567164179 0.03731343283582089 0.05970149253731343 -0.04477611940298507 0.05223880597014926 0.9626865671641791 1.6641791044776117 nan 2.425373134328358 -0.0149253…	[0.14668741822242737, 0.07605528086423874, 0.006978332996368408, 0.027545519173145294, 0.005296140909194946, 0.0034820958971977234, 0.00495591014623642, 0.08856702595949173, 0.5417560338973999, 0.2453378587961197, 0.10066404938697815, 0.048125527799129486, 0.013667549937963486, 0.011394370347261429, 0.028674528002738953, 0.10773781687021255, 0.23329409956932068, 0.8838363885879517, 0.876617074012…	[0.04905769228935242, 0.07535254210233688, 0.20985820889472961, 0.0318131148815155, 0.025789156556129456, 0.04047319293022156, 0.08416004478931427, 0.07832621037960052, 0.24328100681304932, 0.7461745142936707, 0.25751346349716187, 0.02162449061870575, 0.02101212739944458, 0.0464472770690918, 0.027581825852394104, 0.1436750739812851, 0.25686025619506836, 1.0042665004730225, 0.4888465702533722, 1.0…	0
1300821	1300926	+	106	Y	ACAUUGUGAAGCACUAAUGGCAAUACGUGGGGCAGGAGUGUCCUGCUCCACGGUGUCUGAUUUUUAUCGCAUUACAGAAGGCACAGGCCAGAAGGUAGGGCAAUGU	0.01 -0.01 0.33 -0.36 0.46 1.9 0.07 2.13 -0.03 0.26 nan -0.02 0.22 0.22 0.52 0.18 0.59 0.09 0.13 -0.03 nan -0.68 0.35 0.57 0.32 0.24 0.2 0.07 -0.03 0.47 nan -0.11 -0.03 -0.0 0.26 0.84 1.32 2.75 2.1 8.44 0.02 -0.08 -0.0 0.44 -0.12 -0.16 2.3 0.03 0.27 0.13 0.03 0.13 -1.12 -0.13 0.12 0.46 -0.21 0.19 0.97 2.87 nan 0.05 0.16 0.29 0.26 1.78 0.83 0.18 0.68 0.11 0.06 0.04 1.04 0.55 -0.02 0.34 2.99 0.28 1…	0.007462686567164179 -0.007462686567164179 0.2462686567164179 -0.26865671641791045 0.34328358208955223 1.417910447761194 0.05223880597014926 1.58955223880597 -0.022388059701492536 0.19402985074626866 nan -0.014925373134328358 0.16417910447761194 0.16417910447761194 0.3880597014925373 0.13432835820895522 0.4402985074626865 0.06716417910447761 0.09701492537313433 -0.022388059701492536 nan -0.507462…	[0.1004822701215744, 0.05926002189517021, 0.10163315385580063, 0.1585606038570404, 0.31098097562789917, 0.16946588456630707, 0.37575483322143555, 0.7682958841323853, 0.6912464499473572, 0.7106170654296875, 0.5591599941253662, 0.6399902105331421, 0.08533468842506409, 0.39018651843070984, 0.3442053198814392, 0.22965797781944275, 0.15342074632644653, 0.15094789862632751, 0.04583361744880676, 0.02320…	[0.29726678133010864, 0.18664908409118652, 0.21519561111927032, 0.05784115195274353, 0.08394055813550949, 0.1271873116493225, 0.20699052512645721, 0.259111225605011, 0.998902440071106, 0.9609653353691101, 0.13795891404151917, 0.43260467052459717, 0.6997066140174866, 0.35653626918792725, 0.12329085916280746, 0.4718743860721588, 0.6713561415672302, 0.06909117102622986, 0.07040059566497803, 0.108688…	0
2657466	2657571	-	106	Y	AACCCCACCGUGGUCGCCUGCGCGUGGGGUUUGUUUUACCUGAUUCGCCGUUAUCGCGGCGGAUCGCAGCCCUGAGAAUGUUAUGGAUUACUUCACCCUCUUUGGC	-0.11 -0.1 0.04 0.46 0.33 0.0 0.24 -0.03 -0.76 -0.19 -0.79 -0.8 1.57 1.58 2.12 0.24 1.04 0.04 0.57 -0.29 -0.08 -0.06 0.76 0.13 0.51 0.43 -0.2 0.16 -0.77 -0.03 -0.26 -0.21 0.65 0.03 -0.02 0.48 0.19 -0.05 -0.02 -0.24 1.95 0.0 -0.25 0.04 0.9 0.06 0.17 -0.04 0.05 1.31 -0.22 0.41 2.18 1.0 0.12 0.28 -0.07 0.09 -0.05 0.41 -0.25 nan 0.03 0.24 -0.12 nan 0.49 0.81 -0.35 -0.24 -0.02 0.37 0.38 -0.02 -1.02 -0…	nan 0.1791044776119403 0.39552238805970147 0.626865671641791 0.1417910447761194 0.47761194029850745 -0.41044776119402987 -0.39552238805970147 0.2835820895522388 0.05223880597014926 -0.08955223880597014 0.8880597014925372 0.05223880597014926 0.8582089552238805 0.3582089552238806 0.3134328358208955 0.582089552238806 0.12686567164179105 0.05970149253731343 0.3059701492537313 0.6940298507462687 0.335…	[0.04495697095990181, 0.012920025736093521, 0.0027065537869930267, 0.0007857009768486023, 0.0009290911257266998, 0.001257292926311493, 0.010597791522741318, 0.0043447017669677734, 0.02553020417690277, 0.03249999135732651, 0.14021188020706177, 0.0886128842830658, 0.10855668783187866, 0.7145216464996338, 0.688206136226654, 0.5246992707252502, 0.36849671602249146, 0.1727454662322998, 0.2289711534976…	[0.09873346239328384, 0.06755178421735764, 0.05789269506931305, 0.04739841818809509, 0.05094669759273529, 0.05320347845554352, 0.14417009055614471, 0.08411269634962082, 0.16358700394630432, 0.11164973676204681, 0.10376482456922531, 0.13644538819789886, 0.23978829383850098, 0.3703575134277344, 0.9759543538093567, 0.39255398511886597, 0.9976481199264526, 0.2910389006137848, 0.13512137532234192, 0.1…	0
2744229	2744265	-	37	Y	GACACCGGACUCCGUUCCUCGAUGGGGUCCGGUUGUU	nan nan nan -0.55 1.26 0.01 -0.01 -0.69 0.15 0.08 nan 0.26 -0.06 nan 0.17 0.52 0.33 1.12 0.19 0.03 0.36 0.2 0.64 0.37 0.16 nan 0.1 0.2 0.07 -0.03 -0.2 0.17 -0.06 -0.37 0.06 0.17 nan	nan 0.12686567164179105 0.04477611940298507 -0.2761194029850746 -0.04477611940298507 0.12686567164179105 -0.14925373134328357 -0.022388059701492536 0.05223880597014926 0.14925373134328357 0.07462686567164178 nan 0.11940298507462686 0.2761194029850746 0.47761194029850745 0.14925373134328357 0.26865671641791045 0.022388059701492536 0.1417910447761194 0.8358208955223881 0.2462686567164179 0.38805970…	[0.10799635946750641, 0.0317060723900795, 0.037919383496046066, 0.05891675502061844, 0.03752004727721214, 0.048636630177497864, 0.05748530477285385, 0.031060924753546715, 0.07542985677719116, 0.0614364817738533, 0.19902536273002625, 0.06473009288311005, 0.02706899121403694, 0.14035779237747192, 0.471576064825058, 0.63941890001297, 0.3793891966342926, 0.48513853549957275, 0.7566701769828796, 0.507…	[0.1009172648191452, 0.3462262749671936, 0.2446972280740738, 0.3487892746925354, 0.18147079646587372, 0.09696642309427261, 0.05870647728443146, 0.04436032474040985, 0.23390431702136993, 0.13167838752269745, 0.09386581927537918, 0.07761745154857635, 0.09364141523838043, 0.2799909710884094, 0.2022428810596466, 0.20680615305900574, 0.8545137047767639, 0.8559103012084961, 0.23383979499340057, 1.00211…	0
3347165	3347204	+	40	Y	UCCACGCCUGACGGCUACGCACGUAGCCCGAUGGCGAGGA	-0.65 0.2 -0.08 nan 0.03 -0.08 -0.06 0.19 -0.23 0.02 0.1 -0.19 0.15 -0.41 -0.01 -0.04 -0.12 -0.04 0.6 1.59 nan 1.92 0.32 0.01 0.08 -0.27 -0.25 -0.09 0.0 0.85 nan nan -0.14 -0.15 0.22 -0.03 nan 0.01 -0.2 -0.01	-0.48507462686567165 0.14925373134328357 -0.05970149253731343 nan 0.022388059701492536 -0.05970149253731343 -0.04477611940298507 0.1417910447761194 -0.17164179104477612 0.014925373134328358 0.07462686567164178 -0.1417910447761194 0.11194029850746268 -0.3059701492537313 -0.007462686567164179 -0.029850746268656716 -0.08955223880597014 -0.029850746268656716 0.4477611940298507 1.1865671641791045 nan …	[0.08641098439693451, 0.026347342878580093, 0.01228277012705803, 0.16319988667964935, 0.04048061743378639, 0.022435083985328674, 0.012018077075481415, 0.023527488112449646, 0.2739659547805786, 0.6004571318626404, 0.14742021262645721, 0.09459203481674194, 0.028199702501296997, 0.02373843640089035, 0.032442521303892136, 0.10119575262069702, 0.05431182682514191, 0.09785766899585724, 0.57453858852386…	[0.07037542015314102, 0.02981927990913391, 0.05225512385368347, 0.5662304162979126, 0.08676017075777054, 0.1484777331352234, 0.038044899702072144, 0.04643926024436951, 0.19159965217113495, 0.264676034450531, 1.0011311769485474, 0.8198959231376648, 0.08294167369604111, 0.045771241188049316, 0.05230569839477539, 0.03866419196128845, 0.10770516097545624, 0.10512650012969971, 0.4880971908569336, 1.00…	0
3780609	3780640	-	32	Y	AUGACCCGGCCCGCGCAGAACGGGCCGGUCAU	0.65 -0.19 0.15 0.18 -0.11 0.1 -0.0 -0.13 -0.61 0.17 0.03 0.02 1.02 -0.03 -0.01 0.22 nan 0.28 0.52 0.02 0.0 -0.61 0.18 nan 0.09 0.0 -0.13 nan -0.73 -0.12 -0.03 0.21	0.15671641791044774 -0.022388059701492536 -0.08955223880597014 -0.544776119402985 nan -0.09701492537313433 0.0 0.06716417910447761 nan 0.13432835820895522 -0.4552238805970149 0.0 0.014925373134328358 0.3880597014925373 0.20895522388059704 nan 0.16417910447761194 -0.007462686567164179 -0.022388059701492536 0.7611940298507462 0.014925373134328358 0.022388059701492536 0.12686567164179105 -0.45522388…	[0.1906232088804245, 0.17917048931121826, 0.05243612080812454, 0.14230096340179443, 0.2689290940761566, 0.3414933681488037, 0.2799355387687683, 0.15943799912929535, 0.07199574261903763, 0.06369389593601227, 0.08971244841814041, 0.22266337275505066, 0.27762776613235474, 0.26212581992149353, 0.4620405435562134, 0.7371701598167419, 0.5850540399551392, 0.6349279880523682, 0.5235937833786011, 0.328092…	[0.17949694395065308, 0.03126820921897888, 0.058198750019073486, 0.16969631612300873, 0.4531330168247223, 0.2991390824317932, 0.5540401935577393, 0.22440466284751892, 0.07625789195299149, 0.04676873981952667, 0.04020234942436218, 0.07243984937667847, 0.19076909124851227, 0.8458901643753052, 0.5735877156257629, 1.0010236501693726, 0.9861294031143188, 0.15170961618423462, 0.8955968618392944, 0.5641…	0
4183290	4183365	+	76	Y	CGAGUAAUUCUCGCUCAAACAGGUCACUGCUGUCGGGUUAAAACCCGGCAGCGGAUUGUGCUAACUCCGACGGGAG	0.61 0.04 0.06 0.21 0.36 0.34 0.47 1.09 0.62 0.24 0.35 0.08 0.84 0.18 0.58 0.65 0.11 0.3 0.87 0.19 -0.02 0.19 0.05 0.67 0.15 0.45 0.35 nan -0.06 0.09 -0.07 0.11 nan -0.27 -0.08 0.02 0.25 0.2 1.47 0.3 nan -0.03 0.29 0.03 -0.07 0.04 0.06 nan -0.01 -0.02 0.36 0.03 nan 0.04 0.82 0.11 0.73 0.62 -0.2 -0.11 0.03 0.52 0.16 0.36 0.29 -0.25 0.05 0.12 0.75 1.96 0.1 nan 0.52 0.42 0.29 -0.17	0.4552238805970149 0.029850746268656716 0.04477611940298507 0.15671641791044774 0.26865671641791045 0.2537313432835821 0.3507462686567164 0.8134328358208955 0.46268656716417905 0.1791044776119403 0.26119402985074625 0.05970149253731343 0.626865671641791 0.13432835820895522 0.4328358208955223 0.48507462686567165 0.08208955223880597 0.22388059701492535 0.6492537313432836 0.1417910447761194 -0.01492…	[0.18953189253807068, 0.035401370376348495, 0.047381896525621414, 0.13610006868839264, 0.709804892539978, 0.6204653382301331, 0.8170773386955261, 0.9873614311218262, 0.5123364329338074, 0.1918521672487259, 0.10071101784706116, 0.14397257566452026, 0.21703296899795532, 0.4952198266983032, 0.5196624994277954, 0.5283606052398682, 0.6775500774383545, 0.9674733281135559, 0.651896595954895, 0.383898317…	[0.2649129033088684, 0.07340255379676819, 0.21199272572994232, 0.07215586304664612, 0.3158443868160248, 0.8996877670288086, 1.0007611513137817, 0.2903347611427307, 0.1488390564918518, 0.12589019536972046, 0.034275367856025696, 0.12778300046920776, 0.1475902795791626, 0.9427232146263123, 0.1709955632686615, 0.7498742938041687, 0.8510372042655945, 0.7909624576568604, 0.7225081324577332, 0.827633619…	0
192799	192840	+	42	Y	GGCUAUACUUAGCACACUUCCACUGUGUGUGACUGUCUGGUC	-0.12 -0.48 0.21 -0.57 0.06 0.05 0.02 0.31 0.51 0.11 0.44 1.28 0.01 -0.09 -0.03 -0.02 -0.03 3.89 1.27 0.81 -0.07 0.81 2.2 0.17 0.36 0.07 0.05 -0.4 0.26 -0.16 nan nan 0.18 0.23 -0.05 0.58 0.76 0.03 0.17 0.5 nan 0.52	-0.08955223880597014 -0.3582089552238806 0.15671641791044774 -0.42537313432835816 0.04477611940298507 0.03731343283582089 0.014925373134328358 0.23134328358208953 0.3805970149253731 0.08208955223880597 0.3283582089552239 0.9552238805970149 0.007462686567164179 -0.06716417910447761 -0.022388059701492536 -0.014925373134328358 -0.022388059701492536 2.9029850746268657 0.9477611940298507 0.60447761194…	[0.18257573246955872, 0.0005514398217201233, 0.04864811524748802, 0.10115930438041687, 0.07542348653078079, 0.10710842907428741, 0.3883335292339325, 0.18931052088737488, 0.45624279975891113, 0.6653584241867065, 0.12248431146144867, 0.09515075385570526, 0.03751172870397568, 0.013744089752435684, 0.003222517669200897, 0.014938268810510635, 0.14453044533729553, 0.8780378699302673, 0.8030552268028259…	[0.048416346311569214, 0.1021493673324585, 0.20376995205879211, 0.05581212043762207, 0.303951621055603, 0.12056922912597656, 0.32801270484924316, 0.6611417531967163, 0.14757725596427917, 0.1733919382095337, 1.0029045343399048, 0.1678512692451477, 0.17029213905334473, 0.39764946699142456, 0.2816961407661438, 0.29784324765205383, 0.29773759841918945, 0.18966719508171082, 0.26799964904785156, 0.9472…	0
208285	208377	+	93	Y	GUCAGCUUUGAUGACUUCAGCGGUGGGCUUAAAAUGACCGCUCGCGAAGUGAUGGAUAUUGACGAAGCCCGGGAAAAAUAUGCUCGCGGGCUU	1.23 -0.14 0.28 nan nan 1.15 nan 0.69 1.74 3.05 0.59 0.39 0.26 -0.04 0.68 0.34 0.07 0.37 0.67 -0.31 0.16 -0.07 0.71 0.07 -0.02 0.06 nan -0.38 -0.12 4.13 0.65 0.1 0.0 0.13 0.71 0.7 0.27 0.0 nan -0.49 0.05 0.06 -0.05 0.52 nan -0.24 0.28 0.18 0.37 0.2 nan 0.17 0.14 0.27 0.04 0.37 0.41 1.52 -0.12 -0.18 0.41 -0.12 0.82 1.89 nan 0.16 0.26 -0.03 0.1 -0.51 0.35 0.09 0.75 0.99 0.96 0.34 0.12 0.06 3.4 1.33…	0.917910447761194 -0.10447761194029852 0.20895522388059704 nan nan 0.8582089552238805 nan 0.5149253731343283 1.2985074626865671 2.276119402985074 0.4402985074626865 0.291044776119403 0.19402985074626866 -0.029850746268656716 0.5074626865671642 0.2537313432835821 0.05223880597014926 0.2761194029850746 0.5 -0.23134328358208953 0.11940298507462686 -0.05223880597014926 0.5298507462686567 0.0522388059…	[0.028567742556333542, 0.039669767022132874, 0.01614893600344658, 0.06857088208198547, 0.1310000717639923, 0.45354512333869934, 0.6580195426940918, 0.42739927768707275, 0.42878761887550354, 0.4640669822692871, 0.26587581634521484, 0.24500176310539246, 0.27863532304763794, 0.30387863516807556, 0.003652714192867279, 0.01104043796658516, 0.013166680932044983, 0.20014244318008423, 0.5415504574775696,…	[0.06411856412887573, 0.054130032658576965, 0.08221237361431122, 0.24994242191314697, 0.14384430646896362, 0.955672562122345, 0.1340545415878296, 0.13481909036636353, 0.17132550477981567, 0.12050844728946686, 0.33299607038497925, 0.08405893296003342, 0.12142381072044373, 0.25650346279144287, 0.0559195950627327, 0.024825528264045715, 0.025173157453536987, 0.12511280179023743, 0.9223624467849731, 0…	0
208436	208599	+	164	Y	CUCUGGAACCCCACCGCUCUGGGACAAUUCCAGUACAUCUCUACUAUCAGAGGGCGGAUGCACGCGCGCGGUUGCGUUUUGGCGCGACGUGGCGUGUCUCUCCGAGCGAUCGUUUAUUAAACGAUCUCCGUGGCCUCAUUGGUUCGGAGCAGGUGGAACUGGAG	0.5 nan 0.17 -0.15 0.26 0.46 0.74 0.41 0.75 0.39 0.26 0.14 -0.56 -0.41 0.85 0.26 -0.15 nan 0.19 0.48 0.14 0.03 0.03 0.03 0.01 -0.05 nan 0.32 0.54 0.95 0.02 0.24 0.02 0.2 0.32 0.15 1.11 0.78 0.23 0.22 0.25 0.74 5.61 -0.04 0.83 0.78 1.77 0.81 0.85 0.12 0.85 0.08 0.32 0.64 1.74 0.23 -0.5 -0.0 0.12 0.14 0.71 0.38 -0.09 1.66 0.2 1.71 -0.05 0.21 0.06 0.02 2.58 1.13 nan 0.06 0.25 -0.22 -0.04 0.33 0.53 1…	0.3731343283582089 nan 0.12686567164179105 -0.11194029850746268 0.19402985074626866 0.34328358208955223 0.5522388059701492 0.3059701492537313 0.5597014925373134 0.291044776119403 0.19402985074626866 0.10447761194029852 -0.41791044776119407 -0.3059701492537313 0.6343283582089552 0.19402985074626866 -0.11194029850746268 nan 0.1417910447761194 0.3582089552238806 0.10447761194029852 0.022388059701492…	[0.08894676715135574, 0.05380764976143837, 0.06894626468420029, 0.1110270619392395, 0.1314968466758728, 0.19935321807861328, 0.5531817674636841, 0.5403745770454407, 0.14115749299526215, 0.051246341317892075, 0.02396509423851967, 0.008497428148984909, 0.0996960997581482, 0.025966856628656387, 0.05017322674393654, 0.08182057738304138, 0.06672431528568268, 0.046189796179533005, 0.05904165282845497, …	[0.15136387944221497, 0.08435556292533875, 0.1010018140077591, 0.08974216878414154, 0.08888862282037735, 0.08982467651367188, 0.880024790763855, 0.8479036688804626, 0.8793191909790039, 0.7669918537139893, 0.07685831934213638, 0.11101970821619034, 0.33630234003067017, 0.278669148683548, 0.2530710995197296, 0.11040433496236801, 0.22171688079833984, 0.0779624730348587, 0.10631101578474045, 0.0863606…	0
962885	962967	+	83	Y	CGAGUAAUUCUCUGACUCUUCGGGAUUUUUAUUCCGAAGUUUGUUGAGUUUACUUGACAGAUUGCAGGUUUCGUCCUGUAAUC	0.21 -0.06 0.01 -0.09 -0.06 0.05 0.86 1.46 0.11 0.01 -0.68 0.13 0.69 0.1 nan -0.01 -0.16 -0.12 -0.05 0.02 -0.1 0.02 0.08 -0.03 0.09 0.04 0.23 0.13 0.22 0.33 0.36 0.03 -0.05 0.02 0.02 0.09 0.02 0.03 0.42 0.19 0.62 0.42 0.81 -0.0 0.13 -0.04 -0.02 0.22 -0.0 -0.08 0.04 0.03 0.15 0.09 0.19 1.46 -0.03 0.06 1.11 0.15 -0.03 -0.03 0.09 nan 0.01 0.0 0.06 -0.37 0.37 1.24 0.49 0.1 0.37 0.54 -0.06 -0.01 0.06 …	0.15671641791044774 -0.04477611940298507 0.007462686567164179 -0.06716417910447761 -0.04477611940298507 0.03731343283582089 0.6417910447761194 1.08955223880597 0.08208955223880597 0.007462686567164179 -0.5074626865671642 0.09701492537313433 0.5149253731343283 0.07462686567164178 nan -0.007462686567164179 -0.11940298507462686 -0.08955223880597014 -0.03731343283582089 0.014925373134328358 -0.074626…	[0.1630866974592209, 0.061653584241867065, 0.021543215960264206, 0.02376469597220421, 0.08219034969806671, 0.08239410072565079, 0.2786085307598114, 0.6776109337806702, 0.3328011631965637, 0.10007762163877487, 0.030153024941682816, 0.1415846049785614, 0.29353249073028564, 0.4216794967651367, 0.33132025599479675, 0.06476607173681259, 0.05143275484442711, 0.021072842180728912, 0.13500571250915527, 0…	[0.29252415895462036, 0.08535943180322647, 0.22366100549697876, 0.04990890622138977, 0.0548274964094162, 0.2011195868253708, 0.2683747112751007, 0.29063236713409424, 0.15350043773651123, 0.1692410409450531, 0.13083241879940033, 0.19356898963451385, 0.3180483281612396, 0.15798860788345337, 0.3673640191555023, 0.38858485221862793, 0.14530320465564728, 0.1292841136455536, 0.05214439332485199, 0.0268…	0
1261129	1261237	-	109	Y	UGAGUUUCGGUGACAACGUCACCUUGUUCCAGACGUUGCAUCGCGCUCUUUAAUACACCGCCUGGAAAGGAUCAUGCCUGGCCCGCACAGUUUUCGGCAGAUUCUUUCC	1.74 0.23 0.04 0.24 1.06 0.65 0.93 0.33 0.08 -0.04 0.15 0.94 0.84 0.1 0.16 0.05 0.03 0.15 0.07 0.09 2.62 1.08 0.78 0.66 2.13 4.76 0.57 0.85 1.19 0.11 1.02 0.03 0.17 0.05 -0.1 0.0 -0.07 -0.21 0.48 -0.09 -0.16 -0.13 0.39 0.22 0.16 0.13 0.69 nan 1.23 1.22 2.36 2.38 0.01 0.94 0.17 1.39 0.7 0.07 0.13 2.65 0.18 0.19 0.2 -0.2 -0.73 0.11 0.09 0.12 0.01 0.98 0.37 -0.03 0.69 0.95 0.28 0.04 0.18 0.28 0.75 0…	0.13432835820895522 -0.05970149253731343 0.022388059701492536 -0.08208955223880597 0.11194029850746268 nan 0.47014925373134325 -0.3582089552238806 0.14925373134328357 -0.2537313432835821 -0.022388059701492536 0.13432835820895522 -0.8283582089552239 -0.007462686567164179 0.42537313432835816 1.708955223880597 1.1194029850746268 -0.0 -0.2462686567164179 0.626865671641791 0.022388059701492536 0.09701…	[0.2840343713760376, 0.04039809852838516, 0.04892913997173309, 0.07466991245746613, 0.3825715184211731, 0.6552934050559998, 0.5299149751663208, 0.06542014330625534, 0.006228834390640259, 0.06499442458152771, 0.08201408386230469, 0.17331020534038544, 0.6502679586410522, 0.06733936071395874, 0.06065402179956436, 0.04302266240119934, 0.033258404582738876, 0.03474252671003342, 0.04434124752879143, 0.…	[0.11571131646633148, 0.06087812781333923, 0.2604411840438843, 0.1413920521736145, 0.19792743027210236, 0.3624972403049469, 0.21101319789886475, 0.20993289351463318, 0.12597239017486572, 0.12975281476974487, 0.04210306704044342, 0.15713787078857422, 0.8130685091018677, 0.14641216397285461, 0.13244065642356873, 0.136930450797081, 0.19130992889404297, 0.08354736119508743, 0.04851406812667847, 0.106…	0
2314096	2314169	+	74	Y	CUGGAACAUCUGAUUCGUGAGAAGGAUGUUCCAGGAAUAGAAAAAUACAUCAGCGACAUUGACAGUUAUGUCAA	-0.84 0.06 -0.04 -0.04 0.03 -0.11 0.1 0.07 0.51 -0.07 0.07 4.66 3.31 -0.18 1.12 0.07 0.04 1.42 0.0 0.44 -0.04 0.04 0.26 0.03 0.0 0.36 -0.64 0.39 0.04 0.29 -0.35 -0.07 0.04 0.37 nan 0.12 0.73 1.58 1.82 6.47 -0.06 1.34 1.1 -0.22 0.08 3.73 0.05 0.74 -0.07 -0.11 0.06 0.19 -0.26 -0.11 0.7 -0.09 0.83 1.88 -0.2 0.14 0.05 0.02 0.26 0.0 -0.03 2.6 0.1 0.67 -0.91 0.03 0.0 0.02 0.12 -0.11	-0.626865671641791 0.04477611940298507 -0.029850746268656716 -0.029850746268656716 0.022388059701492536 -0.08208955223880597 0.07462686567164178 0.05223880597014926 0.3805970149253731 -0.05223880597014926 0.05223880597014926 3.4776119402985075 2.470149253731343 -0.13432835820895522 0.8358208955223881 0.05223880597014926 0.029850746268656716 1.0597014925373134 0.0 0.3283582089552239 -0.02985074626…	[0.021577879786491394, 0.0046704597771167755, 0.00046367570757865906, 0.0036638081073760986, 0.0021370500326156616, 0.008710511028766632, 0.005767159163951874, 0.005606427788734436, 0.0017660222947597504, 0.03074004128575325, 0.5024071931838989, 0.6552199125289917, 0.6099682450294495, 0.6668298840522766, 0.5909034013748169, 0.35109567642211914, 0.6092453002929688, 0.9925618767738342, 0.8246239423…	[0.060952916741371155, 0.013675600290298462, 0.05413811653852463, 0.04603530466556549, 0.09287244826555252, 0.08173148334026337, 0.06128183752298355, 0.05420459061861038, 0.022528916597366333, 0.038998231291770935, 0.2295430302619934, 0.10975386947393417, 0.7883140444755554, 0.1883930116891861, 0.101446732878685, 0.4985130727291107, 0.24523702263832092, 0.4277080297470093, 0.23586012423038483, 1.…	0
2412700	2412760	+	61	Y	CACCGCCAGCUCAGCUGGCGGUGCUGUUUUGUAACCCGCCAAAUCGGCGGUAACGAAAGAG	0.01 0.08 -0.04 -0.08 -0.46 0.12 -0.01 0.03 0.13 0.15 2.17 nan 0.44 0.47 0.2 0.11 0.24 0.03 -0.02 0.03 0.09 0.03 0.23 nan 0.36 -0.63 -0.12 0.08 0.35 0.19 0.4 0.21 -0.1 0.29 0.3 -0.08 0.04 -0.94 0.01 0.01 0.34 0.4 0.85 1.15 0.04 0.09 0.04 0.12 0.21 0.15 -0.19 0.21 0.0 0.06 0.46 0.04 0.06 0.41 2.58 0.77 0.62	0.007462686567164179 0.05970149253731343 -0.029850746268656716 -0.05970149253731343 -0.34328358208955223 0.08955223880597014 -0.007462686567164179 0.022388059701492536 0.09701492537313433 0.11194029850746268 1.6194029850746268 nan 0.3283582089552239 0.3507462686567164 0.14925373134328357 0.08208955223880597 0.1791044776119403 0.022388059701492536 -0.014925373134328358 0.022388059701492536 0.06716…	[0.00399240106344223, 0.003942918032407761, 0.009070519357919693, 0.03899985924363136, 0.04235411062836647, 0.03216167539358139, 0.04045575112104416, 0.045748837292194366, 0.05878623574972153, 0.6519451141357422, 0.5618568658828735, 0.6627088189125061, 0.9114174842834473, 0.2626228928565979, 0.16480447351932526, 0.14210382103919983, 0.040423765778541565, 0.026629183441400528, 0.10900753736495972,…	[0.025578275322914124, 0.01674307882785797, 0.013882622122764587, 0.04023808240890503, 0.11015092581510544, 0.04013890027999878, 0.06152365356683731, 0.09123963862657547, 0.1390276998281479, 0.7297130823135376, 0.4297526180744171, 0.9910203218460083, 0.932456374168396, 0.2537755072116852, 0.08901893347501755, 0.03521208465099335, 0.05578659474849701, 0.11790448427200317, 0.04301503300666809, 0.08…	0
2817350	2817398	-	49	Y	AGCGUCAGGCAAUGCCGUGGACUCGCUUCACGGCAUUCGCAUUAACGCU	0.36 -0.11 0.98 0.04 1.09 0.49 0.05 0.32 -0.03 -0.25 0.06 0.16 0.16 -0.28 0.12 -0.07 0.05 -0.21 -0.15 0.66 0.05 nan -0.19 0.28 nan 0.33 0.27 0.19 0.02 0.03 -0.72 -0.49 -0.93 0.29 0.04 0.04 -0.33 nan 0.47 0.0 0.99 0.17 0.19 0.75 0.01 0.01 0.04 0.02 0.24	0.1791044776119403 0.014925373134328358 0.029850746268656716 0.007462686567164179 0.007462686567164179 0.5597014925373134 0.1417910447761194 0.12686567164179105 0.7388059701492536 0.0 0.3507462686567164 nan -0.2462686567164179 0.029850746268656716 0.029850746268656716 0.21641791044776115 -0.6940298507462687 -0.3656716417910447 -0.5373134328358209 0.022388059701492536 0.014925373134328358 0.141791…	[0.14027313888072968, 0.07673174142837524, 0.0643545463681221, 0.10182339698076248, 0.21906256675720215, 0.3347930312156677, 0.20306013524532318, 0.2825893759727478, 0.14304305613040924, 0.054511819034814835, 0.015691086649894714, 0.05206696689128876, 0.01598655804991722, 0.004436790943145752, 0.0043044425547122955, 0.0027734488248825073, 0.0046552009880542755, 0.013208512216806412, 0.01123302429…	[0.23228779435157776, 0.07137507945299149, 0.03940656781196594, 0.05637000501155853, 0.06003965437412262, 1.0000264644622803, 0.7155438661575317, 0.1385737806558609, 0.11860015988349915, 0.09570050239562988, 0.15218576788902283, 0.037341341376304626, 0.017802074551582336, 0.04636296629905701, 0.02523227035999298, 0.0279502272605896, 0.08140766620635986, 0.01523880660533905, 0.024558603763580322, …	0
3071723	3071805	-	83	Y	GUCGCAGUUUGCGACAGGUAAGGUUUCCCCGGACGAUUUGCUGGAUUACUCUGUCUGGCAAAUUUGCUCAGGGAAAACCUUGC	0.39 0.15 -0.05 0.53 nan 1.5 3.2 0.71 0.85 0.89 0.0 0.07 0.27 -0.05 0.21 nan 0.19 1.35 0.65 0.32 0.09 -1.03 -0.06 0.14 0.06 0.31 0.84 0.05 -0.26 0.01 0.04 0.24 0.13 -0.08 0.08 -0.18 0.12 0.14 0.04 0.26 0.02 0.02 -0.11 0.16 0.28 0.47 0.2 2.02 0.64 0.1 0.83 0.34 0.08 -0.04 0.07 0.1 0.09 -0.28 -0.08 -0.06 -0.01 0.08 2.18 0.08 3.03 0.1 0.41 0.69 0.11 0.05 0.44 0.37 nan 0.03 0.05 -0.0 -0.05 0.08 0.58 …	-0.10447761194029852 nan 0.23134328358208953 -0.04477611940298507 0.4328358208955223 0.05970149253731343 -0.03731343283582089 -0.0 0.03731343283582089 0.022388059701492536 nan 0.2761194029850746 0.3283582089552239 0.03731343283582089 0.08208955223880597 0.5149253731343283 0.3059701492537313 0.07462686567164178 2.261194029850746 0.05970149253731343 1.626865671641791 0.05970149253731343 -0.00746268…	[0.08338140696287155, 0.09179918467998505, 0.07146073877811432, 0.033789560198783875, 0.09923222661018372, 0.26498159766197205, 0.5898551940917969, 0.9864235520362854, 0.9988383650779724, 0.828917384147644, 0.23471574485301971, 0.10478893667459488, 0.08885543048381805, 0.10052262246608734, 0.12198419868946075, 0.4270601272583008, 0.4010695815086365, 0.32963037490844727, 0.24715252220630646, 0.067…	[0.08805722743272781, 0.023041129112243652, 0.06759682297706604, 0.2111445516347885, 0.11178108304738998, 0.6703097224235535, 0.34878528118133545, 0.3357957899570465, 0.3432053327560425, 0.27420392632484436, 0.21548521518707275, 0.10483686625957489, 0.07592408359050751, 0.19056054949760437, 0.14699088037014008, 0.7960695028305054, 0.16470679640769958, 0.1672690063714981, 0.0786176323890686, 0.127…	0
3209004	3209053	+	50	Y	ACUCGUCUGUACUAAUUCCCCGAGAGCGUUGCUCUCCGAUCAGACCGAGU	-0.1 0.09 0.1 -0.02 0.23 nan 0.02 0.11 0.42 0.06 1.37 0.29 1.34 0.46 6.17 0.66 4.08 0.43 0.31 0.25 -0.2 -0.03 0.06 0.05 0.08 -0.04 0.41 3.1 0.13 0.88 0.1 -0.06 -0.04 0.1 -0.03 0.08 nan 0.45 1.02 0.6 0.1 0.04 0.04 -0.05 0.02 0.16 0.6 0.2 0.04 0.33	-0.07462686567164178 0.06716417910447761 0.07462686567164178 -0.014925373134328358 0.17164179104477612 nan 0.014925373134328358 0.08208955223880597 0.3134328358208955 0.04477611940298507 1.0223880597014925 0.21641791044776115 1.0 0.34328358208955223 4.604477611940299 0.4925373134328358 3.044776119402985 0.3208955223880597 0.23134328358208953 0.18656716417910446 -0.14925373134328357 -0.02238805970…	[0.10201022028923035, 0.012574724853038788, 0.011293627321720123, 0.018229849636554718, 0.07853872328996658, 0.012787993997335434, 0.041147902607917786, 0.021274112164974213, 0.08821938931941986, 0.5605430603027344, 0.3517219126224518, 0.4037022590637207, 0.9412637948989868, 0.7224349975585938, 0.918085515499115, 0.9912125468254089, 0.9552276134490967, 0.16329210996627808, 0.08301389962434769, 0.…	[0.20246338844299316, 0.059326767921447754, 0.020685672760009766, 0.11510927975177765, 0.0873393788933754, 0.0936385840177536, 0.046688199043273926, 0.04214787483215332, 0.051205843687057495, 0.24545139074325562, 0.8220731019973755, 0.9841326475143433, 0.3334875702857971, 0.8388018608093262, 0.9327666759490967, 0.3566868305206299, 0.30217111110687256, 0.6056525707244873, 0.41170746088027954, 0.30…	0
3210969	3211034	+	66	Y	GUUGGCGGUAAACAACCGUUGGAUUUCAGCGUUAACGGCUGAAGGACAUCGGGUCAAUCGCCCAAC	0.5 0.0 0.46 -0.14 0.53 -0.03 -0.39 0.27 0.6 0.12 0.11 -0.54 0.68 -0.04 0.22 0.04 -0.03 0.02 -0.72 -0.03 0.01 0.04 0.2 0.57 -0.03 0.0 0.04 0.0 nan -0.37 3.81 0.03 1.64 0.22 0.47 0.91 1.61 0.49 0.23 0.11 -0.32 -0.09 0.25 -0.36 nan 0.3 0.12 0.19 nan 0.48 -0.03 -0.23 nan 0.8 0.97 0.47 0.4 0.33 0.0 0.13 -0.05 0.35 -0.45 -0.05 -0.03 0.75	0.3731343283582089 0.0 0.34328358208955223 -0.10447761194029852 0.39552238805970147 -0.022388059701492536 -0.291044776119403 0.20149253731343283 0.4477611940298507 0.08955223880597014 0.08208955223880597 -0.40298507462686567 0.5074626865671642 -0.029850746268656716 0.16417910447761194 0.029850746268656716 -0.022388059701492536 0.014925373134328358 -0.5373134328358209 -0.022388059701492536 0.00746…	[0.1565379500389099, 0.2335028350353241, 0.34989774227142334, 0.17404672503471375, 0.014058459550142288, 0.17430150508880615, 0.0432531014084816, 0.20450332760810852, 0.7142751216888428, 0.8806302547454834, 0.9649156332015991, 0.5375730395317078, 0.4860604405403137, 0.6203314065933228, 0.5173354148864746, 0.1611553132534027, 0.044813986867666245, 0.07309093326330185, 0.10423490405082703, 0.150469…	[0.159156933426857, 0.07581663131713867, 0.051766082644462585, 0.06614263355731964, 0.10986021161079407, 0.1645093709230423, 0.05955991894006729, 0.049215853214263916, 0.07869882136583328, 0.4702295660972595, 0.8250646591186523, 0.9949625730514526, 1.004390835762024, 0.9544811248779297, 0.9725366234779358, 0.12504026293754578, 0.057845160365104675, 0.06337153166532516, 0.07870760560035706, 0.0237…	0
3306007	3306062	-	56	Y	GCUGACGUACACAUCAGCCCGUAAUCUUUUUUGAUUGCCAUCACCUUAACGGGUGA	1.74 0.52 0.37 -0.06 0.05 0.26 0.3 -0.16 0.04 0.25 0.06 0.09 0.27 0.33 0.16 -0.04 -0.18 -0.12 0.42 0.1 0.66 0.01 0.05 0.14 0.6 0.07 -0.59 2.18 1.69 0.24 0.52 0.77 0.84 -0.17 -0.18 0.29 0.27 0.23 0.2 nan 0.43 0.01 -0.07 -0.11 0.07 0.62 0.2 0.24 0.19 nan 0.02 0.0 -0.06 -0.02 0.01 0.93	0.6940298507462687 0.007462686567164179 -0.014925373134328358 -0.04477611940298507 0.0 0.014925373134328358 nan 0.1417910447761194 0.1791044776119403 0.14925373134328357 0.46268656716417905 0.05223880597014926 -0.08208955223880597 -0.05223880597014926 0.007462686567164179 0.3208955223880597 nan 0.14925373134328357 0.17164179104477612 0.20149253731343283 0.21641791044776115 -0.13432835820895522 -0…	[0.05506834760308266, 0.08699949085712433, 0.09302227944135666, 0.10786037147045135, 0.12887853384017944, 0.2820762097835541, 0.6612738966941833, 0.9915698170661926, 0.5185179710388184, 0.48896878957748413, 0.11210270971059799, 0.32962095737457275, 0.6040228605270386, 0.5282649397850037, 0.09423671662807465, 0.10522311180830002, 0.14113479852676392, 0.06861618906259537, 0.17602995038032532, 0.171…	[0.1543760895729065, 0.11591969430446625, 0.057297781109809875, 0.08478893339633942, 0.1807631403207779, 0.5827149748802185, 0.20677390694618225, 0.2653723955154419, 0.7771434783935547, 1.0021653175354004, 0.763869047164917, 0.6097196340560913, 0.6566439867019653, 0.07369419932365417, 0.12666568160057068, 0.21129095554351807, 0.1369023621082306, 0.11548435688018799, 0.33484211564064026, 0.7475665…	0
3344489	3344587	+	99	Y	GGGCAAUUAGCAUGUGCAUGGCGGUCUGUUGUGCGGCACAACGGGCCAUUUGUACGGUUAAUGCUCCGAGCCUGUUCCACUGUUUGAGUGGGCAGGUUC	-0.11 -0.17 nan 0.56 0.03 -0.22 -0.05 -0.52 -0.01 0.14 nan 2.12 0.49 1.48 nan 0.12 0.08 -0.86 -0.02 1.23 1.8 0.08 0.17 -0.25 0.66 0.5 0.42 0.01 0.07 0.1 0.25 1.6 0.76 1.61 nan nan 0.41 0.1 -0.03 0.03 0.03 0.01 nan 0.82 nan -0.26 0.02 1.06 0.54 -0.18 0.08 -0.05 0.47 0.13 0.1 0.84 -0.08 0.19 0.09 0.63 0.77 0.41 nan 0.01 -0.82 0.01 0.43 0.27 0.03 -0.18 0.3 -0.06 0.27 -0.03 0.08 nan 0.79 -0.23 -0.28 …	-0.08208955223880597 -0.12686567164179105 nan 0.41791044776119407 0.022388059701492536 -0.16417910447761194 -0.03731343283582089 -0.3880597014925373 -0.007462686567164179 0.10447761194029852 nan 1.5820895522388059 0.3656716417910447 1.1044776119402984 nan 0.08955223880597014 0.05970149253731343 -0.6417910447761194 -0.014925373134328358 0.917910447761194 1.3432835820895521 0.05970149253731343 0.12…	[0.08385074138641357, 0.07400137931108475, 0.027559131383895874, 0.13615138828754425, 0.29531553387641907, 0.8201894164085388, 0.17971524596214294, 0.05620972812175751, 0.15606877207756042, 0.14240266382694244, 0.5275700092315674, 0.861578643321991, 0.5822364687919617, 0.07991805672645569, 0.07165305316448212, 0.09063903242349625, 0.0659206435084343, 0.07640988379716873, 0.2860555946826935, 0.422…	[0.07699757069349289, 0.04232308268547058, 0.11361803114414215, 0.1918959617614746, 0.5761090517044067, 0.9907270669937134, 0.06309598684310913, 0.030208945274353027, 0.1588970124721527, 0.13663528859615326, 0.17058002948760986, 0.9051875472068787, 0.1882685124874115, 0.1969224065542221, 0.03440147638320923, 0.23324213922023773, 0.09075970947742462, 0.15859359502792358, 0.1546574831008911, 0.1905…	0
3403251	3403340	+	90	Y	GGUAUAUUUUGUUUUUUGCCGGAGGAUAGCAGCAGAUCGCUGCACAAUGUCCGUCAAGUCUAACAUUGACACUCUGGGGCAAAAUAGACC	0.37 -0.06 0.04 0.93 0.07 0.0 -0.04 0.34 0.07 -0.12 1.09 -0.89 0.03 0.91 0.21 1.57 0.8 1.79 0.43 -0.07 0.0 -0.2 0.38 0.13 -0.79 0.16 1.02 1.44 0.02 0.0 -0.02 -0.34 -0.02 nan 0.11 0.37 1.32 1.3 0.52 0.14 0.25 0.02 0.08 -1.6 0.47 0.32 0.4 0.15 1.08 0.97 0.04 1.76 0.06 nan 0.21 0.41 0.78 0.58 -0.37 0.91 0.3 0.22 0.89 0.35 2.9 0.5 0.02 1.13 nan 0.41 0.8 0.25 nan 1.21 -0.15 -0.09 0.34 0.12 -0.14 0.77 …	0.2761194029850746 -0.04477611940298507 0.029850746268656716 0.6940298507462687 0.05223880597014926 0.0 -0.029850746268656716 0.2537313432835821 0.05223880597014926 -0.08955223880597014 0.8134328358208955 -0.6641791044776119 0.022388059701492536 0.6791044776119403 0.15671641791044774 1.171641791044776 0.5970149253731343 1.335820895522388 0.3208955223880597 -0.05223880597014926 0.0 -0.149253731343…	[0.0030150599777698517, 0.09608818590641022, 0.08697494864463806, 0.11589264124631882, 0.006352677941322327, 0.17527636885643005, 0.1734619140625, 0.06279246509075165, 0.02282451093196869, 0.020429182797670364, 0.2791529893875122, 0.2379084974527359, 0.21315883100032806, 0.08884638547897339, 0.15592685341835022, 0.5284733176231384, 0.7593863010406494, 0.5959649682044983, 0.17060759663581848, 0.09…	[0.07216256111860275, 0.06163769215345383, 0.06533460319042206, 0.3861742913722992, 0.11143174767494202, 0.1446598768234253, 0.07966046035289764, 0.09958058595657349, 0.13533180952072144, 0.13044287264347076, 0.1130405142903328, 0.2787235677242279, 0.1984541416168213, 0.29617536067962646, 0.26904594898223877, 0.1839628964662552, 0.25853049755096436, 0.23619520664215088, 0.22849681973457336, 0.114…	0
3543508	3543598	+	91	Y	CCGUCGCAGAGAUUGCGCAGUUGCUUUUACGCAAUGGUGCGGCGGCUGUCCAGGUCUGGUGCCUUUGUCGAACCUUGUAGAGCCUCGAUGA	0.04 -0.05 -0.1 2.47 0.14 -0.05 0.0 0.28 0.47 -0.17 0.75 0.68 -0.53 -0.19 0.07 -0.66 0.7 -0.08 0.49 3.27 0.18 1.08 0.4 0.01 1.16 -0.2 1.89 0.31 1.1 -0.03 -0.51 -0.35 -0.26 0.88 -0.03 1.5 0.85 0.02 0.19 -0.08 -0.11 nan 1.31 -0.04 -0.37 nan 1.43 -0.83 0.13 -0.03 -0.02 1.37 -0.18 2.34 0.17 0.84 0.62 0.05 0.8 0.1 1.54 -0.07 0.14 -0.77 nan -0.01 0.74 -0.57 -0.57 -0.22 nan 1.56 0.59 -0.07 0.57 1.97 0.5…	0.029850746268656716 -0.03731343283582089 -0.07462686567164178 1.8432835820895523 0.10447761194029852 -0.03731343283582089 0.0 0.20895522388059704 0.3507462686567164 -0.12686567164179105 0.5597014925373134 0.5074626865671642 -0.39552238805970147 -0.1417910447761194 0.05223880597014926 -0.4925373134328358 0.5223880597014925 -0.05970149253731343 0.3656716417910447 2.4402985074626864 0.1343283582089…	[0.004083547741174698, 0.005363479256629944, 0.04203188046813011, 0.05870111286640167, 0.034674279391765594, 0.0012426786124706268, 0.03294054791331291, 0.18386442959308624, 0.09761026501655579, 0.19203975796699524, 0.086682990193367, 0.4818113148212433, 0.09622103720903397, 0.17839205265045166, 0.019319307059049606, 0.09562376886606216, 0.024628661572933197, 0.41893598437309265, 0.64232575893402…	[0.09209494292736053, 0.07807528227567673, 0.139884814620018, 0.05077432096004486, 0.12514163553714752, 0.18106317520141602, 0.10344024002552032, 0.34009045362472534, 0.09697170555591583, 0.9506826400756836, 0.0845770388841629, 0.4142892360687256, 0.035972461104393005, 0.03783552348613739, 0.06630325317382812, 0.13470621407032013, 0.18060126900672913, 0.8116217255592346, 0.7619478702545166, 0.268…	0
3598830	3598864	-	35	Y	UCUGGCACAGUUGUUGCUACCACUGAAGCGCCAGA	-0.09 0.06 -0.16 0.12 0.31 0.16 0.21 0.05 0.02 0.05 0.63 nan 0.36 0.24 nan 0.57 0.07 nan 0.49 0.09 nan 0.13 0.06 0.89 1.35 -0.76 0.83 1.45 0.32 -0.25 -0.04 0.01 -0.01 0.38 0.16	0.11940298507462686 0.2835820895522388 -0.007462686567164179 0.007462686567164179 -0.029850746268656716 -0.18656716417910446 0.23880597014925373 1.0820895522388059 0.6194029850746268 -0.5671641791044776 1.007462686567164 0.6641791044776119 0.04477611940298507 0.09701492537313433 nan 0.06716417910447761 0.3656716417910447 nan 0.05223880597014926 0.42537313432835816 nan 0.1791044776119403 0.2686567…	[0.05871889740228653, 0.07804189622402191, 0.07450471818447113, 0.03369734808802605, 0.02109508216381073, 0.2223881632089615, 0.07829732447862625, 0.05915641784667969, 0.28344064950942993, 0.1378173828125, 0.2868995666503906, 0.3033328950405121, 0.34861820936203003, 0.8672335743904114, 0.8607165813446045, 0.9090466499328613, 0.7956631779670715, 0.9111658334732056, 0.6197839379310608, 0.0612359941…	[0.04145132005214691, 0.07530377805233002, 0.04864048957824707, 0.055916279554367065, 0.0979539230465889, 0.14226125180721283, 1.0019932985305786, 0.15776261687278748, 0.22010135650634766, 0.08642520755529404, 0.05188969522714615, 0.13032963871955872, 0.10960069298744202, 0.24362701177597046, 0.39571046829223633, 0.3223029375076294, 1.0009286403656006, 0.44815653562545776, 0.8738065958023071, 0.5…	0
3809744	3809817	-	74	Y	UGGCAUUUGGGCCUGGCAAUCGAGAGUUCACAUAGAACUGCGAUGACCGGGCUGUAAAGCCUGACGAGGCGCCA	0.27 0.05 -0.76 0.06 0.14 0.33 1.33 1.53 0.95 -0.02 -0.27 -0.04 -0.19 -0.49 -0.04 0.03 -0.44 0.21 0.72 0.27 0.27 0.27 0.06 -0.5 -0.15 nan -0.3 -0.0 0.37 0.44 0.08 0.24 0.53 0.62 0.14 -0.09 0.01 0.06 0.14 0.5 -0.04 -0.13 -0.04 0.07 0.63 0.74 -0.03 -0.12 0.38 0.1 -0.12 -0.09 0.12 nan 0.14 0.54 nan 0.34 0.01 -0.12 -0.2 0.16 0.13 0.08 1.32 0.47 0.75 0.11 -0.03 0.37 -0.46 0.04 -0.15 0.45	0.33582089552238803 -0.11194029850746268 0.029850746268656716 -0.34328358208955223 0.2761194029850746 -0.022388059701492536 0.08208955223880597 0.5597014925373134 0.3507462686567164 0.9850746268656716 0.05970149253731343 0.09701492537313433 0.11940298507462686 -0.14925373134328357 -0.08955223880597014 0.007462686567164179 0.2537313432835821 nan 0.40298507462686567 0.10447761194029852 nan 0.089552…	[0.3538016080856323, 0.06150878220796585, 0.019040677696466446, 0.15259617567062378, 0.35743647813796997, 0.24676479399204254, 0.22287222743034363, 0.46799057722091675, 0.26027822494506836, 0.027892641723155975, 0.018493931740522385, 0.006136171519756317, 0.007445432245731354, 0.027867518365383148, 0.019616879522800446, 0.018673960119485855, 0.1382446587085724, 0.25577035546302795, 0.353128492832…	[0.10878024250268936, 0.061884939670562744, 0.13029524683952332, 0.19998204708099365, 0.8100425601005554, 0.10826000571250916, 0.08567023277282715, 0.10081741213798523, 0.15698765218257904, 0.06693405658006668, 0.07310907542705536, 0.04329235851764679, 0.03838634490966797, 0.06990314275026321, 0.08121110498905182, 0.10634569823741913, 0.708072304725647, 0.8145884275436401, 0.22224880754947662, 0.…	0
3882234	3882326	+	93	Y	CCGGAGUGUACAAUUAUUACAAUCCGGCCUCUUUAAUCACCCAUGGCUUCGGUGUCCAUCGUUUCAUUUUUCGGCGGAUAUCCAAUAAAGCCA	-0.02 -0.09 0.17 0.1 0.03 nan -0.06 0.26 0.03 nan 1.66 0.32 0.52 0.38 4.57 0.92 0.08 0.03 0.18 0.02 0.04 2.97 0.05 0.21 0.01 0.4 0.31 0.74 0.02 0.21 -0.37 0.01 0.46 2.89 0.84 0.88 1.97 0.67 1.84 0.0 0.1 0.18 0.22 0.5 0.02 0.04 nan 0.4 1.14 3.94 0.24 0.32 -0.01 -0.1 -0.34 0.04 0.03 0.07 0.06 -0.0 0.94 0.0 1.05 1.0 0.61 3.07 -0.06 0.3 0.66 0.1 0.24 nan -0.0 0.22 0.11 0.19 -0.06 0.16 nan 0.39 -0.86 …	-0.014925373134328358 -0.06716417910447761 0.12686567164179105 0.07462686567164178 0.022388059701492536 nan -0.04477611940298507 0.19402985074626866 0.022388059701492536 nan 1.2388059701492535 0.23880597014925373 0.3880597014925373 0.2835820895522388 3.41044776119403 0.6865671641791045 0.05970149253731343 0.022388059701492536 0.13432835820895522 0.014925373134328358 0.029850746268656716 2.2164179…	[0.034481532871723175, 0.014816299080848694, 0.010855607688426971, 0.0018398948013782501, 0.1343381106853485, 0.08432424068450928, 0.10166822373867035, 0.007357239723205566, 0.08080855011940002, 0.23968729376792908, 0.44242143630981445, 0.6136968731880188, 0.8756893873214722, 0.9777065515518188, 0.977713942527771, 0.8461248278617859, 0.9725179076194763, 0.43652844429016113, 0.44681113958358765, 0…	[0.06965786218643188, 0.0541088730096817, 0.08708075433969498, 0.051693350076675415, 0.3001478314399719, 0.13710661232471466, 0.092969611287117, 0.07286423444747925, 0.037420228123664856, 0.17740517854690552, 1.0031594038009644, 0.9732058048248291, 0.8887954950332642, 0.3550333082675934, 0.4558483958244324, 0.9791431427001953, 0.39954471588134766, 0.06605894863605499, 0.17803922295570374, 0.10917…	0
4078282	4078313	-	32	Y	GUUUUCCGGGUGGCGCAGGUCGCCCGGAUUAC	0.32 0.06 0.51 0.09 -1.08 -0.53 0.31 0.23 0.39 0.47 0.28 0.03 -0.21 0.43 -0.31 1.09 1.09 0.22 0.37 -0.28 0.07 0.34 0.03 -0.04 -0.32 0.05 0.07 0.04 -0.6 0.11 0.19 0.09	0.06716417910447761 0.1417910447761194 0.08208955223880597 -0.4477611940298507 0.029850746268656716 0.05223880597014926 0.03731343283582089 -0.23880597014925373 -0.029850746268656716 0.022388059701492536 0.2537313432835821 0.05223880597014926 -0.20895522388059704 0.2761194029850746 0.16417910447761194 0.8134328358208955 0.8134328358208955 -0.23134328358208953 0.3208955223880597 -0.156716417910447…	[0.1404915452003479, 0.08033682405948639, 0.07642538845539093, 0.10980109870433807, 0.058844342827796936, 0.013535749167203903, 0.00847524031996727, 0.008427213877439499, 0.012605644762516022, 0.04609989747405052, 0.10812033712863922, 0.06788187474012375, 0.5108723044395447, 0.5715702772140503, 0.3210638761520386, 0.9852274656295776, 0.8801885843276978, 0.6413705945014954, 0.4445810317993164, 0.1…	[0.14403167366981506, 0.03419145941734314, 0.03108029067516327, 0.022049978375434875, 0.05650325119495392, 0.050747886300086975, 0.06063428521156311, 0.08135205507278442, 0.04655572772026062, 0.1860535442829132, 0.03297168016433716, 0.1655476689338684, 0.15829849243164062, 0.23619572818279266, 0.40792638063430786, 1.0037434101104736, 0.9951170086860657, 0.17058804631233215, 0.2068832516670227, 0.…	0
4106542	4106572	+	31	Y	UUCGGAAAAAGGCAGAUUCCUUUACCCUGAA	1.79 0.54 0.03 0.27 nan 0.92 0.53 -0.25 0.0 -0.06 0.59 nan 1.34 1.27 0.47 -0.36 0.0 1.99 0.06 0.2 0.26 -0.51 0.13 0.19 0.0 0.0 0.07 -0.27 -0.18 0.0 0.0	1.335820895522388 0.40298507462686567 0.022388059701492536 0.20149253731343283 nan 0.6865671641791045 0.39552238805970147 -0.18656716417910446 0.0 -0.04477611940298507 0.4402985074626865 nan 1.0 0.9477611940298507 0.3507462686567164 -0.26865671641791045 0.0 1.4850746268656716 0.04477611940298507 0.14925373134328357 0.19402985074626866 -0.3805970149253731 0.09701492537313433 0.1417910447761194 0.0…	[0.19774723052978516, 0.17836493253707886, 0.035960473120212555, 0.018332354724407196, 0.08602679520845413, 0.15067723393440247, 0.0946778953075409, 0.019741591066122055, 0.019694555550813675, 0.02714904025197029, 0.30519184470176697, 0.06267223507165909, 0.8126420974731445, 0.8353785276412964, 0.5890078544616699, 0.9910511374473572, 0.9915257692337036, 0.8687872886657715, 0.015689782798290253, 0…	[0.05002385377883911, 0.04248224198818207, 0.20792029798030853, 0.05525335669517517, 0.05962008237838745, 0.5452237129211426, 0.7074034810066223, 0.1883474737405777, 0.12494728714227676, 0.08652680367231369, 0.03316657245159149, 0.11464770138263702, 1.0037407875061035, 1.0020307302474976, 0.21280479431152344, 1.00059974193573, 0.5610374212265015, 0.2385258674621582, 0.03761988878250122, 0.0274572…	0
4157443	4157478	+	36	Y	AGCUACCCGAUAGGCUUCCGCCAUCGUCGGGUAGUU	0.99 nan 0.56 0.19 0.18 -0.49 0.15 0.13 0.06 0.0 0.21 1.82 -0.1 0.78 -1.45 1.03 2.13 0.56 3.29 -0.37 1.56 0.27 0.19 0.05 0.81 0.07 1.02 0.15 -0.1 0.07 0.07 0.33 0.0 0.64 0.7 -2.1	0.7388059701492536 nan 0.41791044776119407 0.1417910447761194 0.13432835820895522 -0.3656716417910447 0.11194029850746268 0.09701492537313433 0.04477611940298507 0.0 0.15671641791044774 1.3582089552238805 -0.07462686567164178 0.582089552238806 -1.0820895522388059 0.7686567164179104 1.58955223880597 0.41791044776119407 2.455223880597015 -0.2761194029850746 1.164179104477612 0.20149253731343283 0.1…	[0.04324427992105484, 0.031114384531974792, 0.011106397956609726, 0.01784878969192505, 0.02834765613079071, 0.0008402727544307709, 0.009179968386888504, 0.005062799900770187, 0.017264142632484436, 0.08498678356409073, 0.23650632798671722, 0.5384669303894043, 0.12461161613464355, 0.18649640679359436, 0.3336218595504761, 0.9943906664848328, 0.9946585297584534, 0.5682005882263184, 0.7103019952774048…	[0.18046751618385315, 0.05475550889968872, 0.07245423644781113, 0.025320619344711304, 0.0967307761311531, 0.053085505962371826, 0.045228078961372375, 0.06756456941366196, 0.07283775508403778, 0.1637522578239441, 0.1775120347738266, 0.857886791229248, 0.09868773818016052, 0.16885128617286682, 0.3346480131149292, 0.43237823247909546, 0.37567412853240967, 1.0046632289886475, 1.005799412727356, 0.241…	0
4198554	4198591	+	38	Y	CACUGAAAGACGCAGUUAAGUAAGAUUGCGUGGCAGUG	0.02 -0.18 -0.02 0.29 0.15 0.06 0.2 0.54 0.19 -0.02 -0.0 -0.01 -0.03 -0.12 0.46 0.44 0.32 1.48 0.03 0.73 0.13 -0.01 0.48 0.08 0.24 0.04 -0.04 -0.21 -0.07 0.4 0.75 0.44 0.41 0.03 0.05 0.13 0.52 -0.17	0.014925373134328358 -0.13432835820895522 -0.014925373134328358 0.21641791044776115 0.11194029850746268 0.04477611940298507 0.14925373134328357 0.40298507462686567 0.1417910447761194 -0.014925373134328358 -0.0 -0.007462686567164179 -0.022388059701492536 -0.08955223880597014 0.34328358208955223 0.3283582089552239 0.23880597014925373 1.1044776119402984 0.022388059701492536 0.544776119402985 0.09701…	[0.026967018842697144, 0.0003187991678714752, 0.0005570724606513977, 0.005047392100095749, 0.03912657871842384, 0.1008852869272232, 0.8786839842796326, 0.9611568450927734, 0.9978453516960144, 0.07897406816482544, 0.06335778534412384, 0.005097009241580963, 0.016058266162872314, 0.005196165293455124, 0.027681585401296616, 0.5368884801864624, 0.8612347841262817, 0.7954431176185608, 0.435861557722091…	[0.06882110238075256, 0.05567595362663269, 0.05024772882461548, 0.033687904477119446, 0.062387242913246155, 0.9998034238815308, 0.9843716025352478, 0.8782328963279724, 0.2719098925590515, 0.4756631553173065, 0.06112627685070038, 0.15039624273777008, 0.07109744846820831, 0.07052962481975555, 0.17814993858337402, 0.08413293212652206, 0.22858594357967377, 0.9991196393966675, 1.0046026706695557, 0.21…	0
4216709	4216816	+	108	Y	GCGCAGCAGCGUUUCGAACAGGCCGACUGGCAUGCUGUCCAGCAGGCGAUGAAAAACCGUAUCCAUCUUUACGAUCAUCACGUUGGUCUGGUCGUGGAGCAACUGCGC	0.57 -0.41 0.18 -0.05 0.15 0.38 0.2 0.26 -1.26 -0.12 1.94 0.0 2.41 0.99 0.07 0.27 -0.39 0.19 0.1 0.27 -0.05 0.17 -0.08 -0.01 0.03 0.68 0.13 -0.54 -0.44 nan -0.04 -0.21 0.46 nan 0.57 nan 1.65 1.25 0.09 0.15 0.16 -0.96 0.03 -0.0 nan 0.41 0.6 0.4 -0.02 1.08 1.96 -0.04 0.15 0.03 -0.53 -0.42 nan -0.05 0.94 -0.13 0.41 nan 0.04 0.15 0.28 0.02 nan 0.96 0.07 0.04 -0.02 -0.07 -0.1 0.53 0.88 0.14 0.33 0.14 …	0.42537313432835816 -0.3059701492537313 0.13432835820895522 -0.03731343283582089 0.11194029850746268 0.2835820895522388 0.14925373134328357 0.19402985074626866 -0.9402985074626865 -0.08955223880597014 1.4477611940298507 0.0 1.7985074626865671 0.7388059701492536 0.05223880597014926 0.20149253731343283 -0.291044776119403 0.1417910447761194 0.07462686567164178 0.20149253731343283 -0.0373134328358208…	[0.026976075023412704, 0.06973548233509064, 0.047474782913923264, 0.044090837240219116, 0.04321877658367157, 0.006583899259567261, 0.21452923119068146, 0.2563239336013794, 0.18619418144226074, 0.24572694301605225, 0.49109145998954773, 0.8525930047035217, 0.9643198251724243, 0.665938138961792, 0.09207779169082642, 0.03584153205156326, 0.15977701544761658, 0.12898854911327362, 0.048250962048769, 0.…	[0.11125040054321289, 0.11071820557117462, 0.16835680603981018, 0.08554160594940186, 0.16930177807807922, 0.15171507000923157, 1.0028572082519531, 1.0035955905914307, 0.10924961417913437, 0.4083484709262848, 0.20860052108764648, 0.26219838857650757, 0.1760464310646057, 0.08508853614330292, 0.17609372735023499, 0.08847800642251968, 0.2721799612045288, 0.41489773988723755, 0.22320982813835144, 0.19…	60.19
4397144	4397202	+	59	Y	GCAGUGGUCAAUGGCACAGGCCAUAACCCUGCUGGCGGACGUGGAACGGUUAUGUCCGC	nan 0.1 0.01 -0.32 0.92 -0.09 -0.12 0.51 0.55 0.03 0.12 -0.1 0.08 0.2 0.24 0.45 0.72 1.05 0.56 0.18 nan -0.27 -0.02 -0.15 0.22 0.1 0.06 -0.31 0.06 0.1 0.01 0.27 0.45 1.19 0.21 0.3 0.02 0.17 0.33 0.07 1.31 1.3 1.4 1.0 0.66 0.87 0.77 nan -0.28 0.44 1.07 1.5 0.35 0.24 nan -0.45 0.05 0.71 -0.03	nan 0.07462686567164178 0.007462686567164179 -0.23880597014925373 0.6865671641791045 -0.06716417910447761 -0.08955223880597014 0.3805970149253731 0.41044776119402987 0.022388059701492536 0.08955223880597014 -0.07462686567164178 0.05970149253731343 0.14925373134328357 0.1791044776119403 0.33582089552238803 0.5373134328358209 0.7835820895522388 0.41791044776119407 0.13432835820895522 nan -0.2014925…	[0.06403186917304993, 0.035068266093730927, 0.035114794969558716, 0.23445720970630646, 0.9070867300033569, 0.5990381240844727, 0.11207753419876099, 0.3315353989601135, 0.46026039123535156, 0.3209608197212219, 0.37887853384017944, 0.13964976370334625, 0.04715244472026825, 0.05703480541706085, 0.714529812335968, 0.4927715063095093, 0.8871968388557434, 0.9033728837966919, 0.795231819152832, 0.295760…	[0.1649869978427887, 0.07439042627811432, 0.17933642864227295, 0.13898633420467377, 0.5368244051933289, 0.25722938776016235, 0.06573378294706345, 0.07330802083015442, 0.9203010201454163, 0.7291262149810791, 0.29681652784347534, 0.06902387738227844, 0.04158531129360199, 0.09921491146087646, 0.21232354640960693, 1.002049207687378, 1.0044687986373901, 1.0010368824005127, 0.25420764088630676, 0.11476…	100
4404017	4404045	+	29	Y	CGCCUGGCAGAUAUUUUGCCUGCCGGGCG	-0.01 0.05 -0.03 -0.07 nan -0.08 -0.18 0.08 0.23 0.47 0.2 1.58 6.77 0.04 1.85 2.09 2.19 3.31 -1.69 -0.08 0.11 0.13 -0.89 -0.04 nan 0.07 -0.04 -0.02 -0.04	-0.007462686567164179 0.03731343283582089 -0.022388059701492536 -0.05223880597014926 nan -0.05970149253731343 -0.13432835820895522 0.05970149253731343 0.17164179104477612 0.3507462686567164 0.14925373134328357 1.1791044776119404 5.052238805970148 0.029850746268656716 1.380597014925373 1.5597014925373132 1.6343283582089552 2.470149253731343 -1.2611940298507462 -0.05970149253731343 0.08208955223880…	[0.11038317531347275, 0.042987704277038574, 0.023014940321445465, 0.04237113147974014, 0.04774985462427139, 0.051575254648923874, 0.025769993662834167, 0.02311292290687561, 0.009135335683822632, 0.05099671334028244, 0.18124575912952423, 0.5089778900146484, 0.9416940808296204, 0.8549889922142029, 0.6545884609222412, 0.27220964431762695, 0.4414932131767273, 0.2929908335208893, 0.05772233009338379, …	[0.1305845081806183, 0.29481634497642517, 0.0723990797996521, 0.06307778507471085, 0.051217854022979736, 0.08975722640752792, 0.13762181997299194, 0.062157079577445984, 0.1407470405101776, 0.07854660600423813, 0.9585283398628235, 0.3886995017528534, 0.8211433291435242, 0.3732735514640808, 0.3296522796154022, 0.5216405391693115, 0.246808260679245, 0.3347413241863251, 0.9223387241363525, 0.07590039…	0
192636	192773	+	138	Y	GUCUGGUUAUAAGGCGUUAUUGUUGCAGGCAGUUUGGUCACGGCCAGCGCGCAGCAACCGGAGCGUACAAAAGUACGUGAGGAUGGCGAGCACUGCCCGGGGCCAAAAUGGCAAAUAAAAUAGCCUAAUAAUCCAGAC	0.05 -0.52 0.22 -0.02 -0.07 -0.3 0.09 nan 0.24 -0.07 nan 0.52 0.09 0.11 0.16 1.65 -0.31 0.39 3.25 0.17 nan 3.44 0.13 0.67 0.59 0.16 0.32 1.98 nan 0.55 0.28 nan -0.33 0.08 1.19 -0.33 0.09 nan 0.04 0.51 0.02 -0.94 0.01 0.11 0.03 1.36 0.21 0.0 0.0 0.13 -0.39 0.05 3.23 -0.54 -0.02 -0.1 0.05 -0.01 -0.14 0.39 1.68 0.3 -0.2 -0.09 -0.1 -0.11 0.05 -0.06 0.42 3.07 0.14 1.23 0.43 0.2 -0.01 0.02 0.05 nan 0.0…	0.03731343283582089 -0.3880597014925373 0.16417910447761194 -0.014925373134328358 -0.05223880597014926 -0.22388059701492535 0.06716417910447761 nan 0.1791044776119403 -0.05223880597014926 nan 0.3880597014925373 0.06716417910447761 0.08208955223880597 0.11940298507462686 1.2313432835820894 -0.23134328358208953 0.291044776119403 2.425373134328358 0.12686567164179105 nan 2.5671641791044775 0.0970149…	[0.20737092196941376, 0.019488569349050522, 0.08306028693914413, 0.09265188872814178, 0.097707599401474, 0.12563340365886688, 0.2671612501144409, 0.15321055054664612, 0.3107460141181946, 0.15323549509048462, 0.5221068859100342, 0.2973465621471405, 0.11843761056661606, 0.008626848459243774, 0.3111576437950134, 0.38494813442230225, 0.5497299432754517, 0.7607773542404175, 0.8317598104476929, 0.59064…	[0.09548591822385788, 0.1135311871767044, 0.09708423912525177, 0.07519190013408661, 0.07861067354679108, 0.06500840187072754, 0.07563556730747223, 0.04758794605731964, 0.18535742163658142, 0.13075488805770874, 0.9980158805847168, 0.34191396832466125, 0.09706437587738037, 0.1298745572566986, 0.13669325411319733, 0.3523143529891968, 0.19563508033752441, 0.20607325434684753, 0.6566083431243896, 0.17…	0

## Sheet: HIV-1
Start	End	Length	Putative	Sequence	SHAPE in vitro From Study	Re-normalized SHAPE	RNet Predicted SHAPE	RNet Predicted DMS	Similarity
1	97	97	N	GGUCUCUCUGGUUAGACCAGAUCUGAGCCUGGGAGCUCUCUGGCUAACUAGGGAACCCACUGCUUAAGCCUCAAUAAAGCUUGCCUUGAGUGCUCAA	nan nan nan -0.137611 0.173722 0.104233 -0.512582 0.146099 -0.082495 -0.057997 nan -0.047436 nan 0.129467 0.158258 0.298001 -0.091491 0.025921 0.028321 0.001949 1.06816 0.155092 0.826075 0.353054 0.010625 0.025215 0.011467 0.019425 0.368303 0.515791 0.041974 0.19666 0.107946 2.41273 0.032547 2.6e-05 0.017993 -0.026789 0.086887 0.015742 0.116079 0.0205 0.083881 0.071771 0.059657 0.109893 0.027588 …	nan nan nan -0.11388000191991633 0.14376366492163928 0.08625803344295616 -0.42418730438783636 0.12090424748383381 -0.06826874856213164 -0.047995425302841975 nan -0.03925566830466424 nan 0.10714043360316985 0.13096642960113739 0.24661076841340435 -0.07571338959570866 0.02145092710441862 0.023437047433518758 0.0016128952172567376 0.8839559544715017 0.12834640586699947 0.6836184795255821 0.292169886…	[0.034870561212301254, 0.03343142941594124, 0.15322642028331757, 0.2602858543395996, 0.00616532564163208, 0.004864923655986786, 0.001977972686290741, 0.014128655195236206, 0.26143690943717957, 0.03332074359059334, 0.02189398556947708, 0.03325926139950752, 0.01672941818833351, 0.12593981623649597, 0.31018227338790894, 0.6748818159103394, 0.060185328125953674, 0.011809229850769043, 0.06847105175256…	[0.06676752865314484, 0.10491019487380981, 0.1024840772151947, 0.9594288468360901, 0.08094239234924316, 0.1031312495470047, 0.0799836590886116, 0.07037459313869476, 0.05386155843734741, 0.08897580951452255, 0.04961463809013367, 0.04766453802585602, 0.045784637331962585, 0.20858949422836304, 0.09732992202043533, 0.949726939201355, 0.05917223542928696, 0.050281986594200134, 0.15572574734687805, 0.0…	61.86
98	180	83	N	AGUAGUGUGUGCCCGUCUGUUGUGUGACUCUGGUAACUAGAGAUCCCUCAGACCCUUUUAGUCAGUGUGGAAAAUCUCUAGCA	0.153883 1.01245 0.200253 0.554339 0.061397 0.046496 0.148475 0.092344 0.466677 0.14179 0.227079 0.004138 0.065645 0.041759 0.178604 0.116923 0.297071 0.173559 0.509799 0.677201 0.152042 0.966289 0.135072 0.150538 0.277114 0.034943 0.351114 0.246704 0.053537 -0.006702 0.048144 0.061173 0.379177 0.309344 0.230837 0.345464 0.215935 0.051706 0.436434 0.047502 -0.08501 0.097338 0.400067 0.420839 0.01…	0.12734589775121524 0.8378531363322648 0.16571939760970417 0.4587433154637674 0.05080909576906717 0.03847777117576669 0.12287050660964295 0.07641928986267633 0.38619861534311056 0.11733833394296193 0.18791925758822098 0.0034244024674234892 0.05432452875157441 0.03455766617620529 0.14780376469108383 0.09675964468307313 0.245841146785878 0.14362877424928788 0.4218842323562173 0.5604177804112263 0.1…	[0.2096295803785324, 0.20758146047592163, 0.6295412182807922, 0.5690741539001465, 0.24353589117527008, 0.29387086629867554, 0.16979099810123444, 0.20344865322113037, 0.19567988812923431, 0.47323212027549744, 0.5605868101119995, 0.11060091853141785, 0.08064943552017212, 0.07779489457607269, 0.2361714243888855, 0.17875266075134277, 0.16934151947498322, 0.15444019436836243, 0.5747708082199097, 0.829…	[0.7596749067306519, 0.1480909138917923, 0.1674734205007553, 0.5334728956222534, 0.13627254962921143, 0.18262836337089539, 0.2023628056049347, 0.31027862429618835, 0.2115706503391266, 0.19961512088775635, 0.17906454205513, 0.31965160369873047, 0.2148756980895996, 0.5318273305892944, 0.09823901206254959, 0.13583946228027344, 0.29275789856910706, 0.1409357339143753, 0.09930214285850525, 0.268768966…	68.67
227	353	127	N	AUCUCUCGACGCAGGACUCGGCUUGCUGAAGCGCGCACGGCAAGAGGCGAGGGGCGGCGACUGGUGAGUACGCCAAAAAUUUUGACUAGCGGAGGCUAGAAGGAGAGAGAUGGGUGCGAGAGCGUCG	1.10982 0.106723 0.310102 0.070332 0.093201 -0.004056 0.162508 -0.011304 0.762364 0.035218 0.294161 0.122932 1.04045 1.09126 0.128486 2.28032 -0.127399 0.042248 0.006955 0.280489 0.542639 -0.033207 0.181574 0.18385 -0.031685 0.004973 0.042745 0.504147 1.02183 2.66336 -0.050684 0.046669 0.022971 0.004684 0.022358 -0.046614 0.413208 0.051246 0.042509 -0.017263 -0.05125 0.289622 0.566596 0.148541 0.…	0.9184316931841316 0.08831863328439754 0.25662495262275464 0.058203256244279564 0.07712850033019251 -0.003356543356179234 0.1344835176839189 -0.009354626750061653 0.6308944327392075 0.029144660729270282 0.24343297588684412 0.1017323934570576 0.8610245401717664 0.9030723626390904 0.10632860691865016 1.8870791286890118 -0.10542905991959524 0.03496233819325944 0.005755611203704777 0.2321187104120703…	[0.511637806892395, 0.17704704403877258, 0.09708425402641296, 0.0021332763135433197, 0.005179066210985184, 0.014697607606649399, 0.11577838659286499, 0.03630055487155914, 0.10905646532773972, 0.09482456743717194, 0.021338477730751038, 0.16303811967372894, 0.18756696581840515, 0.29806119203567505, 0.648903489112854, 0.2854485809803009, 0.07058849930763245, 0.01572544127702713, 0.029943149536848068…	[0.6562316417694092, 0.12694577872753143, 0.15032920241355896, 0.12871389091014862, 0.24662505090236664, 0.11053589731454849, 0.07130907475948334, 0.08913258463144302, 0.6764086484909058, 0.29790249466896057, 0.1131235733628273, 0.2579132318496704, 0.8784310221672058, 0.09804756194353104, 0.19277724623680115, 0.9352622628211975, 0.19566549360752106, 0.06812729686498642, 0.14513947069644928, 0.098…	59.06
1559	1719	161	N	UAGGAAAAAGGGCUGUUGGAAAUGUGGAAAGGAAGGACACCAAAUGAAAGAUUGUACUGAGAGACAGGCUAAUUUUUUAGGGAAGAUCUGGCCUUCCCACAAGGGAAGGCCAGGGAAUUUUCUUCAGAGCAGACCAGAGCCAACAGCCCCACCAGAAGAGA	0.70943 1.26011 0.069665 0.511575 0.692333 0.589047 0.185916 0.654954 0.286535 0.017714 -0.046173 -0.049555 0.012066 -0.074449 0.028619 -0.017117 0.149197 0.252611 0.103616 0.532231 0.433775 1.72475 0.19882 0.842989 0.314689 0.038085 0.32488 1.61905 0.258038 1.0626 0.747158 0.531304 0.285467 0.544791 0.260116 0.120318 0.425673 0.346502 0.183385 0.033453 0.116254 0.480855 1.12242 1.2969 1.07609 0.…	0.5870888937806297 1.0428042032926566 0.05765128030281715 0.4233539613997514 0.5729402690862025 0.48746592562310387 0.15385481129374223 0.5420072725106051 0.2371220785411284 0.014659223129033273 -0.03821047248147529 -0.04100924704523224 0.009985219954550947 -0.06161028015882342 0.023683657374382026 -0.014165175697169614 0.12346799780864724 0.20904826768929793 0.08574743500834998 0.440447837032206…	[0.7560433149337769, 0.6313744783401489, 0.1866857409477234, 0.4538409411907196, 0.24647848308086395, 0.2848323583602905, 0.13228468596935272, 0.31365540623664856, 0.24347224831581116, 0.06531046330928802, 0.003407008945941925, 0.004109807312488556, 0.0048260316252708435, 0.005073554813861847, 0.007821813225746155, 0.045366447418928146, 0.005414754152297974, 0.04989524930715561, 0.147767245769500…	[0.26251137256622314, 0.9535049796104431, 0.10998611152172089, 0.11705964803695679, 0.3373231887817383, 0.5499061942100525, 0.5600537061691284, 0.6321174502372742, 0.5416578650474548, 0.06015166640281677, 0.04911123216152191, 0.10100304335355759, 0.0777798593044281, 0.03599603474140167, 0.07234066724777222, 0.0395304411649704, 0.02382950484752655, 0.0490344762802124, 0.05244959890842438, 0.626087…	56.52
7294	7550	257	N	GCAGUGGGAAUAGGAGCUUUGUUCCUUGGGUUCUUGGGAGCAGCAGGAAGCACUAUGGGCUGCACGUCAAUGACGCUGACGGUACAGGCCAGACAAUUAUUGUCUGAUAUAGUGCAGCAGCAGAACAAUUUGCUGAGGGCUAUUGAGGCGCAACAGCAUCUGUUGCAACUCACAGUCUGGGGCAUCAAACAGCUCCAGGCAAGAAUCCUGGCUGUGGAAAGAUACCUAAAGGAUCAACAGCUCCUGGGGAUUUGGGG	0.019154 0.164672 0.005021 0.049855 0.343426 -0.003241 0.180296 0.224713 1.70742 1.57254 2.9147 0.195967 -0.01385 -0.022476 0.026099 0.067524 0.036856 0.075693 0.009391 0.01296 -0.027126 0.007354 0.103822 -0.044948 -0.22418 -0.18691 0.002721 -0.007994 -0.151576 0.181765 0.110747 0.16484 0.008866 -0.092131 0.696083 0.191812 1.23721 0.187498 1.42978 -0.093915 0.05808 -0.047736 -0.063314 -0.035905 0…	0.015850895326493357 0.1362743361806575 0.004155129238504915 0.04125751208636975 0.2842022333923101 -0.002682089994422312 0.1492039795230994 0.1859612739637831 1.412975655130066 1.3013556926346384 2.412060384678406 0.16217251772198618 -0.01146156939918205 -0.0186000168820228 0.021598231028826884 0.0558794954592324 0.030500187853881127 0.062639752529407 0.007771523337741417 0.010725049777140748 -0…	[0.29947274923324585, 0.5091439485549927, 0.370123028755188, 0.5575369596481323, 0.7680091857910156, 0.33813852071762085, 0.40720921754837036, 0.5682183504104614, 0.5960968732833862, 0.6189694404602051, 0.5100163817405701, 0.42553412914276123, 0.05400679633021355, 0.06148719787597656, 0.05743655934929848, 0.019560620188713074, 0.029069891199469566, 0.1729254573583603, 0.15654076635837555, 0.16246…	[0.16384342312812805, 0.7915100455284119, 0.6485060453414917, 0.15691497921943665, 0.31425347924232483, 0.12377209961414337, 0.13621635735034943, 0.10646382719278336, 0.8833134770393372, 0.9601061344146729, 0.25813543796539307, 0.3723944425582886, 0.09972880780696869, 0.06796230375766754, 0.33015361428260803, 0.13099196553230286, 0.24002580344676971, 0.08663241565227509, 0.09107990562915802, 0.09…	41.25
6097	6174	78	N	UUAUGGGAUCAAAGCCUAAAGCCAUGUGUAAAAUUAACCCCACUCUGUGUUAGUUUAAAGUGCACUGAUUUGAAGAAU	0.31332 0.996794 2.20042 0.373603 0.022401 -0.053684 0.058046 0.155722 0.190836 0.376608 0.083473 0.294036 1.6752 0.345213 -0.013993 0.11261 1.02534 0.467982 0.18748 0.357805 0.029997 0.008674 -0.002836 0.311414 0.030298 0.296255 -0.030328 0.178232 0.307536 0.208475 0.596147 0.608942 1.17718 0.279828 1.62312 1.04687 0.937559 0.053653 -0.06759 -0.090705 -0.421033 0.213515 0.085873 0.246041 0.10231…	0.2592880089640231 0.8248970113854348 1.8209578727327194 0.309175213880333 0.01853795062173842 -0.0444262015614216 0.0480359752595611 0.12886776245338824 0.15792635796839752 0.31166200204239375 0.06907809259623995 0.24332953211970348 1.3863119897118967 0.28568106548735256 -0.011579909068790934 0.09319042094165275 0.8485202575998066 0.3872785682720588 0.15514909970820584 0.29610157681403126 0.0248…	[0.8031442165374756, 0.27702510356903076, 0.481169730424881, 0.6042921543121338, 0.02472158893942833, 0.0035891160368919373, 0.07481595128774643, 0.25411257147789, 0.578398585319519, 0.566094696521759, 0.26758405566215515, 0.3112054467201233, 0.33195430040359497, 0.26650410890579224, 0.043902695178985596, 0.06932631880044937, 0.5439020991325378, 0.45046907663345337, 0.15096095204353333, 0.2833893…	[0.1691364347934723, 0.11502179503440857, 0.536756157875061, 0.18360036611557007, 0.09445920586585999, 0.03720308840274811, 0.07778891175985336, 0.5707146525382996, 0.15849867463111877, 0.8260190486907959, 0.6495674252510071, 0.758607029914856, 0.9631715416908264, 0.0852922797203064, 0.22371035814285278, 0.23143279552459717, 0.09052442014217377, 0.4757729172706604, 0.6786345839500427, 0.640406012…	0
6644	6756	113	N	AUUGUACAAGACCCAACAACAAUACAAGAAAAAGUAUCCGUAUCCAGAGGGGACCAGGGAGAGCAUUUGUUACAAUAGGAAAAAUAGGAAAUAUGAGACAAGCACAUUGUAAC	1.06375 0.175465 0.24767 1.00317 -0.030523 0.526185 0.405101 0.573496 1.68284 0.271553 0.817627 0.066041 0.043171 -0.126157 0.327102 0.741741 0.300719 0.404733 0.416212 0.165872 0.233255 1.01788 1.13272 0.61661 0.576691 0.380862 0.666005 1.66312 0.208824 3.20471 0.462925 0.358044 0.27693 0.473996 0.236276 0.682906 0.108211 0.074252 0.319439 0.536936 0.203564 1.15062 0.106347 -0.007005 0.02732 0.5…	0.8803064583667801 0.14520608481064826 0.20495934246176306 0.8301734710597442 -0.025259312835468138 0.43544446890314853 0.335241388099498 0.4745966934406721 1.3926344727595321 0.2247237223867208 0.6766273359671496 0.05465223860587594 0.03572616696982587 -0.10440124264928591 0.27069330495388066 0.6138278662612775 0.24886004968611025 0.33493684964903603 0.3444362976730946 0.13726739634520757 0.1930…	[0.5855350494384766, 0.16141526401042938, 0.6423736810684204, 0.18181440234184265, 0.28344810009002686, 0.14680615067481995, 0.08725858479738235, 0.3614247739315033, 0.24660199880599976, 0.36985811591148376, 0.4888707399368286, 0.04398063197731972, 0.17696599662303925, 0.06666074693202972, 0.14978784322738647, 0.24976587295532227, 0.13030695915222168, 0.1228969469666481, 0.0446040965616703, 0.099…	[0.4268835484981537, 0.06482716649770737, 0.12090909481048584, 0.145188108086586, 0.22720912098884583, 0.37202006578445435, 0.926284909248352, 0.3990222215652466, 0.4933929145336151, 0.08997166901826859, 0.8752452731132507, 0.3617036044597626, 0.18702083826065063, 0.30724966526031494, 0.5499500036239624, 0.7237491607666016, 1.0017602443695068, 0.6294571757316589, 0.625740647315979, 1.001745343208…	0
6921	7020	100	N	AACACAACUGUUUAAUAGUACUUGGUUUAAUAGUACUUGGAGUACUGAAGGGUCAAAUAACACUGAAGGAAGUGACACAAUCACACUCCCAUGCAGAAUA	0.054329 0.737945 0.240872 0.09636 0.062733 0.018503 0.817896 0.227734 -0.002558 0.470199 -0.010101 0.995462 0.946554 2.38758 2.00158 0.718249 0.638602 0.249471 0.077982 0.225666 0.058345 0.335549 0.252009 0.646149 0.841837 0.58632 0.366511 1.01832 1.4747 1.93958 0.955041 0.321438 -0.050684 -0.022845 0.057749 -0.002486 0.379909 0.521372 1.66217 0.707515 2.52359 0.098394 0.31917 0.367426 0.032763 …	0.044959971399867266 0.6106864859407507 0.1993336566295869 0.07974273121337057 0.05191470275226624 0.015312160187224942 0.6768499469540362 0.1884613029280379 -0.0021168732507658976 0.389113246926065 -0.008359083935100209 0.8237947146027842 0.7833208924962719 1.9758421563970452 1.6564078034667733 0.5943870584399357 0.5284751726683361 0.20644976025872527 0.06453401479328626 0.1867499292444633 0.048…	[0.6278754472732544, 0.43432968854904175, 0.24200193583965302, 0.10815878957509995, 0.28825294971466064, 0.4128098785877228, 0.6114809513092041, 0.29192906618118286, 0.30614614486694336, 0.642966091632843, 0.595698893070221, 0.49670130014419556, 0.4860753118991852, 0.7584934234619141, 0.7686026692390442, 0.5511739253997803, 0.16566431522369385, 0.16283011436462402, 0.09949740022420883, 0.05507287…	[0.2746145725250244, 0.3002215325832367, 0.5673617720603943, 0.4536808729171753, 1.0029747486114502, 0.7275996208190918, 0.5667941570281982, 0.7278393507003784, 0.16323807835578918, 0.10178502649068832, 0.0927705317735672, 0.09648570418357849, 0.12055900692939758, 0.6107608675956726, 0.554310142993927, 0.1748851090669632, 0.285876989364624, 0.0810113400220871, 0.08215968310832977, 0.2041181772947…	0
7149	7179	31	N	UGGGUCCGAGAUCUUCAGACCUGGAGGAGGC	0.449015 -0.077248 -0.020044 -0.007561 -0.09896 0.006057 0.367689 0.080004 1.1337 0.058123 1.65698 0.1482 -0.057026 0.920467 0.402906 0.160875 0.760812 0.220085 0.793422 -0.031479 -0.042421 0.061823 0.068022 0.09798 0.359861 0.212384 0.055254 0.489568 0.224139 0.02009 0.263838	0.3715824248212078 -0.06392659299263646 -0.016587414948534655 -0.0062571065868025615 -0.08189436156989573 0.005012471180566475 0.30428108236937534 0.06620732117055313 0.9381935904586779 0.04809969662011973 1.3712340262134781 0.12264293032193356 -0.04719187411969354 0.7617325920690906 0.3334249155485085 0.13313212830999366 0.6296100749263894 0.18213137192916834 0.6565964848980376 -0.02605045076655…	[0.6274138689041138, 0.11159075796604156, 0.005084086209535599, 0.019335977733135223, 0.08733832836151123, 0.05594246834516525, 0.09404732286930084, 0.44753390550613403, 0.2504253387451172, 0.13739408552646637, 0.9009653329849243, 0.9870803952217102, 0.6073223352432251, 0.557704746723175, 0.4447370767593384, 0.21767893433570862, 0.203068345785141, 0.06602281332015991, 0.10357028245925903, 0.02124…	[0.19188112020492554, 0.09582370519638062, 0.04720175266265869, 0.04835920035839081, 0.03318595886230469, 0.03977280855178833, 0.28244635462760925, 0.123016357421875, 0.4599238634109497, 0.18311850726604462, 0.9240318536758423, 0.2857621908187866, 0.7869668006896973, 0.20934776961803436, 0.06265175342559814, 0.1515982449054718, 0.416617751121521, 0.03268048167228699, 0.30301058292388916, 0.108606…	87.1
8622	9076	455	N	UGGAAGGGCUAAUUCACUCCCAAAGAAGACAAGAUAUCCUUGAUCUGUGGAUCUACCACACACAAGGCUACUUCCCUGAUUGGCAGAACUACACACCAGGGCCAGGGGUCAGAUAUCCACUGACCUUUGGAUGGUGCUACAAGCUAGUACCAGUUGAGCCAGAUAAGGUAGAAGAGGCCAAUAAAGGAGAGAACACCAGCUUGUUACACCCUGUGAGCCUGCAUGGAAUGGAUGACCCUGAGAGAGAAGUGUUAGAGUGGAGGUUUGACAGCCGCCUAGCAUUUCAUCACGUGGCCCGAGAGCUGCAUCCGGAGUACUUCAAGAACUGCUGACAUCGAGCUUGCUACAAGGGACUUUCCGCUGGGGACUUUCCAGGGAGGCGUGGCCUGGGCGGGACUG…	0.163177 0.091958 0.216435 0.731283 0.615392 -0.093504 -0.086715 -0.009699 -0.022061 0.411531 0.334534 1.15883 0.36133 0.101236 -0.10863 0.114981 -0.157132 0.101419 -0.026012 0.008314 0.035594 0.578274 3.52905 1.07002 3.08335 0.64261 0.409234 1.28568 0.632562 0.571255 0.056972 0.909502 0.139628 1.16998 0.798575 0.144467 0.220968 -0.099379 -0.260182 0.63504 0.020459 0.273749 1.07157 -0.007582 0.22…	0.13503714872565553 0.07609985550974606 0.17911081392866188 0.6051733469272236 0.5092677339856636 -0.0773792480217414 -0.07176101014079939 -0.008026408779975935 -0.0182565835751159 0.3405625354812121 0.27684365757299406 0.9589899254046307 0.2990186910473971 0.08377786568199236 -0.08989677139589503 0.09515254231677626 -0.13003460814673456 0.08392930735708623 -0.021526234166897 0.00688025184005773 …	[0.4991239011287689, 0.1244942843914032, 0.32210806012153625, 0.3871704041957855, 0.30835264921188354, 0.22062209248542786, 0.05750344693660736, 0.03679632022976875, 0.13249258697032928, 0.2792908549308777, 0.2940840721130371, 0.40996140241622925, 0.5909949541091919, 0.36302268505096436, 0.09739528596401215, 0.13886532187461853, 0.099546879529953, 0.1611773520708084, 0.019553128629922867, 0.01578…	[0.11730816960334778, 0.08126144856214523, 0.13465386629104614, 0.645102858543396, 0.5029397010803223, 0.09479210525751114, 0.04026550054550171, 0.1153317242860794, 0.3876749277114868, 0.1108875498175621, 0.7061357498168945, 0.7365130186080933, 0.2417600303888321, 0.1619376242160797, 0.3889978229999542, 0.43736696243286133, 0.3575070798397064, 0.12092528492212296, 0.13009528815746307, 0.128327623…	22.2
9077	9173	97	N	GUCUCUCUGGUUAGACCAGAUCUGAGCCUGGGAGCUCUCUGGCUAACUAGGGAACCCACUGCUUAAGCCUCAAUAAAGCUUGCCUUGAGUGCUUCAA	0.08662 0.157412 0.214066 -0.06727 -0.055279 0.070525 0.085584 0.097072 -0.041183 0.176971 -0.127063 -0.011546 0.088149 0.109607 0.907067 0.07952 0.014693 0.025395 -0.070664 0.401371 0.503048 1.21179 1.12171 0.031093 0.018728 0.040725 0.032989 0.36051 1.14297 0.236413 0.593089 0.250876 3.25479 0.139597 -0.050024 0.023583 -0.01603 0.087506 -0.033086 -0.029303 0.028112 0.006526 0.023836 -0.026276 0…	0.0716823928777725 0.1302663221851296 0.17715034765381263 -0.055669297724402635 -0.04574614403013607 0.0583629734207447 0.07082505093571094 0.08033194691100361 -0.03408099729722125 0.14645237531715857 -0.10515100307352122 -0.009554893883245917 0.07294771703743672 0.0907052878798662 0.7506434202316147 0.06580678690418458 0.012159194164778474 0.021015635732290844 -0.058478002889805085 0.33215462608…	[0.22908936440944672, 0.19121719896793365, 0.2159939408302307, 0.002930961549282074, 0.003542669117450714, 0.0012755878269672394, 0.0089351125061512, 0.31088337302207947, 0.02979438751935959, 0.028878910467028618, 0.0342017337679863, 0.018121294677257538, 0.1401243507862091, 0.3285592496395111, 0.6773977279663086, 0.06251125037670135, 0.010728716850280762, 0.07508490979671478, 0.03405927866697311…	[0.09879420697689056, 0.21583014726638794, 0.9741033315658569, 0.07877715677022934, 0.09466511011123657, 0.0681113451719284, 0.05882585048675537, 0.0524137020111084, 0.09315067529678345, 0.0539778470993042, 0.05024528503417969, 0.04178863763809204, 0.20566438138484955, 0.09397371858358383, 0.994290828704834, 0.05943426489830017, 0.06132116913795471, 0.14752274751663208, 0.0507921427488327, 0.3660…	60.82
1	753	753	Y	GGUCUCUCUGGUUAGACCAGAUCUGAGCCUGGGAGCUCUCUGGCUAACUAGGGAACCCACUGCUUAAGCCUCAAUAAAGCUUGCCUUGAGUGCUCAAAGUAGUGUGUGCCCGUCUGUUGUGUGACUCUGGUAACUAGAGAUCCCUCAGACCCUUUUAGUCAGUGUGGAAAAUCUCUAGCAGUGGCGCCCGAACAGGGACUUGAAAGCGAAAGUAAAGCCAGAGGAGAUCUCUCGACGCAGGACUCGGCUUGCUGAAGCGCGCACGGCAAGAGGCGAGGGGCGGCGACUGGUGAGUACGCCAAAAAUUUUGACUAGCGGAGGCUAGAAGGAGAGAGAUGGGUGCGAGAGCGUCGGUAUUAAGCGGGGGAGAAUUAGAUAAAUGGGAAAAAAUUCGGUUAA…	nan nan nan -0.137611 0.173722 0.104233 -0.512582 0.146099 -0.082495 -0.057997 nan -0.047436 nan 0.129467 0.158258 0.298001 -0.091491 0.025921 0.028321 0.001949 1.06816 0.155092 0.826075 0.353054 0.010625 0.025215 0.011467 0.019425 0.368303 0.515791 0.041974 0.19666 0.107946 2.41273 0.032547 2.6e-05 0.017993 -0.026789 0.086887 0.015742 0.116079 0.0205 0.083881 0.071771 0.059657 0.109893 0.027588 …	nan nan nan -0.11388000191991633 0.14376366492163928 0.08625803344295616 -0.42418730438783636 0.12090424748383381 -0.06826874856213164 -0.047995425302841975 nan -0.03925566830466424 nan 0.10714043360316985 0.13096642960113739 0.24661076841340435 -0.07571338959570866 0.02145092710441862 0.023437047433518758 0.0016128952172567376 0.8839559544715017 0.12834640586699947 0.6836184795255821 0.292169886…	[0.21128803491592407, 0.30717939138412476, 0.24968653917312622, 0.13033825159072876, 0.0005707517266273499, 0.016982551664114, 0.00019189342856407166, 0.097185418009758, 0.2668454945087433, 0.15764275193214417, 0.1858651041984558, 0.3474627733230591, 0.25344711542129517, 0.5487197637557983, 0.2841692268848419, 0.4589540958404541, 0.03380637988448143, 0.055439211428165436, 0.3041968047618866, 0.08…	[0.06479983031749725, 0.06128275394439697, 0.1255037933588028, 0.3904249668121338, 0.09242846816778183, 0.3235962986946106, 0.09634386003017426, 0.2483779937028885, 0.10873284190893173, 0.08148640394210815, 0.06541203707456589, 0.10932522267103195, 0.13166895508766174, 0.7076705098152161, 0.03295183181762695, 0.8895123600959778, 0.2439613938331604, 0.29038554430007935, 0.6057018041610718, 0.03803…	13.01
1177	1351	175	Y	GCAUUCUGGACAUAAGACAAGGACCAAAGGAACCCUUUAGAGACUAUGUAGACCGAUUCUAUAAAACUCUAAGAGCCGAGCAAGCUUCACAAGAGGUAAAAAAUUGGAUGACAGAAACCUUGUUGGUCCAAAAUGCGAACCCAGAUUGUAAGACUAUUUUAAAAGCAUUGGGACC	0.102052 -0.068429 0.153891 0.420136 -0.008228 0.03474 0.216935 0.004667 0.094837 0.380061 0.397161 1.52667 2.23285 0.266374 1.0117 0.766524 0.21941 0.584665 0.114743 0.647626 0.519511 -0.03942 0.29937 0.120757 0.091227 0.83058 0.393294 0.877577 0.547703 0.365595 1.25431 0.572981 0.029156 -0.018816 -0.044987 0.228884 0.336869 0.668942 0.475027 0.424388 0.006938 -0.025706 0.113576 0.243804 0.62168…	0.08445314659388639 -0.05662842833333058 0.12735251815231227 0.3476836044111733 -0.0068090825282649745 0.028749091763724505 0.1795245889972244 0.003862176489962645 0.07848237235452911 0.31451953266588656 0.32867064001072505 1.263395967844712 1.8477953236796851 0.22043784022655014 0.837232473729421 0.6343370413096477 0.18157277558660892 0.4838396009222219 0.0949555853841405 0.5359429851057527 0.42…	[0.05368754267692566, 0.02693037874996662, 0.006573513150215149, 0.04237741604447365, 0.02012641355395317, 0.011367924511432648, 0.0012984499335289001, 0.0011582374572753906, 0.003492947667837143, 0.06793580949306488, 0.15154337882995605, 0.8766880631446838, 0.9665639996528625, 0.4611758887767792, 0.6394718885421753, 0.5203519463539124, 0.0765208899974823, 0.03410496935248375, 0.01968690380454063…	[0.13141745328903198, 0.12238474190235138, 0.07421176135540009, 0.029594838619232178, 0.028180330991744995, 0.31891176104545593, 0.040087565779685974, 0.05288323760032654, 0.04013928771018982, 0.15148267149925232, 0.19618624448776245, 0.8814878463745117, 0.4708232283592224, 0.8583614826202393, 0.8684594631195068, 0.14513272047042847, 0.26783594489097595, 0.23161306977272034, 0.1038302406668663, 0…	48
1395	1715	321	Y	GGGGGACCCGGCCAUAAAGCAAGAGUUUUGGCUGAAGCAAUGAGCCAAGUAACAAAUCCAGCUACCAUAAUGAUACAGAAAGGCAAUUUUAGGAACCAAAGAAAGACUGUUAAGUGUUUCAAUUGUGGCAAAGAAGGGCACAUAGCCAAAAAUUGCAGGGCCCCUAGGAAAAAGGGCUGUUGGAAAUGUGGAAAGGAAGGACACCAAAUGAAAGAUUGUACUGAGAGACAGGCUAAUUUUUUAGGGAAGAUCUGGCCUUCCCACAAGGGAAGGCCAGGGAAUUUUCUUCAGAGCAGACCAGAGCCAACAGCCCCACCAGAA	0.246603 0.045484 -0.094173 -0.146615 -0.15932 0.205629 0.134276 0.04899 -0.148547 0.044377 0.163255 -0.025667 -0.039305 1.28949 1.8364 1.49813 1.9547 1.52553 0.579451 0.453822 0.563341 2.0426 0.998802 -0.00482 0.653723 0.111586 0.218659 0.115053 0.275722 0.058153 0.030099 0.023091 0.065285 0.651341 0.728789 0.727186 0.287726 0.391659 0.302736 1.36372 0.536443 0.164927 0.211932 0.044391 0.094271 …	0.20407634646545061 0.03764029043699613 -0.07793287906347807 -0.12133126335459034 -0.1318452878467642 0.1701683071468885 0.11112012221260426 0.04054168121775658 -0.12293009021951597 0.036724192435198685 0.13510169763635133 -0.021240729369588856 -0.032526858139700396 1.0671176263213908 1.519713071816456 1.2397776869311627 1.6176122530383505 1.2624525606883894 0.4795247545072519 0.37556045833036794…	[0.1248205304145813, 0.060378432273864746, 0.02297833561897278, 0.022902365773916245, 0.13893035054206848, 0.5258576273918152, 0.1372198909521103, 0.05680648237466812, 0.04074149206280708, 0.12766508758068085, 0.2021603286266327, 0.1142621785402298, 0.07197274267673492, 0.4407739043235779, 0.7954171299934387, 0.2550363838672638, 0.5556797981262207, 0.08517518639564514, 0.23236888647079468, 0.1818…	[0.12281149625778198, 0.08155134320259094, 0.051030613481998444, 0.05958819389343262, 0.17928051948547363, 0.6202020645141602, 0.1982279121875763, 0.15172269940376282, 0.22334040701389313, 0.14874392747879028, 0.24199172854423523, 0.3979966342449188, 0.8563508987426758, 0.5975666046142578, 0.2722351849079132, 0.5960344672203064, 0.6033810973167419, 0.8682025074958801, 0.18369048833847046, 0.60572…	33.64
2015	2174	160	Y	GGUACAGUAUUAGUAGGACCUACACCUGUCAACAUAAUUGGAAGAAAUCUGUUGACUCAGAUUGGCUGCACUUUAAAUUUUCCCAUUAGUCCUAUUGAGACUGUACCAGUAAAAUUAAAGCCAGGAAUGGAUGGCCCAAAAGUUAAACAAUGGCCAUUGA	-0.064813 0.005577 0.009523 0.035753 0.029801 -0.022064 -0.021979 -0.029413 0.125979 0.044112 0.110208 0.031788 0.063932 0.057931 0.057558 -0.034696 0.023859 0.011635 -0.000697 0.157159 0.784636 1.20844 0.938907 0.339889 0.032761 0.354198 -0.031026 0.162401 0.07079 0.02796 0.18193 0.366344 0.003244 0.829904 2.01359 1.02311 1.95416 0.203074 0.187559 0.738082 0.956188 1.31993 1.55126 2.11361 0.2160…	-0.05363600703748637 0.004615247114746447 0.007880759955841926 0.02958740005263219 0.024661821636463847 -0.018259066225527275 -0.018188724463871642 -0.024340732183259325 0.10425393872487766 0.036504891648860546 0.09120264551227837 0.02630616375893133 0.052906935366679196 0.047940806993791725 0.04763213079264407 -0.028712679557691002 0.019744518721666753 0.009628545845450047 -0.0005768024455761652…	[0.0010182484984397888, 0.0005365349352359772, 0.00758795440196991, 0.0007003284990787506, 0.0006015300750732422, 0.0005131326615810394, 0.00033917278051376343, 0.047685086727142334, 0.07911010086536407, 0.14961060881614685, 0.02608393505215645, 0.0036748945713043213, 0.01815563440322876, 0.007326394319534302, 0.005339585244655609, 0.0004888102412223816, 0.009158194065093994, 0.004676122218370438…	[0.050814077258110046, 0.0394783616065979, 0.019284307956695557, 0.0443074107170105, 0.035256460309028625, 0.0971108227968216, 0.05193305015563965, 0.037634313106536865, 0.2724876403808594, 0.061547309160232544, 0.0337938517332077, 0.11348333209753036, 0.12954916059970856, 0.05306544899940491, 0.14659720659255981, 0.05038437247276306, 0.047046929597854614, 0.1635826975107193, 0.23088406026363373,…	56.88
2607	2920	314	Y	UUAGAAAACAAAAUCCAGACAUAGUCAUCUAUCAAUACAUGGAUGAUUUGUAUGUAGGAUCUGACUUAGAAAUAGGGCAGCAUAGAACAAAAAUAGAGGAACUGAGACAACAUCUGUUGAGGUGGGGAUUUACCACACCAGACAAAAAACAUCAGAAAGAACCUCCAUUCCUUUGGAUGGGUUAUGAACUCCAUCCUGAUAAAUGGACAGUACAGCCUAUAGUGCUGCCAGAAAAGGACAGCUGGACUGUCAAUGACAUACAGAAAUUAGUGGGAAAAUUGAAUUGGGCAAGUCAGAUUUAUGCAGGGAUUAAA	0.117942 0.43075 0.998818 1.00666 0.188603 1.40955 0.145998 0.266376 1.00056 0.226244 1.68897 0.36537 0.275404 0.02981 -0.023141 -0.025713 0.862943 0.240836 0.17702 0.284179 0.672227 0.572803 0.258229 0.148363 -0.105746 -0.079523 0.208356 -0.064413 -0.048982 0.200338 0.342327 0.132311 0.28294 0.416847 0.672716 1.11556 1.43671 0.485666 0.377939 0.181201 -0.115258 0.000556 -0.00502 -0.078039 -0.132…	0.09760291827280357 0.35646722156661864 0.8265719728629759 0.8330616210383107 0.15607843851219727 1.166473295784625 0.12082066491998417 0.2204394953268244 0.8280135652018477 0.18722825322372155 1.397707355100109 0.30236199360138233 0.2279106179647894 0.02466926958769797 -0.01915033772321096 -0.02127879667589661 0.7141285979811087 0.1993038648246504 0.14649292527387772 0.2351723704180618 0.5563015…	[0.8112924695014954, 0.8571261763572693, 0.5185233950614929, 0.8255780935287476, 0.26533910632133484, 0.5281928181648254, 0.42671680450439453, 0.05919768661260605, 0.43963950872421265, 0.09339478611946106, 0.583799421787262, 0.17926906049251556, 0.13272088766098022, 0.14182858169078827, 0.03506441414356232, 0.008245423436164856, 0.21226175129413605, 0.41981446743011475, 0.22078627347946167, 0.063…	[0.20526058971881866, 0.25743865966796875, 0.8675046563148499, 0.11037297546863556, 0.8957408666610718, 0.7747955918312073, 0.8575299978256226, 0.800115704536438, 1.0021860599517822, 0.7912453413009644, 0.6150979995727539, 0.4613315761089325, 0.3114340007305145, 0.11881766468286514, 0.14725197851657867, 0.19487082958221436, 0.8824597001075745, 0.14840370416641235, 0.5529664754867554, 0.4067702293…	30.89
3102	3159	58	Y	AAUGGACAUAUCAAAUUUAUCAAGAGCCAUUUAAAAAUCUGAAAACAGGAAAAUAUGC	0.268239 0.5504 0.440023 0.055659 0.183124 0.592839 0.163912 1.0331 1.84394 0.805892 1.0624 1.02578 0.465321 6.70719 0.077906 0.160699 0.545318 0.048003 1.63151 -0.127018 0.054304 -0.146238 0.416482 1.47241 0.668196 0.124512 0.007591 -0.005666 -0.038969 0.054393 0.267907 0.77257 0.666787 1.38678 0.0571 0.121368 0.516631 0.064061 0.060009 0.179578 0.259104 0.010021 0.618819 0.305652 0.679785 0.038…	0.22198122123228836 0.45548359547363176 0.3641410939881793 0.04606061308224359 0.1515442913108891 0.4906039957430821 0.13564539807644246 0.8549420466638971 1.525952799850379 0.6669160351079871 0.8791892656816613 0.8488843796601416 0.385076457357169 5.550536004223816 0.06447112098286475 0.13298647948585965 0.4512779856767622 0.03972488923241414 1.350156324220903 -0.10511376331735058 0.044939282646…	[0.00255005806684494, 0.0005831457674503326, 0.019340362399816513, 0.0002545490860939026, 0.06357329338788986, 0.03348314017057419, 0.175681933760643, 0.5109713077545166, 0.7800491452217102, 0.01276920735836029, 0.16729609668254852, 0.17544741928577423, 0.0396103598177433, 0.5818861126899719, 0.5724546909332275, 0.8333677649497986, 0.974553108215332, 0.9134942293167114, 0.613065242767334, 0.51212…	[0.16520735621452332, 0.028766348958015442, 0.0290917307138443, 0.028959810733795166, 0.04031342267990112, 0.40998685359954834, 0.30302053689956665, 0.351344496011734, 0.14324302971363068, 0.3871937096118927, 0.10327527672052383, 0.4367510676383972, 0.8212504982948303, 0.5839387774467468, 0.6908966302871704, 0.17722703516483307, 0.216379776597023, 0.1660442054271698, 0.3001805543899536, 0.3327446…	100
4678	4773	96	Y	UUUCAAGGAAAGCUAAGGACUGGUUUUAUAGACAUCACUAUGAAAGUACUAAUCCAAAAAUAAGUUCAGAAGUACACAUCCCACUAGGGGAUGCUA	-0.138293 0.780098 0.399964 0.058825 0.08209 0.082681 0.166178 0.300924 1.17965 1.0444 0.254524 0.075906 0.03399 0.268979 0.057574 0.512397 0.259331 -0.061133 0.286483 0.145003 0.87331 0.286207 0.191614 0.101656 0.063164 0.049021 0.083 1.89456 -0.023593 0.484376 0.240993 0.110802 0.270285 0.864074 0.072975 -0.000457 0.048358 0.027788 0.197567 0.776979 0.132229 0.32569 0.531963 0.115758 0.261088 0…	-0.11444439111343561 0.6455702068709832 0.3309902630450866 0.048680636816381524 0.06793359075659598 0.0684226728876369 0.13752062668716783 0.2490296974642209 0.9762195192595744 0.8642933632134103 0.21063137110161817 0.06281602070861464 0.02812842916088071 0.22259360833376093 0.047645371594838073 0.4240342076124682 0.21460940461077832 -0.050590622532866156 0.2370790459339979 0.11999725253354475 0.…	[0.2907640039920807, 0.5615774989128113, 0.4536195695400238, 0.2665303945541382, 0.561543345451355, 0.2926828861236572, 0.3389430344104767, 0.24631719291210175, 0.39703309535980225, 0.2381923794746399, 0.3522399663925171, 0.23353314399719238, 0.34673231840133667, 0.5875968933105469, 0.38594287633895874, 0.41200560331344604, 0.2816959023475647, 0.06661289930343628, 0.08024068176746368, 0.139382392…	[0.12781180441379547, 0.12153254449367523, 0.13549011945724487, 0.4585454761981964, 0.5888625979423523, 0.7358086705207825, 0.08592399954795837, 0.08183661103248596, 0.2799696624279022, 0.482843279838562, 0.7149232029914856, 0.1158536821603775, 0.545208215713501, 0.16123992204666138, 0.7236535549163818, 0.8055004477500916, 0.07452099025249481, 0.045960649847984314, 0.19994330406188965, 0.47860646…	0
5266	5346	81	Y	GGCAGGAGUGGAAGCCAUAAUAAGAAUUCUGCAACAACUGCUGUUUAUCCAUUUCAGAAUUGGGUGUCGACAUAGCAGAAU	-0.038829 0.06482 0.053122 0.620318 0.098594 0.490167 1.22696 0.229969 0.199133 -0.06574 0.336111 0.484989 0.535486 0.049364 0.113455 0.190281 1.06736 1.16522 1.64679 1.7239 1.22685 0.283136 1.37199 1.70707 0.373806 0.461753 0.133047 0.182978 -0.029795 0.024411 0.116032 0.009953 0.326076 0.807696 0.129357 0.150391 0.472662 0.094961 -0.017145 0.044437 -0.05078 0.070048 0.315245 0.079245 0.285288 0…	-0.03213294427442887 0.053641799888446244 0.04396111838435732 0.5133442459611416 0.08159147821970794 0.4056377680641782 1.0153709162469609 0.19031087748451242 0.16479254145612413 -0.0544031460146013 0.27814870413924025 0.40135271345414464 0.4431415127285487 0.040851184969041346 0.09388970080752343 0.15746706764229312 0.8832939143618017 0.9642779707808598 1.362801290316174 1.426613681389887 1.0152…	[0.12078999727964401, 0.007019359618425369, 0.05468636006116867, 0.07608208060264587, 0.06099122762680054, 0.26649340987205505, 0.22591513395309448, 0.12422120571136475, 0.40476053953170776, 0.11728113889694214, 0.33447784185409546, 0.236358180642128, 0.2680566906929016, 0.2935210168361664, 0.26048219203948975, 0.19749438762664795, 0.8151482343673706, 0.8492757081985474, 0.6877384185791016, 0.610…	[0.059540390968322754, 0.1250678151845932, 0.16496409475803375, 0.4705813229084015, 0.058453693985939026, 0.13299882411956787, 0.6895672082901001, 0.22575990855693817, 0.12949155271053314, 0.0999278649687767, 0.12137386947870255, 0.5968810319900513, 0.7193527221679688, 0.13024869561195374, 0.5445494055747986, 0.45349740982055664, 0.6947396993637085, 0.3319924771785736, 0.8060694932937622, 0.71688…	90.12
5449	6017	569	Y	GCUAUUGUAAAAAGUGUUGCUUUCAUUGCCAAGUUUGUUUCAUGACAAAAGCCUUAGGCAUCUCCUAUGGCAGGAAGAAGCGGAGACAGCGACGAAGAGCUCAUCAGAACAGUCAGACUCAUCAAGCUUCUCUAUCAAAGCAGUAAGUAGUACAUGUAAUGCAACCUAUAAUAGUAGCAAUAGUAGCAUUAGUAGUAGCAAUAAUAAUAGCAAUAGUUGUGUGGUCCAUAGUAAUCAUAGAAUAUAGGAAAAUAUUAAGACAAAGAAAAAUAGACAGGUUAAUUGAUAGACUAAUAGAAAGAGCAGAAGACAGUGGCAAUGAGAGUGAAGGAGAAGUAUCAGCACUUGUGGAGAUGGGGGUGGAAAUGGGGCACCAUGCUCCUUGGGAUAUUGAUGAUC…	0.082471 0.038582 0.32492 0.379256 0.422685 0.202702 1.28425 1.30371 0.265594 1.4343 0.122049 0.093781 1.3753 0.954376 1.08491 0.670406 -0.083598 0.119692 0.04462 0.124534 0.054328 0.201977 0.193234 0.053318 0.330136 0.001342 0.02907 0.03231 0.028859 0.151721 0.271719 1.08449 0.681677 -0.010686 -0.237473 0.393674 0.394077 0.015137 0.704558 0.371765 -0.031592 0.410656 0.134435 0.121094 0.426423 0.…	0.06824888735884065 0.03192853939055898 0.26888759055467376 0.31385335480550086 0.34979302971070503 0.16774606789552346 1.0627812636028553 1.078885389271309 0.21979235111959258 1.1869551616784701 0.10100166668597618 0.07760847940972504 1.138129703588092 0.7897939896688642 0.8978174192683465 0.5547945772294615 -0.06918153636338058 0.09905113101277242 0.03692528711852008 0.10305812877673194 0.04495…	[0.07684530317783356, 0.17891386151313782, 0.3548959493637085, 0.39291641116142273, 0.47373881936073303, 0.6408629417419434, 0.3886561393737793, 0.8481541872024536, 0.15578877925872803, 0.1654735505580902, 0.06797812879085541, 0.1539931446313858, 0.28435030579566956, 0.7292343974113464, 0.5476169586181641, 0.35810691118240356, 0.5345464944839478, 0.2853781282901764, 0.25129464268684387, 0.0889312…	[0.12892338633537292, 0.33177587389945984, 0.11307287961244583, 0.3681603968143463, 0.1335327923297882, 0.14733877778053284, 0.11098584532737732, 0.30558961629867554, 0.5196658372879028, 0.6720941662788391, 0.7813140153884888, 0.6636384725570679, 0.45890140533447266, 0.1104985773563385, 0.25259098410606384, 0.1977701485157013, 0.12857261300086975, 0.13095155358314514, 0.17793533205986023, 0.34089…	18.1
6839	7182	344	Y	UCUUUAAGCAAUCCUCAGGAGGGGACCCAGAAAUUGUAACGCACAGUUUUAAUUGUGGAGGGGAAUUUUUCUACUGUAAUUCAACACAACUGUUUAAUAGUACUUGGUUUAAUAGUACUUGGAGUACUGAAGGGUCAAAUAACACUGAAGGAAGUGACACAAUCACACUCCCAUGCAGAAUAAAACAAUUUAUAAACAUGUGGCAGGAAGUAGGAAAAGCAAUGUAUGCCCCUCCCAUCAGUGGACAAAUUAGAUGUUCAUCAAAUAUUACUGGGCUGCUAUUAACAAGAGAUGGUGGUAAUAACAACAAUGGGUCCGAGAUCUUCAGACCUGGAGGAGGCGAU	0.379546 0.294693 0.0523 1.41262 0.121591 0.368365 1.38491 0.014191 0.134319 0.090978 1.77754 0.100196 -0.101172 -0.022706 0.106124 -0.071718 0.148745 0.44252 0.154086 1.18044 -0.03976 1.77985 0.117232 -0.129766 0.040099 0.081228 -0.211008 -0.060218 0.152165 0.462762 0.083333 1.5079 0.342708 0.116498 0.186613 0.630283 0.29293 0.583585 0.48109 0.322144 0.097405 -0.01448 0.346171 0.022376 0.319671 …	0.31409334434526714 0.24387323255979462 0.04328087217164052 1.1690138747055991 0.1006226487231729 0.3048405062620719 1.1460824604058637 0.011743763995941695 0.11115570686850063 0.0752888563753635 1.471003470745275 0.08291721353938228 -0.08372490247321634 -0.018790353413561563 0.08782293075225962 -0.0593502407343349 0.1230939451466667 0.36620748668058056 0.12751389042905165 0.9768732838679031 -0.0…	[0.44863107800483704, 0.34107261896133423, 0.3830370306968689, 0.7900635600090027, 0.555631160736084, 0.5119757652282715, 0.16742202639579773, 0.21386660635471344, 0.12922638654708862, 0.17012295126914978, 0.7528494596481323, 0.21872656047344208, 0.007454652339220047, 0.04025560989975929, 0.06458565592765808, 0.07485394179821014, 0.09616604447364807, 0.08804511278867722, 0.09088549017906189, 0.22…	[0.24413418769836426, 0.5939733982086182, 0.15059219300746918, 0.22349265217781067, 0.2505824565887451, 0.7984994649887085, 0.8636854290962219, 0.15748608112335205, 0.5966533422470093, 0.7839483618736267, 0.6584179401397705, 0.14774855971336365, 0.20463863015174866, 0.19827786087989807, 0.13912871479988098, 0.3520740270614624, 0.802527904510498, 0.0729534775018692, 0.11985769122838974, 0.95521402…	25.87
7244	7603	360	Y	GAGUAGCACCCACCAAGGCAAAGAGAAGAGUGGUGCAGAGAGAAAAAAGAGCAGUGGGAAUAGGAGCUUUGUUCCUUGGGUUCUUGGGAGCAGCAGGAAGCACUAUGGGCUGCACGUCAAUGACGCUGACGGUACAGGCCAGACAAUUAUUGUCUGAUAUAGUGCAGCAGCAGAACAAUUUGCUGAGGGCUAUUGAGGCGCAACAGCAUCUGUUGCAACUCACAGUCUGGGGCAUCAAACAGCUCCAGGCAAGAAUCCUGGCUGUGGAAAGAUACCUAAAGGAUCAACAGCUCCUGGGGAUUUGGGGUUGCUCUGGAAAACUCAUUUGCACCACUGCUGUGCCUUGGAAUGCUAGUUGGA	1.08911 1.1155 1.02512 0.301714 0.38081 0.140186 0.071044 0.443972 -0.072802 0.176413 0.013119 0.737481 0.173052 -0.079716 0.32852 0.016326 0.013778 -0.014305 0.078 0.241918 0.349995 0.658928 1.53847 0.361781 0.589867 3.61986 0.353466 1.12898 0.063455 0.06467 0.026673 -0.054578 0.008866 0.044546 0.045086 0.03453 0.050904 0.258098 0.013783 -0.033964 0.140718 0.127183 0.025616 0.625078 0.228979 0.0…	0.9012931298442717 0.9231321779630018 0.8483381965696393 0.24968346207254966 0.31513936771859324 0.11601094352301335 0.0587924719419126 0.36740908947968615 -0.06024730508297846 0.1459906023406428 0.010856630248943632 0.6103025026771247 0.1432092063297655 -0.0659689867310611 0.27186677104832396 0.013510583538703692 0.011401985789309045 -0.011838104711573951 0.06454891069575451 0.2001992740730197 0…	[0.33807632327079773, 0.21657833456993103, 0.42458009719848633, 0.4052622318267822, 0.1514171063899994, 0.10155822336673737, 0.09132891148328781, 0.2626018524169922, 0.02705277130007744, 0.11824458837509155, 0.050065815448760986, 0.2514088749885559, 0.043476853519678116, 0.047352392226457596, 0.060823071748018265, 0.07282929122447968, 0.08070439100265503, 0.012056820094585419, 0.09647224843502045…	[0.0905771404504776, 0.6485380530357361, 0.1393037736415863, 0.154621422290802, 0.3588647246360779, 0.12122219055891037, 0.4365127682685852, 0.48426103591918945, 0.7870305776596069, 0.5184165239334106, 0.7067099809646606, 0.8462179899215698, 0.22979426383972168, 0.20828348398208618, 0.24163249135017395, 0.27810320258140564, 0.07062724232673645, 0.11193099617958069, 0.22401002049446106, 0.29594218…	29.44
7965	8094	130	Y	AGAAGGUGGAGAGAGAGACAGAGACAGAUCCAUUCGAUUAGUGAACGGAUCCUUAGCACUUAUCUGGGACGAUCUGCGGAGCCUGUGCCUCUUCAGCUACCACCGCUUGAGAGACUUACUCUUGAUUGUA	0.442506 1.55698 0.769176 1.71175 0.255829 0.155863 0.151773 0.70493 0.084127 1.07487 -0.007905 0.072822 -0.004556 0.101485 -0.023764 0.093106 0.047648 0.291866 0.494543 0.833192 1.00634 0.089481 0.088405 0.920565 0.274456 0.955666 0.304426 0.077709 0.005252 -0.020721 0.014861 0.153519 0.135448 0.154978 0.093914 0.673279 1.06139 0.160027 0.698462 1.43021 1.06905 0.072145 0.058671 0.329348 0.25737…	0.36619590097866084 1.2884790125009724 0.6365317042733034 1.4165589472238176 0.2117113240305664 0.12898444702272288 0.12559976696188138 0.583364918163567 0.06961931038591973 0.8895088158916108 -0.006541783833973582 0.060263856085720956 -0.0037703184247417634 0.0839839256661365 -0.019665901458639872 0.07704988306716562 0.039431108933734756 0.2415337483221421 0.4092591274642374 0.6895081538515011 0…	[0.3540222644805908, 0.3251241445541382, 0.622153639793396, 0.4778590500354767, 0.15337318181991577, 0.05789569765329361, 0.10460921376943588, 0.05815766379237175, 0.11001790314912796, 0.15830589830875397, 0.01097264513373375, 0.005441147834062576, 0.002427350729703903, 0.0026870928704738617, 0.0021263286471366882, 0.004258852452039719, 0.09921067953109741, 0.05189504101872444, 0.0780611634254455…	[0.597484827041626, 0.09002793580293655, 0.697535514831543, 0.714004635810852, 0.1379730999469757, 0.145186185836792, 0.0935807004570961, 0.11523549258708954, 0.08677393198013306, 0.831550121307373, 0.10379485040903091, 0.9750546216964722, 0.11505468189716339, 0.4153233468532562, 0.08670392632484436, 0.5399116277694702, 0.09578992426395416, 0.5577059984207153, 0.27568793296813965, 0.2628376483917…	76.92
8501	8785	285	Y	UGGCUAGAAGCACAAGAGGAGGAAGAGGUGGGUUUUCCAGUCACACCUCAGGUACCUUUAAGACCAAUGACUUACAAGGCAGCUGUAGAUCUUAGCCACUUUUUAAAAGAAAAGGGGGGACUGGAAGGGCUAAUUCACUCCCAAAGAAGACAAGAUAUCCUUGAUCUGUGGAUCUACCACACACAAGGCUACUUCCCUGAUUGGCAGAACUACACACCAGGGCCAGGGGUCAGAUAUCCACUGACCUUUGGAUGGUGCUACAAGCUAGUACCAGUUGAGCCAGAU	0.05745 0.004231 0.052818 0.061656 0.362077 2.43888 0.833022 1.48647 0.419049 0.160693 0.434138 0.226711 0.315658 0.724571 1.5842 0.539851 1.02109 0.514898 0.168099 0.440548 0.466525 0.310785 1.44389 1.15105 0.509072 0.347595 0.030686 0.170518 0.196545 -0.041657 0.17613 0.280779 0.067923 0.075684 0.053291 0.038815 -0.050091 -0.033499 0.094513 0.075669 0.056041 -0.058193 0.030592 -0.114372 0.05462…	0.04754275537783457 0.0035013646301761195 0.043709543142671295 0.051023431254582564 0.2996368709998295 2.0182954784315608 0.6893674703281899 1.2301284523322846 0.3467840574121183 0.1329815141850369 0.35927096143119835 0.18761471913775896 0.2612228211846215 0.5996188304068402 1.3110049272335165 0.4467537690770995 0.8450031695170253 0.42610391050541796 0.1391103505005851 0.3645755578101699 0.386072…	[0.21235087513923645, 0.08886855095624924, 0.03624964877963066, 0.12036193162202835, 0.23102852702140808, 0.446950763463974, 0.27878671884536743, 0.5700170397758484, 0.2859399914741516, 0.42643463611602783, 0.46456968784332275, 0.093332439661026, 0.2932204008102417, 0.47309353947639465, 0.34178626537323, 0.26024678349494934, 0.5571671724319458, 0.30482882261276245, 0.13234376907348633, 0.14454469…	[0.09277999401092529, 0.07021155953407288, 0.11355318129062653, 0.28063032031059265, 0.10334929823875427, 0.5530743598937988, 0.08039607852697372, 0.9436067938804626, 0.8388340473175049, 0.16602465510368347, 0.6224749088287354, 0.5514633059501648, 0.7059674263000488, 0.767448902130127, 0.6873310804367065, 0.13719427585601807, 0.9399551153182983, 0.09477134048938751, 0.08504802733659744, 0.7510731…	31.93
8807	8914	108	Y	GGAGAGAACACCAGCUUGUUACACCCUGUGAGCCUGCAUGGAAUGGAUGACCCUGAGAGAGAAGUGUUAGAGUGGAGGUUUGACAGCCGCCUAGCAUUUCAUCACGUG	0.450249 0.293283 0.965851 -0.046302 0.498649 0.107524 0.666577 0.014059 0.1517 0.168914 0.050303 -0.039283 0.374167 0.269374 0.126829 0.207014 0.156637 0.473965 0.032415 0.638312 1.39578 0.558951 0.356289 0.035355 -0.054876 -0.075993 0.154513 0.576541 0.050569 0.199609 1.67785 0.418717 -0.111835 0.029763 0.12342 0.192214 0.058949 1.10285 0.447598 0.088164 0.409154 1.25812 0.837563 0.143569 0.027…	0.37260362169042016 0.24270638686644833 0.7992901274923742 -0.038317226449164424 0.4126570483272729 0.08898150094423471 0.5516258877544096 0.011634527377841188 0.12553935580187126 0.13978480386234202 0.04162825454780178 -0.03250865203668364 0.3096419521576715 0.2229204906379253 0.10495735634143395 0.1713144640868067 0.12962497082885768 0.39222980074247804 0.026825037694908748 0.5282351831285699 1…	[0.3373851776123047, 0.32373976707458496, 0.4757923483848572, 0.10714460909366608, 0.1112811341881752, 0.49141958355903625, 0.5290955305099487, 0.5085148215293884, 0.27147021889686584, 0.282306432723999, 0.20700740814208984, 0.1003660261631012, 0.26450207829475403, 0.21352124214172363, 0.24300193786621094, 0.3410135507583618, 0.44003570079803467, 0.26543766260147095, 0.718220055103302, 0.58474874…	[0.08299608528614044, 0.1188364177942276, 0.8468537330627441, 0.17592588067054749, 0.9765785932540894, 0.1565929651260376, 0.719203770160675, 0.8167631030082703, 0.6572483777999878, 0.8307057619094849, 0.43303805589675903, 0.38425230979919434, 0.7077199220657349, 0.09999462962150574, 0.48413920402526855, 0.11018741130828857, 0.18162399530410767, 0.10013511776924133, 0.16098198294639587, 0.1994299…	22.22
8982	9173	192	Y	CUGGGGACUUUCCAGGGAGGCGUGGCCUGGGCGGGACUGGGGAGUGGCGAGCCCUCAGAUGCUGCAUAUAAGCAGCUGCUUUUUGCCUGUACUGGGUCUCUCUGGUUAGACCAGAUCUGAGCCUGGGAGCUCUCUGGCUAACUAGGGAACCCACUGCUUAAGCCUCAAUAAAGCUUGCCUUGAGUGCUUCAA	nan 0.125986 -0.056342 0.006636 -0.030784 0.089979 0.44363 0.052994 0.030646 0.357441 0.035887 0.016052 0.102981 0.241787 0.085445 0.404163 0.230039 0.839126 0.49457 0.152243 0.307443 0.589869 0.538439 -0.010161 0.333402 0.007554 0.036366 0.126818 0.170574 0.21554 0.107811 0.114458 0.370022 0.409679 0.049915 0.44896 0.208159 0.7349 8.3e-05 0.053396 0.095951 -0.162488 0.512936 0.786403 0.147835 0.…	nan 0.10425973157583751 -0.04662582982590001 0.005491622709961883 -0.025475303421257776 0.07446213378837557 0.3671260673327894 0.04385519196680531 0.025361101502334518 0.2958003485641178 0.02969829177100695 0.013283834801131426 0.08522194067127557 0.20009086500505635 0.07071002146665055 0.3344651460708747 0.19036880599411116 0.6944188363652012 0.4092814713179398 0.12598871552633015 0.254424496808…	[0.15870976448059082, 0.15484054386615753, 0.06487622857093811, 0.052562419325113297, 0.11881288141012192, 0.400277316570282, 0.5571469068527222, 0.45630913972854614, 0.8330649137496948, 0.9074146747589111, 0.3424583077430725, 0.2319791465997696, 0.10062920302152634, 0.1663590371608734, 0.15618199110031128, 0.2349536418914795, 0.19833777844905853, 0.4507041573524475, 0.25124111771583557, 0.341806…	[0.2864871919155121, 0.07409676164388657, 0.09685710817575455, 0.060886889696121216, 0.09393222630023956, 0.13054142892360687, 0.9265977144241333, 0.924403190612793, 0.23978526890277863, 0.2964096665382385, 0.1824570745229721, 0.34235310554504395, 0.3294803500175476, 0.4780198335647583, 0.09884727001190186, 0.11051403731107712, 0.14404019713401794, 0.5956735610961914, 0.09739955514669418, 0.17303…	51.56

## Sheet: H. sapiens
Sequence ID	Type	Length	Sequence	DMS in vitro From Study	Re-normalized DMS	RNet Predicted SHAPE	RNet Predicted DMS	Similarity
ENSG00000004399.13	human-mRNA	282	GGGAUGCACCAACUGUGAAUAGCUGCCGCUUGCGCAGAGGACCCGGGGAGGGGUCCCGAGAGGCUCCCCAUGCAACACUGGAAAUGACUGUUCCAGAGAGCGGGCAGACCUGGCAGAGCGCCCCUGGCGCCUGAGACUACCACCCACUCCGUUCCUGCCAGAAACGACCCUCUGUGGCCGAUGGGCCAUGCGGGCCCCUCGCAGCCAACUCAGCCAGUGUUGGGACUGGCUCAGAGCCCAUGGGGGCUGGAGGGGGGCAGCUGGGACUCUGGAAUCUUCUUU	nan nan nan 0.2588 nan nan 0.3125 0.2892 0.2773 0.2742 0.4158 0.7937 0.4492 nan nan nan nan 0.6609 0.5206 nan 0.3819 nan 0.0728 nan nan 0.3991 0.2469 nan 0.4663 nan nan nan 0.4585 nan 0.1818 0.232 nan 0.7554 nan nan 0.3747 0.15 0.1514 0.143 nan nan nan nan 0.582 nan nan nan nan nan 0.159 0.0858 0.3466 nan 0.7154 nan 0.8055 nan nan 0.1976 nan 0.232 0.0485 0.0559 0.2984 0.4311 nan nan 0.3654 0.6498…	nan nan nan 0.3412447257383966 nan nan 0.4120516877637131 0.38132911392405067 0.36563818565400846 0.36155063291139244 0.5482594936708861 1.046545358649789 0.5922995780590717 nan nan nan nan 0.8714398734177217 0.6864451476793249 nan 0.5035601265822786 nan 0.0959915611814346 nan nan 0.5262394514767933 0.32555379746835444 nan 0.6148470464135021 nan nan nan 0.6045622362869199 nan 0.23971518987341772 …	[0.20780208706855774, 0.18052907288074493, 0.13493448495864868, 0.4791463315486908, 0.7233906984329224, 0.447414368391037, 0.33044034242630005, 0.339865505695343, 0.2083638310432434, 0.14129269123077393, 0.3996008336544037, 0.49488162994384766, 0.27196019887924194, 0.4349779486656189, 0.2805249094963074, 0.26474571228027344, 0.5399698615074158, 0.6602738499641418, 0.8034980893135071, 0.4272509217…	[0.10800020396709442, 0.045126065611839294, 0.06691165268421173, 0.712551474571228, 0.29800188541412354, 0.1498020440340042, 0.6513813734054565, 0.7276080846786499, 0.3108387589454651, 0.3393300473690033, 0.7526823282241821, 0.7367630004882812, 0.5454241037368774, 0.13024607300758362, 0.09781984984874725, 0.15736499428749084, 0.12272719293832779, 0.8026142120361328, 0.6185195446014404, 0.19191354…	0
ENSG00000004799.8	human-mRNA	944	GGGGAGAGGUGGAGCAUUUCUCGCGCUACAGCCCGUCCCCGCUGUCCAUGAAGCAGCUACUGGACUUUGGUUCAGAAAAUGCAUGUGAAAGAACUUCUUUUGCAUUUUUGCGACAAGAAUUGCCUGUGAGACUCGCCAACAUUCUGAAGGAAAUUGAUAUCCUCCCGACCCAAUUAGUAAAUACCUCUUCAGUGCAAUUGGUUAAAAGCUGGUAUAUACAGAGCCUGAUGGAUUUGGUGGAAUUCCAUGAGAAAAGCCCAGAUGACCAGAAAGCAUUAUCAGACUUUGUAGAUACACUCAUCAAAGUUCGAAAUAGACACCAUAAUGUAGUCCCUACAAUGGCACAAGGAAUCAUAGAGUAUAAAGAUGCCUGUACAGUUGACCCAGUCACCAAUCAAA…	nan nan nan nan 0.3874 nan 0.3339 nan nan nan nan nan 0.2815 nan 0.1248 0.4652 nan nan nan 0.532 nan 0.8126 nan 0.5233 nan 0.2045 nan 0.4827 0.3597 0.588 nan 0.1006 0.0711 0.1711 nan nan 0.0513 0.0427 0.1165 0.1522 nan 0.2639 nan nan nan 0.2097 0.2054 0.3612 nan nan 0.7316 0.8936 nan 0.1255 0.1655 nan 0.364 nan 0.7697 0.4035 nan nan nan 0.1639 0.123 nan nan nan nan nan nan nan 0.2235 0.5931 nan 0…	nan nan nan nan 0.5108122362869199 nan 0.44026898734177217 nan nan nan nan nan 0.37117616033755274 nan 0.16455696202531644 0.6133966244725739 nan nan nan 0.7014767932489452 nan 1.0714662447257384 nan 0.6900052742616034 nan 0.2696466244725738 nan 0.6364715189873418 0.47428797468354433 0.7753164556962026 nan 0.13264767932489452 0.09375 0.2256065400843882 nan nan 0.06764240506329114 0.05630274261603…	[0.13313935697078705, 0.13388457894325256, 0.17892956733703613, 0.06410125643014908, 0.5752861499786377, 0.09814994782209396, 0.39749059081077576, 0.16910529136657715, 0.35818833112716675, 0.3909301161766052, 0.266140341758728, 0.1847030222415924, 0.42041313648223877, 0.10093685984611511, 0.2242525964975357, 0.38708776235580444, 0.20512789487838745, 0.43904900550842285, 0.17905601859092712, 0.172…	[0.15804001688957214, 0.08332052826881409, 0.07697461545467377, 0.14144429564476013, 0.949068546295166, 0.08399995416402817, 0.8558934330940247, 0.1367650032043457, 0.3005666732788086, 0.18448325991630554, 0.2116979956626892, 0.09579353779554367, 0.9360817670822144, 0.18602563440799713, 0.5057685971260071, 0.7077921628952026, 0.08210670202970505, 0.09966292232275009, 0.09870859235525131, 0.253117…	0
ENSG00000005001.10	human-mRNA	567	GGGACUGGCGGGGAGCAGGACAGGGACCCAUCACUGAGGACAUGCUGUGUGCCGGCUACUUGGAGGGGGAGCGGGAUGCUUGUCUGGGCGACUCCGGGGGCCCCCUCAUGUGCCAGGUGGACGGCGCCUGGCUGCUGGCCGGCAUCAUCAGCUGGGGCGAGGGCUGUGCCGAGCGCAACAGGCCCGGGGUCUACAUCAGCCUCUCUGCGCACCGCUCCUGGGUGGAGAAGAUCGUGCAAGGGGUGCAGCUCCGCGGGCGCGCUCAGGGGGGUGGGGCCCUCAGGGCACCGAGCCAGGGCUCUGGGGCCGCCGCGCGCUCCUAGGGCGCAGCGGGACGCGGGGCUCGGAUCUGAAAGGCGGCCAGAUCCACAUCUGGAUCUGGAUCUGCGGCGGCCUCGG…	nan nan nan nan nan nan nan nan nan nan nan nan nan nan nan nan nan nan nan nan nan nan nan nan nan nan nan nan nan nan nan nan nan nan nan nan nan nan nan nan nan nan nan nan nan nan nan nan nan nan nan nan nan nan nan nan nan nan nan nan nan nan nan nan nan nan nan nan nan nan nan nan nan nan nan nan nan nan nan nan nan nan nan nan nan nan nan nan nan nan nan nan nan nan nan nan nan nan nan nan…	nan nan nan nan nan nan nan nan nan nan nan nan nan nan nan nan nan nan nan nan nan nan nan nan nan nan nan nan nan nan nan nan nan nan nan nan nan nan nan nan nan nan nan nan nan nan nan nan nan nan nan nan nan nan nan nan nan nan nan nan nan nan nan nan nan nan nan nan nan nan nan nan nan nan nan nan nan nan nan nan nan nan nan nan nan nan nan nan nan nan nan nan nan nan nan nan nan nan nan nan…	[0.2071254849433899, 0.17647065222263336, 0.22498701512813568, 0.2937440276145935, 0.29627105593681335, 0.4561263918876648, 0.2063801884651184, 0.1252652406692505, 0.2929028570652008, 0.10891766846179962, 0.11386694014072418, 0.1433727741241455, 0.05652458593249321, 0.4678439795970917, 0.32619333267211914, 0.33166176080703735, 0.25501662492752075, 0.237491175532341, 0.3637356162071228, 0.32955211…	[0.16364425420761108, 0.06507925689220428, 0.07695777714252472, 0.5347845554351807, 0.46396878361701965, 0.11686287820339203, 0.12717148661613464, 0.10295771807432175, 0.22219130396842957, 0.18362009525299072, 0.056895285844802856, 0.046027421951293945, 0.0765332356095314, 0.6967482566833496, 0.11743693053722382, 0.41248467564582825, 0.5696448087692261, 0.07328979671001434, 0.07265359163284302, 0…	0
ENSG00000005020.13	human-mRNA	393	GGGCCCCGUCGGUCACCUUUUCAGCGCAGGUCCUUUCCCCGCACGCCCUGCGCUCCCUAACAUGCCCAACCCCAGCAGCACCUCCUCUCCCUACCCCCUCCCUGAGGAAAUUAGGAACCUGUUGGCAGAUGUUGAAACAUUUGUAGCAGAUAUACUGAAAGGAGAAAAUUUAUCCAAGAAAGCAAAGGAAAAGAGAGAAUCCCUUAUUAAGAAGAUAAAAGAUGUAAAGUCUAUCUAUCUUCAGGAAUUUCAAGACAAAGGUGAUGCAGAAGAUGGGGAAGAAUAUGAUGACCCUUUUGCUGGGCCUCCAGACACUAUUUCAUUAGCCUCAGAACGAUAUGAUAAAGACGAUGAAGCCCCCUCUGAUGGAGCCCAGUUUCCUCCAAUUGCAGC	nan nan nan 0.0811 0.0586 1.0 0.0843 nan nan 0.3959 nan nan nan 0.0628 0.117 0.1464 0.0722 nan nan nan nan 0.412 0.3406 nan 0.0488 nan 0.0457 0.087 nan nan nan 0.1593 0.5364 nan nan nan 0.167 0.0722 0.0942 0.1672 nan 0.8123 0.6109 1.0 nan 0.7056 0.0226 0.0244 nan nan 0.0487 nan 0.0313 nan 0.4335 0.1993 0.1437 nan 0.5651 0.7188 0.9464 0.7222 nan nan 0.1467 0.1051 0.1138 0.3874 0.5085 0.1612 0.077 …	nan nan nan 0.10693565400843882 0.07726793248945148 1.3185654008438819 0.11115506329113925 nan nan 0.5220200421940928 nan nan nan 0.08280590717299578 0.1542721518987342 0.1930379746835443 0.09520042194092827 nan nan nan nan 0.5432489451476793 0.4491033755274262 nan 0.06434599156118144 nan 0.0602584388185654 0.11471518987341772 nan nan nan 0.2100474683544304 0.7072784810126582 nan nan nan 0.220200…	[0.05081372335553169, 0.14921891689300537, 0.049249835312366486, 0.020570479333400726, 0.017466314136981964, 0.005876842886209488, 0.022481977939605713, 0.22158277034759521, 0.20714609324932098, 0.15779221057891846, 0.13407176733016968, 0.22747118771076202, 0.19254347681999207, 0.12771043181419373, 0.25060534477233887, 0.04545993357896805, 0.04658425971865654, 0.11818772554397583, 0.2112274765968…	[0.07040666788816452, 0.03242067992687225, 0.12085838615894318, 0.2454226315021515, 0.18556930124759674, 0.14800095558166504, 0.3696424067020416, 0.24752086400985718, 0.24003610014915466, 0.5465824604034424, 0.17994385957717896, 0.13559608161449432, 0.17993763089179993, 0.4210576117038727, 0.47153887152671814, 0.3662506341934204, 0.24175241589546204, 0.10375721752643585, 0.17208132147789001, 0.16…	0
ENSG00000005022.6	human-mRNA	608	GGGAGUUCUGUCCUUCUGGCGCGGUAACCUGGCCAAUGUCAUCAGAUACUUCCCCACCCAGGCUCUUAACUUCGCCUUCAAAGAUAAAUACAAGCAGAUCUUCCUGGGUGGUGUGGACAAGAGAACCCAGUUUUGGCGCUACUUUGCAGGGAAUCUGGCAUCGGGUGGUGCCGCAGGGGCCACAUCCCUGUGUUUUGUGUACCCUCUUGAUUUUGCCCGUACCCGUCUAGCAGCUGAUGUGGGUAAAGCUGGAGCUGAAAGGGAAUUCCGAGGCCUCGGUGACUGCCUGGUUAAGAUCUACAAAUCUGAUGGGAUUAAGGGCCUGUACCAAGGCUUUAACGUGUCUGUGCAGGGUAUUAUCAUCUACCGAGCCGCCUACUUCGGUAUCUAUGACACUGC…	nan nan nan 0.1647 nan nan nan 0.1133 nan nan nan 0.48 0.1343 nan nan 0.4109 nan nan nan 1.0 nan 0.4323 nan nan nan 0.5072 0.7523 0.6562 0.2097 nan nan nan 0.2388 0.1821 0.2315 0.2871 nan nan nan 0.375 0.4104 nan 0.2413 0.1669 nan 0.2632 nan 0.2899 0.2874 nan nan 0.1022 0.0536 0.0222 0.0324 0.0761 0.0904 0.0682 0.0319 0.1417 nan nan 1.0 nan 0.4208 nan nan 0.4934 0.6786 0.7012 nan nan 0.3946 nan 0…	nan nan nan 0.21716772151898736 nan nan nan 0.14939345991561181 nan nan nan 0.6329113924050633 0.17708333333333334 nan nan 0.541798523206751 nan nan nan 1.3185654008438819 nan 0.5700158227848102 nan nan nan 0.6687763713080169 0.9919567510548524 0.8652426160337553 0.27650316455696206 nan nan nan 0.314873417721519 0.24011075949367092 0.3052478902953587 0.37856012658227856 nan nan nan 0.494462025316…	[0.17851729691028595, 0.2313246876001358, 0.07552358508110046, 0.38545241951942444, 0.15483832359313965, 0.4782058000564575, 0.2687530219554901, 0.17027133703231812, 0.2977946996688843, 0.44891810417175293, 0.2683596611022949, 0.07115888595581055, 0.048539891839027405, 0.34555336833000183, 0.47345125675201416, 0.2387283891439438, 0.26400601863861084, 0.24381855130195618, 0.26848047971725464, 0.24…	[0.10813503712415695, 0.05781063437461853, 0.056936115026474, 0.7949712872505188, 0.06989343464374542, 0.10092432796955109, 0.07411061227321625, 0.35285747051239014, 0.10755027830600739, 0.06969450414180756, 0.14632496237754822, 0.27592846751213074, 0.2758663296699524, 0.12584619224071503, 0.12401755154132843, 0.45165151357650757, 0.1398201286792755, 0.0714142844080925, 0.12186730653047562, 0.495…	0
ENSG00000005073.6	human-mRNA	799	GGGCAAAGAGAAGCGCCUGCAACUGUCCCGCAUGCUCAACCUCACUGAUCGUCAAGUCAAAAUCUGGUUUCAGAACAGGAGAAUGAAGGAAAAAAAAAUUAACAGAGACCGUUUACAGUACUACUCAGCAAAUCCACUCCUCUAAGACUCCAGCGGCUGGAAUUGGGUGGGGGGCUUCAUACACAUGAGAUAAUAUGCAGAUUUUGCCCUUGACAAAGUCAAGCCACAUGGUGACUUUUGAAAAGAGGUGUGCAAGAGAGGGAUGCAUGGAGAUAGCCCCACAGGAGGUGGUCUGGGACUCUCUUGAUUAAGAUCUCAGUGGUUAAGAUUCCUAAUAAUCAUUGGAUUCUGAGAGCUGUGCAUCAGCUAGAAUGACAGGUUUGGGACCCCUGGUGGUUC…	nan nan nan 0.1925 0.3727 0.434 0.5853 nan 0.8044 nan 0.5321 0.3986 nan 0.3453 nan 0.1204 0.0495 nan nan 0.26 0.4626 0.588 0.7685 nan nan nan 0.0625 0.084 0.1573 nan 0.2595 0.2493 nan nan 0.0596 nan 0.2376 0.6204 0.4752 0.2618 0.0592 nan 0.1405 0.6279 0.3415 nan nan 0.4595 nan 0.4809 nan nan 0.2734 0.3608 0.345 nan nan 0.1949 0.4267 0.3128 0.3483 0.3571 nan 0.1045 nan nan nan nan nan nan 0.2022 0…	nan nan nan 0.25382383966244726 0.49142932489451474 0.5722573839662447 0.7717563291139241 nan 1.0606540084388185 nan 0.7016086497890296 0.5255801687763714 nan 0.45530063291139244 nan 0.15875527426160338 0.06526898734177215 nan nan 0.3428270042194093 0.6099683544303798 0.7753164556962026 1.0133175105485233 nan nan nan 0.08241033755274262 0.11075949367088608 0.20741033755274263 nan 0.34216772151898…	[0.14453601837158203, 0.10542892664670944, 0.06637069582939148, 0.19132038950920105, 0.19124025106430054, 0.522788405418396, 0.09752598404884338, 0.2716865837574005, 0.10539809614419937, 0.26409900188446045, 0.41664761304855347, 0.44674405455589294, 0.32881850004196167, 0.2732200622558594, 0.30602458119392395, 0.19459682703018188, 0.13659733533859253, 0.19123099744319916, 0.24616408348083496, 0.2…	[0.10623280704021454, 0.04783931374549866, 0.10395942628383636, 0.4431741535663605, 0.4927184283733368, 0.619749903678894, 0.688240647315979, 0.05334673821926117, 0.9009494781494141, 0.07748609036207199, 0.8115492463111877, 0.88068687915802, 0.09835696965456009, 0.7385134696960449, 0.21826165914535522, 0.3629639744758606, 0.195466548204422, 0.10703764110803604, 0.16022497415542603, 0.627366900444…	0
ENSG00000005243.10	human-mRNA	328	GGGAACGUGGAGAAGCGCUGGUUGCUGGAGAACAUGGACGGAGCCUUCUUGGUGCUGGACGAGAUUGUGGAUGGCGGUGUGAUUCUGGAGAGUGACCCCCAGCAAGUGAUCCAGAAGGUGAAUUUUAGGGCAGAUGAUGGCGGCUUGACUGAACAGAGUGUGGCCCAGGUUCUUCAGUCUGCCAAGGAACAAAUUAAAUGGUCGUUAUUGAAAUGAAGGCUGUGGAUUCAAGGCUCCCUGCCCCCCAGAUCAUUUCCCCAAUCCUGGCAAAAGCCCAAAGAUCCCAGGGUCAGGAGAGACCCCUCUGUAUCCCCAGGUCCCUCCCAGA	nan nan nan 0.368 0.6189 0.7436 nan nan nan nan 0.4008 nan 0.7274 0.4928 nan 0.6626 nan 0.3552 nan nan nan nan nan nan 0.1204 nan nan nan 0.3193 nan 0.4915 0.4434 0.5045 0.6673 nan nan nan 0.5759 0.5553 nan nan 1.0 nan 0.1215 0.0549 nan nan 0.1157 nan nan nan nan nan nan 0.1442 nan nan nan 0.8693 0.6759 nan 0.747 nan 0.8594 nan nan nan nan nan nan 0.572 nan nan nan 0.4379 nan nan nan nan nan nan …	nan nan nan 0.48523206751054854 0.8160601265822786 0.9804852320675106 nan nan nan nan 0.5284810126582279 nan 0.9591244725738398 0.649789029535865 nan 0.8736814345991561 nan 0.4683544303797469 nan nan nan nan nan nan 0.15875527426160338 nan nan nan 0.42101793248945146 nan 0.648074894514768 0.5846518987341772 0.6652162447257384 0.8798786919831224 nan nan nan 0.7593618143459916 0.7321993670886077 na…	[0.19603011012077332, 0.1854829490184784, 0.16393184661865234, 0.22983646392822266, 0.17535455524921417, 0.2719755172729492, 0.35257279872894287, 0.4468684494495392, 0.20059816539287567, 0.24614639580249786, 0.4440244734287262, 0.17999523878097534, 0.4439706802368164, 0.2665785551071167, 0.29307821393013, 0.3201342821121216, 0.0553281344473362, 0.3785797953605652, 0.23749613761901855, 0.206464976…	[0.18743331730365753, 0.14014792442321777, 0.1348244696855545, 0.42455703020095825, 0.47521406412124634, 0.6550095081329346, 0.19657140970230103, 0.18129880726337433, 0.10768170654773712, 0.07462170720100403, 0.6687874794006348, 0.09594448655843735, 0.6840585470199585, 0.6410048007965088, 0.1368209421634674, 0.7679254412651062, 0.21107658743858337, 0.40686726570129395, 0.11762330681085587, 0.0895…	0
ENSG00000005812.11	human-mRNA	832	GGGCGGGCUCAUGCUUCACAAGUUUGCCGCAACUGGAACCAGGUAUUUCACAUGCCUGACUUGUGGAGAUGUUUUGAAUUUGAACUGAAUCAGCCAGCUACAUCUUAUUUGAAAGCUACCCAUCCAGAGCUGAUCAAACAGAUUAUUAAAAGACAUUCAAACCAUCUACAAUAUGUCAGCUUCAAGGUGGACAGCAGCAAGGAAUCAGCUGAAGCAGCUUGUGAUAUACUAUCGCAACUUGUGAAUUGCUCUUUAAAAACACUUGGACUUAUUUCAACUGCUCGACCAAGCUUUAUGGAUUUACCAAAGUCUCACUUUAUCUCUGCACUGACAGUUGUGUUCGUAAACUCCAAAUCCCUGUCUUCGCUUAAGAUAGAUGAUACUCCAGUAGAUGAUCCA…	nan nan nan 0.1376 nan nan nan 0.4874 nan 0.4383 0.1964 nan nan 0.1155 nan nan 0.0336 0.0812 0.0404 0.076 0.0759 nan nan nan nan nan 0.1748 0.3264 nan 0.6409 0.6106 0.739 0.8339 nan nan nan 0.585 0.7652 1.0 0.2104 0.1937 nan nan nan 0.2085 nan nan nan 0.6386 0.4964 0.7249 0.457 nan nan 0.08 0.1136 nan nan 0.4308 0.0542 nan nan nan nan nan nan 0.1252 nan 0.267 nan nan nan nan nan nan nan 0.456 0.3…	nan nan nan 0.18143459915611815 nan nan nan 0.642668776371308 nan 0.5779272151898734 0.25896624472573837 nan nan 0.15229430379746836 nan nan 0.04430379746835443 0.1070675105485232 0.05327004219409283 0.10021097046413502 0.10007911392405063 nan nan nan nan nan 0.23048523206751056 0.4303797468354431 nan 0.845068565400844 0.8051160337552743 0.9744198312236287 1.099551687763713 nan nan nan 0.77136075…	[0.1714741289615631, 0.1712343990802765, 0.1356230527162552, 0.22672517597675323, 0.12613293528556824, 0.18595975637435913, 0.1316072940826416, 0.17643141746520996, 0.11957153677940369, 0.1484801173210144, 0.37071385979652405, 0.5121904611587524, 0.3280920684337616, 0.31639376282691956, 0.40979069471359253, 0.3705131411552429, 0.1616446077823639, 0.15998516976833344, 0.12585870921611786, 0.191756…	[0.14327472448349, 0.07318474352359772, 0.2276512086391449, 0.3937932252883911, 0.23411574959754944, 0.09501433372497559, 0.21131670475006104, 0.4935588538646698, 0.10767828673124313, 0.46405208110809326, 0.6057961583137512, 0.16253264248371124, 0.2037251740694046, 0.7500234842300415, 0.11636514216661453, 0.1311715543270111, 0.49536776542663574, 0.5236578583717346, 0.5541307926177979, 0.628589510…	0
ENSG00000006118.15	human-mRNA	432	GGGUCUGAUCACACUGUGGCCCCAGCUGAGCUCUACGACCGCCGUGACCUGGGACUGUCCGUCUCAGCCGAGGAGCCUGGUGCCAUCCUGCCAGCUGAGGAGCAGGGUGCCCAGCUCGGGGUGGUGGUGAGUGGGGCAGGCGCCGAGGGGCUGCCGCUGCAUGUGGCUCUGCACCCGCCCGAGCCCUGCCGCCGGGGCCGCCACCGUGUGCCUCUGGCCUCUGGCACCGCCUGGCUGGGGCUGCCCCCUGCCUCCACUCCAGCCCCUGCUCUCCCAUCCAGCCCUGCUUGGAGCCCACCAGCCACAGAAGCCACCAUGGGUGGUAAACGGCAGGUGGCAGGCAGUGUCGGGGGCAACACAGGUGUGAGGGGCAAGUUUGAGCGGGCAGAGGAGGAGGCC…	nan nan nan nan 0.1561 nan nan 0.6701 nan 0.2867 0.2626 0.2726 0.3624 0.2524 nan nan nan nan nan 0.0375 0.0467 0.0699 0.0724 0.3124 nan 0.217 nan nan 0.6063 nan 0.2762 nan 0.2085 nan 0.4689 0.4271 nan 0.3366 0.233 0.1783 nan 0.1516 0.1119 nan nan nan 0.7175 0.6911 0.1108 nan nan nan nan 0.3862 0.1226 nan nan nan 0.697 0.4127 nan nan 0.0425 nan 0.0286 0.1728 nan 0.4995 0.184 nan 0.8876 nan nan 0.4…	nan nan nan nan 0.20582805907172996 nan nan 0.8835706751054853 nan 0.378032700421941 0.3462552742616034 0.3594409282700422 0.47784810126582283 0.3328059071729958 nan nan nan nan nan 0.04944620253164557 0.06157700421940929 0.09216772151898735 0.09546413502109706 0.41191983122362874 nan 0.28612869198312235 nan nan 0.7994462025316456 nan 0.3641877637130802 nan 0.2749208860759494 nan 0.61827531645569…	[0.208276629447937, 0.07723551243543625, 0.1439947485923767, 0.3405345678329468, 0.26386794447898865, 0.3160632848739624, 0.5415635704994202, 0.5528361201286316, 0.5249515771865845, 0.2635652422904968, 0.11707346141338348, 0.056053489446640015, 0.11827895045280457, 0.29460030794143677, 0.38675618171691895, 0.23291626572608948, 0.36947929859161377, 0.27402380108833313, 0.10521945357322693, 0.04248…	[0.06986996531486511, 0.05111145228147507, 0.11498332023620605, 0.11068697273731232, 0.27966633439064026, 0.16763341426849365, 0.14259354770183563, 0.8511437177658081, 0.15841063857078552, 0.4246957302093506, 0.4691087305545807, 0.41665416955947876, 0.4557877779006958, 0.41499751806259155, 0.1630759835243225, 0.12923206388950348, 0.12813504040241241, 0.08279996365308762, 0.06424635648727417, 0.17…	0
ENSG00000007520.4	human-mRNA	780	GGGAGACAGCUGGUGGCGCAGUCUGGGGUCGCCGUCAUCGACUGCUCCUGGGCCAGGCUGGACGAGACACCGUUUGGGAAGAUGCGAGGGAGCCACUUGCGCCUGUUGCCCUACCUGGUGGCCGCCAACCCCGUGAACUAUGGCCGGCCCUACAGACUUUCCUGCGUGGAAGCGUUUGCUGCCACCUUCUGCAUCGUAGGCUUUCCAGACCUUGCUGUCAUUUUGCUGCGGAAGUUUAAAUGGGGCAAGGGCUUCUUGGACCUGAACCGCCAGCUCCUGGACAAGUACGCGGCCUGCGGCAGCCCGGAGGAGGUGCUGCAGGCGGAGCAGGAGUUCUUGGCCAAUGCCAAGGAGAGCCCCCAGGAGGAGGAGAUCGAUCCCUUCGAUGUGGAUUCAGGG…	nan nan nan 0.2554 nan 0.5782 0.2766 0.1402 nan 0.1589 nan nan nan nan nan nan 0.1752 nan 0.4033 0.4622 nan nan 0.2754 nan nan nan nan nan nan 0.2867 nan 0.5395 0.1165 nan nan 0.1594 0.3054 nan 0.2164 nan 0.5558 0.1008 nan nan 0.0482 nan 0.1105 0.0603 nan nan nan nan 0.2294 0.1865 0.3159 nan nan 0.1067 nan nan nan 0.5767 0.8221 nan 0.7619 nan 0.708 0.4041 0.6716 0.2526 0.1639 nan nan nan nan nan …	nan nan nan 0.33676160337552746 nan 0.7623945147679326 0.3647151898734178 0.18486286919831224 nan 0.20952004219409284 nan nan nan nan nan nan 0.2310126582278481 nan 0.5317774261603375 0.6094409282700423 nan nan 0.36313291139240506 nan nan nan nan nan nan 0.378032700421941 nan 0.7113660337552743 0.15361286919831224 nan nan 0.21017932489451477 0.40268987341772156 nan 0.2853375527426161 nan 0.732858…	[0.17257782816886902, 0.24126866459846497, 0.11159715801477432, 0.44299066066741943, 0.2099369764328003, 0.24054168164730072, 0.12854985892772675, 0.20350366830825806, 0.18391409516334534, 0.17303743958473206, 0.33951085805892944, 0.28024154901504517, 0.33950719237327576, 0.35985738039016724, 0.3398693799972534, 0.2258601039648056, 0.23027779161930084, 0.05357754975557327, 0.20399177074432373, 0.…	[0.12580019235610962, 0.07777316123247147, 0.047556072473526, 0.7177855968475342, 0.10114392638206482, 0.6564468741416931, 0.41673314571380615, 0.49908751249313354, 0.13068772852420807, 0.27561303973197937, 0.08631917089223862, 0.131026953458786, 0.21449564397335052, 0.10973575711250305, 0.1680566817522049, 0.10701198130846024, 0.3759835660457611, 0.2671624720096588, 0.3778555989265442, 0.4905312…	0
ENSG00000008018.9	human-mRNA	647	GGGCUCCUGGCAGAGACUUGGGGAUGGAACCGCACAGAGCCGCGGGCCCUUUGCAGCUGCGAUUUUCGCCCUACGUUUUCAACGGAGGUACUAUACUGGCAAUUGCUGGAGAAGAUUUUGCAAUUGUUGCUUCUGAUACUCGAUUGAGUGAAGGGUUUUCAAUUCAUACGCGGGAUAGCCCCAAAUGUUACAAAUUAACAGACAAAACAGUCAUUGGAUGCAGCGGUUUUCAUGGAGACUGUCUUACGCUGACAAAGAUUAUUGAAGCAAGACUAAAGAUGUAUAAGCAUUCCAAUAAUAAGGCCAUGACUACGGGGGCAAUUGCUGCAAUGCUGUCUACAAUCCUGUAUUCAAGGCGCUUCUUUCCAUACUAUGUUUACAACAUCAUCGGUGGACUUG…	nan nan nan 0.0704 nan 0.0637 0.0933 nan nan nan 0.4247 0.452 nan 0.4702 nan 0.5143 0.457 nan nan nan nan nan nan 0.4234 nan nan nan 0.5648 0.6507 0.3713 0.0615 nan 0.0808 0.5299 0.8399 0.6293 nan 0.7041 nan 0.1719 0.1277 nan 0.9781 nan nan nan 0.078 0.1167 0.0543 nan nan nan nan 0.202 0.264 nan 0.3297 nan nan 0.1298 nan 0.2939 nan nan nan nan 0.2274 nan 0.3162 0.046 0.0226 nan 0.3675 0.1709 nan …	nan nan nan 0.09282700421940929 nan 0.08399261603375528 0.12302215189873418 nan nan nan 0.5599947257383967 0.5959915611814346 nan 0.6199894514767933 nan 0.6781381856540084 0.6025843881856541 nan nan nan nan nan nan 0.5582805907172996 nan nan nan 0.7447257383966245 0.8579905063291139 0.48958333333333337 0.08109177215189874 nan 0.10654008438818566 0.6987078059071731 1.1074630801687764 0.82977320675…	[0.10228697955608368, 0.14114759862422943, 0.09637130796909332, 0.1129932552576065, 0.12380744516849518, 0.0992865338921547, 0.08996027708053589, 0.24203607439994812, 0.29651373624801636, 0.11267980933189392, 0.18446525931358337, 0.343117892742157, 0.16597306728363037, 0.0673871859908104, 0.16483092308044434, 0.3740558326244354, 0.20979124307632446, 0.41324254870414734, 0.47811129689216614, 0.098…	[0.08913791179656982, 0.05399259924888611, 0.11615972220897675, 0.35206156969070435, 0.08829011768102646, 0.20458805561065674, 0.27587610483169556, 0.13934727013111115, 0.09612248837947845, 0.1960620880126953, 0.47081077098846436, 0.5362047553062439, 0.07686889916658401, 0.9997734427452087, 0.053764715790748596, 0.6245646476745605, 0.5882202982902527, 0.13123327493667603, 0.14995339512825012, 0.1…	0
ENSG00000008056.14	human-mRNA	623	GGGAGCCAGGACGAGGUGAAAGCUGAGACCAUCCGCAGCCUGAGGAAGUCUUUCGCCAGCCUCUUCUCCGACUGAUACCCCACUCUGAGAACCCCAAAAUCCCUGGGCAACCCUUCUCUGGGCCCUGAAUCCAUUUCUCACUUUUGGAGUCUCCAAAUCCCUUGAGAACCCAUCUCCCGGUUCUCCAAGAUUCCACCUCUCAUUCCUCAAGAUCCCCGAGUACCUUGAGAAACCUGACUCCUCCUGGCCCUAAAUCCGGUUCUCACAUGUGGAAUCCCCAAGUCCUUUUAGAACCCCACUCGUGGUCACUUCAGGAUCUACUUCUGUUUUAGAACCUCCACAUUCCUGAAGACCUCCGCCCCUGGUUUCCCCAGAGGGCGUUUUCCUUCCUGGAAGUGC…	nan nan nan 0.3596 nan 0.3594 0.3063 0.1444 nan nan 0.6239 1.0 nan 0.2237 nan nan nan nan 0.6198 0.6273 0.8782 nan 0.256 nan nan 0.1903 nan 0.2446 0.202 0.1764 0.4186 nan 0.0556 0.0417 nan 0.1201 0.2808 nan 0.077 0.086 nan nan 1.0 nan nan 0.6751 1.0 nan nan 0.0871 nan nan nan 1.0 nan 0.1691 0.215 1.0 nan 0.1822 0.0486 nan 0.0926 nan nan 0.2366 nan 0.3204 0.2732 nan 0.7773 0.5285 nan nan 0.6702 na…	nan nan nan 0.4741561181434599 nan 0.47389240506329117 0.40387658227848106 0.19040084388185655 nan nan 0.8226529535864979 1.3185654008438819 nan 0.2949630801687764 nan nan nan nan 0.817246835443038 0.8271360759493671 1.1579641350210972 nan 0.3375527426160338 nan nan 0.25092299578059074 nan 0.3225210970464135 0.2663502109704642 0.23259493670886078 0.551951476793249 nan 0.07331223628691982 0.054984…	[0.19526737928390503, 0.20682936906814575, 0.11106806993484497, 0.2704731822013855, 0.21667985618114471, 0.19061240553855896, 0.09777511656284332, 0.14581558108329773, 0.16153883934020996, 0.1426914781332016, 0.2201617956161499, 0.3732849359512329, 0.22577470541000366, 0.2548154294490814, 0.1786946952342987, 0.13539715111255646, 0.4592522978782654, 0.3723335266113281, 0.43901535868644714, 0.24711…	[0.1528601497411728, 0.0983274057507515, 0.0848340317606926, 0.6762880682945251, 0.20561213791370392, 0.5736101865768433, 0.46111607551574707, 0.47728586196899414, 0.11449554562568665, 0.13476243615150452, 0.6750146746635437, 1.0023053884506226, 0.1875658631324768, 0.6047143936157227, 0.10513628274202347, 0.18633678555488586, 0.2946785092353821, 0.23537662625312805, 0.6639867424964905, 0.51243484…	0
ENSG00000008196.13	human-mRNA	784	GGGCUCCAUCUCACCUCACCCGUCUCCCAACCACCCUUUUCCAUGUUACCCUCCCUUCCUCACAUUGUUACGGGAAUCUUCUGGGAUGAAAAUGAGUGUGGUUGGCCCUUUUGCGUUGUUUCAGUCCUCUCGGUACCUCCCCGCCCAGCCCUGCGAUCUUAACUCACCGGGCCCGGCUCCCCGGCCGCUUGCAUAAUUAGGGAGGGCGAGGGCGGGGCGGGAGGCCUGUGGAGACCAGGCGGAGGCUGCAAUUUUUGGUGCCGGCCGGCAGAGCAGGUUCUGGCGGCUGAGGAAAAUCCGGACCAAUAAGUUGAUUCAAACAUCAUCAGUUCCUUUCAGAAAUGUUACUAGCUCCCAGCCUUGCCAGCAUCUGCAUAGAGAGAAUCUCACAUUUAUUAU…	nan nan nan nan nan nan nan nan nan nan nan nan nan nan nan nan nan nan nan nan nan nan nan nan nan nan nan nan nan nan nan nan nan nan nan nan nan nan nan nan nan nan nan nan nan nan nan nan nan nan nan nan nan nan nan nan nan nan nan nan nan nan nan nan nan nan nan nan nan nan nan nan nan nan nan nan nan nan nan nan nan nan nan nan nan nan nan nan nan nan nan nan nan nan 0.6016 nan nan nan nan …	nan nan nan nan nan nan nan nan nan nan nan nan nan nan nan nan nan nan nan nan nan nan nan nan nan nan nan nan nan nan nan nan nan nan nan nan nan nan nan nan nan nan nan nan nan nan nan nan nan nan nan nan nan nan nan nan nan nan nan nan nan nan nan nan nan nan nan nan nan nan nan nan nan nan nan nan nan nan nan nan nan nan nan nan nan nan nan nan nan nan nan nan nan nan 0.7932489451476794 nan …	[0.08732294291257858, 0.096685990691185, 0.07088840007781982, 0.16335952281951904, 0.12395229935646057, 0.08980193734169006, 0.027225058525800705, 0.4872816801071167, 0.2668304741382599, 0.14514020085334778, 0.1787882149219513, 0.1304122805595398, 0.3941826820373535, 0.0322585366666317, 0.025734998285770416, 0.1007779985666275, 0.1029016375541687, 0.40431854128837585, 0.01955360174179077, 0.02925…	[0.10286028683185577, 0.04223257303237915, 0.10723631083965302, 0.4644289016723633, 0.09842037409543991, 0.18675518035888672, 0.2445746809244156, 0.5020638704299927, 0.17154046893119812, 0.3301946520805359, 0.1430407166481018, 0.6149660348892212, 0.7308904528617859, 0.2656903564929962, 0.15830469131469727, 0.10585684329271317, 0.679867684841156, 0.9588022232055664, 0.2342207133769989, 0.094936847…	0
ENSG00000008438.5	human-mRNA	392	GGGGACACUGGGCUGGUGCGACGUGGGCUACAACUUCCUGAUUGGAGAAGACGGGCUCGUAUACGAGGGCCGUGGCUGGAACUUCACGGGUGCCCACUCAGGUCACUUAUGGAACCCCAUGUCCAUUGGCAUCAGCUUCAUGGGCAACUACAUGGAUCGGGUGCCCACACCCCAGGCCAUCCGGGCAGCCCAGGGUCUACUGGCCUGCGGUGUGGCUCAGGGAGCCCUGAGGUCCAACUAUGUGCUCAAAGGACACCGGGAUGUGCAGCGUACACUCUCUCCAGGCAACCAGCUCUACCACCUCAUCCAGAAUUGGCCACACUACCGCUCCCCCUGAGGCCCUGCUGAUCCGCACCCCAUUCCUCCCCUCCCAUGGCCAAAAACCCCACUGU	nan nan nan nan 0.6904 0.8907 0.5698 0.4785 nan nan nan nan 0.3495 nan nan nan nan nan 0.3025 nan 0.5347 0.6677 nan nan nan nan nan 0.2574 nan 0.8118 0.7651 0.7824 0.9538 0.7636 nan nan 0.0835 0.0737 nan nan 0.6632 nan nan nan nan 0.3579 nan 0.6396 0.5011 nan 0.6704 0.483 nan nan nan 0.0551 nan 0.0917 nan nan 0.7478 nan 0.9739 0.6155 nan 0.5048 nan nan nan 0.1127 0.076 nan nan nan nan 0.2002 nan …	nan nan nan nan 0.9103375527426161 1.1744462025316458 0.7513185654008439 0.6309335443037974 nan nan nan nan 0.4608386075949367 nan nan nan nan nan 0.3988660337552743 nan 0.7050369198312236 0.8804061181434599 nan nan nan nan nan 0.3393987341772152 nan 1.0704113924050633 1.008834388185654 1.0316455696202531 1.2576476793248945 1.006856540084388 nan nan 0.11010021097046414 0.0971782700421941 nan nan …	[0.16217708587646484, 0.1503717303276062, 0.11138899624347687, 0.13787144422531128, 0.2909354567527771, 0.23719626665115356, 0.17331281304359436, 0.5360153317451477, 0.3941166400909424, 0.0828949511051178, 0.0975741297006607, 0.05568677932024002, 0.1921515315771103, 0.24043616652488708, 0.13480161130428314, 0.1844426989555359, 0.2719043493270874, 0.3061032295227051, 0.22161298990249634, 0.1994529…	[0.12335860729217529, 0.06452644616365433, 0.07856469601392746, 0.07844674587249756, 0.7418615221977234, 0.9011102914810181, 0.6194406151771545, 0.7849875092506409, 0.18292373418807983, 0.05477927625179291, 0.061034753918647766, 0.13474158942699432, 0.3591557443141937, 0.14925314486026764, 0.09999096393585205, 0.13752833008766174, 0.1508978307247162, 0.21537354588508606, 0.5954641103744507, 0.110…	0
ENSG00000009694.14	human-mRNA	892	GGGGUGUUUUGGCGUGUGGUGGCUGGGUUCUGUCUACCAUGCUUCCCUGUGGGUGUGGUAACCAGACUGUAUAGCCGCUAUUUGCUCGUGUGUACAUGAUACCAAAGCAGCUGGCCAGCGUGACCUCUCUCACACGACCUGUUUUGACUCAAUUUUUUACUAAAAGUUGUUCAGCUGUAUUGGUAUCAUGUAAACAUAGCUUUUAUUAACCUGGGUAGGAAUUUCUCAUUUAUAUAUAGGAUGUGUUUUGGUCAUAGUUUCACAUUAGUGAUUCAGUAUCUAUACACUGACCCAAUGGUUUUGUGCACAUGAACGGUAAUUUACUUAAAAGUAUGAUUCUGGUACAAAAACAAACAAAGGCUUUAGCAGGCAUACGUGUCUGGGAUGCCGAUACAUACA…	nan nan nan nan nan nan nan nan nan nan nan nan 0.2436 nan nan nan nan nan nan nan nan nan 0.038 nan nan nan nan nan nan 0.0734 nan nan nan 0.2778 nan 0.1135 0.0447 0.034 0.0433 nan nan 0.0555 nan nan 0.1158 0.3477 0.581 nan nan nan nan nan nan nan nan nan nan nan nan 0.1253 0.6727 0.4586 0.0548 0.0789 nan 0.2619 0.3281 nan nan nan 0.622 nan 0.3868 nan 0.1295 0.0956 nan 0.2547 nan 0.5064 nan nan …	nan nan nan nan nan nan nan nan nan nan nan nan 0.32120253164556967 nan nan nan nan nan nan nan nan nan 0.05010548523206751 nan nan nan nan nan nan 0.09678270042194094 nan nan nan 0.3662974683544304 nan 0.1496571729957806 0.05893987341772152 0.04483122362869199 0.05709388185654009 nan nan 0.07318037974683544 nan nan 0.15268987341772153 0.4584651898734178 0.7660864978902954 nan nan nan nan nan nan…	[0.0907825231552124, 0.09194964170455933, 0.10087640583515167, 0.0950247272849083, 0.23114654421806335, 0.43271827697753906, 0.2102748304605484, 0.5047594308853149, 0.29576560854911804, 0.34146690368652344, 0.19915251433849335, 0.02536683902144432, 0.26520007848739624, 0.10662807524204254, 0.3764493465423584, 0.15749749541282654, 0.24644355475902557, 0.2296508550643921, 0.2648623287677765, 0.1915…	[0.19364520907402039, 0.05355735123157501, 0.0788043960928917, 0.23951205611228943, 0.09255630522966385, 0.1381218284368515, 0.0687229111790657, 0.09638318419456482, 0.10106049478054047, 0.08235782384872437, 0.07037303596735, 0.13681882619857788, 0.7543217539787292, 0.3202715516090393, 0.13184091448783875, 0.25443875789642334, 0.177261620759964, 0.17255058884620667, 0.22849567234516144, 0.1090871…	0
ENSG00000010319.7	human-mRNA	410	GGGGACGGACGAGCGAGUCUUGCACACGGAGCGGGGGCUGCUGUUCCGCAGGCUUAGCCGUUUCGAUGCGGGCACCUACACCUGCACCACUCUGGAGCAUGGCUUCUCCCAGACUGUGGUCCGCCUGGCUCUGGUGGUGAUUGUGGCCUCACAGCUGGACAACCUGUUCCCUCCGGAGCCAAAGCCAGAGGAGCCCCCAGCCCGGGGAGGCCUGGCUUCCACCCCACCCAAGGCCUGGUACAAGGACAUCCUGCAGCUCAUUGGCUUCGCCAACCUGCCCCGGGUGGAUGAGUACUGUGAGCGCGUGUGGUGCAGGGGCACCACGGAAUGCUCAGGCUGCUUCCGGAGCCGGAGCCGGGGCAAGCAGGCCAGGGGCAAGAGCUGGGCAGGGCUGGAGCU…	nan nan nan nan 0.4531 0.3633 nan nan 0.317 0.3672 nan 0.4731 nan 0.3887 nan 0.4578 nan nan 0.0972 nan nan nan 0.1876 0.7035 0.8294 1.0 0.595 nan nan 0.197 nan 0.1342 nan nan nan nan nan 0.2879 nan nan 0.3343 nan nan nan nan 0.3054 0.2163 nan 0.1501 0.308 nan nan 0.1266 nan nan 0.5691 nan 0.0756 0.0638 nan nan nan nan 0.4753 nan 1.0 nan nan 0.1004 nan nan nan 0.3689 0.4873 0.7733 0.2779 nan 0.820…	nan nan nan nan 0.5974419831223629 0.47903481012658233 nan nan 0.4179852320675106 0.4841772151898735 nan 0.6238132911392406 nan 0.5125263713080169 nan 0.6036392405063291 nan nan 0.1281645569620253 nan nan nan 0.24736286919831224 0.927610759493671 1.0936181434599157 1.3185654008438819 0.7845464135021097 nan nan 0.25975738396624476 nan 0.17695147679324896 nan nan nan nan nan 0.3796149789029536 nan …	[0.18016228079795837, 0.18263942003250122, 0.15702694654464722, 0.18227475881576538, 0.18701255321502686, 0.17197051644325256, 0.16627240180969238, 0.15791428089141846, 0.17912310361862183, 0.20449665188789368, 0.17507949471473694, 0.20740452408790588, 0.3077486753463745, 0.3196493089199066, 0.20499783754348755, 0.20169393718242645, 0.2171214371919632, 0.23416368663311005, 0.1844082772731781, 0.2…	[0.14785918593406677, 0.09180158376693726, 0.10059496015310287, 0.09717503190040588, 0.5319279432296753, 0.37100598216056824, 0.08436662703752518, 0.036432474851608276, 0.5596279501914978, 0.5734929442405701, 0.059319645166397095, 0.6152073740959167, 0.08707992732524872, 0.5164530873298645, 0.07440796494483948, 0.6034742593765259, 0.09784911572933197, 0.12634938955307007, 0.20574845373630524, 0.1…	0
ENSG00000011260.14	human-mRNA	553	GGGUGGAGGAGGACAAACCGGCCGUGGAGCGGUGCUUGGAGGAGCUGGUCUUCGGCGACGUCGAGAACGACGAGGACGCGUUGCUGCGGCGUCUGCGAGGCCCGAGGGUUCAAGAACAUGAAGACUCGGGUGACUCAGAAGUGGAGAAUGAAGCAAAAGGUAAUUUUCCACCUCAAAAGAAGCCAGUUUGGGUGGAUGAAGAAGAUGAAGAUGAGGAAAUGGUUGACAUGAUGAACAAUCGGUUUCGGAAGGAUAUGAUGAAAAAUGCUAGUGAAAGUAAACUUUCGAAAGACAACCUUAAAAAGAGACUUAAAGAAGAAUUCCAACAUGCCAUGGGAGGAGUACCUGCCUGGGCAGAGACUACUAAGCGGAAAACAUCUUCAGAUGAUGAAAGUGAAG…	nan nan nan nan nan nan 0.2637 nan nan 0.2774 nan nan 0.4334 0.6426 0.5779 0.6318 0.795 0.5588 0.253 nan nan 0.2526 0.2339 nan nan nan nan 0.4133 nan 0.282 nan nan nan nan 0.3693 nan nan nan nan 0.4296 nan nan 0.5271 nan 0.0867 nan nan nan nan 0.0702 nan nan 0.1002 nan nan 0.3083 nan 0.2025 0.0525 nan nan 0.0485 nan 0.374 nan 0.3649 0.2227 0.0886 nan 0.4664 0.3381 nan 0.7054 nan nan 0.3776 1.0 na…	nan nan nan nan nan nan 0.34770569620253167 nan nan 0.3657700421940928 nan nan 0.5714662447257385 0.8473101265822784 0.7619989451476793 0.8330696202531647 1.0482594936708862 0.7368143459915611 0.33359704641350213 nan nan 0.33306962025316456 0.308412447257384 nan nan nan nan 0.5449630801687764 nan 0.37183544303797467 nan nan nan nan 0.4869462025316456 nan nan nan nan 0.5664556962025317 nan nan 0.6…	[0.24914538860321045, 0.20279231667518616, 0.2056376188993454, 0.523099958896637, 0.26699531078338623, 0.1838223934173584, 0.29749396443367004, 0.17570436000823975, 0.2347417026758194, 0.2616652548313141, 0.14301025867462158, 0.29023948311805725, 0.22019216418266296, 0.2803390622138977, 0.136600524187088, 0.6229186058044434, 0.24374593794345856, 0.10631728172302246, 0.05671945586800575, 0.2662331…	[0.0955151692032814, 0.0886429101228714, 0.21879157423973083, 0.24516820907592773, 0.18106627464294434, 0.07574720680713654, 0.6383882761001587, 0.08196069300174713, 0.09152639657258987, 0.7537530660629272, 0.09766009449958801, 0.07671701908111572, 0.7557842135429382, 0.9227285385131836, 0.5608636736869812, 0.9456830620765686, 0.7240632176399231, 0.46347776055336, 0.3021269142627716, 0.0871732383…	0
ENSG00000011426.11	human-mRNA	468	GGGGGCCAGUCCAGGAGGUCUUAGUGCUGUGCGAACCAGCAACUUCGCCCUUGUUGGAUCUUACACAUUAUCAUUGUCUUCAGUAGGAAAUACUAAGUUUGUUCUGGACAAGGUCCCCUUUUUAUCUUCUUUGGAAGGUCAUAUUUAUUUAAAAAUAAAAUGUCAAGUGAAUUCCAGUGUUGAAGAAAGAGGUUUUCUAACCAUAUUUGAAGAUGUUAGUGGUUUUGGUGCCUGGCAUCGAAGAUGGUGUGUUCUUUCUGGAAACUGUAUAUCUUAUUGGACUUAUCCAGAUGAUGAGAAACGCAAGAAUCCCAUAGGAAGGAUAAAUCUGGCUAAUUGUACCAGUCGUCAGAUAGAACCAGCCAACAGAGAAUUUUGUGCAAGACGCAACACUUUUGA…	nan nan nan nan nan nan nan nan nan nan nan nan nan nan nan nan nan nan nan nan nan nan nan nan nan nan nan nan nan nan nan nan nan nan nan nan nan nan nan nan nan nan nan nan nan nan nan nan nan nan nan nan nan nan nan nan nan 0.4307 nan 0.1242 nan nan 0.3195 0.0794 0.2 0.1712 0.3125 nan nan 0.285 nan 0.4872 0.5264 nan nan nan nan 0.2417 nan nan 0.3863 0.4371 nan nan 0.3644 nan nan 0.3687 0.4584…	nan nan nan nan nan nan nan nan nan nan nan nan nan nan nan nan nan nan nan nan nan nan nan nan nan nan nan nan nan nan nan nan nan nan nan nan nan nan nan nan nan nan nan nan nan nan nan nan nan nan nan nan nan nan nan nan nan 0.5679061181434599 nan 0.16376582278481014 nan nan 0.4212816455696203 0.10469409282700422 0.2637130801687764 0.22573839662447256 0.4120516877637131 nan nan 0.3757911392405…	[0.03374924510717392, 0.014994576573371887, 0.011969111859798431, 0.01830751821398735, 0.01674594357609749, 0.02614675834774971, 0.010004032403230667, 0.1126323789358139, 0.10324680060148239, 0.02870725654065609, 0.03135458007454872, 0.0038383565843105316, 0.08960813283920288, 0.07857966423034668, 0.10505879670381546, 0.13102033734321594, 0.22283202409744263, 0.2132556438446045, 0.189122557640075…	[0.1830991506576538, 0.0628957599401474, 0.04583238065242767, 0.05371340364217758, 0.11990945786237717, 0.23087075352668762, 0.23411042988300323, 0.9095823764801025, 0.053773894906044006, 0.10709036886692047, 0.15697255730628967, 0.19629310071468353, 0.31857210397720337, 0.047985754907131195, 0.08565426617860794, 0.4930170178413391, 0.08190010488033295, 0.10706145316362381, 0.18574313819408417, 0…	0
ENSG00000011590.14	human-mRNA	435	GGGGUCCUCAGCGCUCCCGGGACUUCUCGGCCAUGACCAAGCACCUGCGGACACACGGGGCCGCUCCGUACCGCUGCUCCCUGUGCGGGGCCGGCUGUCCCAGCCUGGCCUCCAUGCAGGCGCACAUGCGCGGUCACUCGCCCAGCCAACUCCCGCCCGGAUGGACCAUCCGCUCCACCUUCCUCUACUCCUCCUCGAGGCCGUCUCGGCCCUCGACCUCUCCCUGUUGUCCUUCUUCCUCCACCACCUGACGGGGUGUCGGUAGCGUCUUAGCCAAGAGUCCAAUUAAAGAACGAAAAGCGGGCCGGCUCGGCUUCUGACCUGGCACCGCUGCUACGGCGGCCUAGCAAAUUCCGCCCCAGAAGCGCCCCAGGAAGGGCGCCGAGUGCCCUCUCCUGG…	nan nan nan nan nan 0.1314 0.1299 nan 0.5522 0.5033 nan 0.26 nan 0.0894 nan 0.0986 0.0827 0.1235 nan nan nan 0.2549 0.2473 nan nan 0.1143 nan 0.637 nan nan 0.0959 0.4665 0.3607 nan nan 0.2858 0.1845 0.2335 0.618 1.0 nan 0.1547 0.3971 0.2944 0.1724 nan nan 0.1079 nan nan 0.8981 0.4836 0.4024 0.3938 0.2674 1.0 nan nan nan nan 0.2242 0.443 nan 0.1084 nan 0.451 0.4135 nan nan 0.7186 0.7557 0.5557 nan…	nan nan nan nan nan 0.17325949367088608 0.17128164556962025 nan 0.7281118143459916 0.6636339662447257 nan 0.3428270042194093 nan 0.11787974683544304 nan 0.13001054852320676 0.10904535864978902 0.16284282700421943 nan nan nan 0.33610232067510554 0.32608122362869196 nan nan 0.1507120253164557 nan 0.8399261603375529 nan nan 0.1264504219409283 0.615110759493671 0.47560654008438824 nan nan 0.376845991…	[0.09965752065181732, 0.13726386427879333, 0.042140763252973557, 0.15000714361667633, 0.45899468660354614, 0.12229916453361511, 0.15309308469295502, 0.3660323917865753, 0.1977483630180359, 0.39202165603637695, 0.25216537714004517, 0.18498386442661285, 0.22638481855392456, 0.3027820587158203, 0.3093138337135315, 0.0748332142829895, 0.1318143904209137, 0.039026740938425064, 0.0893431231379509, 0.10…	[0.08839772641658783, 0.03822927176952362, 0.042323604226112366, 0.08000855892896652, 0.1580761969089508, 0.2335847020149231, 0.26623401045799255, 0.11673953384160995, 0.40651917457580566, 0.6239899396896362, 0.0999978706240654, 0.5461021661758423, 0.14903981983661652, 0.5272497534751892, 0.08358758687973022, 0.23988699913024902, 0.23036256432533264, 0.33539265394210815, 0.12173336744308472, 0.05…	0
ENSG00000011677.13	human-mRNA	665	GGGACCAGAGCACUGUAUACCCCGUGAAGCAUCCAGGCACCCAAACCCCGGGGCUCCCCUUCGCGUAUUUCAGGAUUCUCCUUUUUACCCCUCUACCAAGCUGUGACCCUCAAUUCAUAUUUAUGAAUCUCUACGCAAAAAAUAACUACAGAAAAAUUACUUGUCCCUCCAAUAUUGCCCAGUAUAACCCCAUCAAAGCCAAACACUGCCAUUUGUCCAGUUGCUCAUCUUAGUCUGCCAAUCUCCCCUAGCUGAGGGCACUGCAUGUAUUUUAUUGCACUCUGCCCGCUGCAAAAAGAACAAGAGAUUCUACUCUCCAUAGUGGAAGCCUUGGCUGUUUGAGAGGCCCAGAACAAGGAGAAUUGUUGACUCCCAUCUAGAUCAGAUGACUCUAACUUA…	nan nan nan nan nan nan nan nan nan nan nan nan nan nan nan nan nan nan nan nan nan nan nan nan nan nan nan nan nan nan nan nan nan nan nan nan nan nan nan nan nan nan nan nan nan nan nan nan nan nan nan nan nan nan nan nan nan nan nan nan nan nan nan nan nan nan nan nan nan nan nan nan nan nan nan nan nan nan nan nan nan nan nan nan nan nan nan nan nan nan nan nan nan nan nan nan nan nan nan nan…	nan nan nan nan nan nan nan nan nan nan nan nan nan nan nan nan nan nan nan nan nan nan nan nan nan nan nan nan nan nan nan nan nan nan nan nan nan nan nan nan nan nan nan nan nan nan nan nan nan nan nan nan nan nan nan nan nan nan nan nan nan nan nan nan nan nan nan nan nan nan nan nan nan nan nan nan nan nan nan nan nan nan nan nan nan nan nan nan nan nan nan nan nan nan nan nan nan nan nan nan…	[0.16921493411064148, 0.12722958624362946, 0.13897889852523804, 0.22903671860694885, 0.1591140329837799, 0.1707126796245575, 0.2380090057849884, 0.1132623478770256, 0.16886085271835327, 0.24850130081176758, 0.4564635455608368, 0.1579281985759735, 0.3964556157588959, 0.29145902395248413, 0.5177733898162842, 0.8527064323425293, 0.5048693418502808, 0.7906137108802795, 0.5681612491607666, 0.022287361…	[0.17683684825897217, 0.08593964576721191, 0.07532300800085068, 0.7632776498794556, 0.48883092403411865, 0.6364433765411377, 0.7764414548873901, 0.10264448076486588, 0.8836548924446106, 0.17820167541503906, 0.7577015161514282, 0.6518142223358154, 0.658973217010498, 0.20855413377285004, 0.12124360352754593, 0.4409264028072357, 0.6824703812599182, 0.360923707485199, 1.002678632736206, 0.36538055539…	0
ENSG00000013392.8	human-mRNA	1023	GGGAUCUCGGCUCACUGCAUCCUCAGCUUCCCAGGUUCAAGCGAUUCUCCUGCCUCAGCCUCCCAAGUAGCUGGGACUACAGGCGUGCGCCACCACGCCCAGCUAAUUGUUAUAUUUUUAGUAGAGACAGGGUUUCAUCAUGUUGGCUAGGAUGGUCUCAAUCUCUUAACCUCGUGAUCUGCCUGCCUCGGCCUUCCAAAGUGCUGGGAUUACAGGUGUGAGCCACCGCGCCCAGCCCGUUUACUUCAUUUCUUACUUUAAACUCCUAUUUCGAGUGUUUUAGUAAAACUAGAUCCUAAUAGCAGUGGCAAAGGACUCAUAGACAUGAAGUCCCACGAGUUAAAAGAUGACACACAAUGCUAUGUGUUCUGGCUGUUUAUAUCAGUUCAUGAUACUAGC…	nan nan nan nan nan nan nan nan nan nan nan nan nan nan nan nan nan nan 0.1388 nan 0.1583 0.0592 nan 0.2715 0.5826 nan 0.1582 nan nan 0.12 0.0518 0.1278 0.3365 nan nan nan nan 0.2631 0.4331 0.3613 nan 0.2308 nan 0.3896 nan nan 0.0695 nan 0.1773 0.0302 nan nan 0.1782 0.1085 nan 0.1838 0.6001 nan 0.2034 0.0356 nan 0.1808 0.1747 0.0786 0.3827 0.3866 nan nan 0.1254 nan 0.0181 nan nan nan nan 0.4556 0…	nan nan nan nan nan nan nan nan nan nan nan nan nan nan nan nan nan nan 0.18301687763713081 nan 0.2087289029535865 0.07805907172995781 nan 0.35799050632911394 0.7681962025316457 nan 0.20859704641350213 nan nan 0.15822784810126583 0.06830168776371308 0.1685126582278481 0.4436972573839663 nan nan nan nan 0.34691455696202533 0.5710706751054853 0.4763976793248946 nan 0.30432489451476796 nan 0.5137130…	[0.21337679028511047, 0.19966599345207214, 0.15736868977546692, 0.4600786566734314, 0.2248035967350006, 0.14169728755950928, 0.06162656471133232, 0.16735704243183136, 0.11305432766675949, 0.2839834690093994, 0.0823509693145752, 0.19219332933425903, 0.18444733321666718, 0.47733867168426514, 0.07804485410451889, 0.2806481420993805, 0.41961395740509033, 0.12054616212844849, 0.3029036521911621, 0.147…	[0.20793992280960083, 0.0936645120382309, 0.10487629473209381, 0.8651502728462219, 0.05689537525177002, 0.3313301205635071, 0.06912955641746521, 0.356171190738678, 0.14520011842250824, 0.17052339017391205, 0.2654944360256195, 0.14204180240631104, 0.4794425070285797, 0.6551821231842041, 0.37613391876220703, 0.17795182764530182, 0.1330268830060959, 0.540298581123352, 0.6813764572143555, 0.044206783…	9.29
ENSG00000014123.10	human-mRNA	1001	GGGAGGCCACGCAGAGGUUGUCCGAGCGGAACUGCAUUGAGAUUGUUAAUAAAUUGAUUGCUCAGAAACAGCUAGAAGUAGUUCAUACACUCGAUGGAAAGGAAUAUAUUACUCCAGCCCAAAUUAGUAAAGAAAUGAGAGAUGAGCUACAUGUCCGAGGUGGUCGAGUAAACAUUGUUGAUCUACAACAGGUAAUUAAUGUGGACCUGAUUCAUAUUGAAAAUAGAAUUGGUGACAUUAUUAAAUCAGAAAAGCAUGUUCAGUUAGUGUUGGGACAACUGAUAGAUGAGAAUUAUUUGGAUCGGUUGGCAGAAGAGGUCAAUGAUAAAUUGCAAGAAAGUGGUCAGGUCACCAUAUCAGAACUGUGUAAAACUUAUGAUCUUCCUGGGAACUUUCUGA…	nan nan nan 0.3028 nan nan 0.1776 0.1611 0.3508 0.6347 nan 0.2409 0.2692 nan 0.4444 nan nan nan nan nan nan 0.1582 0.1471 nan 0.4326 nan 0.3489 nan nan 0.2547 0.3651 0.1808 nan nan 0.1274 0.5643 nan nan nan 0.5627 nan 0.2998 nan nan nan nan nan 0.5322 0.4893 nan 0.4858 0.5355 0.7057 nan nan nan 0.3696 nan nan nan 0.0864 nan 0.1392 0.3921 nan 0.5145 0.6161 0.3923 0.1418 0.2172 nan 0.1495 nan 0.791…	nan nan nan 0.39926160337552746 nan nan 0.23417721518987344 0.21242088607594936 0.4625527426160338 0.8368934599156119 nan 0.31764240506329117 0.354957805907173 nan 0.5859704641350212 nan nan nan nan nan nan 0.20859704641350213 0.19396097046413505 nan 0.5704113924050633 nan 0.4600474683544304 nan nan 0.3358386075949367 0.4814082278481013 0.23839662447257384 nan nan 0.16798523206751056 0.7440664556…	[0.19054269790649414, 0.2020401507616043, 0.10482092946767807, 0.23664668202400208, 0.11500241607427597, 0.13420657813549042, 0.0786433070898056, 0.038338419049978256, 0.18376895785331726, 0.16973015666007996, 0.15821850299835205, 0.13656042516231537, 0.19977852702140808, 0.06373539566993713, 0.3849746286869049, 0.26894423365592957, 0.31170719861984253, 0.3660103678703308, 0.3224034309387207, 0.2…	[0.15891790390014648, 0.12750574946403503, 0.1275353580713272, 0.7962605953216553, 0.1473844349384308, 0.11712374538183212, 0.18885228037834167, 0.18113425374031067, 0.3569721579551697, 0.6181262135505676, 0.31005749106407166, 0.3862389624118805, 0.9058155417442322, 0.0728490874171257, 0.997898519039154, 0.10734792053699493, 0.10491633415222168, 0.079950250685215, 0.09891875088214874, 0.104670740…	0
ENSG00000014164.7	human-mRNA	1020	GGGUGCCAGUGCCUCAGGGGCCCAGCGGGGCUCUUUGGAAGAAUUUGAGGAAACCCCCUGGAGUGACCAAAGGCCCCGGGAAGGUGAAGGUGAGCCCCCUCGGGGACAGCUGCAGCCCUCGAGGCCAACAAGAGCCAGGGGGACCUGCAGUGUGGAAGAUCCUCUUCUGGUCUGCCAGAAGGAGCCUGGUAAGCCCAGGAUGGUGAAGUCAGUGGGCAGUGUGGGCGACAGCCCCCGGGAGCCCCGCCGGACAGUCAGUGAGAGUGUGAUUGCCGUCAAGGCGAGCUUCCCAUCCUCCGCUCUGCCCCCACGCACUGGCGUGGCCCUGGGCCGGAAGCUGGGUUCUCAUUCCGUGGCCAGCUGUGCUCCACAGCUCCUUGGGGACAGGAGAGUAGAUGC…	nan nan nan nan nan 0.0799 0.0723 0.1919 nan nan nan 0.0858 0.0775 nan 0.215 0.4347 nan nan nan nan 0.0911 0.0606 0.1061 0.5056 nan 1.0 nan nan nan nan 0.2196 nan 0.0375 nan nan nan nan nan 0.4979 0.5796 nan 0.7351 0.5393 nan nan nan nan 0.2901 nan nan 0.387 1.0 0.5069 0.1413 0.046 0.0534 0.0408 0.0458 nan nan nan 0.3716 nan nan nan 0.8307 0.4831 0.309 0.3287 0.6032 0.4925 nan nan 0.026 0.0147 0.…	nan nan nan nan nan 0.10535337552742616 0.09533227848101267 0.2530327004219409 nan nan nan 0.11313291139240507 0.10218881856540085 nan 0.2834915611814346 0.5731803797468354 nan nan nan nan 0.12012130801687765 0.07990506329113925 0.13989978902953587 0.6666666666666667 nan 1.3185654008438819 nan nan nan nan 0.28955696202531644 nan 0.04944620253164557 nan nan nan nan nan 0.6565137130801688 0.7642405…	[0.21509188413619995, 0.17849507927894592, 0.0886719822883606, 0.30325591564178467, 0.260642945766449, 0.1366412192583084, 0.07942626625299454, 0.37112826108932495, 0.20682933926582336, 0.25933435559272766, 0.42225995659828186, 0.10692405700683594, 0.13707414269447327, 0.20663578808307648, 0.18934719264507294, 0.3377067744731903, 0.2136942446231842, 0.07192125171422958, 0.11794483661651611, 0.078…	[0.1403687596321106, 0.08524493128061295, 0.16940736770629883, 0.12626606225967407, 0.19912424683570862, 0.2535041570663452, 0.23705452680587769, 0.5871211290359497, 0.10453866422176361, 0.13072490692138672, 0.19227737188339233, 0.31073111295700073, 0.2451060265302658, 0.10366734862327576, 0.3299023509025574, 0.7122164964675903, 0.10633660107851028, 0.10429997742176056, 0.11908712983131409, 0.207…	0
ENSG00000015676.18	human-mRNA	1015	GGGACGCUGUCUGGUGGGUGAUUCUCUGCCCUGAGCCACCACCCUGGACUGGCCCAGUCUCCAGAGCUGGCACACCCUGCCUGUUUUCUCUUUUUAGACACAACAGCCGCAGUUUGGCCAGCCACUAAGUCCCACCAGCUGAGGUCCGAGGAAAGCGGGGUGACUCAUUUCCCUUGUCCAGGGCCCGAGGAGAGUGAGGUGUCCAGCCUGCAAAGCUAUUCCAGCUCCUUGGUGUUGGUUUGCAAUAAAUUGGUAUUUAAGCAGUUCUGGGUCUGCGUGUGACAUUUGCUGCUGAGACAGUUCUGUCUGUGCAUGGUCAUUAUUGUUGCAUUCUAGCCUUGAGGUCCCAGGCCAACGUACACAGCAAACACCAGCAUGGGGAAUUCUUAGGGGUUGUUU…	nan nan nan 0.0802 0.1675 nan 0.3416 nan nan nan 0.0487 nan nan nan nan nan nan nan nan nan 0.4919 nan nan 0.3527 nan 0.2427 nan nan 0.9719 0.5244 0.0562 nan nan 0.4303 nan 0.1612 0.0313 0.1199 0.3 0.2044 0.5008 0.2289 0.1155 0.1317 nan nan nan 0.4174 0.3806 nan nan nan 0.1227 0.1066 0.0353 0.0971 nan nan 0.2861 nan 0.7071 0.2098 0.2335 nan 0.6157 nan 0.0863 nan nan nan 0.0735 0.5967 0.1475 0.182…	nan nan nan 0.10574894514767932 0.22085970464135024 nan 0.4504219409282701 nan nan nan 0.06421413502109705 nan nan nan nan nan nan nan nan nan 0.6486023206751055 nan nan 0.46505801687763715 nan 0.32001582278481017 nan nan 1.2815137130801688 0.6914556962025317 0.07410337552742616 nan nan 0.5673786919831224 nan 0.21255274261603377 0.041271097046413505 0.15809599156118145 0.39556962025316456 0.26951…	[0.2524104714393616, 0.25089791417121887, 0.1794770061969757, 0.1879490613937378, 0.2578311562538147, 0.12528717517852783, 0.362891286611557, 0.3362284004688263, 0.3293088674545288, 0.48247483372688293, 0.1831364929676056, 0.2353539913892746, 0.20390716195106506, 0.14812320470809937, 0.3242100179195404, 0.12002041935920715, 0.23491224646568298, 0.21549540758132935, 0.3856959939002991, 0.202948212…	[0.24635545909404755, 0.14694146811962128, 0.12339470535516739, 0.5589454174041748, 0.598845362663269, 0.2594025135040283, 0.46756455302238464, 0.15192072093486786, 0.11233668774366379, 0.2340274155139923, 0.3262147009372711, 0.11272769421339035, 0.1096964180469513, 0.24987313151359558, 0.17336145043373108, 0.15231311321258545, 0.06551103293895721, 0.16840064525604248, 0.14048516750335693, 0.1132…	0
ENSG00000016490.16	human-mRNA	637	GGGGGGACGUCCAUCUGCAGCGGGCUUCGAUCGGCAUUUACUGUGAUUAGGAAGAAAUAUCCAACUGAUGGAUCUGAAAUUGUGCUGCUGACGGAUGGGGAAGACAACACUAUAAGUGGGUGCUUUAACGAGGUCAAACAAAGUGGUGCCAUCAUCCACACAGUCGCUUUGGGGCCCUCUGCAGCUCAAGAACUAGAGGAGCUGUCCAAAAUGACAGGAGGUUUACAGACAUAUGCUUCAGAUCAAGUUCAGAACAAUGGCCUCAUUGAUGCUUUUGGGGCCCUUUCAUCAGGAAAUGGAGCUGUCUCUCAGCGCUCCAUCCAGCUUGAGAGUAAGGGAUUAACCCUCCAGAACAGCCAGUGGAUGAAUGGCACAGUGAUCGUGGACAGCACCGUGGGA…	nan nan nan nan nan nan 0.5297 0.3754 nan nan 0.0758 0.038 0.263 nan 0.0933 nan nan 0.0941 0.1832 nan 0.1456 nan nan nan 0.2087 nan nan 0.1112 nan 0.2072 nan 0.1269 nan nan 0.2507 0.2781 nan nan nan 0.6399 0.6577 nan nan nan nan 0.4246 nan nan 0.6248 nan nan 0.3757 0.5175 nan 0.9273 0.6492 0.6247 nan 0.3865 nan 0.0505 0.084 0.5641 1.0 0.6939 nan nan 0.4297 nan nan nan 0.1499 nan 0.2463 nan nan 0.…	nan nan nan nan nan nan 0.6984440928270041 0.4949894514767933 nan nan 0.09994725738396626 0.05010548523206751 0.346782700421941 nan 0.12302215189873418 nan nan 0.12407700421940929 0.24156118143459918 nan 0.1919831223628692 nan nan nan 0.27518459915611815 nan nan 0.14662447257383965 nan 0.2732067510548523 nan 0.16732594936708864 nan nan 0.33056434599156115 0.36669303797468356 nan nan nan 0.8437500…	[0.12376144528388977, 0.12879860401153564, 0.051566462963819504, 0.04337199777364731, 0.071849025785923, 0.07564829289913177, 0.19819968938827515, 0.20046856999397278, 0.2832849323749542, 0.1488584578037262, 0.06742867082357407, 0.018436945974826813, 0.3084392547607422, 0.15486836433410645, 0.09784544259309769, 0.2261366993188858, 0.14459310472011566, 0.06464590132236481, 0.14376752078533173, 0.1…	[0.09089774638414383, 0.042845726013183594, 0.058153390884399414, 0.05193045735359192, 0.029618456959724426, 0.040904074907302856, 0.6580138206481934, 0.8087001442909241, 0.17667491734027863, 0.14528217911720276, 0.2251635491847992, 0.2983713746070862, 0.49117761850357056, 0.10632717609405518, 0.3102118968963623, 0.12818269431591034, 0.14669519662857056, 0.4405359625816345, 0.40099799633026123, 0…	10.36
ENSG00000019549.13	human-mRNA	498	GGGGCCCCAUCACUGUGUGGACUACCGCUGCUCCAUUCCACGCCCAGCUACCCAAUGGCCUCUCUCCUCUUUCCGGAUACUCCUCAUCUUUGGGGCGAGUGAGUCCCCCUCCUCCAUCUGACACCUCCUCCAAGGACCACAGUGGCUCAGAAAGCCCCAUUAGUGAUGAAGAGGAAAGACUACAGUCCAAGCUUUCAGACCCCCAUGCCAUUGAAGCUGAAAAGUUUCAGUGCAAUUUAUGCAAUAAGACCUAUUCAACUUUUUCUGGGCUGGCCAAACAUAAGCAGCUGCACUGCGAUGCCCAGUCUAGAAAAUCUUUCAGCUGUAAAUACUGUGACAAGGAAUAUGUGAGCCUGGGCGCCCUGAAGAUGCAUAUUCGGACCCACACAUUACCUUGUG…	nan nan nan nan 0.1132 0.0729 0.0928 0.1067 0.2947 nan 0.4625 0.3462 0.4229 nan nan nan nan nan nan nan 0.3812 0.4905 nan 0.571 0.4701 0.2774 nan 0.22 nan nan 0.1275 nan 0.1261 0.1461 0.303 nan nan 0.1924 0.1976 0.3207 0.4298 nan 0.1733 0.2085 0.0797 0.2315 nan 0.2053 nan 0.3869 0.2949 0.2143 0.2429 0.4343 0.455 nan nan nan 0.0729 0.1295 nan 0.1081 nan 0.1119 nan 0.0988 0.0959 nan 0.2549 nan nan …	nan nan nan nan 0.14926160337552744 0.096123417721519 0.12236286919831224 0.1406909282700422 0.388581223628692 nan 0.6098364978902954 0.45648734177215194 0.5576213080168777 nan nan nan nan nan nan nan 0.5026371308016878 0.6467563291139241 nan 0.7529008438818565 0.6198575949367089 0.3657700421940928 nan 0.290084388185654 nan nan 0.16811708860759494 nan 0.1662710970464135 0.19264240506329117 0.3995…	[0.08501449227333069, 0.052861154079437256, 0.11176241934299469, 0.06270159035921097, 0.045477498322725296, 0.05596308037638664, 0.02517230436205864, 0.02289833128452301, 0.35614266991615295, 0.5046349763870239, 0.2533503770828247, 0.11920388042926788, 0.19206233322620392, 0.3439605236053467, 0.16578178107738495, 0.11643603444099426, 0.16046693921089172, 0.2742821276187897, 0.3469741642475128, 0.…	[0.09438830614089966, 0.05346280336380005, 0.02315807342529297, 0.12543967366218567, 0.2996453046798706, 0.2768248915672302, 0.26560622453689575, 0.46979886293411255, 0.6155388355255127, 0.22964011132717133, 0.7308471202850342, 0.5177785158157349, 0.7240904569625854, 0.18687030673027039, 0.12067954987287521, 0.29385706782341003, 0.27789315581321716, 0.17258915305137634, 0.20762650668621063, 0.099…	0
ENSG00000019995.6	human-mRNA	906	GGGAGGACUCAGUGCUUCGGAAAGCCCUGCAUGACAGCCUGCAUGACUGUUCACAUUGGUUUUACACACGCUGGAAAGAUUGGGAAUCAUGGUAUUCUCAGAGCUUUGGUUUACAUUUUUCCUUGAGAGAAGAACAGUGGCAAGAAGACUGGGCAUUUAUACUCUCUCUUGCUAGUCAGCCUGGAGCAAGCUUGGAGCAGACGCACAUUUUUGUACUGGCACAUAUUCUUAGACGACCAAUUAUAGUUUAUGGAGUAAAAUAUUACAAGAGUUUCCGGGGAGAAACUUUAGGAUAUACUCGGUUUCAAGGUGUUUAUCUGCCUUUGUUGUGGGAACAGAGUUUUUGUUGGAAAAGUCCGAUUGCUCUGGGUUAUACGAGGGGCCACUUCUCUGCUUUGG…	nan nan nan 0.1843 nan nan 0.2297 0.1077 nan 0.0922 0.6877 nan nan nan 0.0765 nan nan 0.6233 nan nan 0.4693 0.5097 0.4487 nan 0.1091 0.3718 0.1443 nan nan 0.234 0.3183 nan nan 0.429 0.2801 0.2262 nan 0.2108 0.1029 nan nan 0.5522 0.5751 nan nan 0.4444 0.1583 nan nan nan nan 0.3195 1.0 0.8391 0.7718 nan nan nan nan nan nan nan nan 0.4212 0.6068 0.6534 0.6732 0.6926 0.6907 nan 0.3862 nan nan nan 0.2…	nan nan nan 0.24301160337552744 nan nan 0.30287447257383965 0.14200949367088608 nan 0.12157172995780592 0.9067774261603375 nan nan nan 0.10087025316455696 nan nan 0.8218618143459916 nan nan 0.6188027426160337 0.6720727848101267 0.5916402953586498 nan 0.1438554852320675 0.4902426160337553 0.19026898734177217 nan nan 0.3085443037974684 0.41969936708860767 nan nan 0.5656645569620253 0.36933016877637…	[0.2151859700679779, 0.23006227612495422, 0.12447280436754227, 0.2660788297653198, 0.18051692843437195, 0.19802680611610413, 0.23625034093856812, 0.2211083173751831, 0.06493508815765381, 0.21303853392601013, 0.363264799118042, 0.34918081760406494, 0.22773566842079163, 0.4861953854560852, 0.2951587438583374, 0.212966650724411, 0.22233515977859497, 0.2087210714817047, 0.23196923732757568, 0.2753619…	[0.19427068531513214, 0.1262659877538681, 0.1345881223678589, 0.8558940291404724, 0.10752248018980026, 0.06745972484350204, 0.8784632086753845, 0.3403008282184601, 0.0905349999666214, 0.40547317266464233, 0.8540844917297363, 0.11175820976495743, 0.13791915774345398, 0.1894141584634781, 0.5650808811187744, 0.06802412122488022, 0.06008784472942352, 0.5296081304550171, 0.10694005340337753, 0.1021510…	0
ENSG00000020633.19	human-mRNA	881	GGGAGCCACAGCAACUCACCCACGGCCCUGAGCACGCCAGGCCGCAUGGAUGAGGCCGUGUGGCGGCCCUACUGACCGCCCUGGUGGACUCCUCCCGCUGGAGGCGGGGACCCUAACAACCUUCAAGACCAGUGAUGGGCCGGCUCCGAGGCUCCGGGCGGGAAUGGGACCUGCGCUCCAGGGUGGUCUCGGUCCCAGGGUGGUCCCAGCUGGUGGGAGCCUCUGGCUGCAUCUGUGCAGCCACAUCCUUGUACAGAGGCAUAGGUUACCACCCCCACCCCGGCCCGGGAUACUGCCCCCGGCCCAGAUCCUGGCCGUCUCAUCCCAUACUUCUGUGGGGAAUCAGCCUCCUGCCACCCCCCCGGAAGGACCUCACUGUCUCCAGCUAUGCCCAGUGCU…	nan nan nan 1.0 nan 0.0992 0.0552 0.048 0.0947 0.333 nan 0.3861 0.6237 0.7284 0.0795 nan 0.0388 0.0619 0.0611 0.0088 0.0238 0.2779 0.0907 nan nan 0.2439 0.1418 0.2521 nan nan 0.6737 nan 0.4386 0.5191 0.9309 nan 0.3326 0.1327 0.3027 nan nan 0.0719 0.0232 nan 0.8196 0.5618 nan nan nan 0.1968 nan nan 0.1421 nan nan 0.7095 1.0 nan nan nan nan nan nan 0.1364 nan nan 0.0664 0.0306 0.1314 nan 0.3195 0.9…	nan nan nan 1.3185654008438819 nan 0.1308016877637131 0.07278481012658228 0.06329113924050633 0.12486814345991562 0.4390822784810127 nan 0.5090981012658228 0.8223892405063292 0.9604430379746837 0.10482594936708861 nan 0.05116033755274262 0.08161919831223628 0.08056434599156119 0.011603375527426161 0.031381856540084394 0.36642932489451474 0.11959388185654009 nan nan 0.32159810126582283 0.186972573…	[0.18469563126564026, 0.2581901252269745, 0.1366148144006729, 0.3064488172531128, 0.17282266914844513, 0.23024433851242065, 0.12549301981925964, 0.46675312519073486, 0.13953736424446106, 0.18369963765144348, 0.41143202781677246, 0.2615407109260559, 0.2719399034976959, 0.5468501448631287, 0.14630654454231262, 0.23145991563796997, 0.16855445504188538, 0.45040959119796753, 0.03656107932329178, 0.157…	[0.1591176688671112, 0.06735388934612274, 0.0698118582367897, 0.6465249061584473, 0.09665005654096603, 0.2981221377849579, 0.41205069422721863, 0.6304863095283508, 0.5463746786117554, 0.6908729672431946, 0.08732665330171585, 0.5821494460105896, 0.7237013578414917, 0.6105276346206665, 0.4883068799972534, 0.09587492048740387, 0.6273738145828247, 0.7296899557113647, 0.3704717457294464, 0.27306908369…	0
ENSG00000024862.18	human-mRNA	355	GGGACCGGGGCUCUGCUUGUGGCUGCGGCGGUGGCUUCUGAGGCUGUCGGGUCUUUGCGGGUUGCGGAAGGGGGCCCCAAUACCCUUCUUCUUCAGGUCUUAAGAAGCUGGCCGUGGUGCAAUAAGGAACUUAAAACAAUGGAAGAGCGGAAAGUGAAGAGGAGGAGUCCUAAGUCUUUUAGUGCCCACUGUACUCAGGUUGUCAAUGCCAAAAAAAAUGCCAUUCCAGUGAGUAAAAGCACAGGGUUUUCAAAUCCUGCAUCACAGUCAACUUCACAGCGACCAAAGUUAAAAAGAGUGAUGAAAGAAAAGACCAAACCUCAGGGUGGAGAGGGCAAAGGCGCUCAGUCAACUC	nan nan nan 0.4181 0.494 0.462 nan nan nan nan 0.1592 nan 0.1347 nan nan 0.4706 nan nan nan nan nan nan 0.1557 nan nan 0.2878 nan nan 0.4447 nan nan nan nan nan 0.1814 nan nan 0.2879 nan nan 0.4927 nan nan 0.2536 nan nan nan 0.6741 nan nan nan nan 0.4249 nan nan nan nan 0.6682 nan nan nan nan nan nan 0.5605 nan nan 0.4671 0.4419 nan nan nan nan nan 0.0789 0.0727 0.049 0.1348 0.3616 0.4492 nan 0.5…	nan nan nan 0.551292194092827 0.6513713080168777 0.6091772151898734 nan nan nan nan 0.209915611814346 nan 0.1776107594936709 nan nan 0.6205168776371308 nan nan nan nan nan nan 0.20530063291139242 nan nan 0.37948312236286924 nan nan 0.5863660337552743 nan nan nan nan nan 0.23918776371308018 nan nan 0.3796149789029536 nan nan 0.6496571729957806 nan nan 0.33438818565400846 nan nan nan 0.888844936708…	[0.21393169462680817, 0.16567888855934143, 0.1654806137084961, 0.17958307266235352, 0.1163291335105896, 0.13816200196743011, 0.0660153329372406, 0.039444904774427414, 0.07901337742805481, 0.034386008977890015, 0.10059475898742676, 0.10302571952342987, 0.12520316243171692, 0.2920915484428406, 0.5279746055603027, 0.19894519448280334, 0.4854169487953186, 0.48083019256591797, 0.3433457314968109, 0.44…	[0.14729708433151245, 0.10188859701156616, 0.08602218329906464, 0.5416786670684814, 0.5081599950790405, 0.7500036954879761, 0.1794116199016571, 0.03580427169799805, 0.026193201541900635, 0.10955207049846649, 0.28730395436286926, 0.08833543211221695, 0.20281937718391418, 0.17058610916137695, 0.23464682698249817, 0.4588061571121216, 0.09388131648302078, 0.11507858335971832, 0.15014269948005676, 0.1…	0
ENSG00000025772.8	human-mRNA	927	GGGAAUGACCAGAGCUCUCAUGGACUCGCUUGGGCCUGAGUGGCGCCUGAAGCUGCCCUCAAUCCCCUUGGUGCCUGUUUCAGCUCAGAAGAGGUGGAAUUCCUUGCCUUCGGAGAACCACAAAGAGAUGGCUAAAAGCAAAUCCAAAGAAACCACAGCUACAAAGAACAGAGUGCCUUCUGCUGGGGAUGUGGAGAAAGCCAGAGUUCUGAAGGAAGAAGGCAAUGAGCUUGUAAAGAAGGGAAACCAUAAGAAAGCUAUUGAGAAGUACAGUGAAAGCCUCUUGUGUAGUAACCUGGAAUCUGCCACGUACAGCAACAGAGCACUCUGCUAUUUGGUCCUGAAGCAGUACACAGAAGCAGUGAAGGACUGCACAGAAGCCCUCAAGCUGGAUGGAAA…	nan nan nan 0.2852 0.1406 nan nan 0.462 0.4865 0.0855 0.3023 nan 0.1865 nan 0.0537 nan 0.218 nan 0.271 0.1996 nan nan nan 0.488 0.1244 nan 0.3604 nan 0.1474 nan nan nan nan nan 1.0 0.4004 nan nan 0.1581 nan nan nan nan 0.4304 nan 0.244 0.2894 nan nan 0.6268 0.6369 nan 0.2802 nan nan 0.1193 0.0427 0.0313 nan 0.1701 0.264 0.437 nan 0.2926 0.0821 0.0851 0.3759 nan nan nan nan nan nan 0.1511 0.1332 n…	nan nan nan 0.37605485232067515 0.18539029535864981 nan nan 0.6091772151898734 0.6414820675105486 0.11273734177215192 0.39860232067510554 nan 0.24591244725738398 nan 0.07080696202531646 nan 0.28744725738396626 nan 0.357331223628692 0.26318565400843885 nan nan nan 0.6434599156118144 0.1640295358649789 nan 0.475210970464135 nan 0.1943565400843882 nan nan nan nan nan 1.3185654008438819 0.52795358649…	[0.24384982883930206, 0.23105782270431519, 0.27444764971733093, 0.4193617105484009, 0.44432979822158813, 0.67098468542099, 0.25875478982925415, 0.27196288108825684, 0.10789184272289276, 0.1385008841753006, 0.26914092898368835, 0.07988743484020233, 0.27086055278778076, 0.34744423627853394, 0.25183337926864624, 0.10077103972434998, 0.03971271216869354, 0.08819092065095901, 0.24225753545761108, 0.53…	[0.15359267592430115, 0.1293334662914276, 0.10533881187438965, 0.7098643779754639, 0.520129919052124, 0.24535933136940002, 0.0986744612455368, 0.7963775396347046, 0.3900745213031769, 0.287649929523468, 0.770183801651001, 0.06707675755023956, 0.7191048860549927, 0.1606271117925644, 0.3890087306499481, 0.11713937669992447, 0.26430022716522217, 0.14013800024986267, 0.40917128324508667, 0.61345005035…	0
ENSG00000026025.16	human-mRNA	291	GGGUCUGGAUUCACUCCCUCUGGUUGAUACCCACUCAAAAAGGACACUUCUGAUUAAGACGGUUGAAACUAGAGAUGGACAGGUUAUCAACGAAACUUCUCAGCAUCACGAUGACCUUGAAUAAAAAUUGCACACACUCAGUGCAGCAAUAUAUUACCAGCAAGAAUAAAAAAGAAAUCCAUAUCUUAAAGAAACAGCUUUCAAGUGCCUUUCUGCAGUUUUUCAGGAGCGCAAGAUAGAUUUGGAAUAGGAAUAAGCUCUAGUUCUUAACAACCGACACUCCUACAAGAU	nan nan nan nan 0.1242 nan nan nan 0.211 nan nan 0.2366 0.4623 0.4645 nan 0.2027 0.0745 0.0589 nan 0.0992 nan nan nan nan nan nan 0.6757 nan 0.0861 0.0666 0.0228 0.5677 0.4675 0.3964 nan 0.1192 nan nan nan nan nan nan nan 0.4376 0.8719 0.4677 0.5444 nan nan 0.1725 nan nan 0.8434 nan nan 0.3775 0.3773 nan 0.6924 1.0 nan nan nan nan nan 1.0 0.1733 0.1186 0.0535 nan 0.0774 nan 0.1837 nan 0.4977 nan …	nan nan nan nan 0.16376582278481014 nan nan nan 0.2782172995780591 nan nan 0.3119725738396625 0.6095727848101266 0.6124736286919832 nan 0.26727320675105487 0.0982331223628692 0.07766350210970464 nan 0.1308016877637131 nan nan nan nan nan nan 0.890954641350211 nan 0.11352848101265822 0.08781645569620254 0.03006329113924051 0.7485495780590717 0.6164293248945149 0.5226793248945147 nan 0.157172995780…	[0.14907017350196838, 0.07617560029029846, 0.1060928925871849, 0.194215327501297, 0.23242345452308655, 0.16453416645526886, 0.1935431957244873, 0.08527787029743195, 0.24993985891342163, 0.5177378058433533, 0.27632349729537964, 0.16209173202514648, 0.33029985427856445, 0.3147996664047241, 0.15120820701122284, 0.015763897448778152, 0.05921078845858574, 0.05723191797733307, 0.12588247656822205, 0.16…	[0.1016545370221138, 0.04687264561653137, 0.08339429646730423, 0.1788783222436905, 0.475236177444458, 0.1677176058292389, 0.10276594012975693, 0.06459930539131165, 0.6681920289993286, 0.16594862937927246, 0.11423996835947037, 0.666810929775238, 0.698236882686615, 0.8748478889465332, 0.10677728056907654, 0.17851504683494568, 0.16692626476287842, 0.23107615113258362, 0.15114009380340576, 0.29891413…	31.27
ENSG00000034693.15	human-mRNA	276	GGGAGCUGCUUUGCUGUAGUCCACGCCCCCUUGCCGCUCCGGUGACAGUCUCUGCGGAAAGUCACGUUUGUGAUUUCGGGAGAGCACAGAACGGGACGACGGCGCUCUUGCUGGGUCAUCUGGGCCAGGUGACGAAGAAACAGUUUCCUGGUGAAGCAGUCCCUCACCCCUAGUCAGCCCACACCCCUAGGGCCUAAAGAUGCUGAGGUCUGUAUGGAAUUUUCUGAAACGCCACAAAAAGAAAUGCAUCUUCCUGGGCACGGUCCUUGGAGGAGU	nan nan nan 0.274 nan 0.1187 nan nan 0.1216 nan nan nan nan 0.1008 nan nan nan 0.3472 nan nan 0.0618 0.0498 0.2215 0.8277 nan 0.2129 0.098 0.0419 0.5157 0.4066 nan nan nan 0.0528 0.0313 nan 0.1272 nan 0.0284 0.0433 nan nan nan nan 1.0 1.0 0.4949 nan nan 0.0193 nan 0.0173 nan nan 0.0434 nan nan 0.1574 0.1432 0.1843 nan nan 0.0153 0.074 0.0148 nan nan nan nan nan nan nan 0.1662 nan nan nan 0.0365 n…	nan nan nan 0.3612869198312237 nan 0.1565137130801688 nan nan 0.16033755274261605 nan nan nan nan 0.1329113924050633 nan nan nan 0.4578059071729958 nan nan 0.0814873417721519 0.06566455696202532 0.29206223628691985 1.0913765822784811 nan 0.2807225738396625 0.12921940928270043 0.055247890295358655 0.67998417721519 0.5361286919831224 nan nan nan 0.06962025316455696 0.041271097046413505 nan 0.167721…	[0.17754077911376953, 0.2058008909225464, 0.09650631994009018, 0.37286508083343506, 0.22969475388526917, 0.12813805043697357, 0.14530140161514282, 0.0786784440279007, 0.159428209066391, 0.3543489873409271, 0.31255340576171875, 0.37194281816482544, 0.1645205020904541, 0.20792251825332642, 0.3814631700515747, 0.31967708468437195, 0.600986897945404, 0.3572503924369812, 0.24436497688293457, 0.2427838…	[0.12187658250331879, 0.06251227855682373, 0.06120115518569946, 0.5954676866531372, 0.12265989929437637, 0.2414804995059967, 0.1142396554350853, 0.14495094120502472, 0.368458092212677, 0.06940288841724396, 0.09229511767625809, 0.13423526287078857, 0.17230871319770813, 0.33461499214172363, 0.14454415440559387, 0.11304326355457306, 0.18701937794685364, 0.6079920530319214, 0.06893894076347351, 0.140…	0
ENSG00000049860.14	human-mRNA	261	GGGUGGUGGAGAAGCUUGUCUAUGGGGAGAAUAUGUGGAUGCAACUAACCUCACUCCAAGAUUAUGGCCUCGGGCAAGUGCUGUUGGUGAGAGACUCUGGAGUUCCAAAGAUGUCAGAGAUAUGGAUGACGCCUAUGACAGACUGACAAGGCACCGCUGCAGGAUGGUCGAACGUGGAAUAGCUGCACAACCUCUUUAUGCUGGAUAUUGUAACCAUGAGAACAUGUAAAAAAUGGAGGGGAAAAAGGCCACAGCAAUCUG	nan nan nan nan nan nan nan nan nan 0.4536 nan 0.7556 0.6967 nan 0.2875 nan nan nan nan 0.2464 nan 0.5779 nan nan nan nan nan 0.7421 nan 0.723 0.4565 nan 0.6073 nan nan nan nan nan 0.5106 nan nan 0.5702 0.5521 0.5446 0.5203 nan 0.6466 1.0 0.7241 0.2705 nan 0.3974 0.8143 0.4378 nan 0.1951 0.154 0.6004 0.678 nan 0.8588 nan nan 0.5974 nan nan nan 0.0884 0.0459 nan 0.2212 nan nan nan 0.2124 0.4062 0.…	nan nan nan nan nan nan nan nan nan 0.5981012658227849 nan 0.9963080168776373 0.9186445147679325 nan 0.379087552742616 nan nan nan nan 0.3248945147679325 nan 0.7619989451476793 nan nan nan nan nan 0.9785073839662447 nan 0.9533227848101266 0.6019251054852321 nan 0.8007647679324894 nan nan nan nan nan 0.6732594936708862 nan nan 0.7518459915611815 0.7279799578059073 0.7180907172995781 0.686049578059…	[0.1461312472820282, 0.16227774322032928, 0.11250022053718567, 0.40357232093811035, 0.20921871066093445, 0.2515724301338196, 0.5659694671630859, 0.24171555042266846, 0.27329856157302856, 0.397892028093338, 0.13622839748859406, 0.17833931744098663, 0.2506682276725769, 0.19996638596057892, 0.17282520234584808, 0.28018081188201904, 0.26657968759536743, 0.2549676299095154, 0.12281319499015808, 0.1342…	[0.11687982827425003, 0.09077273309230804, 0.16788999736309052, 0.19769901037216187, 0.18374931812286377, 0.17276212573051453, 0.24984559416770935, 0.09849385917186737, 0.05764879286289215, 0.7391918301582336, 0.11654199659824371, 0.8294906616210938, 0.8257386088371277, 0.14156442880630493, 0.44059714674949646, 0.12333184480667114, 0.1531781256198883, 0.1466105878353119, 0.2095162570476532, 0.375…	0
ENSG00000052723.12	human-mRNA	259	GGGAACUCACUGCAACCUCCACCUCCUGGGUUCAAGCGAUUCUCCUGCCUCAGCCUCCCAAGUCGCUGGGAUUACAAGUGCCCACCACCAUGCACAGCUAAUUUUUGUGUUUUUAGUAGAUGGGGUUUCUCCAUGUUGGCCAGGCUGGUCUCGAACUUAUGACUUCAGGUGAUCCGCCCGCCUUGGCCUCCCAAAGUGCUGGGAUUAUAGGCGUGAGCCACUGUGCCUGGCCUGUAACCUCUAAUUCUUGUUUGCUGGC	nan nan nan 1.0 0.8994 0.8243 nan 0.3392 0.5402 0.493 nan nan 0.5776 0.5045 0.6467 0.3139 0.0582 nan 0.3763 0.1921 0.4897 0.3226 0.0809 nan 0.1864 0.1568 nan nan nan nan nan nan 0.5885 0.8743 0.682 nan 0.3823 nan 0.6709 nan nan 0.2451 nan 0.1827 0.1599 nan nan 0.3066 0.1802 nan 0.3915 0.7832 nan 0.3264 0.1485 nan 0.1403 0.1167 0.2839 0.945 0.8869 nan nan 0.7709 nan 0.4858 nan nan nan nan 0.5181 n…	nan nan nan 1.3185654008438819 1.1859177215189873 1.086893459915612 nan 0.44725738396624476 0.712289029535865 0.6500527426160337 nan nan 0.7616033755274262 0.6652162447257384 0.8527162447257385 0.4138976793248946 0.07674050632911393 nan 0.4961761603375528 0.2532964135021097 0.645701476793249 0.4253691983122363 0.10667194092827005 nan 0.2457805907172996 0.20675105485232068 nan nan nan nan nan nan …	[0.2316555678844452, 0.20216038823127747, 0.1878785490989685, 0.2631436288356781, 0.1911783516407013, 0.17112624645233154, 0.1834491789340973, 0.2751750648021698, 0.3011607527732849, 0.2041819542646408, 0.3472573757171631, 0.28791433572769165, 0.22016018629074097, 0.22865387797355652, 0.3921245038509369, 0.02975882962346077, 0.0724547952413559, 0.2689603269100189, 0.10440417379140854, 0.060352727…	[0.18199442327022552, 0.13626453280448914, 0.13286960124969482, 0.48229968547821045, 0.48391228914260864, 0.527119517326355, 0.11704902350902557, 0.3872617483139038, 0.5509180426597595, 0.47846293449401855, 0.22246485948562622, 0.167117178440094, 0.863716721534729, 0.5388041734695435, 0.5438807010650635, 0.3615160584449768, 0.17084237933158875, 0.17785567045211792, 0.21757018566131592, 0.35093808…	37.45
ENSG00000057468.7	human-mRNA	299	GGGGCAGCUUCUGUAGUUGGGCUACUGGAGGGGUCGCUCAGAAACCUCAUACUUCUCGGGUCAGGGAAGGUUUGGGAGGAUGCUGAGGCCUGAGAUCUCAUCAACCUCGCCUUCUGCCCCGGCGGUUUCCCCGUCGUCGGGAGAAACCCGCUCACCUCAGGGUCCCCGCUACAAUUUCGGACUCCAGGAGACUCCACAGAGCCGCCCUUCGGUCCAGGUGGUCUCUGCAUCCACCUGUCCUGGCACGUCAGGAGCUGCGGGCGACCGGAGCAGCAGCAGCAGCAGCCUUCCCUGCCCCG	nan nan nan nan 0.2249 0.1894 nan 1.0 nan nan 0.3194 nan nan nan 0.3511 nan nan nan nan nan nan 0.2424 nan 0.4359 0.4581 nan nan nan 0.2938 nan nan nan nan nan 0.3069 nan 0.3194 nan 0.2953 0.3574 nan 0.6258 0.5232 0.7016 0.3074 0.1179 nan 0.2884 0.56 nan 0.9443 0.447 nan nan 0.2362 nan 0.1688 nan nan nan nan 0.469 0.6309 nan nan nan 0.1922 0.2003 nan nan nan nan nan nan nan nan 0.2796 nan nan 0.3…	nan nan nan nan 0.29654535864978904 0.24973628691983124 nan 1.3185654008438819 nan nan 0.4211497890295359 nan nan nan 0.46294831223628696 nan nan nan nan nan nan 0.319620253164557 nan 0.5747626582278481 0.6040348101265823 nan nan nan 0.3873945147679325 nan nan nan nan nan 0.4046677215189874 nan 0.4211497890295359 nan 0.38937236286919835 0.4712552742616034 nan 0.8251582278481013 0.689873417721519 …	[0.10099177062511444, 0.06688791513442993, 0.08305186778306961, 0.061059918254613876, 0.07496204972267151, 0.1453527808189392, 0.1497429460287094, 0.1828155517578125, 0.5363423824310303, 0.42321598529815674, 0.17289677262306213, 0.45836764574050903, 0.36248689889907837, 0.36338287591934204, 0.49563002586364746, 0.2319900542497635, 0.367165744304657, 0.560072660446167, 0.24193304777145386, 0.16458…	[0.13097679615020752, 0.05439372360706329, 0.055697932839393616, 0.1703503429889679, 0.3138808608055115, 0.4798316955566406, 0.10526304692029953, 0.4985142946243286, 0.15675461292266846, 0.18189328908920288, 0.2693987488746643, 0.17020532488822937, 0.08839622884988785, 0.150716170668602, 0.4515848755836487, 0.10332730412483215, 0.1963602602481842, 0.18541954457759857, 0.13213315606117249, 0.07734…	0
ENSG00000059378.13	human-mRNA	834	GGGUAGCUGCGUGAACAGUGUGUCCGACCCCUCCAUCUUUGUGAUCUUUGAGAAACACCAGGUCUACCCAGAGUAUGUCAUCCAGUACACCACCUCCUCCAAGCCCUCGGUCACACCCUCCAUCCUGCUGGCCUUGGGCUCCCUGUUCAGCAGCCGACAGUGAGCGCACAGGAGUGUUCCAGGCCUUUCACCUGCUCUGCCUUGAAAUGGCUAUUUGGGCCUUUCCUUUUCUUUUUAAACAGAAACUUUUAAUGAACUGUUCUCUUAACAUUGACCUCUCAAUGAAGUUAUGUUCUUAAUCUCUUGCUAAUAAUGAUUUUUACUUUUAAGUCACUUUUGGGUUCACUAGUGGAUUAACCAGAAGUGAUUGUAGUUGAGUCCAGUUUUGCUUUUUAAUAA…	nan nan nan nan 0.2396 nan 0.1026 nan nan 0.3556 nan nan nan 0.4087 0.758 0.7854 0.4191 nan nan nan nan nan nan 0.0949 0.1106 nan 0.669 0.2434 0.0648 0.026 0.0668 nan 0.1446 0.1748 0.3178 nan 0.4548 nan nan nan nan nan nan 0.4404 nan 0.3598 nan nan nan nan 0.4895 nan 0.6995 0.5365 0.5541 0.2013 0.4729 0.2922 0.2418 0.3271 nan nan nan 0.1298 nan 0.3887 0.1403 0.1564 0.0819 0.4495 nan 0.6005 nan na…	nan nan nan nan 0.3159282700421941 nan 0.13528481012658228 nan nan 0.46888185654008446 nan nan nan 0.5388976793248945 0.9994725738396625 1.0356012658227849 0.5526107594936709 nan nan nan nan nan nan 0.12513185654008438 0.14583333333333334 nan 0.8821202531645571 0.32093881856540085 0.08544303797468354 0.034282700421940926 0.08808016877637131 nan 0.19066455696202533 0.23048523206751056 0.4190400843…	[0.16028746962547302, 0.12053871154785156, 0.08453011512756348, 0.25647827982902527, 0.2896443009376526, 0.1582469642162323, 0.16851875185966492, 0.23767156898975372, 0.1409274935722351, 0.1727294921875, 0.5947895646095276, 0.48364806175231934, 0.2558133602142334, 0.4229336380958557, 0.32255440950393677, 0.12073210626840591, 0.29054200649261475, 0.31065359711647034, 0.26880428194999695, 0.1263339…	[0.11382512748241425, 0.051339536905288696, 0.12264978885650635, 0.13510142266750336, 0.5794081687927246, 0.1125447005033493, 0.36020374298095703, 0.09678766876459122, 0.14001253247261047, 0.8273327350616455, 0.1756054162979126, 0.3033519983291626, 0.13222968578338623, 0.6630433201789856, 0.755502462387085, 0.5712876915931702, 0.7456631660461426, 0.1394326090812683, 0.28889355063438416, 0.1850198…	0
ENSG00000060491.17	human-mRNA	744	GGGGGACUACUUCAUGUUCGCCGUGCGCUGCCGACACCAGCGCCGCCAGCUGGUGCACUUCGCCUGGGAGCACUUCCGGCCCCGCUGCAAGUUCGUCUGGGGGCCCCAAGACAAGCUGCGGAGGUUCAAGCCCAGCUCUCUGCCCCAUCCGCUCGAGGGCUCCAGGAAGGUGGAGGAGGAAGGAAGCCCCGGGGACCCCGACCACGAGGCCAGCACCCAGGGUCGGACCUGUGGGCCAGAGCAUAGCAAGGGUGGGGGCAGGGUGGACGAGGGGCCCCAGCCACGGAGCGUGGAGCCCCAGGAUGCGGGACCCCUGGAGAGGAGCCAGGGGGAUGAGGCAGGGGGCCACGGGGAAGAUAGGCCGGAGCCCUUAAGCCCCAAAGAGAGCAAGAAGAGGAA…	nan nan nan nan nan 0.3111 0.2227 nan 0.5714 0.4626 nan nan 0.3787 0.4986 nan nan nan nan 0.1153 nan 0.1538 0.1053 nan nan nan 0.1368 nan 0.0837 nan nan 0.2176 0.1288 nan 1.0 0.2538 0.3257 0.6094 0.0253 0.1143 nan 0.1085 nan 0.2967 0.2518 nan 0.3554 0.2787 0.5614 nan 0.0998 nan nan nan nan nan 0.3172 0.8185 0.2154 nan nan 0.1468 nan 0.133 0.1298 nan nan nan nan 0.3963 nan 0.1589 0.6331 0.3232 nan…	nan nan nan nan nan 0.41020569620253167 0.2936445147679325 nan 0.7534282700421941 0.6099683544303798 nan nan 0.4993407172995781 0.6574367088607596 nan nan nan nan 0.15203059071729957 nan 0.20279535864978904 0.13884493670886078 nan nan nan 0.18037974683544306 nan 0.11036392405063292 nan nan 0.2869198312236287 0.169831223628692 nan 1.3185654008438819 0.3346518987341773 0.4294567510548523 0.80353375…	[0.13236811757087708, 0.0865735113620758, 0.04325832426548004, 0.07332675904035568, 0.1351742446422577, 0.2002590000629425, 0.15620899200439453, 0.45091912150382996, 0.4409734904766083, 0.1009451299905777, 0.45249035954475403, 0.45732754468917847, 0.15079045295715332, 0.49821150302886963, 0.5651165843009949, 0.2847374677658081, 0.5299602746963501, 0.3829447031021118, 0.3236057758331299, 0.2441842…	[0.10418816655874252, 0.07262065261602402, 0.05623868107795715, 0.04976661503314972, 0.055337682366371155, 0.6046246290206909, 0.358537495136261, 0.1247195154428482, 0.4922333359718323, 0.33327990770339966, 0.08845354616641998, 0.11505098640918732, 0.36413198709487915, 0.45619338750839233, 0.15734031796455383, 0.10478010773658752, 0.1083492785692215, 0.06538040935993195, 0.3350411057472229, 0.136…	0
ENSG00000060762.19	human-mRNA	533	GGGCCUCGGAACUGGCUUCUGUUUGCAUGCCACGCAACAAAUGAAGUAGCCCAGCUCAUCCAGGGAGGGCGGCUUAUCAAACACGAGAUGACUAAAACGGCAUCUGCAUAACAAUGGAAAAGGAAGAACAAGGUCUUGAAGGGACAGCAUUGCCAGCUGCUGCUGAGUCACAGAUUUCAUUAUAAAUAGCCUCCCUAAGGAAAAUACACUGAAUGCUAUUUUUACUAACCAUUCUAUUUUUAUAGAAAUAGCUGAGAGUUUCUAAACCAACUCUCUGCUGCCUUACAAGUAUUAAAUAUUUUACUUCUUUCCAUAAAGAGUAGCUCAAAAUAUGCAAUUAAUUUAAUAAUUUCUGAUGAUGGUUUUAUCUGCAGUAAUAUGUAUAUCAUCUAUUAGAAU…	nan nan nan 0.09 0.1347 nan 0.3923 nan nan 0.6596 0.6018 0.4001 nan nan nan 0.2731 nan nan 0.0695 nan nan nan nan nan nan 0.1472 0.6101 nan nan 0.4767 0.4996 0.4551 0.6989 nan 0.19 0.2351 0.3578 0.3752 0.6127 0.5937 0.4834 nan nan 0.235 0.2094 nan nan 0.4685 nan 0.1679 0.0815 0.0875 0.449 nan 0.2509 nan 0.2111 0.5196 nan 0.3643 0.3053 0.3976 nan nan nan 0.4133 nan nan nan 0.2373 nan nan 0.1499 na…	nan nan nan 0.11867088607594937 0.1776107594936709 nan 0.5172732067510548 nan nan 0.8697257383966245 0.7935126582278481 0.5275580168776371 nan nan nan 0.3601002109704642 nan nan 0.0916402953586498 nan nan nan nan nan nan 0.19409282700421943 0.8044567510548524 nan nan 0.6285601265822786 0.6587552742616034 0.6000791139240507 0.921545358649789 nan 0.2505274261603376 0.30999472573839665 0.47178270042…	[0.08224372565746307, 0.10760881751775742, 0.11187329888343811, 0.06987065076828003, 0.1513526737689972, 0.14217475056648254, 0.24934332072734833, 0.16861267387866974, 0.2622401714324951, 0.29392755031585693, 0.22538068890571594, 0.2606674134731293, 0.2035607099533081, 0.22977545857429504, 0.16477955877780914, 0.10573655366897583, 0.25272485613822937, 0.1645800918340683, 0.12895943224430084, 0.23…	[0.08599765598773956, 0.03011392056941986, 0.08779013156890869, 0.36598408222198486, 0.3329232931137085, 0.13430778682231903, 0.7491496801376343, 0.13398373126983643, 0.11655393242835999, 0.621538519859314, 0.6851472854614258, 0.8426432609558105, 0.17211474478244781, 0.06798461824655533, 0.0985107570886612, 0.4475655257701874, 0.08373351395130157, 0.08112621307373047, 0.30194732546806335, 0.15308…	0
ENSG00000062650.20	human-mRNA	586	GGGAGUGGAGGACUGCAUGAGGGCCAUCAUCGGGGUGUUGCUUAAUUUAACUAAUGAUAAUGAGUGGGGCAGCACCAAAACAGGAGAGCAGGACGGUCUCAUAGGCACAGCGCUGAACUGUGUGCUUCAGGUUCCAAAGUACCUACCUCAGGAGCAGAGAUUUGAUAUUCGAGUGCUGGGCUUAGGUCUGCUGAUAAAUCUAGUGGAGUAUAGUGCUCGGAAUCGGCACUGUCUUGUCAACAUGGAAACAUCGUGCUCUUUUGAUUCUUCCAUCUGUAGUGGAGAAGGGGAUGAUAGUUUAAGGAUAGGUGGACAAGUUCAUGCUGUCCAGGCUUUAGUGCAGCUAUUCCUUGAGCGAGAGCGGGCAGCCCAGCUAGCAGAAAGUAAAACAGAUGAGUU…	nan nan nan 0.4094 nan nan nan nan 0.2737 nan nan 0.3836 0.337 nan nan 0.5136 0.4777 nan nan 0.3873 nan nan nan 0.215 0.1588 0.316 nan 0.4122 0.5333 nan 0.5128 nan nan nan nan nan nan nan nan nan 0.0781 nan nan 0.3894 0.4618 nan nan nan 0.5248 0.5692 0.5484 nan 0.6769 0.7228 nan nan 0.9424 nan 0.8859 0.7104 nan nan 0.4479 nan nan nan nan nan nan 0.0914 0.1347 nan 0.0676 0.1224 0.0796 0.0834 0.442…	nan nan nan 0.5398206751054853 nan nan nan nan 0.36089135021097046 nan nan 0.5058016877637131 0.44435654008438824 nan nan 0.6772151898734177 0.6298786919831224 nan nan 0.5106803797468354 nan nan nan 0.2834915611814346 0.20938818565400844 0.4166666666666667 nan 0.5435126582278481 0.7031909282700423 nan 0.6761603375527427 nan nan nan nan nan nan nan nan nan 0.10297995780590719 nan nan 0.51344936708…	[0.2022874653339386, 0.21722659468650818, 0.13294702768325806, 0.30068761110305786, 0.18478573858737946, 0.3833126723766327, 0.20407643914222717, 0.2531605362892151, 0.27613356709480286, 0.18190497159957886, 0.2263116091489792, 0.24269185960292816, 0.195411816239357, 0.1956520676612854, 0.16117294132709503, 0.14102327823638916, 0.2303629368543625, 0.41020914912223816, 0.19955357909202576, 0.30055…	[0.16744793951511383, 0.07506144046783447, 0.10451661050319672, 0.5127677917480469, 0.19168026745319366, 0.1675565242767334, 0.12111897021532059, 0.10835295915603638, 0.7308847308158875, 0.07095880806446075, 0.05819755792617798, 0.7010570168495178, 0.4428432285785675, 0.07942896336317062, 0.140158548951149, 0.6722373962402344, 0.3947769105434418, 0.1394985169172287, 0.14011316001415253, 0.7416537…	0
ENSG00000065613.15	human-mRNA	946	GGGAGUGUAGGUGGCGAGUGGGCGAGGGGCGCAGACUUCUUUGAAAUCGAAGGGUACAGUCAAAUCUACUGCUGAUUUGGUUGUUUUGUUGCUGUGGCAGAAUAUGCCAUGAAACACAUACAGACUUCUCCGAACGUGCACCCUCAUCAGCCACCUCCUCCCCUCUUUCCCUGAGUGCUGUGAACACAGCAGACCUGCACACUUCUGCAGAUCCAGCUCCUACAGCUUGGGGCACUAGGCUGCCUUUCCUAGUCCUGUCAACAACCAUACAGUGCGAAUUGCUGAAUUAGCUGCUAUUCUAUGUGGAGUCACAUUAAGCUUUUUCUUAUCUUUUUCUAUGGGGAAGCUAUAGGGUGGGUAAGGAAAAAAUGUUGAAUGCUUUUACUUUGCUGAAAAUAU…	nan nan nan 0.2621 nan nan nan nan 0.1885 nan nan nan nan nan 0.3102 nan 0.5321 nan nan nan nan nan 0.5703 nan 0.2049 nan nan nan nan 0.4759 nan 0.2149 0.3612 nan 0.7917 0.7469 nan nan 0.1194 nan nan nan nan 0.2451 0.3302 0.3628 nan 0.3949 nan 0.4932 0.5731 nan nan nan nan 0.2119 0.0766 0.1273 nan nan 0.0504 0.0936 0.139 0.1001 nan 0.0733 nan 0.4005 1.0 nan nan 0.758 nan nan 0.102 nan nan nan nan…	nan nan nan 0.3455959915611814 nan nan nan nan 0.24854957805907174 nan nan nan nan nan 0.40901898734177217 nan 0.7016086497890296 nan nan nan nan nan 0.7519778481012659 nan 0.2701740506329114 nan nan nan nan 0.6275052742616034 nan 0.28335970464135024 0.47626582278481017 nan 1.0439082278481013 0.9848364978902954 nan nan 0.1574367088607595 nan nan nan nan 0.3231803797468355 0.4353902953586498 0.478…	[0.21273386478424072, 0.2240048348903656, 0.1290862113237381, 0.48363196849823, 0.22303453087806702, 0.48373591899871826, 0.2545774281024933, 0.29211053252220154, 0.323809415102005, 0.1662980020046234, 0.32495397329330444, 0.22293436527252197, 0.19091956317424774, 0.14990808069705963, 0.2161215841770172, 0.0860491693019867, 0.3788854479789734, 0.3131389021873474, 0.539438784122467, 0.190856233239…	[0.19410422444343567, 0.08872363716363907, 0.08948586136102676, 0.8144822120666504, 0.21268852055072784, 0.214639350771904, 0.12005947530269623, 0.09093301743268967, 0.4592647850513458, 0.0683603286743164, 0.24947163462638855, 0.1013934314250946, 0.16833651065826416, 0.14210478961467743, 0.5712729692459106, 0.08494642376899719, 0.9570811986923218, 0.2059665322303772, 0.23926815390586853, 0.182107…	0
ENSG00000066735.16	human-mRNA	1002	GGGACCACCAUGAUCGCCCACGUGUCGGAUGCGCCAGCCCAGCACGCAGAGACACUCAGCACCGUGCAGCUCGCCGCCCGCAUCCACCGCCUGCGCAGGAAGAAGGCCAAGUACGCCUCCAGCUCCUCUGGCGGGGAGAGCUCCUGUGAGGAAGGCCGGGCCCGUCGGCCCCCGCACCUGCGGCCCUUCCACCCACGCACUGUGGCCCUGGACCCCGACCGCACGCCUCCCUGCCUGCCCGGUGACCCCGAUUACUCCUCCAGCAGCGAGCAGUCCUGUGACACGGUCAUCUACGUGGGGCCCGGUGGGGCGGCGCUGUCAGACCGGGAGCUCACCGACAACGAAGGUCCGCCUGACUUCGUGCCCAUCAUCCCUGCCCUGAGCCGCCACCGGCCCUCC…	nan nan nan nan nan nan nan nan nan nan nan nan nan nan nan nan nan nan nan nan nan nan nan nan nan nan nan nan nan nan nan nan nan nan nan nan nan nan nan nan nan nan nan nan nan nan nan nan nan nan nan nan nan nan nan nan nan nan nan nan nan nan nan nan nan nan nan nan nan nan nan nan nan nan nan nan nan nan nan nan nan nan nan nan nan nan nan nan nan nan nan nan nan nan nan nan nan nan nan nan…	nan nan nan nan nan nan nan nan nan nan nan nan nan nan nan nan nan nan nan nan nan nan nan nan nan nan nan nan nan nan nan nan nan nan nan nan nan nan nan nan nan nan nan nan nan nan nan nan nan nan nan nan nan nan nan nan nan nan nan nan nan nan nan nan nan nan nan nan nan nan nan nan nan nan nan nan nan nan nan nan nan nan nan nan nan nan nan nan nan nan nan nan nan nan nan nan nan nan nan nan…	[0.207627534866333, 0.1854865849018097, 0.21633629500865936, 0.35523855686187744, 0.13827329874038696, 0.11164028942584991, 0.2392902672290802, 0.1277797371149063, 0.08737559616565704, 0.5905550718307495, 0.5267475247383118, 0.22681933641433716, 0.5418857336044312, 0.4598398208618164, 0.2973235249519348, 0.2829477787017822, 0.06689910590648651, 0.1787514090538025, 0.041461776942014694, 0.38786405…	[0.14865925908088684, 0.09674316644668579, 0.06894278526306152, 0.6696048974990845, 0.23303619027137756, 0.338720440864563, 0.5923944711685181, 0.3431909382343292, 0.3110736906528473, 0.6342363357543945, 0.1447710543870926, 0.1168031319975853, 0.5350562930107117, 0.1152726337313652, 0.5067195892333984, 0.11198034137487411, 0.25595828890800476, 0.13476060330867767, 0.2084570825099945, 0.5331850051…	0
ENSG00000066777.9	human-mRNA	543	GGGGCAGGUCGGCGGUGAUGGGGGCCAGUUCGCGGCCGCGGCGGGUGCUAAUCCCCACAGUAGCCAGGGUAGCCCUUCUCUCGCGGUGCCUCUGAGAGCCGCCGCCACCUCGUCCCUCAGUUCCCGGCAGACAGCCGCCCGGGCCGGGCUCCCUCACCGCCACCAGGGCCGGAGGGACGAGUGAGAGGGGCGGCCGGGACGCGACCCCCGGGCCGGGAGAAGCGGAGGCCCGACGGGCGCGGCCCUCGAGGUACGGCUUCUUGGGGGCGGCGAGGACCUCGACGCCCUUCGCCGACACCGCGGCUGGUCCCGCUCGCCCGCCCCUUCCUGAUCCUGCCGCUGCCCUCCACGCCUCCAAUCCCCCACCUCCACCCCCUCUCCUUUCUCUCUUCUCUUCCU…	nan nan nan nan 0.6161 0.3515 nan nan nan 0.4036 nan nan 0.1701 nan nan nan nan 0.5919 nan nan nan nan nan nan 0.229 0.3605 0.6128 nan nan nan 0.581 nan 0.4758 nan nan 0.142 0.2931 nan 0.3783 nan nan 0.4133 nan nan nan nan nan 0.4005 nan 0.7161 0.6285 nan 0.214 0.047 0.0615 0.2203 0.5194 0.7157 0.7479 nan nan 0.5789 nan 0.3427 0.3425 0.4252 nan nan nan nan 0.5554 nan 0.1617 0.1901 0.1033 nan nan …	nan nan nan nan 0.8123681434599156 0.4634757383966245 nan nan nan 0.5321729957805907 nan nan 0.2242879746835443 nan nan nan nan 0.7804588607594937 nan nan nan nan nan nan 0.30195147679324896 0.4753428270042194 0.8080168776371308 nan nan nan 0.7660864978902954 nan 0.627373417721519 nan nan 0.1872362869198312 0.38647151898734183 nan 0.49881329113924056 nan nan 0.5449630801687764 nan nan nan nan nan…	[0.1293812096118927, 0.1165258139371872, 0.13384230434894562, 0.14673322439193726, 0.22822396457195282, 0.17446431517601013, 0.15564435720443726, 0.4857034981250763, 0.5532646179199219, 0.31295305490493774, 0.19604277610778809, 0.2615929841995239, 0.2580496668815613, 0.2091481238603592, 0.34544095396995544, 0.3500184118747711, 0.15753701329231262, 0.44533205032348633, 0.5879434943199158, 0.100844…	[0.14634296298027039, 0.06363733112812042, 0.05207058787345886, 0.2038712501525879, 0.44275492429733276, 0.4095866084098816, 0.07779756188392639, 0.1601983904838562, 0.145796000957489, 0.448442667722702, 0.19225943088531494, 0.20111620426177979, 0.2534902095794678, 0.12440323829650879, 0.15327586233615875, 0.1050560474395752, 0.1559106409549713, 0.40965861082077026, 0.14319221675395966, 0.1768228…	0
ENSG00000067704.10	human-mRNA	951	GGGCGGUGUAGCGUCUCAGCACAACCUGCCCAUGGAUUGUCUAGUGGACGAAGAUGGAGUUUUCACAGAUGUUGCAGGUCCUGAACUUCAAAACAAGGCUGUCCUUGAAGAGGGAACUGAUGUGGUUAUAAAGAUGCUUCAGACUGCAAAGAAUUUGUUGAAAGAGGAGAAAUUGGUGCAUAGCUAUCCGUAUGACUGGAGGACCAAGAAACCUGUGGUUAUUCGUGCCAGCAAGCAGUGGUUUAUAAACAUCACGGAUAUUAAGACUGCAGCCAAGGAAUUGUUAAAAAAGGUGAAAUUUAUUCCUGGAUCAGCACUGAAUGGCAUGGUUGAAAUGAUGGACAGGCGGCCAUAUUGGUGUAUAUCAAGGCAAAGAGUUUGGGGUGUUCCAAUUCCUGU…	nan nan nan 0.2359 nan nan nan nan nan 1.0 nan 0.2017 nan nan 0.5461 nan 0.7682 0.7494 nan 0.1873 0.2624 0.3382 0.395 0.4119 0.1565 0.0307 nan nan 0.112 0.0842 0.1213 0.0737 nan nan nan 0.2769 nan nan nan nan 0.1305 nan 0.4936 nan nan nan nan 0.4272 0.2302 nan 0.4346 0.4426 nan 0.4709 nan nan nan 0.6565 nan nan nan nan nan 0.0524 0.2194 0.0398 0.2299 nan 0.1351 nan nan nan nan nan 0.0691 0.1285 n…	nan nan nan 0.31104957805907174 nan nan nan nan nan 1.3185654008438819 nan 0.26595464135021096 nan nan 0.720068565400844 nan 1.0129219409282701 0.988132911392405 nan 0.24696729957805907 0.34599156118143465 0.44593881856540085 0.5208333333333334 0.543117088607595 0.2063554852320675 0.04047995780590718 nan nan 0.14767932489451477 0.11102320675105486 0.15994198312236288 0.0971782700421941 nan nan na…	[0.1394907683134079, 0.17682096362113953, 0.08095982670783997, 0.1268458366394043, 0.11453396081924438, 0.33571121096611023, 0.3526880741119385, 0.26746177673339844, 0.31278055906295776, 0.4706277549266815, 0.323472797870636, 0.21150577068328857, 0.5109902620315552, 0.3340250551700592, 0.15290650725364685, 0.11018360406160355, 0.1624438464641571, 0.34357011318206787, 0.43398869037628174, 0.224106…	[0.14009201526641846, 0.10255759209394455, 0.19972220063209534, 0.30458104610443115, 0.14904364943504333, 0.13917015492916107, 0.12359758466482162, 0.14658501744270325, 0.10244785249233246, 0.690147340297699, 0.1303894966840744, 0.5448687076568604, 0.18529145419597626, 0.12006586790084839, 0.28001609444618225, 0.11082282662391663, 0.357468843460083, 0.8205593824386597, 0.1335691511631012, 0.54047…	0
ENSG00000068394.11	human-mRNA	623	GGGGGAGCUGUGGUGGUUCUUUCUGGCCCUCACCGAGGCCUCUAUGGGAAGGUGGAAGGCCUUGAUCCUGACAAUGUUCGGGCCAUGGUUCGUCUGGCUGUGGGGAGCCGGGUGGUGACUGUUAGUGAGUACUACCUGCGGCCUGUCUCCCAGCAGGAGUUUGACAAGAACACCUUGGAUCUCAGGCAACAGAACGGAACUGCCUCAUCACGGAAGACCCUCUGGAAUCAAGAACUCUACAUCCAGCAGGACAACUCAGAGAGGAAGCGGAAACACCUUCCAGACCGACAGGAUGGGCCUGCAGCCAAGAGUGAGAAAGCAGCCCCCAGAAGUCAGCACUGGUUGCACAGGGACCUGCGUGUGCGGUUUGUGGACAACAUGUACAAAGGAGGCCAAUAU…	nan nan nan nan nan 0.4196 nan 0.1896 nan nan nan nan nan nan nan nan nan nan 0.1514 nan nan nan 0.313 nan nan nan 0.1074 0.0414 0.0874 nan 0.2488 0.3475 0.3292 0.1296 nan 0.5911 nan nan 0.0439 0.0259 nan 0.2573 nan 0.4185 nan nan nan nan 0.4984 0.663 nan nan nan nan nan 0.5048 0.4952 nan nan 0.0465 0.0574 nan nan nan 0.3446 nan 0.1765 0.0859 nan nan 0.5606 0.7421 0.9136 0.761 nan nan nan nan 0.2…	nan nan nan nan nan 0.5532700421940928 nan 0.25 nan nan nan nan nan nan nan nan nan nan 0.19963080168776373 nan nan nan 0.412710970464135 nan nan nan 0.14161392405063292 0.05458860759493671 0.11524261603375528 nan 0.3280590717299578 0.45820147679324896 0.4340717299578059 0.17088607594936708 nan 0.7794040084388185 nan nan 0.05788502109704642 0.03415084388185654 nan 0.33926687763713076 nan 0.551819…	[0.08824115991592407, 0.07057252526283264, 0.030748039484024048, 0.0925324484705925, 0.05189555510878563, 0.5055676102638245, 0.12809300422668457, 0.22151103615760803, 0.2671142816543579, 0.2165580540895462, 0.3082285523414612, 0.26837584376335144, 0.20856592059135437, 0.23539234697818756, 0.08551658689975739, 0.28827494382858276, 0.5744922757148743, 0.25892379879951477, 0.14677098393440247, 0.16…	[0.12169137597084045, 0.06856910139322281, 0.05300065875053406, 0.05028921365737915, 0.07915323972702026, 0.821942925453186, 0.09767226874828339, 0.3582221567630768, 0.06260833144187927, 0.14456653594970703, 0.12513387203216553, 0.11386784166097641, 0.15455973148345947, 0.11806764453649521, 0.16468796133995056, 0.0773954764008522, 0.12610042095184326, 0.12462010979652405, 0.43696245551109314, 0.1…	0
ENSG00000068650.19	human-mRNA	598	GGGGCUGUGGGAAGGGCCGGGUCACUCGGAUACCAUCAUCCCUGCGGAUGCACCGCCGUACCCUGCUCAUCUGGGAGUGGUUUCCCUGCGGUUACGUCCAAGCCCGCCUGCCCUGUGUGUUGGGGCUGGCUGAGUUUCGGUCUCCCCAUCACCGGCCGCCUCGUGGAGAAGGCAGUGCCACGUGGGAGGACAAGGCCACGCCGGCAGCUUCCAGCCCUGCCGCAGAAGUGCCAGGAUGUCCAUCAGCCACUCGCCAGGGCACGGAGCCGUCAGUCCACUGUUACGGGAGAAUGUUGAUUUCGCGGGUGCGAGGGCCGGGAGACAGAUACUUGGCUGUGAUGAGCAGACAUCCUCUGUCCCCGUGGAGGGGUCAACACCAAGGUGGUGUUCGUGCACCAG…	nan nan nan nan 0.2497 nan nan nan nan nan nan 0.6921 0.7347 nan nan nan 0.3709 0.2212 nan nan nan nan 0.4668 0.6729 0.3214 nan 0.8265 nan nan 0.2238 nan 0.5101 0.4825 0.1808 0.3341 nan 0.4374 0.669 nan 0.0706 0.0533 0.1798 nan nan 0.5757 nan nan 0.3757 nan nan 0.8486 0.4719 0.3542 0.2265 nan 0.275 0.518 nan nan 0.3841 0.3464 0.2137 0.0833 nan nan 0.1811 nan 0.2658 0.5385 nan 0.5701 nan nan nan n…	nan nan nan nan 0.3292457805907173 nan nan nan nan nan nan 0.9125791139240508 0.9687500000000001 nan nan nan 0.4890559071729958 0.2916666666666667 nan nan nan nan 0.6155063291139241 0.8872626582278482 0.4237869198312237 nan 1.0897943037974684 nan nan 0.2950949367088608 nan 0.6726002109704642 0.636207805907173 0.23839662447257384 0.440532700421941 nan 0.576740506329114 0.8821202531645571 nan 0.093…	[0.13206849992275238, 0.08940018713474274, 0.08532503247261047, 0.05547206103801727, 0.29156190156936646, 0.3181533217430115, 0.23406383395195007, 0.45693904161453247, 0.15780138969421387, 0.1899058222770691, 0.34867745637893677, 0.38203325867652893, 0.459860622882843, 0.22619228065013885, 0.13934935629367828, 0.17322516441345215, 0.2067495584487915, 0.20956942439079285, 0.21886539459228516, 0.14…	[0.13117116689682007, 0.05988331139087677, 0.04646879434585571, 0.13298888504505157, 0.6939992904663086, 0.12964355945587158, 0.20292745530605316, 0.1973332166671753, 0.1261446475982666, 0.04421040415763855, 0.08571048080921173, 0.6905096769332886, 0.6489429473876953, 0.08650026470422745, 0.040074318647384644, 0.15892094373703003, 0.465973824262619, 0.40967732667922974, 0.18182162940502167, 0.035…	0
ENSG00000068697.7	human-mRNA	694	GGGGCCGUUUGAGUUUGGCUGCGGGUGGAGAACGUUUGUCAGGGGCCCGGCCAAGAAGGAGGCCCGCCUGUUACGAUGGUGUCCAUGAGUUUCAAGCGGAACCGCAGUGACCGGUUCUACAGCACCCGGUGCUGCGGCUGUUGCCAUGUCCGCACCGGGACGAUCAUCCUGGGGACCUGGUACAUGGUAGUAAACCUAUUGAUGGCAAUUUUGCUGACUGUGGAAGUGACUCAUCCAAACUCCAUGCCAGCUGUCAACAUUCAGUAUGAAGUCAUCGGUAAUUACUAUUCGUCUGAGAGAAUGGCUGAUAAUGCCUGUGUUCUUUUUGCCGUCUCUGUUCUUAUGUUUAUAAUCAGUUCAAUGCUGGUUUAUGGAGCAAUUUCUUAUCAAGUGGGUUGG…	nan nan nan nan 0.4191 0.319 nan nan nan nan nan 1.0 nan nan nan nan nan nan 0.181 nan nan 0.668 nan nan nan nan nan nan 0.4879 nan 0.539 0.3544 0.7481 nan nan nan nan nan nan 0.4997 0.4723 nan nan nan nan 0.2461 0.1294 0.1485 nan nan 0.2457 0.1655 0.5431 0.5504 nan 0.9779 0.5764 nan nan 0.6605 nan nan 0.2379 0.1571 0.1567 nan 0.2943 0.2029 nan nan nan nan 0.361 0.7421 nan 0.588 nan nan nan nan n…	nan nan nan nan 0.5526107594936709 0.42062236286919835 nan nan nan nan nan 1.3185654008438819 nan nan nan nan nan nan 0.23866033755274263 nan nan 0.8808016877637131 nan nan nan nan nan nan 0.64332805907173 nan 0.7107067510548524 0.46729957805907174 0.986418776371308 nan nan nan nan nan nan 0.6588871308016878 0.6227584388185654 nan nan nan nan 0.32449894514767935 0.1706223628691983 0.1958069620253…	[0.1094980537891388, 0.06268128007650375, 0.07600162923336029, 0.060440924018621445, 0.05492698401212692, 0.07663183659315109, 0.2905443608760834, 0.47830891609191895, 0.3946983218193054, 0.3879656195640564, 0.14919644594192505, 0.2499132752418518, 0.1377231478691101, 0.38799625635147095, 0.40290993452072144, 0.3716396689414978, 0.17912954092025757, 0.07318039238452911, 0.1620655506849289, 0.3337…	[0.20949916541576385, 0.10094957798719406, 0.07951620221138, 0.1435995101928711, 0.2063744068145752, 0.35781383514404297, 0.16248929500579834, 0.1631546914577484, 0.13840380311012268, 0.1616053581237793, 0.16564524173736572, 0.981531023979187, 0.2039952129125595, 0.16820301115512848, 0.12497691810131073, 0.11685474216938019, 0.11953642219305038, 0.1539163887500763, 0.34293293952941895, 0.21328538…	0
ENSG00000068971.14	human-mRNA	423	GGGUCUGAGGACUCCCUGCCCAGCCCAGCUUUCACUGGGGGGAGACGAGGAGAGGCAAUGGUGGUCUUGGCAACAGAAUGCUCAGCCCCUCGUGGCAGGACUUGACAAGGGCAAGCUUGACCAGGAAGCUGCCAUCAGGGAUCUUCCCCUGCCCCGCAAAGCUAGGCUCCAGCUGCAGGCGGGCUCCCACCCUCUGCUCCUGGCCUUGGGCAAGGGCACUCAGCGCCUCGCCUGCCCCUGCCUUGGCCAAUGCGAGGUCCUUCCUUAUCCCCACCAUGGGGUCCAUGGUCUAUUUAUUCUCGCCCAGCUCACCCUCUACACAGACACUGUCCUGGGUGCACACUCCUCCCUUCCCUCGCUGUGUACUUCCUUGUCCCCUUUUUAUUUAUUGGGCAGGGG…	nan nan nan nan 0.5509 nan nan 0.4541 nan nan 0.6082 0.2064 nan 0.0924 0.0788 0.0364 nan nan 0.1041 0.3085 0.2206 0.4975 nan 0.0957 0.0635 0.094 0.1023 nan 0.6027 nan nan nan 0.807 0.8424 0.4621 nan nan nan nan nan nan nan 0.3371 nan 0.5992 0.5178 nan 0.5253 nan nan 0.4739 nan 0.7486 nan nan 0.7067 0.8029 0.4875 nan nan nan nan nan nan nan 0.2438 nan nan nan nan 0.3315 0.7146 0.7001 0.9608 0.8353…	nan nan nan nan 0.7263976793248945 nan nan 0.5987605485232068 nan nan 0.801951476793249 0.2721518987341772 nan 0.12183544303797468 0.10390295358649788 0.0479957805907173 nan nan 0.1372626582278481 0.4067774261603376 0.29087552742616035 0.6559862869198313 nan 0.1261867088607595 0.08372890295358651 0.12394514767932491 0.1348892405063291 nan 0.7946993670886077 nan nan nan 1.0640822784810127 1.110759…	[0.18006639182567596, 0.08931947499513626, 0.12825757265090942, 0.3649558126926422, 0.3391033411026001, 0.2921620011329651, 0.30078256130218506, 0.4155465364456177, 0.23442162573337555, 0.3061940670013428, 0.3676660656929016, 0.14630234241485596, 0.32201433181762695, 0.0725928544998169, 0.04721055552363396, 0.07773581147193909, 0.28237804770469666, 0.3447914719581604, 0.06695479154586792, 0.03764…	[0.08730018138885498, 0.04051731526851654, 0.13025034964084625, 0.15669448673725128, 0.3091406226158142, 0.14091673493385315, 0.13956141471862793, 0.6405172348022461, 0.08295559883117676, 0.0731903687119484, 0.6607606410980225, 0.4712463617324829, 0.10071027278900146, 0.23750898241996765, 0.20813962817192078, 0.17596322298049927, 0.12635678052902222, 0.08713197708129883, 0.2502814829349518, 0.134…	0
ENSG00000069248.12	human-mRNA	296	GGGAGACAGCAACCUCCGAAACAUCGUGACCGAGCAGCUGGUAGCCCUGAUCGAUUGCUUCCUGGAUGGUUAUGUUUCUCAGCUUAAGUCUGUGGAUAAAUCCAGUAAUCGGGAAAGAUAUGACAAUCUGGAGAUGGAAUACCUACAGAAAAGAUCAGAUCUCUUAUCUCCUCUUCUUUCACUAGGCCAGUACCUGUGGGCUGCUUCUCUAGCAGAGAAAUACUGUGACUUUGAUAUAUUGGUACAAAUGUGUGAGCAGACUGACAACCAGAGCCGACUCCAGCGCUACAUGACCC	nan nan nan 0.1781 nan 0.0983 0.0917 0.1263 nan 0.7517 0.1158 0.135 0.0905 0.0257 nan 0.0373 0.0498 nan 0.2058 0.1347 0.1693 0.1387 0.1632 nan 0.1058 nan nan nan 1.0 1.0 0.7068 nan 0.2324 nan 0.1047 0.645 nan 0.5329 nan nan nan nan 0.5278 nan 0.069 0.0975 0.0574 nan nan 0.7219 nan 0.0413 nan 0.1401 nan nan nan 0.3078 nan nan 0.2021 0.5254 nan nan nan 0.2126 nan nan nan nan nan 0.331 nan nan nan n…	nan nan nan 0.23483649789029537 nan 0.1296149789029536 0.12091244725738398 0.16653481012658228 nan 0.991165611814346 0.15268987341772153 0.17800632911392408 0.11933016877637131 0.033887130801687766 nan 0.049182489451476796 0.06566455696202532 nan 0.2713607594936709 0.1776107594936709 0.2232331223628692 0.1828850210970464 0.21518987341772156 nan 0.1395042194092827 nan nan nan 1.3185654008438819 1.…	[0.1539876013994217, 0.14109884202480316, 0.058012355118989944, 0.2584993839263916, 0.1899632215499878, 0.1166180670261383, 0.116066113114357, 0.08899648487567902, 0.5068888068199158, 0.34599024057388306, 0.18982255458831787, 0.3576360046863556, 0.04337361827492714, 0.05531954765319824, 0.05547564849257469, 0.04234575852751732, 0.043879665434360504, 0.20768748223781586, 0.18630202114582062, 0.547…	[0.13569502532482147, 0.05397602915763855, 0.0543435662984848, 0.6035069823265076, 0.12265963852405548, 0.4841006398200989, 0.5204877853393555, 0.46172475814819336, 0.21340817213058472, 0.9702016711235046, 0.5534210801124573, 0.44372332096099854, 0.42475229501724243, 0.1323569416999817, 0.13910117745399475, 0.1348581314086914, 0.24224281311035156, 0.16375732421875, 0.8307496309280396, 0.666074156…	0
ENSG00000069275.13	human-mRNA	864	GGGAAGUCCAGUGAAAGGCAAAGGGAAAGUGGGUCGCCCCACAGCUUCAAAGGCAUCAAAGGAAAAGACUCCUUCUCCCAAAGAAGAAGAUGAGGAACCGGAAAGCCCGCCAGAAAAGAAAACAUCUACAAGCCCCCCACCCGAGAAAUCUGGGGAUGAAGGGUCUGAAGAUGAAGCCCCUUCUGGGGAGGAUUAAAAGUGAUGAUGGUCUGGGGAGAGAUUUUAUUAAAAAAAAAAAGAAAAAAAAAGAAAAAAGAGGGAGGAAAAAAAAGAACCUACUUAAGAUAGAACAUGGUUUUGGCUAUGGCUUGACUCAUGGGCUUUCAGUGCUUUUUUCCAUUUGUUGAAAGUAACAUUUCUCUCUCUCUCUCUUUUUUUUUUUUUUUUUUUAAAGCAAAC…	nan nan nan 0.799 0.1736 nan nan 0.0411 0.0433 0.0558 nan nan nan 0.2137 0.6795 0.624 nan nan 0.1262 0.3792 0.5046 0.6203 nan nan nan 0.1345 0.2541 0.2391 nan nan nan nan nan nan 0.504 nan 0.3555 0.0285 0.0362 0.0909 0.3768 0.6811 0.727 nan 0.3547 nan nan 0.3596 0.456 0.7918 0.658 nan nan 0.3146 0.4434 nan 0.7088 0.489 0.5444 0.5862 nan nan 0.4915 0.6099 0.7665 0.6402 nan 1.0 0.2196 nan 0.1247 0.…	nan nan nan 1.0535337552742616 0.2289029535864979 nan nan 0.05419303797468354 0.05709388185654009 0.07357594936708861 nan nan nan 0.2817774261603376 0.8959651898734178 0.8227848101265823 nan nan 0.1664029535864979 0.5 0.6653481012658229 0.8179061181434599 nan nan nan 0.17734704641350213 0.3350474683544304 0.31526898734177217 nan nan nan nan nan nan 0.6645569620253164 nan 0.46875 0.037579113924050…	[0.16529342532157898, 0.12875330448150635, 0.15617415308952332, 0.15006940066814423, 0.14819841086864471, 0.20423419773578644, 0.08099066466093063, 0.06644017994403839, 0.01036733016371727, 0.19719766080379486, 0.20096978545188904, 0.1145256757736206, 0.3974899649620056, 0.2799499034881592, 0.16209068894386292, 0.20716601610183716, 0.1621600240468979, 0.02588905766606331, 0.1374574899673462, 0.11…	[0.15639638900756836, 0.0865667387843132, 0.0704343169927597, 0.41865670680999756, 0.43725019693374634, 0.06014081835746765, 0.08004847913980484, 0.19657184183597565, 0.1633148491382599, 0.43991103768348694, 0.06497874855995178, 0.07167524099349976, 0.05981460213661194, 0.5006895065307617, 0.4153931736946106, 0.49623310565948486, 0.0490536242723465, 0.05752350389957428, 0.4474157989025116, 0.3521…	0
ENSG00000069509.6	human-mRNA	483	GGGAGAAUUGGCCGCUGGCGGUAUCAUGGCGACCCGGAACCCCCCUCCCCAAGACUAUGAAAGUGAUGACGACUCUUAUGAAGUGUUGGAUUUAACUGAGUAUGCAAGAAGACACCAGUGGUGGAAUCGAGUGUUUGGCCACAGUUCGGGACCUAUGGUAGAAAAAUACUCAGUAGCUACCCAGAUUGUAAUGGGUGGCGUUACUGGCUGGUGUGCAGGAUUUCUGUUCCAGAAAGUUGGAAAACUUGCAGCAACUGCAGUAGGUGGUGGCUUUCUUCUUCUUCAGAUUGCUAGUCAUAGUGGCUAUGUGCAGAUUGACUGGAAGAGAGUUGAAAAAGAUGUAAAUAAAGCAAAAAGACAGAUUAAGAAACGAGCGAACAAAGCAGCACCUGAAAUCAA…	nan nan nan 0.2841 nan 0.3585 0.4032 nan nan nan nan 0.0875 0.2039 nan 0.1631 nan nan nan 0.6126 nan nan nan 0.4826 nan 0.3881 0.5052 nan nan nan 0.1809 nan 0.1972 0.1216 0.0765 0.5601 nan nan 1.0 0.5584 0.1522 0.026 0.0255 0.1186 0.0585 0.0308 nan 0.0725 0.0544 0.045 0.2853 0.2772 0.4779 nan 0.788 0.7193 nan 0.5711 nan nan 0.7364 0.6305 0.4047 nan nan nan 0.5759 nan nan 1.0 0.412 nan 0.4562 1.0 …	nan nan nan 0.3746044303797469 nan 0.47270569620253167 0.5316455696202532 nan nan nan nan 0.11537447257383966 0.26885548523206754 nan 0.21505801687763715 nan nan nan 0.8077531645569621 nan nan nan 0.6363396624472574 nan 0.5117352320675106 0.6661392405063291 nan nan nan 0.23852848101265825 nan 0.2600210970464135 0.16033755274261605 0.10087025316455696 0.7385284810126583 nan nan 1.3185654008438819 …	[0.1242867112159729, 0.1952473521232605, 0.13392095267772675, 0.38030821084976196, 0.26297515630722046, 0.20373228192329407, 0.5722683668136597, 0.4529730975627899, 0.3999496102333069, 0.21935443580150604, 0.0675114095211029, 0.06331580877304077, 0.07465159893035889, 0.04928454011678696, 0.1996372938156128, 0.19986215233802795, 0.2761788070201874, 0.21900415420532227, 0.22443464398384094, 0.21027…	[0.1383202224969864, 0.06626254320144653, 0.082508385181427, 0.7948321104049683, 0.10346750915050507, 0.7551063299179077, 0.5796915292739868, 0.17303577065467834, 0.12974491715431213, 0.1426246166229248, 0.12929806113243103, 0.22846931219100952, 0.24477286636829376, 0.2858874201774597, 0.4177907109260559, 0.14208689332008362, 0.1308704912662506, 0.2091619074344635, 0.8028078079223633, 0.234713554…	0
ENSG00000070193.5	human-mRNA	922	GGGAGCGGACUUUCCAAAGGAAGGGGGUGGGAGAUAGGGCCAUACAAAACACCAGCCGCCGUCCCCCAAAACAAAAAGUGACUUUCGGCAGCCUUCAAAUCGGCAGGCACCACUAAAAACAGAAAGGAAGAGAGGGAAGAAAACAACGGCGACUGGGCAGCUGCCUCCACUUCUGACAACUCCAAAGGGAUAUACUUGUAGAAGUGGCUCGCAGGCUGGGGCUCCGCAGAGAGAGACCAGAAGGUGCCAACCGCAGAGGGGUGCAGAUAUCUCCCCCUAUUCCCCACCCCACCUCCCUUGGGUUUUGUUCACCGUGCUGUCAUCUGUUUUUCAGACCUUUUUGGCAUCUAACAUGGUGAAGAAAGGAGUAAAGAAGAGAACAAAGUAACUCCUGGGGGA…	nan nan nan 0.2401 nan 0.3143 nan nan 0.3703 0.4345 nan nan nan 0.125 0.1246 0.2486 0.2977 0.4184 nan nan 0.158 0.2161 nan nan nan nan nan nan nan nan nan 0.2284 nan 0.2149 nan 0.2246 nan nan nan 0.519 0.3798 0.2324 nan 0.5807 0.8272 0.6312 0.3425 0.55 0.3588 0.4134 0.7007 0.1424 0.0597 0.1829 nan 0.0819 0.0642 nan 0.1429 0.1043 nan nan 0.0844 0.0181 0.0231 0.0549 0.1027 0.3255 0.4793 0.5454 0.52…	nan nan nan 0.3165875527426161 nan 0.4144251054852321 nan nan 0.4882647679324895 0.5729166666666667 nan nan nan 0.16482067510548523 0.16429324894514769 0.32779535864978904 0.3925369198312237 0.5516877637130801 nan nan 0.20833333333333334 0.28494198312236285 nan nan nan nan nan nan nan nan nan 0.30116033755274263 nan 0.28335970464135024 nan 0.29614978902953587 nan nan nan 0.6843354430379748 0.5007…	[0.2399342805147171, 0.22902803122997284, 0.17246238887310028, 0.3085671663284302, 0.2161671221256256, 0.2903287410736084, 0.1745380014181137, 0.17721301317214966, 0.2888694107532501, 0.2646542489528656, 0.582378089427948, 0.6287665367126465, 0.2141243815422058, 0.12873145937919617, 0.1037980318069458, 0.3649531602859497, 0.3080124258995056, 0.2182798981666565, 0.29566246271133423, 0.219481468200…	[0.19417288899421692, 0.0800343006849289, 0.10383554548025131, 0.5066613554954529, 0.17345520853996277, 0.7531759738922119, 0.14255282282829285, 0.06287120282649994, 0.552229642868042, 0.45136308670043945, 0.11402109265327454, 0.22857221961021423, 0.12518371641635895, 0.2892987132072449, 0.3928881287574768, 0.664581298828125, 0.8533518314361572, 0.8688647747039795, 0.06886089593172073, 0.04923264…	0
ENSG00000070423.18	human-mRNA	834	GGGAAGAGAAAAUCCAGGCCCUCCCCACCGUCCCCGUCACUGAGGAGCACGUAGGCUCCGGGCUCGAGUGCCCUGUGUGCAAGGACGACUACGCGCUGGGUGAGCGUGUGCGGCAGCUGCCCUGCAACCACCUGUUCCACGACGGCUGCAUCGUGCCCUGGCUGGAGCAGCACGACAGCUGCCCCGUCUGCCGAAAAAGCCUCACGGGACAGAACACGGCCACGAACCCCCCUGGCCUCACUGGGGUGAGCUUCUCCUCCUCGUCGUCAUCGUCCUCCUCCAGCUCGCCCAGCAACGAGAACGCCACAAGCAACUCGUGAGCCCACGUCGGCCGUCGGGAAAGCACGGGGCCUUUCCCACCCACCCUCAGCCAGCGCCACACGGCACCCACAGACUGGG…	nan nan nan 0.1712 0.1482 nan 0.2304 nan 0.2418 0.1767 0.1858 0.2024 nan 0.1058 0.0862 0.0803 nan nan 0.0725 0.0097 0.0185 nan 0.0298 0.0273 0.0189 0.0594 0.2541 0.3326 0.1048 nan nan 0.0213 0.0257 0.0443 0.078 nan nan 0.328 0.3134 0.3425 nan nan 0.4663 nan nan 0.1442 nan 0.076 0.2753 0.2957 nan nan 0.3465 nan nan 0.0469 nan 0.154 0.104 nan nan nan 0.0597 nan 0.1928 nan 0.4308 nan nan nan 0.1161 …	nan nan nan 0.22573839662447256 0.1954113924050633 nan 0.3037974683544304 nan 0.3188291139240506 0.23299050632911392 0.24498945147679324 0.2668776371308017 nan 0.1395042194092827 0.11366033755274262 0.10588080168776372 nan nan 0.09559599156118143 0.012790084388185656 0.024393459915611815 nan 0.03929324894514768 0.03599683544303798 0.024920886075949368 0.07832278481012658 0.3350474683544304 0.4385…	[0.1733114868402481, 0.15045678615570068, 0.2088586688041687, 0.5700441002845764, 0.30106860399246216, 0.29359322786331177, 0.08985340595245361, 0.4082106649875641, 0.1805330067873001, 0.5097673535346985, 0.2601996064186096, 0.2612099051475525, 0.4403979778289795, 0.15777307748794556, 0.07272902131080627, 0.26771584153175354, 0.2192300260066986, 0.19413530826568604, 0.06236138939857483, 0.1156541…	[0.15730378031730652, 0.07419127970933914, 0.07854939997196198, 0.6219915151596069, 0.7253686189651489, 0.09288818389177322, 0.7351866364479065, 0.046649426221847534, 0.764820396900177, 0.5347468852996826, 0.636177122592926, 0.5127042531967163, 0.20936089754104614, 0.3708900213241577, 0.34996339678764343, 0.6766909956932068, 0.043784886598587036, 0.09089247137308121, 0.28624218702316284, 0.215989…	0
ENSG00000071205.12	human-mRNA	838	GGGAGCUGUGACACCUCUUUCACCCGGGUCGUCCCCUUUCCCCUUUUCUCCUCCUGCUACUGUAGCGGACAAGCCACCUGAAAGCAUCCGCAGUCGGAAGGCUCGAGCCGUGUAUCCGUGUGAAGCAGAACACAGCUCGGAAUUAUCUUUUGAAAUAGGAGCAAUUUUUGAGGAUGUACAAACCUCCAGGGAACCUGGCUGGCUAGAAGGGACUCUGAACGGCAAGAGGGGGCUGAUUCCACAGAACUACGUCAAGCUGCUGUAGCUCCUGGCCUCAGAGCCCCUGCUGACCCUGGCACCCAGGGACCUGCCUGGGGGCAGAGAGCUGUCUUCCUCCUCCGAGGCUCUGGGCUGCACCCACAGGUACCUCCACACUUGGGAGUUACCAUCAUCACAGUC…	nan nan nan nan nan nan nan nan nan nan nan nan nan nan nan nan nan nan nan nan nan nan nan nan nan nan nan nan nan nan nan nan nan nan nan nan nan nan nan nan nan nan nan nan nan nan nan nan nan nan nan nan nan nan nan nan nan nan nan nan nan nan nan nan nan nan nan nan nan nan nan nan nan nan nan nan nan nan nan nan nan nan nan nan nan nan nan nan nan nan nan nan nan nan nan nan nan nan nan nan…	nan nan nan nan nan nan nan nan nan nan nan nan nan nan nan nan nan nan nan nan nan nan nan nan nan nan nan nan nan nan nan nan nan nan nan nan nan nan nan nan nan nan nan nan nan nan nan nan nan nan nan nan nan nan nan nan nan nan nan nan nan nan nan nan nan nan nan nan nan nan nan nan nan nan nan nan nan nan nan nan nan nan nan nan nan nan nan nan nan nan nan nan nan nan nan nan nan nan nan nan…	[0.18490056693553925, 0.2308785617351532, 0.12399362772703171, 0.377570241689682, 0.14134761691093445, 0.23309464752674103, 0.35320281982421875, 0.23576927185058594, 0.3188716769218445, 0.4342043697834015, 0.3730894923210144, 0.11600816249847412, 0.4280422031879425, 0.11277800798416138, 0.130677729845047, 0.2308492660522461, 0.313740611076355, 0.2384415864944458, 0.7595446109771729, 0.40791529417…	[0.1635737121105194, 0.0650550127029419, 0.06609734892845154, 0.6526570916175842, 0.10235389322042465, 0.38512223958969116, 0.10542815923690796, 0.10478650033473969, 0.14133058488368988, 0.09126565605401993, 0.946325421333313, 0.7378590703010559, 0.7575987577438354, 0.5090489983558655, 0.28463926911354065, 0.13109029829502106, 0.40645933151245117, 0.15773648023605347, 0.18206223845481873, 0.09832…	0
ENSG00000071462.13	human-mRNA	774	GGGUGUGCUGCUGAGGCGUGAGAAUGGCGUCCCGCGGCCGGCGUCCGGAGCAUGGCGGACCCCCAGAGCUGUUUUAUGACGAGACAGAAGCCCGGAAAUACGUUCGCAACUCACGGAUGAUUGAUAUCCAGACCAGGAUGGCUGGGCGAGCAUUGGAGCUUCUUUAUCUGCCAGAGAAUAAGCCCUGUUACCUGCUGGAUAUUGGCUGUGGCACUGGGCUGAGUGGAAGUUAUCUGUCAGAUGAAGGGCACUAUUGGGUGGGCCUGGAUAUCAGCCCUGCCAUGCUGGAUGAGGCUGUGGACCGAGAGAUAGAGGGAGACCUGCUGCUGGGGGAUAUGGGCCAGGGCAUCCCAUUCAAGCCAGGCACAUUUGAUGGUUGCAUCAGCAUUUCUGCUGUGC…	nan nan nan nan nan nan nan 0.1279 nan nan 0.4976 nan nan 0.5872 nan nan 0.2179 nan nan nan 0.9375 nan 0.7234 0.5231 nan nan nan 0.8237 nan nan 0.0994 0.0678 0.2642 nan 0.4309 nan nan 0.1127 0.1362 nan nan 0.4748 nan nan 0.0739 0.0971 nan nan 0.6544 nan 0.7159 0.5515 nan nan nan 0.1843 nan nan 0.4862 0.0827 0.0916 0.0567 0.0824 0.1217 0.3759 nan 0.8058 nan 0.1596 nan nan nan nan nan nan 0.4799 na…	nan nan nan nan nan nan nan 0.16864451476793252 nan nan 0.6561181434599156 nan nan 0.7742616033755275 nan nan 0.2873154008438819 nan nan nan 1.2361550632911393 nan 0.9538502109704642 0.6897415611814346 nan nan nan 1.0861023206751055 nan nan 0.13106540084388188 0.0893987341772152 0.3483649789029536 nan 0.5681698312236287 nan nan 0.14860232067510548 0.1795886075949367 nan nan 0.6260548523206751 nan…	[0.14344273507595062, 0.19563108682632446, 0.20303641259670258, 0.4561804533004761, 0.23056982457637787, 0.3472056984901428, 0.17693300545215607, 0.17829935252666473, 0.0851510688662529, 0.07958557456731796, 0.16741889715194702, 0.2803771495819092, 0.21192950010299683, 0.29119163751602173, 0.3057500720024109, 0.19921936094760895, 0.19750136137008667, 0.20213639736175537, 0.48958873748779297, 0.18…	[0.11241482198238373, 0.054030731320381165, 0.19296923279762268, 0.1772955060005188, 0.2843461036682129, 0.17549090087413788, 0.16232284903526306, 0.4123130738735199, 0.09177093207836151, 0.1752559244632721, 0.4530404806137085, 0.11155787855386734, 0.0910082533955574, 0.8323404788970947, 0.08838275074958801, 0.0998821035027504, 0.363248735666275, 0.22066882252693176, 0.13427577912807465, 0.124268…	13.44
ENSG00000071859.15	human-mRNA	1002	GGGAAGGAGCGGGAGAAGCAGCUGGCCAAGAAGGAGCAGUCCAAGGAGCUGCAGAUGAAGCUGGAGAAGCUUCGAGAGAAGGAGCGUAAGAAGGAAGCCAAGCGGAAGAUCUCCAGCCUGUCCUUCACCCUGGAGGAGGAAGAAGAGGGAGGCGAGGAGGAAGAGGAGGCGGCCAUGUAUGAGGAGGAGAUGGAAAGGGAAGAGAUCACCACGAAGAAGAGAAAACUGGGGAAGAACCCAGACGUUGACACAAGCUUCUUGCCUGAUCGAGACCGUGAGGAGGAGGAGAAUCGGCUUCGGGAAGAGCUGCGGCAGGAGUGGGAAGCCAAGCAGGAGAAGAUCAAGAGUGAGGAGAUCGAGAUCACCUUCAGCUACUGGGAUGGCUCUGGGCACCGGCGG…	nan nan nan 0.4259 0.3835 nan nan 0.2397 nan 0.2822 nan nan nan 0.5534 nan 0.9357 0.5802 nan 0.2649 0.3512 nan 0.1842 nan nan nan 0.2249 0.3005 0.6651 0.7158 nan 0.7059 0.5393 nan nan 0.397 nan 0.3364 0.3373 nan nan 0.167 0.2413 0.7031 0.7985 nan nan 0.5332 nan 0.1051 nan nan 0.1871 0.7389 nan 0.8068 nan nan 0.5088 0.5444 nan 0.0295 nan nan nan 0.4218 nan 0.593 0.5181 nan 0.0351 nan nan 0.0477 na…	nan nan nan 0.5615770042194093 0.5056698312236287 nan nan 0.3160601265822785 nan 0.3720991561181435 nan nan nan 0.7296940928270043 nan 1.2337816455696202 0.7650316455696203 nan 0.34928797468354433 0.46308016877637137 nan 0.24287974683544306 nan nan nan 0.29654535864978904 0.3962289029535865 0.8769778481012659 0.9438291139240507 nan 0.9307753164556962 0.7111023206751055 nan nan 0.5234704641350212 …	[0.2808201014995575, 0.25305765867233276, 0.2532937526702881, 0.3297695517539978, 0.35071516036987305, 0.32361504435539246, 0.20680734515190125, 0.26074016094207764, 0.1438124179840088, 0.25252461433410645, 0.08304944634437561, 0.25522127747535706, 0.08577441424131393, 0.5002526044845581, 0.2054532766342163, 0.30893003940582275, 0.19187109172344208, 0.15625295042991638, 0.17646382749080658, 0.232…	[0.1976962387561798, 0.13221630454063416, 0.1536853313446045, 0.532537579536438, 0.5450998544692993, 0.09335137903690338, 0.06822814047336578, 0.4811463952064514, 0.11728747934103012, 0.26356422901153564, 0.1183471754193306, 0.06339751183986664, 0.08340176939964294, 0.5659744143486023, 0.10303445160388947, 0.6637057065963745, 0.6789948344230652, 0.133976548910141, 0.2905702590942383, 0.5103768110…	0
ENSG00000072071.17	human-mRNA	777	GGGCCCAGAAGAUCAAGAGUGGGGAGAACGCGGCCAACAUCGCCAGCGAGCUGGCCCGACACACCCGGGGCUCCAUCUACGCGGGGGACGUCUCCUCCUCUGUGAAGCUGAUGGAGCAGCUGCUGGACAUCCUGGAUGCCCAGCUGCAGGCCCUGCGGCCCAUCGAGCGCGAGUCAGCCGGCAAGAACUACAACAAGAUGCACAAGCGAGAGAGAACUUGUAAGGAUUAUAUCAAGGCCGUGGUGGAGACAGUGGACAAUCUGCUCCGGCCAGAAGCUCUGGAGUCCUGGAAGGACAUGAAUGCCACGGAGCAGGUGCACACGGCCACCAUGCUCCUCGACGUCCUGGAGGAGGGCGCCUUCCUGCUGGCCGACAAUGUCAGGGAGCCUGCCCGCUUCC…	nan nan nan 0.0584 0.0934 0.1211 0.1779 nan 0.4882 0.4251 nan 0.6646 nan 0.5246 0.5743 0.4399 nan 0.4481 nan nan nan nan nan nan 0.2514 nan 0.5435 0.7074 0.438 nan 0.3653 nan nan 0.0497 0.1729 0.3035 0.3644 0.4111 0.6241 nan 0.3823 nan 0.2522 0.2892 0.4701 nan 0.2224 nan 0.4858 nan 0.1844 nan nan nan 0.0735 0.0715 0.0749 nan 0.9874 0.6559 0.7513 0.5335 0.5893 0.1491 0.0858 0.0462 nan nan nan nan …	nan nan nan 0.0770042194092827 0.12315400843881857 0.1596782700421941 0.23457278481012658 nan 0.6437236286919832 0.5605221518987342 nan 0.8763185654008439 nan 0.6917194092827004 0.7572521097046414 0.5800369198312236 nan 0.5908491561181435 nan nan nan nan nan nan 0.33148734177215194 nan 0.7166402953586498 0.9327531645569621 0.5775316455696203 nan 0.4816719409282701 nan nan 0.06553270042194094 0.22…	[0.07314497977495193, 0.1307157725095749, 0.09419918060302734, 0.07015083730220795, 0.08971624821424484, 0.06985308229923248, 0.4366070628166199, 0.2592650353908539, 0.3746136724948883, 0.47767823934555054, 0.17322887480258942, 0.4650018811225891, 0.5722570419311523, 0.3991814851760864, 0.5055806636810303, 0.2946586608886719, 0.2238856703042984, 0.4450102150440216, 0.36705562472343445, 0.44568902…	[0.09459107369184494, 0.050054147839546204, 0.14248210191726685, 0.22156885266304016, 0.13838404417037964, 0.2520679831504822, 0.824131190776825, 0.05852964520454407, 0.7538505792617798, 0.7795314788818359, 0.05535192787647247, 0.7189276218414307, 0.16625730693340302, 0.6372722387313843, 0.7053583860397339, 0.7733154892921448, 0.05096709728240967, 0.8529747724533081, 0.1661374419927597, 0.1344382…	0
ENSG00000072201.14	human-mRNA	675	GGGUAAAACUGGUGCGCAAGGUGGAUGAGCCUGGGGUUUUCAUCUUCAAUGUGCUGGAUGGCGGUGUGGCAUAUCGACAUGGUCAGCUUGAGGAGAAUGACCGUGUGUUAGCCAUCAAUGGACAUGAUCUUCGAUAUGGCAGCCCAGAAAGUGCGGCUCAUCUGAUUCAGGCCAGUGAAAGACGUGUUCACCUCGUCGUGUCCCGCCAGGUUCGGCAGCGGAGCCCUGACAUCUUUCAGGAAGCCGGCUGGAACAGCAAUGGCAGCUGGUCCCCAGGGCCAGGGGAGAGGAGCAACACUCCCAAGCCCCUCCAUCCUACAAUUACUUGUCAUGAGAAGGUGGUAAAUAUCCAAAAAGACCCCGGUGAAUCUCUCGGCAUGACCGUCGCAGGGGGAGCAU…	nan nan nan nan 0.3939 0.3704 0.4769 0.1868 0.0825 nan nan nan nan nan 0.9921 nan 0.5216 0.2819 0.2253 nan nan nan nan nan 0.0581 nan nan 0.1751 nan 0.0414 0.0805 nan nan nan nan nan nan nan nan nan 0.3207 0.2421 nan 0.2095 nan nan 0.1895 0.4943 0.439 nan nan nan nan 0.109 nan nan nan 0.7915 nan nan nan 0.4664 nan nan nan nan nan nan nan 0.1751 0.3453 nan 0.2246 nan 0.171 nan 0.3251 0.7717 0.1355…	nan nan nan nan 0.519382911392405 0.48839662447257387 0.6288238396624473 0.24630801687763715 0.10878164556962026 nan nan nan nan nan 1.3081487341772153 nan 0.6877637130801687 0.3717035864978903 0.2970727848101266 nan nan nan nan nan 0.07660864978902954 nan nan 0.23088080168776373 nan 0.05458860759493671 0.10614451476793249 nan nan nan nan nan nan nan nan nan 0.4228639240506329 0.31922468354430383…	[0.18677087128162384, 0.08821247518062592, 0.12640291452407837, 0.6074371933937073, 0.39850860834121704, 0.15641382336616516, 0.0979265421628952, 0.16608090698719025, 0.1397070735692978, 0.2535516619682312, 0.216887429356575, 0.18364457786083221, 0.6081122159957886, 0.35920992493629456, 0.318368136882782, 0.09449812769889832, 0.32863378524780273, 0.2542443573474884, 0.4690929055213928, 0.43836987…	[0.08179611712694168, 0.056376829743385315, 0.06252569705247879, 0.2054785192012787, 0.5535324811935425, 0.5923215746879578, 0.6653178930282593, 0.47278738021850586, 0.36077985167503357, 0.10850410908460617, 0.0835721343755722, 0.10865085572004318, 0.19602596759796143, 0.1908622831106186, 0.8626168966293335, 0.17217674851417542, 0.736935019493103, 0.5862439870834351, 0.56181800365448, 0.103928893…	0
ENSG00000072657.10	human-mRNA	583	GGGUGGACGGCGAGCUGGGGGAGCAAGAGGAGGAGAAGAAAAAGAAGAAGAAAAAGAAGAGGAAGAAGAAGAAGGAGGAGGAGGAGGAGGAGGAGGGGGCCGAGAAGAGCAGCUCACCCUUCGCAGCCGCGAUGGGGGAAGACGACGCCGCGCUUCGGGCUGGCAGCAGGGGGCUCUCCGACCCGUGGGCAGACUCAGUGGGAGUGCGACCCCGCACCACGGAGCGCCACAUCGCCGUACACAAGCGGCUUGUGCUGGCCUUCGCUGUGUCCCUCGUGGCAUUGCUCGCGGUCACAAUGCUCGCUGUGCUGCUCAGCCUGCGCUUCGACGAGUGCGGGGCGAGUGCCACGCCAGGCGCCGACGGUGGCCCCUCAGGCUUUCCGGAGCGCGGCGGCAACG…	nan nan nan nan nan nan 0.3383 0.3718 nan nan 0.2133 nan 0.3944 nan 0.2211 nan nan nan nan nan nan 0.3798 nan 0.408 0.5078 0.4277 nan 0.49 nan nan 0.3509 nan nan 0.3603 nan 0.5278 0.5043 nan nan nan nan nan nan nan 0.5457 0.5768 nan 0.6205 0.562 nan nan nan nan nan nan nan 0.4767 1.0 nan 0.3996 nan nan 0.4684 0.5754 nan 0.628 0.5681 nan 0.6525 0.5369 nan 1.0 0.5197 nan nan 0.4137 nan nan 0.4763 n…	nan nan nan nan nan nan 0.44607067510548526 0.4902426160337553 nan nan 0.28125 nan 0.520042194092827 nan 0.2915348101265823 nan nan nan nan nan nan 0.5007911392405063 nan 0.5379746835443038 0.6695675105485233 0.5639504219409284 nan 0.6460970464135021 nan nan 0.46268459915611815 nan nan 0.47507911392405067 nan 0.695938818565401 0.6649525316455697 nan nan nan nan nan nan nan 0.7195411392405063 0.76…	[0.2002955675125122, 0.20593391358852386, 0.20043432712554932, 0.476712703704834, 0.27415937185287476, 0.23416516184806824, 0.25192761421203613, 0.2025999128818512, 0.15762649476528168, 0.26465582847595215, 0.2275363802909851, 0.08456581830978394, 0.26677805185317993, 0.09397457540035248, 0.26528966426849365, 0.4058118462562561, 0.06968323886394501, 0.0180768221616745, 0.02599991112947464, 0.0812…	[0.07372504472732544, 0.0793251097202301, 0.16048964858055115, 0.11731137335300446, 0.10726945847272873, 0.05277170240879059, 0.4223279058933258, 0.33299535512924194, 0.11867686361074448, 0.10686355829238892, 0.2941218614578247, 0.06255151331424713, 0.5943558812141418, 0.08802393078804016, 0.3397935628890991, 0.08762520551681519, 0.06477586179971695, 0.0568491667509079, 0.062423139810562134, 0.06…	0
ENSG00000072954.7	human-mRNA	707	GGGCCUGGACAAGUUGCCUUCCUCCUCUGAGCUUGGCGCUCCCCAUCUGUAUAGUGGAGACCCUUGGCCCCCCUCUGUACGGAAGGGCCGAUGCGAAGCUGCAGUUAAAAAAGGCUCACAUGCUCCUAGCCUCGUGCAGUCAGGAGGGGAGACCAGGACAGUUGGAAAUUAUGAUUGCAAAUGGCUUUGCAUUUUAGAUCAUUCGUGUGUGUGGAUCAGAGAAACGCACAAGUUCCCUGGCACAAAGGAAGCCCUCAGUAGACACGUCUAGGGCAGGCUUGAGAGAUCAGAUGGCGUGAAAGGCUUGUGAUCUGUUCGUCUCAGGCUCCCCCUAAACCAAAGAAAUGGAAACAGCUGGUUGGGGUUCCACGAUCCAGCUCUAUCAAGGGGCUCUGAGUG…	nan nan nan 0.1663 0.047 nan nan nan 0.328 0.4428 0.5167 0.59 nan nan nan nan 0.1022 0.0437 nan nan 0.3432 0.1836 nan 0.124 0.0727 nan 0.059 nan nan 0.4844 nan 0.0714 nan nan nan nan 0.3312 nan 0.0351 nan 0.0538 0.0209 0.11 0.0212 0.2669 nan 0.0571 nan nan nan 0.3078 nan 0.6115 nan nan nan nan 0.7179 nan 0.4544 0.4234 0.196 0.4267 nan nan nan nan 0.048 0.5489 0.0891 0.174 0.0604 0.0958 nan 0.4731…	nan nan nan 0.21927742616033757 0.061972573839662454 nan nan nan 0.4324894514767933 0.583860759493671 0.6813027426160339 0.7779535864978903 nan nan nan nan 0.13475738396624473 0.05762130801687764 nan nan 0.4525316455696203 0.24208860759493675 nan 0.16350210970464135 0.09585970464135021 nan 0.07779535864978902 nan nan 0.6387130801687764 nan 0.09414556962025318 nan nan nan nan 0.43670886075949367 n…	[0.09575723856687546, 0.08964116871356964, 0.10332155227661133, 0.06940968334674835, 0.10703164339065552, 0.14625447988510132, 0.12680301070213318, 0.08243373036384583, 0.194815531373024, 0.11951704323291779, 0.24860669672489166, 0.5065228343009949, 0.35176974534988403, 0.5366074442863464, 0.5068728923797607, 0.5529104471206665, 0.05026508867740631, 0.06536325812339783, 0.30924469232559204, 0.468…	[0.1121564656496048, 0.043244361877441406, 0.09467820823192596, 0.3202294707298279, 0.2272641509771347, 0.11600665748119354, 0.08682020008563995, 0.06263601034879684, 0.5643664002418518, 0.5528233051300049, 0.6225231885910034, 0.5857278108596802, 0.10393720120191574, 0.1395740509033203, 0.1628892421722412, 0.1743592619895935, 0.3216599225997925, 0.23854416608810425, 0.11412413418292999, 0.1281953…	0
ENSG00000073861.3	human-mRNA	844	GGGGCCAGGCGAAGGAUGUGGUUCCCCAGGCUUACUGGCUGGGGGCCCCCCGGGACCACAGCUAUGAGGCUGAGUUUCGAGCAGUCAGCAUGAAGCCUGCAUUCUUGCCCUCUGCCCCUGGGCCCACCAUGUCCUACUACCGAGGCCAGGAGGUCCUGGCACCUGGAGCUGGCUGGCCUGUGGCACCCCAGUACCCUCCCAAGAUGGGCCCGGCCAGCUGGUUCCGCCCUAUGCGGACUCUGCCCAUGGAACCCGGCCCUGGAGGCUCAGAGGGACGGGGACCAGAGGACCAGGGUCCCCCCUUGGUGUGGACUGAGAUUGCCCCCAUCCGGCCGGAAUCCAGUGAUUCAGGACUGGGCGAAGGAGACUCUAAGAGGAGGCGCGUGUCCCCCUAUCCUU…	nan nan nan nan 0.1171 1.0 0.272 nan nan 0.4797 nan 0.3929 0.4614 nan nan 0.21 nan nan nan nan nan nan nan 0.1323 0.0387 0.1577 0.0743 0.0688 nan nan 0.1833 nan nan 0.5372 0.5407 nan nan nan 0.0868 nan nan nan nan nan nan 0.0646 0.0161 0.0419 0.1306 0.1005 0.1261 nan nan nan 0.1798 0.086 0.1627 0.4291 0.1066 0.1392 nan 0.0802 nan 0.8333 nan nan 0.7297 nan nan 0.0616 nan nan 1.0 nan nan nan nan 0.…	nan nan nan nan 0.15440400843881857 1.3185654008438819 0.3586497890295359 nan nan 0.6325158227848102 nan 0.5180643459915613 0.6083860759493671 nan nan 0.27689873417721517 nan nan nan nan nan nan nan 0.17444620253164558 0.05102848101265823 0.20793776371308018 0.09796940928270044 0.09071729957805907 nan nan 0.24169303797468356 nan nan 0.7083333333333334 0.7129483122362869 nan nan nan 0.114451476793…	[0.07393030822277069, 0.06283756345510483, 0.07040902972221375, 0.09348209947347641, 0.16209422051906586, 0.1073007881641388, 0.20012786984443665, 0.12006682902574539, 0.191958487033844, 0.27511918544769287, 0.3407522439956665, 0.2018900066614151, 0.26403412222862244, 0.3399895429611206, 0.13085117936134338, 0.2668780982494354, 0.2531927824020386, 0.26223433017730713, 0.4044472575187683, 0.187053…	[0.16120171546936035, 0.08631705492734909, 0.047495096921920776, 0.15187105536460876, 0.3649047017097473, 0.2987513542175293, 0.40801310539245605, 0.0650939792394638, 0.21391190588474274, 0.6615543365478516, 0.16026091575622559, 0.6616730690002441, 0.7726389169692993, 0.1027040109038353, 0.07324400544166565, 0.5231822729110718, 0.1166158989071846, 0.1502840518951416, 0.13955645263195038, 0.163919…	0
ENSG00000074590.14	human-mRNA	538	GGGUCCCUCCUGCAAACACCACCGCCUCCCCUGCCACCGCCGCCACCUCGCCCGACGCUCCACAGCUCGCCGCGGCCGGGGGGCGGUGCGCGGACCGUGCGCGCCGCGGGCGCCAGAUGUGCAGUCCCCGCCGCCGCCAGUGACCGAGCCGCAGUCCGAGCGGUAUCGGGCCGCCUCCCUGAUGCUGCGGGGGCGACCUUGAGCGUACAGCGGCUUCCCUCGGUGGGGACCCCGACAUCCCAGCGCUGUGCCCGGUCUUGCCCUCUGUAGCCCGGCUCGCCCCGCGCUUGGACAUGGAAGGGGCCGCCGCGCCUGUGGCGGGGGACCGCCCCGACUUGGGGCUGGGGGCGCCGGGCUCUCCCCGAGAGGCGGUGGCGGGGGCGACUGCAGCCCUGGAGC…	nan nan nan nan 0.0919 0.0714 0.0645 nan 0.4113 0.147 nan nan 0.4603 0.7066 0.6958 0.8634 0.8921 0.9304 0.6042 0.1549 0.2325 0.1772 0.1192 nan 0.1868 0.0762 nan 0.0448 0.072 0.0965 0.1571 nan nan 0.1273 0.0714 0.3123 0.3124 0.2441 nan 0.0905 0.1028 nan 0.3311 0.2542 0.434 0.4086 0.146 nan 0.6292 nan 0.2723 0.1384 0.1409 nan 0.2707 0.2575 nan 0.1766 nan 0.3024 0.8825 0.5472 0.777 0.7131 nan 0.2719…	nan nan nan nan 0.12117616033755274 0.09414556962025318 0.08504746835443039 nan 0.5423259493670887 0.19382911392405064 nan nan 0.6069356540084389 0.931698312236287 0.917457805907173 1.1384493670886076 1.176292194092827 1.2267932489451479 0.7966772151898734 0.20424578059071732 0.30656645569620256 0.23364978902953587 0.1571729957805907 nan 0.24630801687763715 0.1004746835443038 nan 0.05907172995780…	[0.15492376685142517, 0.08306862413883209, 0.14434801042079926, 0.3699740767478943, 0.2641039490699768, 0.13385266065597534, 0.1288948655128479, 0.314334511756897, 0.05970073863863945, 0.0649157464504242, 0.26889941096305847, 0.23027585446834564, 0.20466023683547974, 0.16263067722320557, 0.6763943433761597, 0.182874858379364, 0.22421866655349731, 0.23353011906147003, 0.12159553170204163, 0.084054…	[0.07843029499053955, 0.053480565547943115, 0.05983627587556839, 0.10002757608890533, 0.2563321590423584, 0.41704443097114563, 0.24329283833503723, 0.07267127186059952, 0.2482125163078308, 0.16012674570083618, 0.07861019670963287, 0.07300395518541336, 0.42150378227233887, 0.3921305239200592, 0.5698275566101074, 0.5531638860702515, 0.5305992364883423, 0.6965819597244263, 0.43623119592666626, 0.308…	0
ENSG00000074695.6	human-mRNA	975	GGGACGAGUGCUGUGUGUGCAAACAGUCUGGCGUUGCUUUUUAUGUUGAUAUUUAUCCUAGAACACUGAAAGAGAAUAUGCCAGUGAUAACUCACUUUACUUCAGUCAUUUCAACACAGAAAAUGCUUCUCUAGCAUUUUUCUUUUGUAGUGUUAACAUUUUGAAAUUCAUGUUUCAGAGGCUUCAUCAUCACAGAAUUUACUCUUGCUCCAUGAAAAAAAAUUAAAUACCUUCAGAGGAAUAUUUAAGUUGUAAACUAUGAAACUUGAGAAAUCCUCUUGAGAUAAAAGGCUGCCAAAUCCAGUAUUAUAAAGUCCAUGGUCAUAUGUGCCUGUGCAUUAAAGGAAUACCAGAUCUAUGCAGUAUACAUUUUUCAGGCUGAAAUUCAAGGGGAAUCAU…	nan nan nan 0.2058 0.293 nan 0.3772 nan nan nan 0.144 nan nan nan nan nan nan nan nan 1.0 0.5732 0.4927 0.623 0.7737 0.557 nan nan 0.1405 nan nan nan 0.1473 nan nan nan nan 0.2004 nan nan nan nan nan 0.1988 nan nan nan nan nan 0.3693 nan 0.5731 nan nan nan 0.3187 nan 0.5001 0.4488 nan 0.5394 nan 0.3077 0.2129 0.3071 0.237 0.4043 nan nan 0.3024 0.2816 0.2634 nan 0.3611 nan 0.5165 0.3473 nan 0.3709…	nan nan nan 0.2713607594936709 0.38633966244725737 nan 0.49736286919831224 nan nan nan 0.18987341772151897 nan nan nan nan nan nan nan nan 1.3185654008438819 0.7558016877637131 0.6496571729957806 0.8214662447257385 1.0201740506329116 0.7344409282700423 nan nan 0.18525843881856544 nan nan nan 0.19422468354430378 nan nan nan nan 0.26424050632911394 nan nan nan nan nan 0.26213080168776376 nan nan na…	[0.1998644471168518, 0.15943372249603271, 0.11347360908985138, 0.11384867131710052, 0.18881747126579285, 0.12385310977697372, 0.23601391911506653, 0.31870633363723755, 0.2934112548828125, 0.14239490032196045, 0.1762637495994568, 0.06891670823097229, 0.08086436986923218, 0.08801472187042236, 0.04419124871492386, 0.02337624505162239, 0.1366368681192398, 0.2776137888431549, 0.371223509311676, 0.1500…	[0.2134554535150528, 0.1300363540649414, 0.10989546775817871, 0.48299917578697205, 0.681623101234436, 0.11680072546005249, 0.9022461175918579, 0.11338967084884644, 0.08403673022985458, 0.14636990427970886, 0.4632072448730469, 0.07491683214902878, 0.1145731657743454, 0.13135823607444763, 0.14916011691093445, 0.15997391939163208, 0.1492529809474945, 0.09625411778688431, 0.1276627779006958, 0.649199…	0
ENSG00000075073.16	human-mRNA	980	GGGCCCACGACCUCCCUCUCCACGAGAGUCAACAGGUGUCACACUAAGGAGACUUUGUUCAUGGCUGGGGACACAGCCCCCUCCGAGGCUACCAGUGGGGAGGCGGGGCGUCCCCAGGAUGGAUCAGGGCUAUGGUUUGGGUAUGGUUUGCUUGCCCCCACCAAAACUCAUGUUGAAAUUUGAUCCCAAUGUGGCAGUGUUGGGAGGUAGGGGUUAGUGGGAGGUGUUUGGGUAUUGGGGAUGGAUCCCUUAUGAAUAGAUUAAUGCCUUCCAGUUGAAGUGAAUCAUCACUCUUGUGGGAAUGGACUAGUUCCCAAAAUAACAAGUUGUUAGAAAGAGUGUGGUGUCCUCAGUUUCCCUGUCUUGCUUCCUCUCUCACCAUGUGAUCUCUUUGCACAC…	nan nan nan 0.1037 0.0779 0.0677 0.2341 0.6431 nan 0.3008 0.1501 0.0651 nan 0.146 0.0632 0.0627 nan 0.1234 nan 0.0453 0.1088 0.349 0.6049 nan 0.527 nan 0.4952 nan nan 0.3432 0.4004 0.7452 0.2882 0.3825 nan nan nan nan nan 0.175 0.338 0.2459 0.5252 0.5526 nan 0.8143 1.0 nan nan 0.5589 nan 0.6277 0.4317 nan nan nan nan nan nan 0.1374 0.2277 nan nan nan 0.0469 nan nan nan nan nan 0.1071 0.142 1.0 0.…	nan nan nan 0.13673523206751056 0.1027162447257384 0.0892668776371308 0.30867616033755274 0.8479694092827005 nan 0.3966244725738397 0.19791666666666669 0.08583860759493672 nan 0.19251054852320676 0.08333333333333334 0.0826740506329114 nan 0.16271097046413502 nan 0.059731012658227854 0.14345991561181434 0.46017932489451474 0.7976002109704642 nan 0.6948839662447258 nan 0.6529535864978903 nan nan 0.…	[0.10779416561126709, 0.18199971318244934, 0.11876489222049713, 0.040162257850170135, 0.15405046939849854, 0.041308097541332245, 0.41251280903816223, 0.2000543624162674, 0.301676869392395, 0.4022655487060547, 0.027693822979927063, 0.08088469505310059, 0.18576037883758545, 0.07402121275663376, 0.06421217322349548, 0.03342195972800255, 0.13800667226314545, 0.09798403084278107, 0.09572102874517441, …	[0.12167220562696457, 0.07953010499477386, 0.2183900773525238, 0.2627473771572113, 0.2049466371536255, 0.26669085025787354, 0.8497611880302429, 0.8440561890602112, 0.14600835740566254, 0.8371042013168335, 0.313054621219635, 0.2617662250995636, 0.16350504755973816, 0.2888436019420624, 0.20080113410949707, 0.254332572221756, 0.15955844521522522, 0.47471868991851807, 0.13778817653656006, 0.245589688…	6.53
ENSG00000075568.17	human-mRNA	878	GGGUGGGAGCCAUUUCGAAGGCGGCUAUCCUUUGAGGCCUCGAACCCGCCCUUCGAUGUGGGAAGGCCAUUUGAUCUCAGGAGAAUCGUUGGUAUUUCAUCUGAAGGAAACUUGAACACACUCAGCUGUGACCCCGGUCACAGUAGGGGGUUCUGUGGAGCAGGCGGUUCAUCAUCCCGACCCAGUGCCGGGAGUCAUAAGCAGUGUGGCCCAUCGGUCCACCCACACAGCAGUCACAGCAAUAGAAACUCAGCUGACGUGGAAAACGUCAGAGCCAAAAACAGUUCAAGUACCUCUAGUAGGACUUCUGCUCAAGCAGCUUCUUCACAGUCUGCUAACAAAACAAGCCCCCUUGUCUUAGAUUCGAACACAGUGACUCAAGGUCAUACAGCGGGCAGA…	nan nan nan nan nan nan nan 0.4618 nan 0.3532 0.3009 0.3441 nan nan nan 0.1096 nan 0.2047 0.272 nan nan 0.1995 nan nan 0.518 nan 0.7265 nan 0.3357 0.3453 nan nan nan nan 0.4202 nan nan 0.4089 0.1795 nan 0.451 nan 0.5573 0.7472 0.9519 0.0457 0.0464 nan 0.3155 0.1178 0.1409 nan nan 0.2239 nan 0.3814 nan nan nan nan nan nan 0.8627 0.7736 nan nan 0.1464 0.1445 0.503 nan nan nan nan 0.9997 nan 0.3134 …	nan nan nan nan nan nan nan 0.6089135021097046 nan 0.46571729957805913 0.39675632911392406 0.4537183544303798 nan nan nan 0.14451476793248946 nan 0.26991033755274263 0.3586497890295359 nan nan 0.26305379746835444 nan nan 0.6830168776371308 nan 0.9579377637130803 nan 0.44264240506329117 0.45530063291139244 nan nan nan nan 0.5540611814345993 nan nan 0.5391613924050633 0.2366824894514768 nan 0.59467…	[0.21840128302574158, 0.16203874349594116, 0.1380050778388977, 0.3829309940338135, 0.1445605605840683, 0.21990126371383667, 0.10586870461702347, 0.35300543904304504, 0.2343234121799469, 0.19302332401275635, 0.12485796958208084, 0.6908206343650818, 0.4463326930999756, 0.4875847101211548, 0.4491924047470093, 0.25682249665260315, 0.28259438276290894, 0.3282347619533539, 0.23575609922409058, 0.287225…	[0.10107127577066422, 0.05583807826042175, 0.2300722599029541, 0.23625242710113525, 0.21901218593120575, 0.07638705521821976, 0.06709472835063934, 0.7591708898544312, 0.13732631504535675, 0.3093888759613037, 0.348568320274353, 0.6540252566337585, 0.15879806876182556, 0.17446368932724, 0.14107055962085724, 0.44721031188964844, 0.16699929535388947, 0.5862723588943481, 0.6678516864776611, 0.14292088…	0
ENSG00000075618.18	human-mRNA	1010	GGGCUGCGACUAUAACAAGGUGGCCAUCAAGGUGGGCGGGCGCUACCUGAAGGGCGACCACGCAGGCGUCCUGAAGGCCUCGGCGGAAACCGUGGACCCCGCCUCGCUCUGGGAGUACUAGGGCCGGCCCGUCCUUCCCCGCCCCUGCCCACAUGGCGGCUCCUGCCAACCCUCCCUGCUAACCCCUUCUCCGCCAGGUGGGCUCCAGGGCGGGAGGCAAGCCCCCUUGCCUUUCAAACUGGAAACCCCAGAGAAAACGGUGCCCCCACCUGUCGCCCCUAUGGACUCCCCACUCUCCCCUCCGCCCGGGUUCCCUACUCCCCUCGGGUCAGCGGCUGCGGCCUGGCCCUGGGAGGGAUUUCAGAUGCCCCUGCCCUCUUGUCUGCCACGGGGCGAGUC…	nan nan nan 0.4154 nan nan 0.3116 nan 0.3766 0.5923 nan 0.5237 nan 0.716 0.7124 0.9914 0.6414 0.3273 nan nan nan nan nan 0.5796 0.3455 0.2755 nan 0.4844 0.5281 0.3224 nan nan nan nan nan nan 0.2463 nan nan nan 0.3907 nan 0.3529 nan 1.0 0.084 0.0353 nan nan 1.0 0.2559 nan nan nan 0.0589 nan 0.5665 0.1769 0.147 0.7068 1.0 nan 0.8597 0.7319 nan nan 0.15 nan nan 0.0522 0.0488 nan nan 1.0 0.363 nan na…	nan nan nan 0.5477320675105486 nan nan 0.4108649789029536 nan 0.4965717299578059 0.7809862869198313 nan 0.690532700421941 nan 0.9440928270042194 0.9393459915611815 1.3072257383966244 0.8457278481012658 0.4315664556962025 nan nan nan nan nan 0.764240506329114 0.45556434599156115 0.3632647679324895 nan 0.6387130801687764 0.6963343881856541 0.42510548523206754 nan nan nan nan nan nan 0.3247626582278…	[0.16279742121696472, 0.15733349323272705, 0.11889410763978958, 0.2381553053855896, 0.2879459261894226, 0.3840312063694, 0.16892416775226593, 0.34896320104599, 0.2976349890232086, 0.24685099720954895, 0.5878741145133972, 0.35898876190185547, 0.43177756667137146, 0.6772518754005432, 0.42806774377822876, 0.2739623785018921, 0.30327653884887695, 0.34396523237228394, 0.30837029218673706, 0.2095212936…	[0.12673045694828033, 0.07140855491161346, 0.16296783089637756, 0.3963068127632141, 0.12120047211647034, 0.23850663006305695, 0.586556077003479, 0.1170167401432991, 0.7311241030693054, 0.5679434537887573, 0.1791647970676422, 0.8869268894195557, 0.2470197081565857, 0.8297600746154785, 0.885188102722168, 0.7969130277633667, 0.6745603680610657, 0.6140453815460205, 0.0834539532661438, 0.2320802211761…	0
ENSG00000075914.13	human-mRNA	700	GGGGUGUGGAUGGCCGUGGCUGUGAGGACUACCGAUGUGUCGAAGUGGAAACUGAUGUGGUGUCCAACACUAGUGGGUCCGCCAGGGUCAAGCUGGGUCACACAGACAUCUUGGUGGGAGUGAAAGCAGAAAUGGGGACGCCGAAGCUGGAGAAACCAAAUGAAGGCUACUUGGAGUUCUUUGUUGACUGUUCAGCCAGUGCUACCCCUGAAUUUGAAGGUAGAGGAGGUGAUGACCUUGGCACCGAGAUCGCUAACACCCUCUAUCGGAUAUUUAACAAUAAAAGCAGUGUCGACUUAAAGACCCUCUGCAUUAGUCCUCGGGAGCACUGCUGGGUUCUCUAUGUGGAUGUGCUGCUUCUGGAAUGUGGUGGAAAUUUGUUUGAUGCCAUUUCCAUUG…	nan nan nan nan nan nan nan nan nan 0.4061 nan nan nan 0.0959 0.1542 nan nan nan nan 0.1318 nan nan nan nan 0.5648 nan nan 0.144 0.0828 nan 0.4816 0.201 0.1096 nan 0.4242 nan nan nan nan nan 0.4175 nan 0.7816 0.5931 nan nan nan nan 0.3368 0.4632 0.3056 0.1264 nan nan 0.6029 nan nan nan nan nan nan nan nan 0.0753 0.061 0.6817 0.456 0.1809 0.2871 0.1899 nan 0.6759 nan nan nan nan nan nan 0.0674 0.0…	nan nan nan nan nan nan nan nan nan 0.5354694092827005 nan nan nan 0.1264504219409283 0.20332278481012658 nan nan nan nan 0.17378691983122363 nan nan nan nan 0.7447257383966245 nan nan 0.18987341772151897 0.10917721518987342 nan 0.6350210970464135 0.2650316455696203 0.14451476793248946 nan 0.5593354430379748 nan nan nan nan nan 0.5505010548523207 nan 1.030590717299578 0.7820411392405063 nan nan n…	[0.10915638506412506, 0.11148983985185623, 0.13631168007850647, 0.19421660900115967, 0.4105333983898163, 0.2487061321735382, 0.3592529594898224, 0.28259938955307007, 0.325533002614975, 0.46493208408355713, 0.4188946783542633, 0.2901817560195923, 0.12092804908752441, 0.09016703069210052, 0.1503857970237732, 0.4787004590034485, 0.3074643015861511, 0.2601919174194336, 0.0697755366563797, 0.245862677…	[0.1499003767967224, 0.059772759675979614, 0.05274656414985657, 0.18810196220874786, 0.11622635275125504, 0.2573119103908539, 0.16788262128829956, 0.1404755711555481, 0.0815577581524849, 0.5232295393943787, 0.12991249561309814, 0.07611288875341415, 0.09708702564239502, 0.23586851358413696, 0.3432803750038147, 0.23115380108356476, 0.09410398453474045, 0.12829536199569702, 0.18327398598194122, 0.36…	0
ENSG00000077454.17	human-mRNA	313	GGGGUCACUGUGCCAGCCCCACCACAUCCUGGAAGAGGAGGGGGCCCCGGGAAGGGGCCUCCCCUACAUCGCUGCUGUCGUCCACGCCCUGCUGGACCGGCCUUAGGGGUGAAGGUGGGGGCACAGGGCCCACCCCGCCCGGGACCCCGGGAGCAGAAGACGCGCCUGGGCUCCGCGCUCUCAGAGAAGCACGUGGUGAGGGUGGCCUGGGCCUGGGCACCCUUGGCCUGCCGGCCUGGCUGCCUCUGGGGUCGAGGGUCUGGGUGGAAGGACCGCGGGUGUCGCAGGUGUCGUGUCAGCCGCAAUAAACAGA	nan nan nan nan nan 0.1381 0.4952 0.1665 nan nan nan nan 0.0971 0.4465 0.5812 nan 0.4698 0.0188 0.0293 0.0271 0.1056 0.1258 0.0902 1.0 0.1473 0.1424 nan 0.085 0.0293 nan nan nan 0.5172 0.5781 nan 0.3135 nan nan 0.4645 nan nan nan nan nan 0.0302 0.0105 0.0104 0.0214 nan nan nan 0.8738 0.8498 nan nan nan nan 0.0219 0.0119 nan 0.0175 0.004 0.0137 0.0163 nan 0.6123 0.5218 0.543 nan 0.4457 nan 0.4793 …	nan nan nan nan nan 0.1820938818565401 0.6529535864978903 0.21954113924050636 nan nan nan nan 0.12803270042194095 0.5887394514767933 0.7663502109704642 nan 0.6194620253164557 0.02478902953586498 0.03863396624472574 0.0357331223628692 0.13924050632911392 0.16587552742616035 0.11893459915611815 1.3185654008438819 0.19422468354430378 0.1877637130801688 nan 0.11207805907172998 0.03863396624472574 nan…	[0.12416122108697891, 0.11956898123025894, 0.04449382424354553, 0.07174943387508392, 0.26439279317855835, 0.4760054349899292, 0.32439124584198, 0.5904805660247803, 0.2247338742017746, 0.11036717891693115, 0.20234209299087524, 0.19835318624973297, 0.12706413865089417, 0.13890859484672546, 0.602094829082489, 0.47643738985061646, 0.17282536625862122, 0.031340740621089935, 0.02960968017578125, 0.0113…	[0.0992855355143547, 0.044153571128845215, 0.05424030125141144, 0.1392507702112198, 0.12696871161460876, 0.2780988812446594, 0.7043045163154602, 0.30665817856788635, 0.07385125756263733, 0.060275375843048096, 0.08746122568845749, 0.08320844918489456, 0.2051406055688858, 0.5273582935333252, 1.0009686946868896, 0.08568379282951355, 0.3865037262439728, 0.06354644894599915, 0.06086503714323044, 0.098…	0
ENSG00000077984.6	human-mRNA	581	GGGGGAACUCUGCUGGCCUUCUGCUGCCUGGUCUUGAGCACCACUGGGGGCCCUUCCCCAGAUACUUGUUCCCAGGACCUUAACUCACGUGUGAAGCCAGGAUUUCCUAAAACAAUAAAGACCAAUGACCCAGGAGUCCUCCAAGCAGCCAGAUACAGUGUUGAAAAGUUCAACAACUGCACGAACGACAUGUUCUUGUUCAAGGAGUCCCGCAUCACAAGGGCCCUAGUUCAGAUAGUGAAAGGCCUGAAAUAUAUGCUGGAGGUGGAAAUUGGCAGAACUACCUGCAAGAAAAACCAGCACCUGCGUCUGGAUGACUGUGACUUCCAAACCAACCACACCUUGAAGCAGACUCUGAGCUGCUACUCUGAAGUCUGGGUCGUGCCCUGGCUCCAGCAC…	nan nan nan nan nan 0.3297 0.2795 0.2804 nan 0.142 nan nan 0.3166 nan nan nan 0.3668 0.1222 nan nan 0.1307 nan nan 0.231 nan nan 0.7009 0.3872 nan nan nan nan 0.0794 nan nan nan 0.4945 nan 0.3747 0.3065 0.6516 1.0 0.628 0.0659 nan nan nan nan nan nan 0.9621 0.6786 0.4586 nan nan 0.0273 0.0173 0.0125 0.021 0.0858 nan 0.8345 nan 0.837 1.0 nan nan nan nan nan 0.1941 0.3147 0.2243 0.126 nan nan 0.269…	nan nan nan nan nan 0.43473101265822783 0.36853902953586504 0.3697257383966245 nan 0.1872362869198312 nan nan 0.417457805907173 nan nan nan 0.4836497890295359 0.16112869198312238 nan nan 0.17233649789029537 nan nan 0.3045886075949367 nan nan 0.9241824894514767 0.510548523206751 nan nan nan nan 0.10469409282700422 nan nan nan 0.6520305907172996 nan 0.4940664556962025 0.4041402953586498 0.859177215…	[0.09642961621284485, 0.07210701704025269, 0.03977413848042488, 0.040473029017448425, 0.1358446478843689, 0.27547645568847656, 0.2469441294670105, 0.2752493619918823, 0.17226997017860413, 0.1709252893924713, 0.37370219826698303, 0.3310181498527527, 0.16146259009838104, 0.23199063539505005, 0.22617290914058685, 0.23783589899539948, 0.10193105787038803, 0.16798993945121765, 0.42179763317108154, 0.6…	[0.08977894484996796, 0.05227433890104294, 0.05421532690525055, 0.06021562218666077, 0.0793514996767044, 0.45992612838745117, 0.5038154125213623, 0.620108962059021, 0.13334333896636963, 0.3364652395248413, 0.17572253942489624, 0.15645098686218262, 0.37356796860694885, 0.15272580087184906, 0.06444381922483444, 0.10777483135461807, 0.4069892466068268, 0.32531532645225525, 0.15943670272827148, 0.172…	0
ENSG00000079257.8	human-mRNA	512	GGGAGGACGGGCGGCGCUCUGCUACUGGUCCCGUUAAGCCAGAGUAGCCCAAGCCCUGAAGUCACUGCUCAUCCGGAAUGGAAAUCCCGCCGACCAACUACCCAGCCUCCAGGGCGGCCUUGGUGGCACAGAACUACAUCAACUACCAGCAGGGGACCCCGCACAGGGUGUUUGAGGUGCAGAAGGUCAAACAAGCCAGCAUGGAGGAUAUUCCAGGAAGAGGACAUAAGUAUCGCCUUAAAUUUGCUGUUGAAGAAAUUAUACAAAAACAAGUUAAGGUGAACUGCACAGCUGAAGUACUUUACCCUUCAACGGGACAAGAAACUGCACCAGAAGUCAACUUCACAUUUGAAGGAGAAACUGGAAAGAAUCCAGAUGAAGAAGACAACACAUUUUAUC…	nan nan nan 0.3488 nan nan 0.5105 0.6053 nan nan nan 0.1605 nan nan 0.2202 nan 0.1484 nan 0.0967 nan nan 0.2385 nan 0.6937 0.3944 nan nan nan nan 0.0616 0.0591 0.0863 nan nan nan 0.5779 0.4335 nan 0.6163 0.2148 0.1511 nan 0.2518 nan nan 0.4563 nan 0.1691 0.1519 0.9921 0.6009 0.7893 nan 0.0904 0.1581 0.1531 nan nan 0.8377 0.596 nan nan 0.2514 0.7435 0.5385 nan nan 0.1501 nan 0.2143 0.5134 nan 0.12…	nan nan nan 0.45991561181434604 nan nan 0.6731276371308017 0.7981276371308017 nan nan nan 0.21162974683544306 nan nan 0.29034810126582283 nan 0.1956751054852321 nan 0.12750527426160338 nan nan 0.31447784810126583 nan 0.9146888185654009 0.520042194092827 nan nan nan nan 0.08122362869198313 0.07792721518987342 0.11379219409282701 nan nan nan 0.7619989451476793 0.5715981012658228 nan 0.8126318565400…	[0.20514439046382904, 0.2313086986541748, 0.12023133784532547, 0.2254272848367691, 0.20054787397384644, 0.17475096881389618, 0.10705164074897766, 0.16476145386695862, 0.03690780699253082, 0.1122431680560112, 0.033966969698667526, 0.14790084958076477, 0.07075904309749603, 0.1404300034046173, 0.1965469866991043, 0.21518349647521973, 0.22539541125297546, 0.15652334690093994, 0.15461277961730957, 0.1…	[0.11328887939453125, 0.11906635016202927, 0.10297118127346039, 0.6897230744361877, 0.10264644026756287, 0.07012034952640533, 0.6156508922576904, 0.777315080165863, 0.13087305426597595, 0.04381437599658966, 0.13867872953414917, 0.44039878249168396, 0.15251746773719788, 0.09056839346885681, 0.7707576751708984, 0.19584861397743225, 0.5878322720527649, 0.11368861794471741, 0.2655171751976013, 0.1541…	0
ENSG00000081181.8	human-mRNA	412	GGGAAGGGGCAGCCUCUCGCGUCUCCUCCAGACGCGAGUGCAUUCCAUCCUGAAGAAAUCCGUCCACUCCGUGGCUGUGAUAGGAGCCCCGUUCUCACAAGGGCAGAAAAGAAAAGGAGUGGAGCAUGGUCCCGCUGCCAUAAGAGAAGCUGGCUUGAUGAAAAGGCUCUCCAGUUUGGGCUGCCACCUAAAAGACUUUGGAGAUUUGAGUUUUACUCCAGUCCCCAAAGAUGAUCUCUACAACAACCUGAUAGUGAAUCCACGCUCAGUGGGUCUUGCCAACCAGGAACUGGCUGAGGUGGUUAGCAGAGCUGUGUCAGAUGGCUACAGCUGUGUCACACUGGGAGGAGACCACAGCCUGGCAAUCGGUACCAUUAGUGGCCAUGCCCGACACUGCCC…	nan nan nan 0.4087 0.2697 nan nan nan nan 0.1585 0.3437 nan 0.254 0.1646 nan 0.0562 nan 0.1381 nan 0.0784 nan nan 0.0156 nan 0.65 0.2634 nan 0.6971 0.501 0.5239 nan 0.1076 0.0412 nan 0.0273 nan 0.1049 nan nan nan 0.5416 0.7347 nan nan 0.1961 0.0891 0.229 nan 0.1406 0.068 nan nan 0.5367 0.55 nan 0.4996 0.5585 0.4894 nan 0.2384 0.2537 nan nan 0.0225 0.0199 0.0611 0.0271 nan 0.2011 0.1432 nan nan na…	nan nan nan 0.5388976793248945 0.35561708860759494 nan nan nan nan 0.2089926160337553 0.4531909282700422 nan 0.33491561181434604 0.21703586497890295 nan 0.07410337552742616 nan 0.1820938818565401 nan 0.10337552742616034 nan nan 0.020569620253164556 nan 0.8570675105485233 0.34731012658227856 nan 0.9191719409282701 0.6606012658227849 0.6907964135021097 nan 0.1418776371308017 0.054324894514767935 na…	[0.2110145092010498, 0.1742803156375885, 0.23219731450080872, 0.2358453869819641, 0.22177690267562866, 0.13459384441375732, 0.026186984032392502, 0.03702650964260101, 0.038777004927396774, 0.16775161027908325, 0.21382597088813782, 0.18600594997406006, 0.07658790796995163, 0.04713589325547218, 0.1823464334011078, 0.03947778791189194, 0.05039903521537781, 0.10639806091785431, 0.09646020829677582, 0…	[0.1104179099202156, 0.08751267939805984, 0.08112304657697678, 0.5255845785140991, 0.8446980714797974, 0.075873002409935, 0.04345086216926575, 0.03691890835762024, 0.1535571664571762, 0.6963927149772644, 0.9003294110298157, 0.06959261745214462, 0.5491271018981934, 0.2681548595428467, 0.13962650299072266, 0.22115743160247803, 0.06351663172245026, 0.27920156717300415, 0.13470016419887543, 0.3978030…	0
ENSG00000081913.14	human-mRNA	929	GGGAGCAGCAGCCGCCACCACCCCCUCAGCUCCAGCCGCAGCUGCCGCGGCACUACCAGCUGGACCAGCUGCCAGAUUAUUACGACACGCCACUAUGACCCAGCCGAGCUGUUUAACAAAUAAACUAACCACAAAAGACUGAGUUGCAAGAGUCUCCCAGGCUCACAUUAAACCAGGGGUUUUACUCCACAUCCUUCCCCCAGACACUGUUCCCAACCUGUCAUCGCAGCUAAUCUGUAGGUUCUCUUUCUUUGGGUUAUUUUUUUAAGUAAUCACCACUUUCUUCUAGUGAUGCUUUACCAAUAUGAUUUACAUUUGUUAACUUCUCCCCCUAACAUAUCAGAUAUGUAAAGACAAAGAACAAAAGGUUUAAUAUAUUACAGAGAAACAGUUAAUGAU…	nan nan nan 0.1784 nan 0.2562 0.2589 nan 0.5468 0.4379 nan 0.2536 0.185 nan 0.2124 0.147 0.2739 0.3245 0.1572 0.4521 0.1333 0.0494 0.0799 0.2054 0.2541 nan 0.2914 0.4063 nan 0.2698 nan 0.2909 0.2747 0.5097 nan 0.2168 0.2815 nan 0.1909 0.5428 nan 0.3652 nan nan 0.3696 0.3917 nan 0.3041 nan nan 0.2634 0.8565 0.8071 nan 0.7794 0.8942 0.6858 0.6261 nan 0.1068 nan nan nan 0.8429 0.6098 0.2127 0.3792 n…	nan nan nan 0.23523206751054854 nan 0.3378164556962025 0.34137658227848106 nan 0.7209915611814346 0.5773997890295359 nan 0.33438818565400846 0.24393459915611815 nan 0.2800632911392405 0.19382911392405064 0.3611550632911392 0.4278744725738397 0.20727848101265825 0.596123417721519 0.17576476793248946 0.06513713080168776 0.10535337552742616 0.27083333333333337 0.3350474683544304 nan 0.38422995780590…	[0.20051048696041107, 0.20381462574005127, 0.17503699660301208, 0.43352028727531433, 0.09976869076490402, 0.23763328790664673, 0.048030078411102295, 0.02926800027489662, 0.06020176410675049, 0.15435460209846497, 0.15283048152923584, 0.07921024411916733, 0.13708846271038055, 0.1672879308462143, 0.09769458323717117, 0.02907644212245941, 0.27034348249435425, 0.046362221240997314, 0.06292052567005157…	[0.21056264638900757, 0.06663350760936737, 0.07594102621078491, 0.7431436777114868, 0.14706885814666748, 0.9648381471633911, 0.7370380163192749, 0.13485953211784363, 0.5969281196594238, 0.8841832876205444, 0.11649690568447113, 0.4523540437221527, 0.40624314546585083, 0.16690385341644287, 0.2997824549674988, 0.3467288017272949, 0.7394764423370361, 0.46532443165779114, 0.6702675819396973, 0.8987141…	0
ENSG00000083812.13	human-mRNA	702	GGGUCCUUUUCAGGGUCAGAGGUGGGUUGGGGUAGCCAGGAGCUGGAUGAACUGGGAUAGAGUGGGGCUGUCUGGAGCAGCAGCCCUGCUAGAUGAGUCCUGGUGGAUCCUGGCAAUGGGAGGAUGGUAGGUGGAGAAACCAAGGCAGGGCUGUGUUCCUUCUGCUGCUGAGAUAGAGGGUGUGGCCAUGUGUGAUGACCCUGCAAGGUUGACUCCAACCAGUGGGCACUCCAUCCCAUGGCUUCCAAAAUCCUGCAGCUAUCCUGCCCUAUACACAAAGAGCCCAGAUCCAGGCCCCACACACUUGAUAUUGGGGCCAGACUCUUCCACCUGUGAAACCUCACAGGUUCCUGCAGGGAGUGGAGACACACAGAACCUAGCUCCCCUGGAGCCUGCAAG…	nan nan nan nan 0.0837 0.0471 nan nan nan nan 0.263 0.1502 nan nan nan nan 0.1787 0.2898 nan 0.3172 nan nan nan nan nan nan nan nan nan nan nan nan nan 0.4414 nan 0.1088 0.0597 0.0712 nan nan 0.2479 nan 0.3271 nan nan nan 0.3838 nan nan 0.7553 0.2623 0.0676 nan nan nan nan 0.1569 nan 0.5177 nan 0.2627 nan nan nan nan nan nan 0.0302 nan nan nan 0.2439 nan nan nan 0.4751 nan 0.2353 0.8563 nan 0.027…	nan nan nan nan 0.11036392405063292 0.06210443037974684 nan nan nan nan 0.346782700421941 0.19804852320675106 nan nan nan nan 0.2356276371308017 0.382120253164557 nan 0.4182489451476793 nan nan nan nan nan nan nan nan nan nan nan nan nan 0.5820147679324895 nan 0.14345991561181434 0.07871835443037975 0.0938818565400844 nan nan 0.32687236286919835 nan 0.4313027426160338 nan nan nan 0.50606540084388…	[0.22964437305927277, 0.08262231945991516, 0.1668006330728531, 0.3644864857196808, 0.13222277164459229, 0.09613604843616486, 0.40575146675109863, 0.5063203573226929, 0.45541587471961975, 0.47732168436050415, 0.19195574522018433, 0.2675173282623291, 0.20710651576519012, 0.08230194449424744, 0.16560213267803192, 0.2767782211303711, 0.21118654310703278, 0.14121362566947937, 0.1000945121049881, 0.262…	[0.10891953855752945, 0.0764118954539299, 0.0803108811378479, 0.1328839659690857, 0.3078245520591736, 0.26996883749961853, 0.1141134649515152, 0.1370132565498352, 0.1516636162996292, 0.1093824952840805, 0.5592614412307739, 0.6430899500846863, 0.061918459832668304, 0.055301472544670105, 0.1573866605758667, 0.12750378251075745, 0.3949474096298218, 0.5802077651023865, 0.07545514404773712, 0.64134800…	0
ENSG00000084092.7	human-mRNA	860	GGGACCGUGGGGACGUCUACUUAGUGGGCGCCACCAACGCCGGCAAAUCCACUCUCUUUAACACGCUCCUGGAGUCCGAUUACUGCACUGCCAAGGGCUCCGAGGCCAUCGACAGAGCCACCAUCUCCCCUUGGCCAGGUACUACAUUAAACCUUCUGAAGUUUCCUAUUUGCAACCCAACUCCUUACAGAAUGUUUAAAAGGCAUCAAAGACUUAAAAAAGAUUCAACUCAAGCUGAAGAAGAUCUUAGUGAGCAAGAACAAAAUCAGCUUAAUGUCCUCAAAAAGCAUGGUUAUGUCGUAGGAAGAGUUGGAAGGACAUUCUUGUAUUCAGAAGAACAGAAGGAUAACAUUCCCUUUGAGUUUGAUGCUGAUUCACUUGCCUUUGACAUGGAAAAUG…	nan nan nan 0.3895 0.5949 0.2981 nan nan nan nan nan nan 0.1711 0.1881 nan nan 0.0515 nan 0.171 0.1741 nan nan 0.4064 nan nan nan nan nan 0.0965 nan 0.0955 0.043 0.3076 0.1408 0.1217 0.5149 0.6532 0.4475 nan 0.3566 0.1458 nan nan 0.4837 0.5191 0.5831 0.5505 nan 0.2159 0.162 0.131 0.3234 nan 0.283 nan 0.3661 nan nan nan 0.617 0.652 0.9484 0.5447 0.467 nan 0.1095 nan 0.0988 0.0755 nan nan nan 0.224…	nan nan nan 0.5135812236286921 0.7844145569620253 0.39306434599156115 nan nan nan nan nan nan 0.2256065400843882 0.24802215189873417 nan nan 0.06790611814345991 nan 0.22547468354430383 0.22956223628691985 nan nan 0.5358649789029536 nan nan nan nan nan 0.12724156118143462 nan 0.1259229957805907 0.05669831223628692 0.4055907172995781 0.18565400843881857 0.16046940928270043 0.6789293248945149 0.8612…	[0.24863682687282562, 0.20063170790672302, 0.1604318618774414, 0.21450358629226685, 0.1158868670463562, 0.17320653796195984, 0.40508565306663513, 0.41766756772994995, 0.04994015395641327, 0.10345786809921265, 0.0712399035692215, 0.09664730727672577, 0.15371479094028473, 0.1615624874830246, 0.18231114745140076, 0.053487926721572876, 0.09437727928161621, 0.183442160487175, 0.5228302478790283, 0.220…	[0.2060774862766266, 0.16087521612644196, 0.10192753374576569, 0.466996431350708, 0.4814048409461975, 0.49774879217147827, 0.34632235765457153, 0.20387502014636993, 0.23211249709129333, 0.07108160108327866, 0.08468801528215408, 0.0913662537932396, 0.5711366534233093, 0.7592389583587646, 0.12515322864055634, 0.1359274685382843, 0.329811692237854, 0.11727657914161682, 0.6320140957832336, 0.78557038…	0
ENSG00000084733.11	human-mRNA	396	GGGGAGAGGGCACGGGGAAAAGGUGGCUCUGGCCGGGGUGGCUCGGUUUCCUGGGGCUAUGUAACUGAGCUCGUCGACUUAGGGGUCCUUCUUCGCUGCCCUCGCCGCGUGCUAGCAGGGAGUUUCCGCUCGGGAGAGAGACUGUCCUCACGCCCGCUGCGCCUCCUCGACGGCAGAGCAGGCUUGCUCGCCCGUGGGAGCGUCCCGGCCGAGAAGCCCUGAGGGGGGAGGGGAGGCCAUUUUGUCCCGACCGACUCCCCGGAACCGGGCGGACGGGCUGGGAGAGGCUGCGGAGCCGCGGUCGCCGCCCUCGGAGGCACUGGACGCCGCCACUGUCGGGGCUUCCUCAAAGCUGUUCGUAGGUCGCCCGCGCCGUCUCGAGCCUUUUUCCCACGC	nan nan nan nan 0.2526 nan 0.2121 nan nan nan 0.1345 0.206 0.1749 nan nan nan nan 0.1023 0.2255 0.3831 0.4084 nan nan nan nan nan 0.0803 nan 0.1194 nan nan nan 0.081 0.0602 nan nan nan nan nan nan nan 0.2603 nan 0.0732 nan nan nan nan nan 0.195 0.1908 nan nan nan nan nan 0.3042 nan 0.3733 nan nan nan 0.2266 0.188 0.1293 nan nan 0.1712 nan 0.0474 nan 0.1229 nan nan 0.1095 nan 0.2507 0.1294 nan nan…	nan nan nan nan 0.33306962025316456 nan 0.2796677215189874 nan nan nan 0.17734704641350213 0.27162447257383965 0.23061708860759494 nan nan nan nan 0.1348892405063291 0.29733649789029537 0.5051424050632911 0.5385021097046414 nan nan nan nan nan 0.10588080168776372 nan 0.1574367088607595 nan nan nan 0.10680379746835444 0.07937763713080169 nan nan nan nan nan nan nan 0.3432225738396624 nan 0.0965189…	[0.12881705164909363, 0.12497425079345703, 0.1738021969795227, 0.08280842006206512, 0.4510754346847534, 0.1329021155834198, 0.4423519968986511, 0.08691380172967911, 0.19645491242408752, 0.11119894683361053, 0.3216547966003418, 0.206022709608078, 0.29899680614471436, 0.12324488162994385, 0.04346632957458496, 0.03194882348179817, 0.18267109990119934, 0.10799699276685715, 0.23896382749080658, 0.0992…	[0.14842048287391663, 0.07836049050092697, 0.10205688327550888, 0.11203456670045853, 0.6133460402488708, 0.09718549996614456, 0.539800763130188, 0.0716056153178215, 0.07077561318874359, 0.13851556181907654, 0.36833667755126953, 0.5631095170974731, 0.41757363080978394, 0.12349588423967361, 0.04356969892978668, 0.0633835420012474, 0.08060462027788162, 0.408330500125885, 0.37529730796813965, 0.36716…	0
ENSG00000085719.13	human-mRNA	505	GGGUGUGGCUUCUCAGAAGCAGCUCAUUGCCAAGGCCAGGCUGAGAGGGGACCUGCUUGCUGUGGUGGUUGCCUAGCCCAGAUGAGCAUUUACCUACCACCUUCCCACUUGGCUAGCUGUCCUUUGGAUAUGUGCUGUUAACUGGGGAAGGCAUCUAACUAGUAGCCUGCUACUCCAUAGUAUGGCUCAAUAGAUGACACAUCAUUUUGACAUUAUCAAUAGGAGAAAAGAAAACUAACCCUUCUUCUGAUUGUUUGGAGCCAUAGUUGUCUCAGAUGUUCUAAUUCUCUUUGUAUGCUUGGAAACAGCAUAGAUAUGUUGCUGUGGUUUUCAGAAUUUUCUCUUUUAAUCACAAGAAGCCUUUUAAAAAAUGACUUACACAUAUUCUCAAUGUACAGU…	nan nan nan nan nan nan nan nan 0.2439 nan nan 0.0565 nan 0.3527 0.3794 nan 0.8953 0.4092 nan 0.1063 0.364 nan 0.0515 nan 0.0923 0.14 nan nan nan 0.2184 0.2183 0.2617 0.5256 nan nan 0.2446 0.1439 0.2403 nan nan 0.1505 nan nan 0.3017 nan 0.9946 nan nan nan nan 0.7041 1.0 0.3893 nan nan 0.4706 nan nan nan 0.4558 nan nan nan nan nan nan nan nan nan nan nan 0.4181 0.3117 nan 0.9833 nan 0.132 0.1315 0…	nan nan nan nan nan nan nan nan 0.32159810126582283 nan nan 0.07449894514767932 nan 0.46505801687763715 0.5002637130801688 nan 1.1805116033755274 0.5395569620253164 nan 0.14016350210970466 0.479957805907173 nan 0.06790611814345991 nan 0.12170358649789029 0.18459915611814348 nan nan nan 0.28797468354430383 0.2878428270042194 0.3450685654008439 0.6930379746835443 nan nan 0.3225210970464135 0.189741…	[0.21310219168663025, 0.2048560380935669, 0.14505153894424438, 0.4884209632873535, 0.1733003556728363, 0.3105524182319641, 0.2984008193016052, 0.36204198002815247, 0.23803812265396118, 0.48298370838165283, 0.40037885308265686, 0.16048389673233032, 0.12646716833114624, 0.15139655768871307, 0.24348601698875427, 0.16149717569351196, 0.3926413059234619, 0.2237187623977661, 0.14846603572368622, 0.1505…	[0.10422968864440918, 0.054364413022994995, 0.15661804378032684, 0.23549319803714752, 0.24503812193870544, 0.20357003808021545, 0.22050373256206512, 0.13983884453773499, 0.4316917061805725, 0.14668963849544525, 0.14320756494998932, 0.3092869520187378, 0.10608214884996414, 0.3840428590774536, 0.5744627714157104, 0.07923144102096558, 0.996107280254364, 0.735309362411499, 0.175438791513443, 0.451900…	0
ENSG00000086015.23	human-mRNA	765	GGGUCCCACAAAGCUUCACUUGUCACCUCCCCUGGGCAGGCAACUCUCACGGCCCAAGAGUGCGGAGCCACCCCGUUCACCACUACUCAAGAGGGUGCAGUCGGCUGAGAAACUGGCAGCAGCACUUGCCGCCUCUGAGAAGAAGCUAGCCACUUCUCGCAAGCACAGCCUUGACCUGCCCCACUCUGAACUAAAGAAGGAACUGCCGCCCAGGGAAGUGAGCCCUCUGGAGGUAGUUGGAGCCAGGAGUGUGCUGUCUGGCAAGGGGGCCCUGCCAGGGAAGGGGGUGCUGCAGCCUGCUCCCUCACGGGCCCUAGGCACCCUCCGGCAGGACCGAGCCGAACGACGGGAGUCGCUGCAGAAGCAAGAAGCCAUUCGUGAGGUGGACUCCUCAGAGGA…	nan nan nan nan nan nan nan nan nan nan nan nan nan 0.0959 nan nan 0.0822 0.3553 0.2931 nan nan nan nan 0.1309 0.3517 0.1887 0.045 nan 0.0957 0.0399 0.0423 0.0951 nan nan nan nan 0.2539 0.2645 nan nan 0.1703 0.4181 0.3946 0.2287 nan 0.0548 nan 0.1072 0.3418 0.453 nan nan 0.0428 0.0829 0.0888 0.4536 0.3523 nan 0.4516 nan nan nan 0.2377 nan nan 0.3782 nan 0.1007 0.0734 0.2074 0.0855 0.0391 0.0316 0…	nan nan nan nan nan nan nan nan nan nan nan nan nan 0.1264504219409283 nan nan 0.10838607594936708 0.46848628691983124 0.38647151898734183 nan nan nan nan 0.17260021097046413 0.4637394514767933 0.24881329113924053 0.05933544303797469 nan 0.1261867088607595 0.05261075949367089 0.0557753164556962 0.12539556962025317 nan nan nan nan 0.33478375527426163 0.34876054852320676 nan nan 0.2245516877637131 …	[0.2056025266647339, 0.10090604424476624, 0.2540096342563629, 0.3441905379295349, 0.13768331706523895, 0.2177882194519043, 0.01728729158639908, 0.33178311586380005, 0.28895115852355957, 0.15518707036972046, 0.8364489674568176, 0.07840265333652496, 0.14027556777000427, 0.16981536149978638, 0.3380204439163208, 0.28692519664764404, 0.19664795696735382, 0.2744113802909851, 0.30645304918289185, 0.3248…	[0.07774242758750916, 0.0737454742193222, 0.07854390144348145, 0.10287146270275116, 0.187759131193161, 0.17479214072227478, 0.26586681604385376, 0.5917506217956543, 0.8889830112457275, 0.7095605134963989, 0.9672728776931763, 0.9694212079048157, 0.12063927948474884, 0.32085028290748596, 0.10942504554986954, 0.09725967794656754, 0.3345359265804291, 0.6691067218780518, 0.4778434634208679, 0.12199713…	0
ENSG00000086548.9	human-mRNA	891	GGGGAAGGAGGAAGGACAGCAGGGCCAACAGUCACAGCAGCCCUGACCAGAGCAUUCCUGGAGCUCAAGCUCCUCUACAAAGAGGUGGACAGAGAAGACAGCAGAGACCAUGGGACCCCCCUCAGCCCCUCCCUGCAGAUUGCAUGUCCCCUGGAAGGAGGUCCUGCUCACAGCCUCACUUCUAACCUUCUGGAACCCACCCACCACUGCCAAGCUCACUAUUGAAUCCACGCCGUUCAAUGUCGCAGAGGGGAAGGAGGUUCUUCUACUCGCCCACAACCUGCCCCAGAAUCGUAUUGGUUACAGCUGGUACAAAGGCGAAAGAGUGGAUGGCAACAGUCUAAUUGUAGGAUAUGUAAUAGGAACUCAACAAGCUACCCCAGGGCCCGCAUACAGUGG…	nan nan nan nan 0.4494 0.511 nan nan 0.2644 nan nan 0.377 0.327 nan nan 0.4345 0.9377 0.3282 nan 0.0844 0.1068 nan nan nan 0.2135 0.2348 0.6049 0.9366 0.62 0.6811 nan nan 0.2319 0.4698 0.5105 0.651 nan 0.4055 0.7198 nan 0.1044 0.0657 0.0819 nan nan 0.5453 0.3025 0.2615 0.354 nan 0.5028 nan 0.3296 0.4604 nan nan 0.1639 0.1269 nan nan nan 0.4883 nan 0.0822 nan 0.4905 0.8062 0.7782 nan 0.271 nan 0.0…	nan nan nan nan 0.5925632911392406 0.6737869198312236 nan nan 0.3486286919831224 nan nan 0.4970991561181435 0.4311708860759494 nan nan 0.5729166666666667 1.2364187763713081 0.43275316455696206 nan 0.11128691983122364 0.14082278481012658 nan nan nan 0.28151371308016876 0.3095991561181435 0.7976002109704642 1.2349683544303798 0.8175105485232068 0.8980748945147681 nan nan 0.3057753164556962 0.619462…	[0.16729703545570374, 0.1756596863269806, 0.15069317817687988, 0.1717507243156433, 0.3293563723564148, 0.33697420358657837, 0.3113223910331726, 0.23322495818138123, 0.221025288105011, 0.21881426870822906, 0.2645949423313141, 0.4556325078010559, 0.4535902142524719, 0.4670984148979187, 0.27789241075515747, 0.22408974170684814, 0.18950268626213074, 0.19078893959522247, 0.23877298831939697, 0.1567486…	[0.11455785483121872, 0.12053738534450531, 0.11466848105192184, 0.1075306236743927, 0.8388462066650391, 0.7914824485778809, 0.0801742896437645, 0.12971261143684387, 0.8501792550086975, 0.09837671369314194, 0.07690352201461792, 0.9565786123275757, 0.8102586269378662, 0.1173735037446022, 0.08548566699028015, 0.776627242565155, 0.9306451082229614, 0.7887194752693176, 0.17540079355239868, 0.539094567…	11.22
ENSG00000087338.5	human-mRNA	484	GGGAGGGGGCGAGGUGCUGCGGUGCUAGAGCGCGGCGCGACCGGACGCUGCGGGCGGGGAAGAGGAUGGAGACUGUGGCGUCCGCUGCAACGGUUGGGGCUGCGCGUGAGAAGGUGGCGGUGUAGGCACCUGCGCUCGGGGAAGGCUGGCGGCGGCGGCCGAGCCAUGGCGGGAGACCCCCUUCUCUGGGCUCCCUGAAGUCUCGGGGAGCCGUGACCCAUGGGAUCGUUGAGCAGCCGGGUGCUGCGCCAGCCAAGACCAGCCCUUGCCCAGCAGGCGCAGGGUGCCAGGGCGGGGGGCUCGGCCCGGAGGCCGGACACUGGAGACGAUGCGGCGGGCCACGGAUUCUGUUACUGUGCGGGCAGCCACAAGCGCAAGCGGAGCAGCGGGUCCUUCUGC…	nan nan nan 0.1677 nan nan nan nan nan 0.3106 nan 0.2852 nan nan nan nan 0.1323 nan nan 0.1802 nan nan nan nan 0.2453 nan 0.6311 nan 0.8449 nan 0.0856 nan 0.0467 nan nan 0.1063 nan 0.1199 nan 0.3642 0.2927 0.1336 nan nan 0.6418 0.4496 nan 0.0539 nan nan 0.0733 nan nan nan 0.1513 nan nan nan nan 0.4054 1.0 nan 0.4703 nan nan 0.4335 nan nan nan 0.4039 nan 0.6119 0.3262 nan nan nan nan nan 0.0745 na…	nan nan nan 0.22112341772151897 nan nan nan nan nan 0.4095464135021097 nan 0.37605485232067515 nan nan nan nan 0.17444620253164558 nan nan 0.2376054852320675 nan nan nan nan 0.3234440928270042 nan 0.8321466244725739 nan 1.1140559071729959 nan 0.11286919831223628 nan 0.06157700421940929 nan nan 0.14016350210970466 nan 0.15809599156118145 nan 0.48022151898734183 0.38594409282700426 0.17616033755274…	[0.18593333661556244, 0.2034514844417572, 0.17255637049674988, 0.44564324617385864, 0.1944592297077179, 0.14803814888000488, 0.051966745406389236, 0.07239609956741333, 0.09759433567523956, 0.42725199460983276, 0.1974392831325531, 0.3150132894515991, 0.10584352910518646, 0.28415682911872864, 0.4483003318309784, 0.11625757813453674, 0.1785145103931427, 0.21132853627204895, 0.08612023293972015, 0.15…	[0.145015686750412, 0.12973101437091827, 0.11820181459188461, 0.5217976570129395, 0.13745097815990448, 0.06367676705121994, 0.05394618213176727, 0.04061943292617798, 0.08677034080028534, 0.5973642468452454, 0.07507176697254181, 0.5025514364242554, 0.06586304306983948, 0.10501515865325928, 0.10618125647306442, 0.16125114262104034, 0.24441076815128326, 0.07291683554649353, 0.19195173680782318, 0.34…	0
ENSG00000087502.19	human-mRNA	446	GGGUGCUGUGUUGUUCAAGCUGGACUCCAACUCCCGGACUCAAGUAAUCCUCCCACCUUAGUCUCCUGCAUUGCUGGAAUUAUAGGCACGAGCCACUGCACCUGGCACCCAAAUUACUUCUAGUUCUCAAGUUAGAUGAUUAAUAUCACACUUUUCUCAUGUAUGUUUUAUGAUAGCAUUGAAUUUUUAUAAUUAAAAAUUUACUAAUGCAAACAAGAUUUACAGUCUUUAAUACAAUCUUAAUUUUGGAAUUCAUGAAGGAAUGACUAAGUUCUAAUUUUUUUUUUUUUUUUUUUGAAACUGAGUCUCGCUCUGUCGCCUAGGCUGGAGUGCAGUGGUGCAAUCUCAGCUCACUGCAACCUCCGUCUCCCGGGUUCAAGUGAUUCUCCUGCCUCAGCC…	nan nan nan nan nan nan nan nan nan nan nan nan nan nan nan nan nan nan nan nan nan nan nan nan nan nan nan 0.2092 0.3111 0.5306 0.2247 nan 0.2955 0.1933 0.1803 nan nan 0.2882 0.1989 nan 0.4836 0.3552 0.4381 nan nan 0.6108 0.4682 nan 0.1951 0.0095 nan 0.0448 0.1193 0.086 0.7555 0.5351 0.165 nan nan 0.264 nan nan 0.1866 nan 0.1918 0.0902 nan nan 0.4063 0.6521 nan nan nan 0.1634 nan nan nan 0.3487 …	nan nan nan nan nan nan nan nan nan nan nan nan nan nan nan nan nan nan nan nan nan nan nan nan nan nan nan 0.2758438818565401 0.41020569620253167 0.6996308016877637 0.2962816455696203 nan 0.3896360759493671 0.25487869198312235 0.2377373417721519 nan nan 0.38001054852320676 0.2622626582278481 nan 0.6376582278481012 0.4683544303797469 0.5776635021097046 nan nan 0.8053797468354431 0.617352320675105…	[0.10743618756532669, 0.06871035695075989, 0.060074787586927414, 0.17435817420482635, 0.056707713752985, 0.14086976647377014, 0.25021064281463623, 0.13236112892627716, 0.24688224494457245, 0.22470054030418396, 0.578500509262085, 0.46241217851638794, 0.20733492076396942, 0.37285900115966797, 0.4441538155078888, 0.14348772168159485, 0.2231038212776184, 0.12983182072639465, 0.09941175580024719, 0.14…	[0.0873507708311081, 0.028782740235328674, 0.07157143205404282, 0.07562478631734848, 0.20903338491916656, 0.37092748284339905, 0.10547076910734177, 0.11154365539550781, 0.275676429271698, 0.11883594840765, 0.16363587975502014, 0.19707627594470978, 0.06286546587944031, 0.15157251060009003, 0.13162913918495178, 0.6882461309432983, 0.5796668529510498, 0.6265267133712769, 0.13663557171821594, 0.45090…	26.46
ENSG00000087842.11	human-mRNA	636	GGGAGGGGUUGGAGCGAGGGUCCGGAGAAGCAUUGGCAGACCCGAGUUAAAAAAUCUGGAUCCGUUUUUACUGUUUGAUGAAUUUAAAGGAGGUAGACCAGGAGGAUUUCCUGAUCAUCCACAUCGAGGUUUUGAAACAGUAUCCUACCUCCUGGAAGGGGGCAGCAUGGCCCAUGAAGACUUCUGUGGACACACUGGUAAAAUGAACCCAGGAGAUUUGCAGUGGAUGACUGCGGGCCGGGGCAUUCUGCACGCUGAGAUGCCUUGCUCAGAGGAGCCAGCCCAUGGCCUACAACUGUGGGUUAAUUUGAGGAGCUCAGAGAAGAUGGUGGAGCCUCAGUACCAGGAACUGAAAAGUGAAGAAAUCCCUAAACCCAGUAAGGAUGGUGUGACAGUUGC…	nan nan nan 0.166 nan nan nan nan nan nan nan nan 0.4206 nan 0.6063 nan 0.5947 nan nan nan nan 0.1097 0.0904 nan nan 0.2996 nan 0.8423 0.7201 nan 0.5109 0.6184 nan nan nan nan 0.3134 0.6983 nan 0.572 0.3369 0.1171 0.1128 nan 0.6715 nan nan nan nan nan nan nan nan nan nan 0.1381 nan nan nan 0.2854 nan 0.1061 0.0994 nan nan nan nan nan nan 0.2121 0.1205 nan nan nan nan nan nan 0.5549 nan nan 0.5477…	nan nan nan 0.2188818565400844 nan nan nan nan nan nan nan nan 0.5545886075949367 nan 0.7994462025316456 nan 0.7841508438818566 nan nan nan nan 0.14464662447257384 0.11919831223628692 nan nan 0.395042194092827 nan 1.1106276371308017 0.9494989451476793 nan 0.6736550632911393 0.8154008438818565 nan nan nan nan 0.4132383966244726 0.9207542194092828 nan 0.7542194092827004 0.4442246835443038 0.1544040…	[0.1854223757982254, 0.18308740854263306, 0.1508810669183731, 0.31449830532073975, 0.11944714188575745, 0.1417233645915985, 0.052975498139858246, 0.09404107928276062, 0.4054705798625946, 0.4672442078590393, 0.261349618434906, 0.13648375868797302, 0.3520599603652954, 0.1846512258052826, 0.3190925121307373, 0.2618522346019745, 0.41717618703842163, 0.0953468531370163, 0.10282669216394424, 0.14943608…	[0.14419499039649963, 0.07279305160045624, 0.10240603238344193, 0.5639780759811401, 0.09173282980918884, 0.04508189857006073, 0.03311888873577118, 0.10575537383556366, 0.10314435511827469, 0.11209596693515778, 0.08268710970878601, 0.0639176070690155, 0.6669948101043701, 0.11943227052688599, 0.598888635635376, 0.12720447778701782, 0.7710166573524475, 0.061062589287757874, 0.049756795167922974, 0.0…	0
ENSG00000088179.9	human-mRNA	917	GGGAGUAGCACCAGGAACACCUGCUGACCUCUGUGUCCCUAGACUGAAUGAAGGGGACCAAGUUGUACUGAUCAAUGGUCGGGACAUUGCAGAACACACUCAUGAUCAGGUUGUGCUGUUUAUUAAAGCUAGUUGUGAGAGACAUUCUGGGGAACUCAUGCUUCUAGUUCGACCUAAUGCUGUAUAUGAUGUAGUGGAAGAAAAGCUAGAAAAUGAGCCAGAUUUCCAGUAUAUUCCUGAGAAAGCCCCACUAGAUAGUGUGCAUCAGGAUGACCAUUCCCUGCGGGAGUCAAUGAUCCAGCUAGCUGAGGGGCUUAUCACUGGAACAGUCCUGACACAGUUUGAUCAACUGUAUCGGAAAAAACCUGGAAUGACAAUGUCCUGUGCCAAAUUACCUCA…	nan nan nan 0.2414 nan nan 0.176 nan 0.1324 0.2031 0.2382 0.0926 0.1949 nan nan 0.2984 0.5131 0.4734 0.4316 0.1414 0.0424 nan nan 0.1354 nan nan 0.2789 0.1727 0.0742 nan 0.1597 nan nan nan nan nan 0.0199 0.0312 0.0212 nan 0.4209 nan 1.0 0.8248 nan nan 0.6314 0.6046 nan nan 0.9774 0.8674 nan nan nan nan 0.1123 0.0455 0.2709 0.3711 0.4281 nan nan nan nan nan 0.1927 0.1094 nan nan 0.3255 nan 0.5292 …	nan nan nan 0.3183016877637131 nan nan 0.2320675105485232 nan 0.17457805907172996 0.26780063291139244 0.31408227848101267 0.12209915611814347 0.2569883966244726 nan nan 0.39345991561181437 0.6765559071729959 0.6242088607594937 0.5690928270042194 0.1864451476793249 0.055907172995780595 nan nan 0.1785337552742616 nan nan 0.36774789029535865 0.2277162447257384 0.09783755274261605 nan 0.2105748945147…	[0.22036747634410858, 0.24607494473457336, 0.15907511115074158, 0.41688573360443115, 0.16089022159576416, 0.4193130135536194, 0.269321471452713, 0.23721343278884888, 0.2849869430065155, 0.3031516373157501, 0.1829199492931366, 0.10621663182973862, 0.20443546772003174, 0.11653588712215424, 0.25440993905067444, 0.4431862533092499, 0.2998928129673004, 0.1959204524755478, 0.45566096901893616, 0.086935…	[0.19940513372421265, 0.08826711773872375, 0.08318132907152176, 0.8514887690544128, 0.15885427594184875, 0.13240838050842285, 0.7973940372467041, 0.20402047038078308, 0.7124687433242798, 0.8298412561416626, 0.3749018609523773, 0.30164623260498047, 0.8011131286621094, 0.11056602746248245, 0.12956646084785461, 0.8779298067092896, 0.8261579275131226, 0.7751814126968384, 0.811020016670227, 0.31223383…	0
ENSG00000088256.9	human-mRNA	789	GGGAAACACACAAGCGCCCCGUGCCCCCAGUGACUCUGGGCCUCACAGAGCCCCCGCCAGCCAGCAUGGGGCCCCGCCCUGCAGCCAGUCACGCGCCCCCACACCGCAGCCCCCCGUGGCUGUCCUUCCAACCCCACGUGCUUUUUCUUUCUCCUGCCCGCUUCUUUUCUUCAUCACAAAAGGCGUGGAGACUCGGAGACGGACGUUUUUCCCCUUUUUUAAGUUAUUGACGCCCAGCGCGCCUCGCCUCUUCACCCAUCAACGCUGUGCUUUGCCCACUGGACUCCUGAAGAGGGGGUGGGGGGCUCCCUCGGUCGCCCACCCUGGGAAGUGCCUAACCUUUUAUUUUAUUUUAUUUUUUUGAGGAAAAAGAACGCCUGACUCACAGGUUGAAGAAAC…	nan nan nan 0.5538 0.3126 0.1864 0.4936 0.315 0.3605 0.5413 0.6904 0.4311 0.3333 nan 0.5931 nan 0.059 0.0316 0.0335 0.058 nan nan nan 0.1057 0.1187 0.0416 0.0763 0.1494 0.4324 nan nan nan 0.3925 0.1818 nan 0.1596 nan nan nan nan 0.3281 0.1432 nan 0.2234 1.0 0.3242 0.3276 nan 0.297 nan 0.0929 0.0697 0.1332 0.2288 0.4153 nan 0.2159 0.1088 0.1799 nan 0.1569 0.1463 0.5929 nan 0.1456 0.2987 nan nan na…	nan nan nan 0.7302215189873418 0.4121835443037975 0.2457805907172996 0.6508438818565401 0.41534810126582283 0.4753428270042194 0.7137394514767933 0.9103375527426161 0.5684335443037974 0.43947784810126583 nan 0.7820411392405063 nan 0.07779535864978902 0.04166666666666667 0.044171940928270044 0.07647679324894516 nan nan nan 0.13937236286919832 0.1565137130801688 0.05485232067510549 0.10060654008438…	[0.1711263507604599, 0.1485067903995514, 0.2076716125011444, 0.2900512218475342, 0.6631426811218262, 0.18292176723480225, 0.24992632865905762, 0.014853853732347488, 0.037349626421928406, 0.0051601119339466095, 0.194392591714859, 0.3358743190765381, 0.6118025183677673, 0.2676102817058563, 0.19643057882785797, 0.2580973505973816, 0.10508987307548523, 0.07646985352039337, 0.07632891833782196, 0.0994…	[0.15547028183937073, 0.10703644156455994, 0.062491342425346375, 0.7305924892425537, 0.6528812646865845, 0.5298426747322083, 0.6123796701431274, 0.701921820640564, 0.6378440856933594, 0.6873414516448975, 0.6645560264587402, 0.6949478387832642, 0.5721005797386169, 0.06835977733135223, 0.663857638835907, 0.19583964347839355, 0.3387793302536011, 0.16398885846138, 0.17366889119148254, 0.4230156540870…	0
ENSG00000088451.11	human-mRNA	1019	GGGACGUUUUGGUAAGUGCUGCUCAUGAAGCCAGAGUGGAGAAGUUUAUUUAUGUCAGCACAGAUGAAGUAUAUGGUGGCAGUCUUGAUAAGGAAUUUGAUGAAUCUUCACCCAAACAACCUACAAAUCCUUAUGCAUCAUCUAAAGCAGCUGCUGAAUGUUUUGUACAGUCUUACUGGGAACAAUAUAAGUUUCCAGUUGUCAUCACAAGAAGCAGUAAUGUUUAUGGACCACAUCAAUAUCCAGAAAAGGUUAUUCCAAAAUUUAUAUCUUUGCUACAGCACAACAGGAAAUGUUGCAUUCAUGGGUCAGGGCUUCAAACAAGAAACUUCCUUUAUGCUACUGAUGUUGUAGAAGCAUUUCUCACUGUCCUCAAAAAAGGGAAACCAGGUGAAAUUU…	nan nan nan 0.2509 0.7622 nan nan nan nan nan nan nan nan 0.3272 0.3619 nan nan nan 0.05 nan nan 0.3275 nan 0.1023 0.1311 nan nan 0.1756 0.2456 nan 0.2518 0.2528 0.4895 nan 0.6822 nan nan nan nan 0.5016 nan 0.6025 0.952 nan nan nan nan 0.3415 nan nan nan 0.1898 nan nan nan 0.2675 0.1654 nan 0.1098 0.2075 0.2854 0.4467 nan 0.4104 nan nan 0.3507 0.3711 nan nan 0.4106 nan 0.3836 nan nan nan nan nan …	nan nan nan 0.33082805907172996 1.0050105485232068 nan nan nan nan nan nan nan nan 0.43143459915611815 0.47718881856540085 nan nan nan 0.0659282700421941 nan nan 0.43183016877637137 nan 0.1348892405063291 0.17286392405063292 nan nan 0.23154008438818569 0.3238396624472574 nan 0.3320147679324895 0.33333333333333337 0.6454377637130801 nan 0.8995253164556963 nan nan nan nan 0.6613924050632912 nan 0.7…	[0.2177276760339737, 0.21186234056949615, 0.14845839142799377, 0.17929814755916595, 0.2951132655143738, 0.25477680563926697, 0.4055096507072449, 0.3024457097053528, 0.3168982267379761, 0.1893841028213501, 0.16507664322853088, 0.13449327647686005, 0.5221906900405884, 0.48263341188430786, 0.5455510020256042, 0.48988574743270874, 0.16788101196289062, 0.29693785309791565, 0.079848513007164, 0.0327020…	[0.20404601097106934, 0.14886100590229034, 0.11057068407535553, 0.4666355848312378, 0.5931692123413086, 0.1816210001707077, 0.08906123042106628, 0.08968360722064972, 0.09981976449489594, 0.04460154473781586, 0.09095349907875061, 0.11552448570728302, 0.20504429936408997, 0.5506283044815063, 0.7687562704086304, 0.16354748606681824, 0.13558554649353027, 0.21851176023483276, 0.3178499937057495, 0.108…	0
ENSG00000088854.13	human-mRNA	918	GGGUGCCUGCCUCCCCUGCUAGGCCCGUUUCCCUGAAGGAGCUGGCCGUACUGGCCGUGGGCCCAGUCCUGGGAGGAGCAGCACAGCCUUGCCCAGGCCCAGUCCACAGAGCCAGCAGCUUGGGUUGAGAUGAAUGAUGUGUUCACAAAUGAGGGGAUUUCCCUUCUGGACUAAACUGAAGGAGAGGCUUGUUGCUUUCCAGAGGUGUGUGGCUCUUAAGUUGACAUCAGCUUUUCCCCUUGUGGGUGGUUCUUUAGCUCUCCUGUCACACCAUUCGGGUGUCCUAAUGUAGGGACAAGAGCAAGCCUGCUGCUCAGGCCCCCUGGCGAGGCUUCACCUCACUGUGGAAGGGGGCGUCCUGCAGCUGGUUAGUCUUAGGCCUGGUGGCUGAUCACUUGU…	nan nan nan nan nan 0.6468 0.2323 nan nan 0.1718 0.0375 nan 0.0472 0.0363 0.054 0.2634 nan nan 0.1545 nan 0.6543 nan nan 0.035 0.0349 0.22 nan nan nan nan 0.0906 0.0617 0.5029 nan nan 1.0 1.0 nan nan 0.2539 nan 0.9024 nan nan nan 0.0368 0.039 nan nan 0.8568 0.5883 nan nan nan 0.0912 0.1183 nan nan nan nan nan 0.0412 0.1142 0.2784 0.2114 nan nan 0.378 0.1877 nan nan nan nan 0.3101 nan nan 0.5986 n…	nan nan nan nan nan 0.8528481012658229 0.3063027426160338 nan nan 0.22652953586497893 0.04944620253164557 nan 0.06223628691983123 0.04786392405063291 0.07120253164556962 0.34731012658227856 nan nan 0.20371835443037975 nan 0.8627373417721519 nan nan 0.04614978902953587 0.04601793248945148 0.290084388185654 nan nan nan nan 0.11946202531645571 0.08135548523206751 0.6631065400843882 nan nan 1.3185654…	[0.19930753111839294, 0.18190351128578186, 0.1381106972694397, 0.39074626564979553, 0.2938615083694458, 0.07470772415399551, 0.07975360751152039, 0.1920083463191986, 0.28882235288619995, 0.07524118572473526, 0.07003465294837952, 0.22498561441898346, 0.038275763392448425, 0.03229221701622009, 0.0358862467110157, 0.025194890797138214, 0.19929546117782593, 0.31088924407958984, 0.21111318469047546, 0…	[0.16347041726112366, 0.08571899682283401, 0.19901609420776367, 0.14911143481731415, 0.22958984971046448, 0.5507525205612183, 0.3478010892868042, 0.14234834909439087, 0.11866829544305801, 0.4529544711112976, 0.24004130065441132, 0.10169394314289093, 0.24950926005840302, 0.1790246218442917, 0.21265017986297607, 0.2795908451080322, 0.13244560360908508, 0.13552474975585938, 0.6391369700431824, 0.103…	0
ENSG00000088930.8	human-mRNA	338	GGGAAAUCCAGCAAUGGACGGCAGUGGAAGCCUCAGCUUGGCUUUAACCGUGACCGGAGGCCUGUGCACCUGGAUCAGGCAGCCUUCAGGACUUUGGGCCAUGUGAUGCCAAGAGGCUCAGGAACUGGCAUUUACAGCAAUGCUGCACCACCACCUGUGACUUACCAGGGAAACUUAUACAGGCCGCUUUUGAGAGGACAAGCCCAGAUUCCAAAACUUAUGUCAAAUAUGAGGCCCCAGGAUUCCUGGCGAGGUCCUCCUCCCCUUUUCCAGCAGCAAAGGUUUGACAGAGGCGUUGGGGCUGAACCUCUGCUCCCAUGGAACCGGAUGCUGCAAAC	nan nan nan 0.384 0.532 0.4604 nan 0.127 0.0653 0.1316 nan 0.7615 0.3981 0.2887 nan nan nan 0.3938 0.4866 nan nan 0.1426 0.205 nan nan nan nan 0.5261 0.1952 nan 0.0307 0.0208 nan 0.4495 0.7404 nan 0.6471 nan nan nan nan 0.0259 nan nan nan 0.9261 0.6283 1.0 0.1082 nan nan nan 0.314 0.0628 0.0362 nan nan 0.1014 nan nan 0.0181 0.0184 nan nan nan nan 0.1284 1.0 0.0383 0.0179 nan nan nan 0.9151 nan 0.…	nan nan nan 0.5063291139240507 0.7014767932489452 0.6070675105485233 nan 0.16745780590717302 0.08610232067510548 0.17352320675105484 nan 1.004087552742616 0.5249208860759494 0.38066983122362874 nan nan nan 0.5192510548523207 0.6416139240506329 nan nan 0.18802742616033757 0.2703059071729958 nan nan nan nan 0.6936972573839663 0.25738396624472576 nan 0.04047995780590718 0.027426160337552744 nan 0.59…	[0.20226377248764038, 0.17019471526145935, 0.2021155059337616, 0.25660842657089233, 0.3441011309623718, 0.1896456778049469, 0.22017693519592285, 0.09450514614582062, 0.015433132648468018, 0.07090248167514801, 0.1284131407737732, 0.3743950426578522, 0.21985945105552673, 0.8181700110435486, 0.45488041639328003, 0.1441226303577423, 0.18245239555835724, 0.17000682651996613, 0.22939136624336243, 0.149…	[0.11780834197998047, 0.09063079208135605, 0.11619426310062408, 0.4046216607093811, 0.6446300745010376, 0.7382878065109253, 0.21102072298526764, 0.30324169993400574, 0.15123891830444336, 0.4383692741394043, 0.18419703841209412, 0.9991979598999023, 0.992324709892273, 0.8236238956451416, 0.2193092703819275, 0.07673030346632004, 0.11546319723129272, 0.5712673664093018, 0.9183543920516968, 0.14302057…	0
ENSG00000089116.4	human-mRNA	562	GGGCAGGUUCACCGACAUGAUCUCGCACCCGGACACACCGAGCCCCGAGCCAGGCCUGCCGGGCACGCUGCACCCCAUGCCCGGCGAGGUAUUCAGCGGCGGGCCCAGCCCGCCCUUCCCAAUGAGCGGCACCAGCGGCUACAGCGGACCCCUGUCGCAUCCCAACCCCGAGCUCAACGAAGCCGCCGUGUGGUAAGGCCGCCGGGCCGCCCCCCGCGCUCGGCCCCCGGGGGCCCCGCCCCGAAGCAGCCUCCUGAAACCAAAACGCCCGACGCAGACGCGGUGGGAGACGUGGGUGUCCCUCGGGGGUUCUCUCUCGGGUCCGCACUCAACUGGCAGCUGCUCCUCGGCUGGGCGCCGAGGGGGGGCCGACCCCCAUCUCCACCCCGCGGGCUCUCC…	nan nan nan nan nan nan nan nan nan 0.464 0.5088 0.4301 0.2598 nan 0.7017 0.9332 0.849 nan nan 0.6121 nan 0.3007 nan 0.352 nan 0.3652 0.5791 0.458 0.3046 0.1011 nan nan 0.4358 0.736 0.7581 0.7189 1.0 0.3263 0.1395 nan 0.5651 nan 0.3889 0.1226 0.1311 0.189 nan 0.508 nan 0.4629 0.5286 0.4945 nan nan 0.068 0.0344 nan nan 0.0696 0.0291 nan nan nan 0.0403 0.223 0.4448 nan 0.6094 nan nan 0.2033 0.2207 …	nan nan nan nan nan nan nan nan nan 0.6118143459915613 0.6708860759493671 0.5671149789029536 0.3425632911392405 nan 0.9252373417721519 1.2304852320675106 1.1194620253164558 nan nan 0.8070938818565401 nan 0.3964926160337553 nan 0.4641350210970464 nan 0.4815400843881857 0.763581223628692 0.6039029535864979 0.4016350210970464 0.13330696202531644 nan nan 0.5746308016877638 0.9704641350210971 0.999604…	[0.15406140685081482, 0.1503925621509552, 0.12736418843269348, 0.27221500873565674, 0.21479351818561554, 0.229272723197937, 0.2755104899406433, 0.49290281534194946, 0.45170992612838745, 0.2954697906970978, 0.3662652373313904, 0.22205768525600433, 0.1743319034576416, 0.2968985438346863, 0.28284910321235657, 0.2175178825855255, 0.5246373414993286, 0.6743581295013428, 0.26140862703323364, 0.50054156…	[0.06509953737258911, 0.033568620681762695, 0.13369306921958923, 0.33840176463127136, 0.41458600759506226, 0.06476068496704102, 0.06831102073192596, 0.12781229615211487, 0.1021500676870346, 0.4161131978034973, 0.5167710781097412, 0.373375803232193, 0.19605842232704163, 0.06280633807182312, 0.5223070383071899, 0.524761438369751, 0.41908031702041626, 0.1834610253572464, 0.08608947694301605, 0.52048…	0
ENSG00000089289.16	human-mRNA	974	GGGAGGACGAGUUACAGCUGCCGCGGCUCCCCGAGCUGUUCGAAACUGGUAGACAGUUACUGGACGAAGUAGAAGUGGCGACUGAACCCGCCGGUUCCCGGAUAGUCCAGGAGAAGGUGUUCAAGGGCUUGGACCUCCUUGAGAAGGCUGCCGAAAUGUUAUCGCAGCUCGACUUGUUCAGCCGAAAUGAAGAUUUGGAAGAGAUUGCUUCCACCGACCUGAAGUACCUUUUGGUGCCAGCGUUUCAAGGAGCCCUCACCAUGAAACAAGUCAACCCCAGCAAGCGUCUAGAUCAUUUGCAGCGGGCUCGAGAACACUUUAUAAACUACUUAACUCAGUGCCAUUGCUAUCAUGUGGCAGAGUUUGAGCUGCCCAAAACCAUGAACAACUCUGCUGAAA…	nan nan nan 0.2614 nan nan 0.3122 0.1995 nan 0.2813 nan nan nan 0.4772 0.4217 0.3862 nan 0.1385 nan nan 0.1743 0.3496 nan 0.2159 nan nan 0.0628 nan 0.1563 0.1957 0.243 0.4262 nan 0.2949 nan 0.1323 nan nan nan nan 0.2373 nan 0.6082 0.3908 0.3201 0.2374 nan nan nan nan 0.8443 nan 0.6079 0.2065 0.2299 nan nan nan 0.5486 0.1845 nan nan nan 0.2166 0.1835 nan 0.839 0.9007 nan nan 0.6718 nan 0.2966 0.37…	nan nan nan 0.34467299578059074 nan nan 0.4116561181434599 0.26305379746835444 nan 0.370912447257384 nan nan nan 0.6292194092827005 0.556039029535865 0.5092299578059072 nan 0.18262130801687765 nan nan 0.22982594936708864 0.46097046413502113 nan 0.2846782700421941 nan nan 0.08280590717299578 nan 0.20609177215189875 0.2580432489451477 0.3204113924050633 0.5619725738396625 nan 0.3888449367088608 nan…	[0.23850443959236145, 0.24855172634124756, 0.1731354147195816, 0.2993345856666565, 0.3822978734970093, 0.25906097888946533, 0.24921447038650513, 0.2531954050064087, 0.2469547688961029, 0.19827090203762054, 0.3056163787841797, 0.6306581497192383, 0.5321710705757141, 0.6835401654243469, 0.1255190670490265, 0.2771887481212616, 0.09705479443073273, 0.1252240538597107, 0.25364190340042114, 0.247112303…	[0.13817308843135834, 0.11277159303426743, 0.13043586909770966, 0.5985320806503296, 0.14113500714302063, 0.09463736414909363, 0.6519108414649963, 0.5320488214492798, 0.1962910294532776, 0.793035626411438, 0.08519571274518967, 0.12471065670251846, 0.21428532898426056, 0.7628065347671509, 0.5745903253555298, 0.7469973564147949, 0.13562063872814178, 0.271384596824646, 0.14247292280197144, 0.12503072…	0
ENSG00000089876.12	human-mRNA	734	GGGUGUGCCACAUGGAGCUGAAGAGGCUGCCUUGACUUGUUGGAAGACAUUUUUACAUCCCGAAGGAGAUCACUUUACCCUCAUCAGCAUUUACAAGGCUUACCAAGACACAACUCUGAAUUCUAGCAGUGAGUACUGUGUGGAAAAGUGGUGUCGUGAUUACUUCCUCAACUGUUCAGCACUCAGAAUGGCAGAUGUUAUUCGAGCUGAACUCUUAGAAAUUAUCAAGCGAAUCGAGCUUCCCUAUGCAGAACCUGCUUUUGGCUCCAAGGAAAACACUCUAAACAUAAAGAAAGCUCUUCUGUCCGGUUACUUUAUGCAGAUUGCUCGGGAUGUUGAUGGAUCAGGUAACUACUUAAUGCUGACACAUAAGCAGGUUGCUCAGCUGCAUCCCCUGUC…	nan nan nan nan nan nan nan 0.4347 0.3346 0.5004 0.5838 0.5661 nan nan nan 0.2109 nan 0.0677 nan nan 0.2406 0.2213 nan 0.3898 nan nan 0.3666 nan nan 0.1132 0.4235 nan nan nan 0.653 0.6796 nan nan nan nan nan nan nan 0.3334 0.3144 nan 0.5999 0.6028 0.2012 nan nan nan nan nan 0.4485 0.4575 0.3454 nan 0.1559 0.149 0.2482 nan 0.6335 0.587 nan nan 0.3838 nan 0.4158 nan 0.2562 0.2672 0.3002 nan nan nan…	nan nan nan nan nan nan nan 0.5731803797468354 0.4411919831223629 0.6598101265822784 0.7697784810126582 0.7464398734177217 nan nan nan 0.2780854430379747 nan 0.0892668776371308 nan nan 0.317246835443038 0.29179852320675104 nan 0.5139767932489452 nan nan 0.4833860759493671 nan nan 0.14926160337552744 0.5584124472573839 nan nan nan 0.8610232067510549 0.8960970464135021 nan nan nan nan nan nan nan 0…	[0.16196659207344055, 0.22226327657699585, 0.24442635476589203, 0.4499105215072632, 0.23186123371124268, 0.4618062376976013, 0.4667413532733917, 0.16655504703521729, 0.07764199376106262, 0.29409030079841614, 0.15525035560131073, 0.34885358810424805, 0.6481252908706665, 0.31394436955451965, 0.15061797201633453, 0.30351847410202026, 0.1029675155878067, 0.2221548855304718, 0.22218585014343262, 0.209…	[0.09206665307283401, 0.04937852919101715, 0.20680010318756104, 0.221029132604599, 0.2416929453611374, 0.23536576330661774, 0.19355124235153198, 0.3563281297683716, 0.2941329777240753, 0.633264422416687, 0.6788156628608704, 0.7463177442550659, 0.3021589517593384, 0.12367893755435944, 0.08175794035196304, 0.8479431867599487, 0.15056023001670837, 0.33862626552581787, 0.15488451719284058, 0.08369057…	0
ENSG00000090889.12	human-mRNA	642	GGGAAAGCGCUUGCACUGAAAGAGGCCCUGGCUAGGAAGAUGACUCAGAAUGACAGCCAACUGCAGCCCAUUCAGUACCAAUACCAGGAUAACAUAAAAGAGCUAGAAUUAGAAGUCAUCAAUCUGCAAAAGGAAAAGGAAGAAUUGGUUCUUGAACUUCAGACAGCAAAGAAGGAUGCCAACCAAGCCAAGUUGAGUGAGCGCCGCCGCAAACGUCUCCAGGAGCUGGAGGGUCAAAUUGCUGAUCUGAAGAAGAAACUGAAUGAGCAGUCCAAACUUCUGAAACUAAAGGAAUCCACAGAGCGUACUGUCUCCAAACUGAACCAGGAGAUACGGAUGAUGAAAAACCAGCGGGUACAGUUAAUGCGUCAAAUGAAAGAAGAUGCUGAGAAGUUUAGA…	nan nan nan 0.7012 0.3494 0.3146 nan 0.3183 nan 0.2085 nan nan nan 0.2967 0.3825 0.3009 nan nan 0.488 0.529 0.4921 nan 0.5027 nan nan 0.1595 0.1756 0.1246 nan nan nan 0.2747 nan 0.5755 nan nan 0.651 0.7582 nan 0.3428 nan nan 0.3808 0.146 nan 0.2524 0.6872 nan 0.5303 0.4196 nan nan 1.0 0.5713 0.3768 nan 0.158 0.3595 0.5686 0.8499 0.4786 nan nan 0.4681 0.5807 nan 0.1358 0.1497 0.3148 0.3181 nan nan…	nan nan nan 0.9245780590717301 0.4607067510548523 0.41482067510548526 nan 0.41969936708860767 nan 0.2749208860759494 nan nan nan 0.3912183544303798 0.5043512658227849 0.39675632911392406 nan nan 0.6434599156118144 0.6975210970464135 0.6488660337552743 nan 0.6628428270042195 nan nan 0.21031118143459918 0.23154008438818569 0.16429324894514769 nan nan nan 0.36220991561181437 nan 0.7588343881856541 n…	[0.21552567183971405, 0.20548835396766663, 0.30658477544784546, 0.25509461760520935, 0.3924272358417511, 0.36935538053512573, 0.5561923980712891, 0.22608962655067444, 0.06015535444021225, 0.36280348896980286, 0.2935570478439331, 0.5086912512779236, 0.2750057578086853, 0.5895874500274658, 0.16833986341953278, 0.2688584327697754, 0.24112898111343384, 0.33606791496276855, 0.27117547392845154, 0.5046…	[0.14308927953243256, 0.08207914978265762, 0.09346072375774384, 0.6225550174713135, 0.8259385824203491, 0.6021833419799805, 0.14696569740772247, 0.5824023485183716, 0.2486114203929901, 0.36882710456848145, 0.17239956557750702, 0.157502219080925, 0.1826363503932953, 0.8849442601203918, 0.4759121239185333, 0.39391446113586426, 0.18683400750160217, 0.1139291450381279, 0.5425986051559448, 0.581287920…	0
ENSG00000091009.8	human-mRNA	855	GGGCUGAGCGACUUCAGUUGGGGACACCGCCUCCUCUGUUGGCAGCUCGUUUGGUGCCACCUCGAAACCUCAUGGGAUCCUCCAUUGGAUACCAUACCUCAGUCUCCAGCCCUACCCCUCUGGUUCCAGAUACAUAUGAACCAGAUGGUUACAACCCAGAAGCUCCUAGUAUUACUAGUUCUGGUAGAUCUCAGUACAGACAGUUCUUUUCAAGAACUCAGACACAGCGUCCCAAUCUGAUUGGCCUAACAUCUGGAGAUAUGGAUGUAAAUCCAAGAGCUGCUAACAUUGUGAUCCAGACUGAACCACCAGUUCCUGUUUCGAUUAAUAGCAACAUAACCAGAGUAGUUCUUGAACCAGAUAGUCGAAAAAGAGCUAUGAGUGGUUUGGAAGGGCCAC…	nan nan nan 0.2012 nan nan 0.2812 nan 0.7869 nan 0.4771 0.4057 nan nan 0.6489 0.5162 nan nan nan nan nan nan nan 0.5216 0.3016 0.4366 0.4519 0.2321 nan 0.2463 0.0808 nan 0.1273 0.0853 nan 0.3257 nan nan nan nan nan nan 0.446 0.4104 nan 0.1973 nan 0.9957 nan nan nan nan nan nan nan nan 0.0888 0.1117 0.2829 0.1717 0.1084 nan 0.4994 nan 0.5762 0.6908 0.6527 0.8059 0.5584 nan 0.6819 0.1961 nan nan na…	nan nan nan 0.26529535864978904 nan nan 0.37078059071729963 nan 1.0375791139240507 nan 0.6290875527426161 0.5349419831223629 nan nan 0.855617088607595 0.6806434599156118 nan nan nan nan nan nan nan 0.6877637130801687 0.39767932489451474 0.5756856540084389 0.5958597046413503 0.306039029535865 nan 0.3247626582278481 0.10654008438818566 nan 0.16785337552742616 0.11247362869198313 nan 0.4294567510548…	[0.11873440444469452, 0.1782512366771698, 0.03843899816274643, 0.15192043781280518, 0.1689610779285431, 0.17768491804599762, 0.1783306747674942, 0.2958245575428009, 0.22549687325954437, 0.3925226032733917, 0.5231692790985107, 0.18324655294418335, 0.40048637986183167, 0.32986217737197876, 0.18720507621765137, 0.5708537697792053, 0.20473936200141907, 0.40192997455596924, 0.35782286524772644, 0.0628…	[0.08766813576221466, 0.04824189841747284, 0.13950423896312714, 0.34518492221832275, 0.16864117980003357, 0.12247934937477112, 0.7442278861999512, 0.18604934215545654, 0.7118266820907593, 0.2432839572429657, 0.9232203960418701, 0.49391472339630127, 0.17624890804290771, 0.14386865496635437, 0.4729214906692505, 0.7936536073684692, 0.15047873556613922, 0.20375649631023407, 0.16388526558876038, 0.137…	0
[truncated: 2,464 more rows]

## Sheet: SARS-CoV-2 Padding
Source	Start	End	Length	Putative	Sequence	Sequence (E-Padding)	Sequence (Flanking)	Sequence (E-Padding+Flanking)	RNet Predicted SHAPE (E-Padding)	RNet Predicted DMS (E-Padding)	RNet Predicted SHAPE (Flanking)	RNet Predicted DMS (Flanking)	RNet Predicted SHAPE (E-Padding+Flanking)	RNet Predicted DMS (E-Padding+Flanking)	RNet Predicted SHAPE (E-Padding+Flanking+C-Padding207)	RNet Predicted DMS (E-Padding+Flanking+C-Padding207)	RNet Predicted SHAPE (E-Padding+Flanking+C-Padding307)	RNet Predicted DMS (E-Padding+Flanking+C-Padding307)	RNet Predicted SHAPE (E-Padding+Flanking+C-Padding457)	RNet Predicted DMS (E-Padding+Flanking+C-Padding457)
[truncated: 40 more rows]

## Sheet: E. coli Padding
Start	End	Length	Putative	Sequence	Sequence (E-Padding)	Sequence (Flanking)	Sequence (E-Padding+Flanking)	RNet Predicted SHAPE (E-Padding)	RNet Predicted DMS (E-Padding)	RNet Predicted SHAPE (Flanking)	RNet Predicted DMS (Flanking)	RNet Predicted SHAPE (E-Padding+Flanking)	RNet Predicted DMS (E-Padding+Flanking)	RNet Predicted SHAPE (E-Padding+Flanking+C-Padding207)	RNet Predicted DMS (E-Padding+Flanking+C-Padding207)	RNet Predicted SHAPE (E-Padding+Flanking+C-Padding307)	RNet Predicted DMS (E-Padding+Flanking+C-Padding307)	RNet Predicted SHAPE (E-Padding+Flanking+C-Padding457)	RNet Predicted DMS (E-Padding+Flanking+C-Padding457)
[truncated: 58 more rows]

[truncated: 2 more sheets: HIV-1 Padding, H. sapiens Padding]
